# Supplementary material for: Tuberculosis screening among ambulatory people living with HIV: a systematic review and individual participant data meta-analysis
Source: PubMed Central journal article supplement (PMC8942858; doi:10.1016/s1473-3099(21)00387-x), 2022-04
Supplement: mmc1.pdf [file mmc1.pdf]

# THE LANCET

## Infectious Diseases

### Supplementary appendix

This appendix formed part of the original submission and has been peer reviewed. We post it as supplied by the authors.

Supplement to: Dhana A, Hamada Y, Kengne AP, et al. Tuberculosis screening among ambulatory people living with HIV: a systematic review and individual participant data meta-analysis. *Lancet Infect Dis* 2021; published online Nov 17. [https://doi.org/10.1016/S1473-3099\(21\)00387-X](https://doi.org/10.1016/S1473-3099(21)00387-X).

# Supplementary Figures and Tables

## Table of Contents

|                                                                                                                                                              |     |
|--------------------------------------------------------------------------------------------------------------------------------------------------------------|-----|
| Table S1 - Search terms.....                                                                                                                                 | 2   |
| Table S2 - Variables sought .....                                                                                                                            | 3   |
| Table S3 - Study-level characteristics.....                                                                                                                  | 4   |
| Table S4 - Percentage of missing data for each variable by study†§ .....                                                                                     | 6   |
| Table S5 - Summary of main characteristics for participants overall and by each study.....                                                                   | 7   |
| Table S6 - Prevalence of tuberculosis in all participants and by different subgroups (using culture or Xpert as reference standard) .....                    | 11  |
| Table S7 - Indirect comparisons between each test and WHO four-symptom screen for the detection of tuberculosis in subgroups .....                           | 12  |
| Table S8 - Direct comparisons between each test and WHO four-symptom screen for the detection of tuberculosis in all participants and subgroups.....         | 17  |
| Table S9 - Additional diagnostic accuracy estimates.....                                                                                                     | 23  |
| Table S10 - Yield of different screening and diagnostic algorithms when screening a population of 1000 persons .....                                         | 29  |
| Table S11 - Sensitivity analyses using different reference standards.....                                                                                    | 47  |
| Table S12 - Sensitivity analyses comparing W4SS followed by Xpert with CRP ( $\geq 10$ mg) followed by Xpert in all participants and by subgroups† .....     | 53  |
| Figure S1 - Risk of bias and applicability results on the QUADAS-2 criteria tool .....                                                                       | 54  |
| Figure S2 - Plots of sensitivity and specificity for each screening test for the detection of tuberculosis.....                                              | 56  |
| Figure S3 - Forest plots of sensitivity and specificity estimates in all participants and subgroups .....                                                    | 62  |
| Figure S4 - Summary receiver operating characteristics curves in all participants and subgroups (for tests/strategies with $\geq 2$ studies available) ..... | 122 |
| Figure S5 - Funnel plots (for tests/strategies with $\geq 10$ studies available).....                                                                        | 147 |
| References.....                                                                                                                                              | 155 |

**Table S1 - Search terms**

Pubmed

|                                         |                                                                                                                                                                                                                                                                                                                                                                                                                                                                                                                            |
|-----------------------------------------|----------------------------------------------------------------------------------------------------------------------------------------------------------------------------------------------------------------------------------------------------------------------------------------------------------------------------------------------------------------------------------------------------------------------------------------------------------------------------------------------------------------------------|
| #1.                                     | "HIV Infections" [MeSH] OR "HIV"[MeSH] OR "hiv"[tw] OR hiv infect*[tw] OR "human immunodeficiency virus"[tw] OR "human immunodeficiency virus"[tw] OR "human immuno-deficiency virus"[tw] OR "human immune-deficiency virus"[tw] OR ((human immun*) AND ("deficiency virus"[tw])) OR "acquired immunodeficiency syndrome"[tw] OR "acquired immunodeficiency syndrome"[tw] OR "acquired immuno-deficiency syndrome"[tw] OR "acquired immune-deficiency syndrome"[tw] OR ((acquired immun*) AND ("deficiency syndrome"[tw])) |
| #2.                                     | "Tuberculosis"[Mesh] OR tuberculosis [TW] OR "Mycobacterium tuberculosis"[Mesh] OR TB [Ti]                                                                                                                                                                                                                                                                                                                                                                                                                                 |
| #3                                      | Screening* OR algorithm* OR "case finding" [TIAB] OR "case findings" [TIAB] OR sensitivit* OR specificit* OR predictor* OR "Sensitivity and Specificity"[MeSH Terms] OR "Tuberculosis/diagnosis"[Mesh] OR "Mass Screening"[Mesh:NoExp]                                                                                                                                                                                                                                                                                     |
| #4.                                     | ("animals"[MeSH Terms] NOT ( "humans"[MeSH Terms] AND "animals"[MeSH Terms] )) OR case reports[Publication Type]                                                                                                                                                                                                                                                                                                                                                                                                           |
| #5                                      | #1 AND #2 AND #3 NOT #4                                                                                                                                                                                                                                                                                                                                                                                                                                                                                                    |
| Limit: publication date from 2011/01/01 |                                                                                                                                                                                                                                                                                                                                                                                                                                                                                                                            |

Embase

|    |                                                                                                                                                                                                                                                                                                                                                                                                                                                               |
|----|---------------------------------------------------------------------------------------------------------------------------------------------------------------------------------------------------------------------------------------------------------------------------------------------------------------------------------------------------------------------------------------------------------------------------------------------------------------|
| #1 | 'human immunodeficiency virus infection'/exp OR 'human immunodeficiency virus'/exp OR 'hiv':ti,ab OR 'human immunodeficiency virus':ti,ab OR 'human immuno-deficiency virus':ti,ab OR 'human immunodeficiency virus':ti,ab OR 'human immune-deficiency virus':ti,ab OR 'acquired immune-deficiency syndrome':ti,ab OR 'acquired immunodeficiency syndrome':ti,ab OR 'acquired immunodeficiency syndrome':ti,ab OR 'acquired immuno-deficiency syndrome':ti,ab |
| #2 | 'tuberculosis'/exp OR 'tuberculosis':ab,ti OR 'TB':ti OR 'Mycobacterium tuberculosis'/exp                                                                                                                                                                                                                                                                                                                                                                     |
| #3 | 'Screen':ti,ab OR 'Screening':ti,ab OR 'algorithm':ti,ab OR 'case finding':ti,ab OR 'case findings':ti,ab OR sensitivit*:ti,ab OR specificit*:ti,ab OR predictor*:ti,ab OR 'sensitivity and specificity'/exp OR 'case finding'/exp OR 'Mass Screening'/exp OR 'screening'/exp                                                                                                                                                                                 |
| #4 | ([animals]/lim NOT [humans]/lim)                                                                                                                                                                                                                                                                                                                                                                                                                              |
| #5 | #1 AND #2 AND #3 NOT #4 AND [2011-]/py                                                                                                                                                                                                                                                                                                                                                                                                                        |

Cochrane

|                                    |                                                                                                                                                                                                                                                                                                                                                                                                                                                                          |
|------------------------------------|--------------------------------------------------------------------------------------------------------------------------------------------------------------------------------------------------------------------------------------------------------------------------------------------------------------------------------------------------------------------------------------------------------------------------------------------------------------------------|
| #1.                                | "HIV Infections" [MeSH] OR "HIV"[MeSH] OR hiv OR hiv infect* OR "human immunodeficiency virus" OR "human immunodeficiency virus" OR "human immuno-deficiency virus" OR "human immune-deficiency virus" OR ((human immun*) AND ("deficiency virus")) OR "acquired immunodeficiency syndrome" OR "acquired immunodeficiency syndrome" OR "acquired immuno-deficiency syndrome" OR "acquired immune-deficiency syndrome" OR ((acquired immun*) AND ("deficiency syndrome")) |
| #2.                                | "Tuberculosis"[Mesh] OR tuberculosis OR "Mycobacterium tuberculosis"[Mesh]                                                                                                                                                                                                                                                                                                                                                                                               |
| #3                                 | Screening* OR algorithm* OR "case finding" OR "case findings" OR sensitivit* OR specificit* OR predictor* OR "Sensitivity and Specificity"[MeSH Terms] OR "Tuberculosis/diagnosis"[Mesh] OR "Mass Screening"[Mesh:NoExp]                                                                                                                                                                                                                                                 |
| #4.                                | ("animals"[MeSH Terms] NOT ( "humans"[MeSH Terms] AND "animals"[MeSH Terms] )) OR case reports[Mesh]                                                                                                                                                                                                                                                                                                                                                                     |
| #5                                 | #1 AND #2 AND #3 NOT #4                                                                                                                                                                                                                                                                                                                                                                                                                                                  |
| Limit: publication year from 2011- |                                                                                                                                                                                                                                                                                                                                                                                                                                                                          |

**Table S2 - Variables sought**

| <b>Variable</b>                        | <b>Description</b>                                                                                 |
|----------------------------------------|----------------------------------------------------------------------------------------------------|
| country                                | country where the study took place, or if multisite, country individual patient was recruited from |
| clinical setting                       | from {inpatient, outpatient, other, NA}                                                            |
| age                                    | patient's age in years                                                                             |
| sex                                    | patient's sex {female, male, NA}                                                                   |
| hiv status                             | from {positive, negative, NA}                                                                      |
| art status                             | from {on art, not on art, NA}                                                                      |
| history of tuberculosis                | from {history of tuberculosis, no history of tuberculosis, NA}                                     |
| current smoking status                 | from {currently smoking, not currently smoking, NA}                                                |
| pregnancy status                       | from {pregnant, not pregnant, NA}                                                                  |
| tuberculosis treatment status          | from {currently on tuberculosis treatment, not currently on tuberculosis treatment, NA}            |
| current ipt status                     | from {yes, no, NA}                                                                                 |
| current cough                          | from {yes, no, NA}                                                                                 |
| cough (more than 2 weeks)              | from {yes, no, NA}                                                                                 |
| fever                                  | from {yes, no, NA}                                                                                 |
| weight loss                            | from {yes, no, NA}                                                                                 |
| night sweats                           | from {yes, no, NA}                                                                                 |
| w4ss                                   | number of w4ss symptoms {0, 1, 2, 3, 4, NA}                                                        |
| body mass index                        | numerical value (weight/height <sup>2</sup> )                                                      |
| lymphadenopathy                        | from {yes, no, NA}                                                                                 |
| cd4 count                              | numerical value (in cells/ $\mu$ L)                                                                |
| c-reactive protein level               | numerical value (in mg/L)                                                                          |
| haemoglobin                            | numerical value (in g/dl)                                                                          |
| chest x-ray suggestive of tuberculosis | from {yes, no, NA}                                                                                 |
| chest x-ray abnormal                   | from {yes, no, NA}                                                                                 |
| sputum xpert result                    | {positive, negative, NA}, indeterminate = negative                                                 |
| sputum xpert ultra result              | {positive, negative, NA}, indeterminate = negative                                                 |
| sputum culture result                  | {positive, negative, NA}, contaminated culture = negative                                          |
| non-sputum xpert result                | {positive, negative, NA}, indeterminate = negative                                                 |
| non-sputum xpert ultra result          | {positive, negative, NA}, indeterminate = negative                                                 |
| non-sputum culture result              | {positive, negative, NA}, contaminated culture = negative                                          |

Definition of abbreviations: ART = antiretroviral therapy, IPT = Isoniazid preventive therapy, W4SS = WHO four-symptom screen

**Table S3 - Study-level characteristics**

| Author, year                      | Country        | Study period | Study population                                                                            | Study setting                                               | Exclusion criteria                                                            | Sputum culture                                       | Sputum Xpert                                                                            | Non-sputum culture/Xpert                    | Liquid or solid culture |
|-----------------------------------|----------------|--------------|---------------------------------------------------------------------------------------------|-------------------------------------------------------------|-------------------------------------------------------------------------------|------------------------------------------------------|-----------------------------------------------------------------------------------------|---------------------------------------------|-------------------------|
| Abed Al-Darraj, 2013 <sup>1</sup> | Malaysia       | 2012-2012    | PLHIV who are inmates                                                                       | 1 prison in Malaysia                                        | Receiving ATT, anticipated release within 24 hours                            | 2 spot samples                                       | 1 morning sample                                                                        | No                                          | Liquid                  |
| Affolabi, 2018 <sup>2</sup>       | Multi-country* | 2015-2018    | PLHIV of any age                                                                            | 3 HIV clinics                                               | On ATT for TB                                                                 | 1 spot and 1 early morning samples                   | 1 spot and 1 early morning samples                                                      | No                                          | Solid                   |
| Ahmad, 2014 <sup>3</sup>          | South Africa   | 2011-2012    | PLHIV aged ≥18 years                                                                        | 2 HIV clinics                                               | On ATT currently or awaiting results of TB investigations                     | 1 morning sample                                     | No                                                                                      | No                                          | Liquid                  |
| Balcha, 2014 <sup>4</sup>         | Ethiopia       | 2011-2013    | ART-naive PLHIV aged ≥18 years with WHO stage 4 or CD4 cell count <350 per µL               | 5 public health centers                                     | Unable to submit ≥ 1 pair of sputum samples, previous ART, ATT >2 weeks       | 1 morning sample                                     | 1 morning sample                                                                        | FNA sample of LN >1cm for culture and Xpert | Liquid                  |
| Bjerrum, 2015 <sup>5</sup>        | Ghana          | 2013-2014    | ART-naive PLHIV aged ≥18 years with WHO stage 3/4 or CD4 cell count ≤350 per µL or pregnant | 1 public hospital (out- and inpatient departments)          | On ATT > 2 days <3 months before or unable to produce sputum or urine samples | 1 spot and 1 early morning samples                   | 1 or 2 samples                                                                          | No                                          | Both                    |
| Gersh, 2018 <sup>6</sup>          | Kenya          | 2017-2018    | PLHIV aged ≥18 and ≤70 years                                                                | 2 HIV clinics                                               | Currently on treatment for TB or LTBI, pregnant, incarcerated                 | 1 spot sample, induced or early morning if necessary | 1 spot sample, induced or early morning if necessary                                    | No                                          | Liquid                  |
| Hanifa, 2012 <sup>7</sup>         | South Africa   | 2007-2008    | ART-naive PLHIV aged >17 years with WHO stage 4 or CD4 cell count ≤200 per µL               | 1 public HIV clinic                                         | On ATT currently or <3 months before                                          | 2 spot samples                                       | No                                                                                      | No                                          | Liquid                  |
| Heidebrecht, 2016 <sup>8</sup>    | South Africa   | 2013-2013    | Inpatient PLHIV admitted to medical wards                                                   | 1 hospital (5 medical wards)                                | ≥3 doses of ATT                                                               | 1 spot sample                                        | 1 spot sample                                                                           | No                                          | Both                    |
| Hoffman, 2013 <sup>9</sup>        | South Africa   | 2010-2011    | Pregnant PLHIV aged ≥18 years                                                               | 16 PHC centre prenatal clinics and 1 regional hospital      | -                                                                             | 1 spot sample                                        | No                                                                                      | No                                          | Liquid                  |
| Kempker, 2019 <sup>10</sup>       | Georgia        | 2014-2015    | Newly diagnosed ART-naive PLHIV aged ≥18 years                                              | 1 national reference center for HIV diagnosis and treatment | ATT <90 days before                                                           | 1 spot and 1 early morning samples                   | 1 spot and 1 early morning samples for 1 test                                           | No                                          | Solid                   |
| Kerkhoff, 2013 <sup>11</sup>      | South Africa   | 2010-2011    | ART-naive PLHIV aged ≥18 years                                                              | 1 community-based ART clinic                                | No current TB diagnosis                                                       | 2 spot samples with ≥ 1 induced                      | 2 spot samples with ≥ 1 induced                                                         | No                                          | Liquid                  |
| Kufa, 2012 <sup>12</sup>          | South Africa   | 2009-2010    | PLHIV aged ≥18 years                                                                        | 1 HIV clinic in PHC centre                                  | On TB treatment, completed TB treatment <3 months before, dialysis, prisoners | 2 spot samples, induced if necessary                 | No                                                                                      | Blood culture                               | Liquid                  |
| LaCourse, 2016 <sup>13</sup>      | Kenya          | 2013-2014    | Pregnant PLHIV aged ≥16 years                                                               | 2 antenatal care clinics                                    | On ATT for TB or LTBI, or were treated for TB or LTBI <1 year before          | 1 spot and 1 early morning samples                   | 1 spot sample, on 2nd sample if no spot sample or if 2nd sample culture positive for TB | No                                          | Liquid                  |
| Mbu, 2018 <sup>14</sup>           | Cameroon       | 2012-2013    | ART-naive PLHIV aged ≥18 years                                                              | 1 regional hospital (HIV testing and ART treatment center)  | First diagnosis of HIV <1 month before, currently on ATT                      | 1 spot and 1 early morning samples                   | No                                                                                      | No                                          | Both                    |
| Modi, 2016 <sup>15</sup>          | Kenya          | 2011-2012    | ART-naive PLHIV aged ≥7 years                                                               | 15 public HIV care and treatment clinics                    | Receipt of any HIV-related care <2 years before, ATT <1 year before           | 1 spot and 1 early morning samples                   | 1 spot and 1 early morning samples                                                      | No                                          | Liquid                  |

| Author, year                  | Country         | Study period | Study population                                               | Study setting                 | Exclusion criteria                                                                                               | Sputum culture                           | Sputum Xpert                                   | Non-sputum culture/Xpert | Liquid or solid culture |
|-------------------------------|-----------------|--------------|----------------------------------------------------------------|-------------------------------|------------------------------------------------------------------------------------------------------------------|------------------------------------------|------------------------------------------------|--------------------------|-------------------------|
| Nguyen, 2016 <sup>16</sup>    | Vietnam         | 2009-2010    | PLHIV aged ≥15 years                                           | 1 outpatient urban HIV clinic | Screened for TB in past month, received TB treatment <1 year before                                              | 1 spot and 1 early morning samples       | No                                             | No                       | Solid                   |
| Rangaka, 2012 <sup>17</sup>   | South Africa    | 2007-2009    | PLHIV aged ≥18 years                                           | 1 HIV clinic                  | -                                                                                                                | 1 spot sample, induced if necessary      | No                                             | No                       | Both                    |
| Reeve, 2019 <sup>18</sup>     | South Africa    | 2017-2020    | ART-naive PLHIV aged ≥18 years                                 | 1 outpatient clinic           | On ATT <60 days before or has unknown treatment status                                                           | 2 spot samples, majority induced         | 1 spot sample and Xpert Ultra on 1 spot sample | Urine Xpert Ultra        | Liquid                  |
| Shapiro, 2018 <sup>19</sup>   | South Africa    | 2014-2015    | ART-naive PLHIV aged ≥18 years                                 | 1 urban HIV clinic            | -                                                                                                                | 2 samples, induced if necessary          | No                                             | No                       | Liquid                  |
| Swindells, 2013 <sup>20</sup> | Multi-country** | 2010-2010    | ART-naive PLHIV aged ≥13 years                                 | 11 outpatient clinics         | ART or diagnosis of TB <90 days before and current or recent receipt of ATT                                      | 3 spot samples, induced if necessary     | No                                             | No                       | Both                    |
| Thit, 2017 <sup>21</sup>      | Myanmar         | 2015-2015    | Inpatient or outpatient PLHIV                                  | 1 tertiary referral hospital  | -                                                                                                                | 1 spot sample                            | 1 spot sample                                  | No                       | Solid                   |
| Yoon, 2018 <sup>22</sup>      | Uganda          | 2013-2016    | ART-naive PLHIV aged ≥18 years with CD4 cell count ≤350 per µL | 2 HIV clinics in Kampala      | Diagnosis of active tuberculosis, taking ATT (anti-TB or TB preventive therapy, fluoroquinolones) ≤3 days before | 2 spot samples, 2nd induced if necessary | 1 spot sample, induced if necessary            | No                       | Both                    |

\*Benin, Guinea, and Senegal

\*\*Botswana, Malawi, South Africa, Zimbabwe, India, Brazil and Peru

Definition of abbreviations: ART = antiretroviral therapy, ATT = anti-tuberculosis treatment, FNA = fine needle aspiration, LN = Lymph node, LTBI = latent tuberculosis infection, PHC = primary health care, PLHIV = people living with HIV, TB = tuberculosis

Table S4 - Percentage of missing data for each variable by study†§

| Variable                    | Affolabi | Ahmad | Al_Darraji | Balcha | Bjerrum | Gersh | Hanifa | Hoffmann | Kemper | Kerkhoff | Kufa | LaCourse | Mbu | Modi | Nguyen | Rangaka | Reeve | Shapiro | Swindells | Thit | Yoon |
|-----------------------------|----------|-------|------------|--------|---------|-------|--------|----------|--------|----------|------|----------|-----|------|--------|---------|-------|---------|-----------|------|------|
| Clinical setting            | 0        | 0     | 0          | 0      | 0       | 0     | 0      | 0        | 0      | 0        | 0    | 0        | 0   | 0    | 0      | 0       | 0     | 0       | 0         | 0    | 0    |
| Age                         | 0        | 0     | 0          | 0      | 0       | 0     | 0      | 0        | 0      | 0        | 0    | 0        | 0   | 0    | 0      | 0       | 0     | 0       | 0         | 0    | 0    |
| Sex                         | 0        | 0     | 0          | 0      | 0       | 0     | 0      | 0        | 0      | 0        | 0    | 0        | 0   | 0    | 0      | 0       | 0     | 0       | 0         | 0    | 0    |
| ART status                  | 0        | 0     | 0          | 0      | 0       | 1     | 0      | 0        | 0      | 0        | 0    | 0        | 0   | 0    | 0      | 0       | 0     | 0       | 0         | 0    | 0    |
| History of tuberculosis     | 100      | 0     | 0          | 1      | 1       | 1     | 0      | 0        | 0      | 0        | 0    | 6        | 100 | 100  | 0      | 0       | 0     | 0       | 0         | 0    | 0    |
| Currently smoking           | 0        | 100   | 0          | 0      | 24      | 0     | 0      | 0        | 0      | 0        | 100  | 100      | 100 | 100  | 1      | 100     | 0     | 0       | 100       | 0    | 8    |
| Pregnancy*                  | 100      | 100   | 100        | 100    | 0       | 0     | 100    | 0        | 100    | 1        | 0    | 0        | 100 | 4    | 0      | 100     | 100   | 100     | 0         | 100  | 0    |
| Currently on IPT            | 1        | 0     | 100        | 0      | 100     | 0     | 100    | 100      | 100    | 100      | 100  | 0        | 100 | 100  | 100    | 100     | 100   | 100     | 0         | 0    | 0    |
| W4SS**                      | 0        | 0     | 0          | 0      | 0       | 0     | 0      | 0        | 0      | 0        | 0    | 0        | 0   | 2    | 0      | 0       | 0     | 0       | 0         | 0    | 0    |
| Cough                       | 0        | 0     | 0          | 0      | 0       | 0     | 0      | 0        | 0      | 0        | 0    | 0        | 0   | 5    | 0      | 0       | 0     | 0       | 0         | 0    | 0    |
| Fever                       | 0        | 0     | 0          | 0      | 2       | 0     | 0      | 0        | 0      | 0        | 0    | 0        | 0   | 4    | 0      | 0       | 0     | 0       | 0         | 0    | 0    |
| Weight loss                 | 0        | 0     | 0          | 0      | 1       | 0     | 0      | 0        | 0      | 0        | 0    | 0        | 0   | 3    | 0      | 0       | 0     | 0       | 4         | 0    | 0    |
| Night sweats                | 0        | 0     | 0          | 0      | 1       | 0     | 0      | 0        | 0      | 0        | 0    | 0        | 0   | 4    | 0      | 0       | 0     | 0       | 0         | 0    | 0    |
| Cough >=2 weeks             | 100      | 100   | 0          | 100    | 0       | 0     | 0      | 0        | 0      | 0        | 5    | 0        | 0   | 4    | 0      | 0       | 0     | 0       | 0         | 100  | 0    |
| Body mass index             | 1        | 6     | 0          | 1      | 1       | 1     | 1      | 100      | 2      | 0        | 3    | 0        | 100 | 13   | 100    | 0       | 0     | 0       | 1         | 0    | 0    |
| Lymphadenopathy             | 100      | 100   | 100        | 0      | 0       | 100   | 100    | 100      | 100    | 100      | 100  | 100      | 100 | 100  | 100    | 100     | 100   | 100     | 0         | 0    | 100  |
| CD4 cell count              | 3        | 0     | 0          | 1      | 2       | 18    | 1      | 2        | 0      | 0        | 0    | 17       | 0   | 7    | 0      | 0       | 10    | 3       | 0         | 0    | 0    |
| CRP                         | 100      | 100   | 100        | 100    | 100     | 1     | 100    | 100      | 100    | 4        | 100  | 100      | 100 | 100  | 100    | 100     | 8     | 0       | 100       | 100  | 0    |
| Hb                          | 100      | 100   | 100        | 6      | 9       | 5     | 1      | 8        | 100    | 6        | 0    | 100      | 100 | 100  | 100    | 100     | 100   | 100     | 0         | 21   | 100  |
| CXR (any abnormality)       | 3        | 3     | 100        | 100    | 100     | 100   | 1      | 100      | 100    | 9        | 7    | 100      | 100 | 23   | 100    | 100     | 100   | 100     | 4         | 7    | 100  |
| CXR (suggests tuberculosis) | 3        | 3     | 100        | 100    | 100     | 100   | 1      | 100      | 100    | 9        | 8    | 100      | 100 | 23   | 0      | 100     | 100   | 100     | 4         | 100  | 100  |
| Total Xpert***              | 1        | 100   | 0          | 1      | 65      | 1     | 100    | 100      | 1      | 0        | 100  | 1        | 100 | 0    | 100    | 100     | 6     | 100     | 100       | 0    | 0    |
| Total culture               | 1        | 0     | 0          | 0      | 0       | 0     | 0      | 0        | 1      | 0        | 0    | 0        | 0   | 0    | 0      | 0       | 1     | 0       | 0         | 0    | 0    |
| Total (culture±Xpert)       | 0        | 0     | 0          | 0      | 0       | 0     | 0      | 0        | 0      | 0        | 0    | 0        | 0   | 0    | 0      | 0       | 0     | 0       | 0         | 0    | 0    |

†<5% missing (green), 5-95% missing (yellow), and >95% missing (red)

§Some datasets received in which some participants with missing data were already excluded

\*Pregnancy could be ascertained by testing or interview; missing percentages based on available data for females in the study

\*\*Regarded as missing only if a subject had all four symptoms missing

\*\*\*Study by Bjerrum et al has a high missing value because Xpert only became available after study enrollment began

Definition of abbreviations: ART = antiretroviral therapy, CRP = C-reactive protein, CXR = chest X-ray, Hb = haemoglobin, IPT = Isoniazid preventive therapy, W4SS = WHO four-symptom screen

**Table S5 - Summary of main characteristics for participants overall and by each study**

| Variable                                   | All           | Ahmad         | Al Darraji    | Balcha        | Bjerrum      | Gersh         | Hanifa       | Hoffmann      | Kemper       | Kerkhoff     | Kufa          |
|--------------------------------------------|---------------|---------------|---------------|---------------|--------------|---------------|--------------|---------------|--------------|--------------|---------------|
| <b>Participants</b>                        | 15666 (100)   | 611 (3.9)     | 125 (0.8)     | 812 (5.2)     | 395 (2.5)    | 387 (2.5)     | 351 (2.2)    | 1404 (9)      | 103 (0.7)    | 523 (3.3)    | 415 (2.6)     |
| <b>Clinical setting</b>                    |               |               |               |               |              |               |              |               |              |              |               |
| <b>Outpatient</b>                          | 15541 (99.2)  | 611 (100)     | 0 (0)         | 812 (100)     | 395 (100)    | 387 (100)     | 351 (100)    | 1404 (100)    | 103 (100)    | 523 (100)    | 415 (100)     |
| <b>Other setting*</b>                      | 125 (0.8)     | 0 (0)         | 125 (100)     | 0 (0)         | 0 (0)        | 0 (0)         | 0 (0)        | 0 (0)         | 0 (0)        | 0 (0)        | 0 (0)         |
| <b>N</b>                                   | 15666         | 611           | 125           | 812           | 395          | 387           | 351          | 1404          | 103          | 523          | 415           |
| <b>Age (years)</b>                         | 34 (28-42)    | 37 (31-45)    | 37 (33-42)    | 32 (28-40)    | 38 (31-45)   | 37 (31-45)    | 38 (32-46)   | 27 (23-32)    | 42 (35-49)   | 34 (28-41)   | 37 (31-44)    |
| <b>N</b>                                   | 15666         | 611           | 125           | 812           | 395          | 387           | 351          | 1404          | 103          | 523          | 415           |
| <b>Female</b>                              | 10388 (66.3)  | 461 (75.5)    | 12 (9.6)      | 476 (58.6)    | 264 (66.8)   | 225 (58.1)    | 232 (66.1)   | 1404 (100.0)  | 26 (25.2)    | 335 (64.1)   | 274 (66.0)    |
| <b>N</b>                                   | 15666         | 611           | 125           | 812           | 395          | 387           | 351          | 1404          | 103          | 523          | 415           |
| <b>On ART</b>                              | 4347 (27.8)   | 423 (69.2)    | 19 (15.2)     | 0 (0.0)       | 0 (0.0)      | 383 (99.7)    | 0 (0.0)      | 2 (0.1)       | 0 (0.0)      | 0 (0.0)      | 210 (50.6)    |
| <b>N</b>                                   | 15663         | 611           | 125           | 812           | 395          | 384           | 351          | 1404          | 103          | 523          | 415           |
| <b>CD4 count (cells/<math>\mu</math>L)</b> | 269 (142-439) | 313 (178-472) | 338 (150-492) | 208 (117-320) | 140 (45-268) | 404 (276-558) | 119 (72-168) | 395 (271-533) | 120 (26-272) | 169 (96-232) | 216 (108-350) |
| <b>N</b>                                   | 15281         | 611           | 125           | 807           | 387          | 317           | 349          | 1377          | 103          | 521          | 415           |
| <b>History of tuberculosis</b>             | 1955 (17.5)   | 235 (38.5)    | 36 (28.8)     | 51 (6.4)      | 23 (5.9)     | 58 (15.1)     | 99 (28.2)    | 110 (7.9)     | 3 (2.9)      | 141 (27.0)   | 109 (26.3)    |
| <b>N</b>                                   | 11148         | 611           | 125           | 800           | 392          | 384           | 351          | 1401          | 103          | 523          | 415           |
| <b>Current Smoker</b>                      | 1191 (11.6)   | -             | 117 (93.6)    | 35 (4.3)      | 11 (3.7)     | 11 (2.8)      | 40 (11.4)    | 40 (2.8)      | 64 (62.1)    | 122 (23.4)   | -             |
| <b>N</b>                                   | 10301         |               | 125           | 812           | 299          | 387           | 351          | 1404          | 103          | 522          |               |
| <b>Pregnant</b>                            | 1938 (35.1)   | -             | -             | -             | 24 (6.1)     | 0 (0.0)       | -            | 1404 (100.0)  | -            | 20 (3.8)     | 11 (2.7)      |
| <b>N</b>                                   | 5519          |               |               |               | 395          | 387           |              | 1404          |              | 521          | 415           |
| <b>On IPT</b>                              | 41 (0.5)      | 3 (0.5)       | -             | 19 (2.3)      | -            | 0 (0.0)       | -            | -             | -            | -            | -             |
| <b>N</b>                                   | 7593          | 609           |               | 810           |              | 387           |              |               |              |              |               |
| <b>W4SS</b>                                | 8028 (51.3)   | 331 (54.2)    | 85 (68.0)     | 651 (80.2)    | 359 (91.1)   | 47 (12.1)     | 331 (94.3)   | 227 (16.2)    | 62 (60.2)    | 452 (86.4)   | 355 (85.5)    |
| <b>N</b>                                   | 15652         | 611           | 125           | 812           | 394          | 387           | 351          | 1404          | 103          | 523          | 415           |
| <b>Cough</b>                               | 4629 (29.6)   | 223 (36.5)    | 62 (49.6)     | 326 (40.2)    | 172 (43.7)   | 36 (9.3)      | 161 (45.9)   | 110 (7.8)     | 29 (28.2)    | 260 (49.7)   | 201 (48.4)    |
| <b>N</b>                                   | 15623         | 611           | 125           | 811           | 394          | 387           | 351          | 1404          | 103          | 523          | 415           |
| <b>Fever</b>                               | 3391 (21.7)   | 57 (9.3)      | 37 (29.6)     | 389 (48.0)    | 189 (48.6)   | 5 (1.3)       | 100 (28.5)   | 52 (3.7)      | 55 (53.4)    | 152 (29.1)   | 163 (39.3)    |
| <b>N</b>                                   | 15631         | 611           | 125           | 811           | 389          | 387           | 351          | 1404          | 103          | 523          | 415           |
| <b>Weight loss</b>                         | 5575 (35.7)   | 170 (27.8)    | 19 (15.2)     | 514 (63.6)    | 323 (82.2)   | 9 (2.3)       | 316 (90.3)   | 103 (7.3)     | 43 (41.7)    | 355 (68.0)   | 254 (61.2)    |
| <b>N</b>                                   | 15602         | 611           | 125           | 808           | 393          | 387           | 350          | 1404          | 103          | 522          | 415           |
| <b>Night sweats</b>                        | 3270 (20.9)   | 144 (23.6)    | 30 (24.0)     | 396 (48.8)    | 131 (33.5)   | 18 (4.7)      | 147 (41.9)   | 49 (3.5)      | 26 (25.2)    | 210 (40.2)   | 190 (45.8)    |
| <b>N</b>                                   | 15630         | 611           | 125           | 811           | 391          | 387           | 351          | 1404          | 103          | 523          | 415           |
| <b>Cough &gt;= 2 weeks</b>                 | 2205 (20.2)   | -             | 14 (11.2)     | -             | 130 (33.0)   | 8 (2.1)       | 103 (29.3)   | 54 (3.8)      | 28 (27.2)    | 107 (20.5)   | 151 (38.1)    |
| <b>N</b>                                   | 10919         |               | 125           |               | 394          | 387           | 351          | 1404          | 103          | 523          | 396           |
| <b>Lymphadenopathy</b>                     | 374 (15.6)    | -             | -             | 28 (3.5)      | 76 (19.2)    | -             | -            | -             | -            | -            | -             |
| <b>N</b>                                   | 2394          |               |               | 810           | 395          |               |              |               |              |              |               |
| <b>CXR (suggests tuberculosis)</b>         | 1296 (21.0)   | 265 (44.8)    | -             | -             | -            | -             | 177 (50.9)   | -             | -            | 196 (41.3)   | 72 (18.8)     |
| <b>N</b>                                   | 6177          | 591           |               |               |              |               | 348          |               |              | 475          | 383           |
| <b>CXR (any abnormality)</b>               | 2158 (34.7)   | 354 (59.9)    | -             | -             | -            | -             | 222 (63.8)   | -             | -            | 239 (50.1)   | 145 (37.8)    |
| <b>N</b>                                   | 6222          | 591           |               |               |              |               | 348          |               |              | 477          | 384           |
| <b>Total Xpert positive**</b>              | 616 (7.1)     | -             | 8 (6.4)       | 96 (11.9)     | 21 (15.1)    | 4 (1.0)       | -            | -             | 12 (11.8)    | 70 (13.4)    | -             |
| <b>N</b>                                   | 8625          |               | 125           | 804           | 139          | 384           |              |               | 102          | 523          |               |



| Variable                                  | All         | Ahmad      | Al Darraji | Balcha     | Bjerrum    | Gersh      | Hanifa     | Hoffmann   | Kemper     | Kerkhoff   | Kufa       |
|-------------------------------------------|-------------|------------|------------|------------|------------|------------|------------|------------|------------|------------|------------|
| <b>Total culture positive***</b>          | 1347 (8.6)  | 57 (9.3)   | 15 (12.0)  | 124 (15.3) | 37 (9.4)   | 5 (1.3)    | 64 (18.2)  | 35 (2.5)   | 12 (11.8)  | 89 (17.0)  | 24 (5.8)   |
| <b>N</b>                                  | 15611       | 611        | 125        | 809        | 395        | 387        | 351        | 1404       | 102        | 522        | 415        |
| <b>Total Xpert &amp; culture positive</b> | 1453 (9.3)  | 57 (9.3)   | 15 (12.0)  | 137 (16.9) | 40 (10.1)  | 8 (2.1)    | 64 (18.2)  | 35 (2.5)   | 15 (14.6)  | 95 (18.2)  | 24 (5.8)   |
| <b>N</b>                                  | 15666       | 611        | 125        | 812        | 395        | 387        | 351        | 1404       | 103        | 523        | 415        |
| <b>BMI (kg/m<sup>2</sup>)</b>             | 22 (19-26)  | 24 (21-28) | 22 (21-25) | 19 (17-21) | 20 (18-23) | 22 (20-25) | 20 (18-24) | -          | 22 (21-24) | 23 (21-27) | 24 (21-28) |
| <b>N</b>                                  | 12704       | 575        | 125        | 801        | 390        | 383        | 349        | -          | 101        | 522        | 403        |
| <b>CRP (mg/L)</b>                         | 4 (2-21)    | -          | -          | -          | -          | 1 (1-4)    | -          | -          | -          | 10 (2-32)  | -          |
| <b>N</b>                                  | 3582        | -          | -          | -          | -          | 385        | -          | -          | -          | 502        | -          |
| <b>CRP (&gt;=10 mg/L)</b>                 | 1259 (35.1) | -          | -          | -          | -          | 39 (10.1)  | -          | -          | -          | 251 (50.0) | -          |
| <b>N</b>                                  | 3582        | -          | -          | -          | -          | 385        | -          | -          | -          | 502        | -          |
| <b>Hb (g/dL)</b>                          | 12 (10-13)  | -          | -          | 12 (10-13) | 10 (9-11)  | 13 (11-14) | 11 (10-13) | 11 (10-12) | -          | 12 (11-13) | 12 (11-14) |
| <b>N</b>                                  | 5118        | -          | -          | 762        | 360        | 366        | 348        | 1287       | -          | 490        | 415        |
| <b>Hb (&lt;10 g/dL)</b>                   | 1093 (21.4) | -          | -          | 165 (21.7) | 184 (51.1) | 53 (14.5)  | 91 (26.1)  | 204 (15.9) | -          | 86 (17.6)  | 64 (15.4)  |
| <b>N</b>                                  | 5118        | -          | -          | 762        | 360        | 366        | 348        | 1287       | -          | 490        | 415        |

†Data are median (25th-75th percentiles) or count (%)

\*One study among a prison population

\*\*Sputum and/or non-sputum Xpert result

\*\*\*Sputum and/or non-sputum culture result

Definition of abbreviations: ART = antiretroviral therapy, BMI = body mass index, CRP = C-reactive protein, CXR = chest X-ray, Hb = haemoglobin, IPT = Isoniazid preventive therapy, W4SS = WHO four-symptom screen

| Variable                           | LaCourse      | Mbu           | Affolabi      | Modi          | Nguyen        | Rangaka       | Reeve         | Shapiro       | Swindells     | Thit          | Yoon         |
|------------------------------------|---------------|---------------|---------------|---------------|---------------|---------------|---------------|---------------|---------------|---------------|--------------|
| <b>Participants</b>                | 292 (1.9)     | 940 (6)       | 2805 (17.9)   | 731 (4.7)     | 397 (2.5)     | 1429 (9.1)    | 807 (5.2)     | 425 (2.7)     | 726 (4.6)     | 463 (3)       | 1525 (9.7)   |
| <b>Clinical setting</b>            |               |               |               |               |               |               |               |               |               |               |              |
| <b>Outpatient</b>                  | 292 (100)     | 940 (100)     | 2805 (100)    | 731 (100)     | 397 (100)     | 1429 (100)    | 807 (100)     | 425 (100)     | 726 (100)     | 463 (100)     | 1525 (100)   |
| <b>Other setting*</b>              | 0 (0)         | 0 (0)         | 0 (0)         | 0 (0)         | 0 (0)         | 0 (0)         | 0 (0)         | 0 (0)         | 0 (0)         | 0 (0)         | 0 (0)        |
| <b>N</b>                           | 292           | 940           | 2805          | 731           | 397           | 1429          | 807           | 425           | 726           | 463           | 1525         |
| <b>Age (years)</b>                 | 25 (22-30)    | 35 (28-42)    | 40 (33-49)    | 30 (24-39)    | 30 (27-34)    | 34 (30-40)    | 32 (26-39)    | 32 (27-39)    | 33 (28-39)    | 34 (30-40)    | 33 (27-40)   |
| <b>N</b>                           | 292           | 940           | 2805          | 731           | 397           | 1429          | 807           | 425           | 726           | 463           | 1525         |
| <b>Female</b>                      | 292 (100.0)   | 641 (68.2)    | 1878 (67.0)   | 481 (65.8)    | 113 (28.5)    | 1053 (73.7)   | 478 (59.2)    | 248 (58.4)    | 458 (63.1)    | 231 (49.9)    | 806 (52.9)   |
| <b>N</b>                           | 292           | 940           | 2805          | 731           | 397           | 1429          | 807           | 425           | 726           | 463           | 1525         |
| <b>On ART</b>                      | 159 (54.5)    | 0 (0.0)       | 1808 (64.5)   | 0 (0.0)       | 230 (57.9)    | 775 (54.2)    | 0 (0.0)       | 0 (0.0)       | 0 (0.0)       | 338 (73.0)    | 0 (0.0)      |
| <b>N</b>                           | 292           | 940           | 2805          | 731           | 397           | 1429          | 807           | 425           | 726           | 463           | 1525         |
| <b>CD4 count (cells/μL)</b>        | 437 (345-560) | 291 (116-496) | 376 (197-551) | 342 (168-512) | 336 (217-489) | 209 (145-331) | 306 (174-489) | 306 (176-468) | 273 (167-435) | 286 (145-466) | 160 (70-265) |
| <b>N</b>                           | 242           | 940           | 2731          | 683           | 397           | 1429          | 726           | 411           | 723           | 462           | 1525         |
| <b>History of tuberculosis</b>     | 25 (9.1)      | -             | -             | -             | 178 (44.8)    | 552 (38.6)    | 115 (14.3)    | 19 (4.5)      | 53 (7.3)      | 94 (20.3)     | 54 (3.5)     |
| <b>N</b>                           | 274           |               |               |               | 397           | 1429          | 806           | 425           | 725           | 463           | 1524         |
| <b>Current Smoker</b>              | -             | -             | 102 (3.6)     | -             | 42 (10.7)     | -             | 295 (36.6)    | 105 (24.8)    | -             | 137 (29.7)    | 70 (5.0)     |
| <b>N</b>                           |               |               | 2805          |               | 393           |               | 807           | 424           |               | 462           | 1407         |
| <b>Pregnant</b>                    | 292 (100.0)   | -             | -             | 134 (29.1)    | 0 (0.0)       | -             | -             | -             | 10 (1.4)      | -             | 43 (5.3)     |
| <b>N</b>                           | 292           |               |               | 461           | 113           |               |               |               | 726           |               | 805          |
| <b>On IPT</b>                      | 0 (0.0)       | -             | 7 (0.3)       | -             | -             | -             | -             | -             | 0 (0.0)       | 12 (2.6)      | 0 (0.0)      |
| <b>N</b>                           | 292           |               | 2781          |               |               |               |               |               | 726           | 463           | 1525         |
| <b>W4SS</b>                        | 57 (19.5)     | 812 (86.4)    | 780 (27.8)    | 366 (50.9)    | 147 (37.0)    | 206 (14.4)    | 442 (54.8)    | 279 (65.6)    | 481 (66.3)    | 223 (48.2)    | 1335 (87.5)  |
| <b>N</b>                           | 292           | 940           | 2805          | 719           | 397           | 1429          | 807           | 425           | 725           | 463           | 1525         |
| <b>Cough</b>                       | 44 (15.1)     | 448 (47.7)    | 567 (20.2)    | 171 (24.6)    | 105 (26.4)    | 125 (8.7)     | 249 (30.9)    | 191 (44.9)    | 311 (43.0)    | 74 (16.0)     | 764 (50.1)   |
| <b>N</b>                           | 292           | 940           | 2805          | 694           | 397           | 1429          | 807           | 425           | 723           | 462           | 1525         |
| <b>Fever</b>                       | 14 (4.8)      | 220 (23.4)    | 444 (15.8)    | 236 (33.5)    | 26 (6.5)      | 9 (0.6)       | 55 (6.8)      | 129 (30.4)    | 222 (30.7)    | 61 (13.2)     | 776 (50.9)   |
| <b>N</b>                           | 292           | 940           | 2805          | 705           | 397           | 1429          | 807           | 425           | 724           | 463           | 1525         |
| <b>Weight loss</b>                 | 3 (1.0)       | 592 (63.0)    | 395 (14.1)    | 241 (34.0)    | 79 (19.9)     | 112 (7.8)     | 334 (41.4)    | 146 (34.4)    | 265 (38.2)    | 193 (41.7)    | 1109 (72.7)  |
| <b>N</b>                           | 292           | 940           | 2805          | 708           | 397           | 1429          | 806           | 425           | 694           | 463           | 1525         |
| <b>Night sweats</b>                | 20 (6.8)      | 395 (42.0)    | 140 (5.0)     | 182 (26.0)    | 11 (2.8)      | 71 (5.0)      | 191 (23.7)    | 139 (32.7)    | 210 (29.0)    | 40 (8.6)      | 530 (34.8)   |
| <b>N</b>                           | 292           | 940           | 2805          | 701           | 397           | 1429          | 807           | 425           | 725           | 463           | 1525         |
| <b>Cough &gt;= 2 weeks</b>         | 14 (4.8)      | 228 (24.3)    | -             | 138 (19.7)    | 105 (26.4)    | 82 (5.7)      | 166 (20.6)    | 129 (30.5)    | 229 (31.6)    | -             | 519 (34.0)   |
| <b>N</b>                           | 292           | 940           |               | 699           | 397           | 1429          | 807           | 423           | 724           |               | 1525         |
| <b>Lymphadenopathy</b>             | -             | -             | -             | -             | -             | -             | -             | -             | 238 (32.8)    | 32 (6.9)      | -            |
| <b>N</b>                           |               |               |               |               |               |               |               |               | 726           | 463           |              |
| <b>CXR (suggests tuberculosis)</b> | -             | -             | 251 (9.2)     | 99 (17.6)     | 127 (32.0)    | -             | -             | -             | 109 (15.6)    | -             | -            |
| <b>N</b>                           |               |               | 2724          | 561           | 397           |               |               |               | 698           |               |              |
| <b>CXR (any abnormality)</b>       | -             | -             | 635 (23.3)    | 248 (43.8)    | -             | -             | -             | -             | 159 (22.8)    | 156 (36.1)    | -            |
| <b>N</b>                           |               |               | 2726          | 566           |               |               |               |               | 698           | 432           |              |
| <b>Total Xpert positive**</b>      | 4 (1.4)       | -             | 111 (4.0)     | 61 (8.4)      | -             | -             | 61 (8.0)      | -             | -             | 25 (5.4)      | 143 (9.4)    |
| <b>N</b>                           | 289           |               | 2781          | 728           |               |               | 762           |               |               | 463           | 1525         |
| <b>Total culture positive***</b>   | 7 (2.4)       | 131 (13.9)    | 85 (3.1)      | 75 (10.3)     | 28 (7.1)      | 126 (8.8)     | 93 (11.7)     | 42 (9.9)      | 56 (7.7)      | 10 (2.2)      | 232 (15.2)   |

| Variable                                  | LaCourse   | Mbu        | Affolabi   | Modi       | Nguyen   | Rangaka    | Reeve      | Shapiro    | Swindells  | Thit       | Yoon       |
|-------------------------------------------|------------|------------|------------|------------|----------|------------|------------|------------|------------|------------|------------|
| <b>N</b>                                  | 292        | 940        | 2766       | 731        | 397      | 1429       | 796        | 425        | 726        | 463        | 1525       |
| <b>Total Xpert &amp; culture positive</b> | 8 (2.7)    | 131 (13.9) | 118 (4.2)  | 82 (11.2)  | 28 (7.1) | 126 (8.8)  | 100 (12.4) | 42 (9.9)   | 56 (7.7)   | 30 (6.5)   | 242 (15.9) |
| <b>N</b>                                  | 292        | 940        | 2805       | 731        | 397      | 1429       | 807        | 425        | 726        | 463        | 1525       |
| <b>BMI (kg/m<sup>2</sup>)</b>             | 24 (22-26) | -          | 22 (19-25) | 21 (19-22) | -        | 25 (22-29) | 24 (21-29) | 24 (21-29) | 22 (20-26) | 21 (19-23) | 21 (19-24) |
| <b>N</b>                                  | 292        | -          | 2769       | 634        | -        | 1429       | 803        | 425        | 719        | 461        | 1523       |
| <b>CRP (mg/L)</b>                         | -          | -          | -          | -          | -        | -          | 6 (2-28)   | 4 (1-17)   | -          | -          | 4 (2-23)   |
| <b>N</b>                                  | -          | -          | -          | -          | -        | -          | 745        | 425        | -          | -          | 1525       |
| <b>CRP (&gt;=10 mg/L)</b>                 | -          | -          | -          | -          | -        | -          | 303 (40.7) | 140 (32.9) | -          | -          | 526 (34.5) |
| <b>N</b>                                  |            |            |            |            |          |            | 745        | 425        |            |            | 1525       |
| <b>Hb (g/dL)</b>                          | -          | -          | -          | -          | -        | -          | -          | -          | 12 (11-14) | 11 (9-12)  | -          |
| <b>N</b>                                  | -          | -          | -          | -          | -        | -          | -          | -          | 724        | 366        | -          |
| <b>Hb (&lt;10 g/dL)</b>                   | -          | -          | -          | -          | -        | -          | -          | -          | 113 (15.6) | 133 (36.3) | -          |
| <b>N</b>                                  |            |            |            |            |          |            |            |            | 724        | 366        |            |

†Data are median (25th-75th percentiles) or Count (%)

\*One study among a prison population

\*\*Sputum and/or non-sputum Xpert result

\*\*\*Sputum and/or non-sputum culture result

Definition of abbreviations: ART = antiretroviral therapy, BMI = body mass index, CRP = C-reactive protein, CXR = chest X-ray, Hb = haemoglobin, IPT = Isoniazid preventive therapy, W4SS = WHO four-symptom screen

**Table S6 - Prevalence of tuberculosis in all participants and by different subgroups (using culture or Xpert as reference standard)**

| Subgroup§                           | No studies | N             | No tuberculosis | Prevalence % (95% CI)† | Heterogeneity           |                   | Egger's test (p-value) | Subgroup analysis (p-value)†† |
|-------------------------------------|------------|---------------|-----------------|------------------------|-------------------------|-------------------|------------------------|-------------------------------|
|                                     |            |               |                 |                        | I <sup>2</sup> (95% CI) | P-value           |                        |                               |
| <b>All</b>                          | <b>21</b>  | <b>15,666</b> | <b>1,453</b>    | <b>8.7 (6.7-11.3)</b>  | <b>95 (94-96)</b>       | <b>&lt;0.0001</b> | <b>0.06</b>            | <b>-</b>                      |
| <b>All (setting and ART status)</b> | <b>21</b>  | <b>15,663</b> | <b>1,453</b>    | <b>8.7 (6.7-11.3)</b>  | <b>95 (94-96)</b>       | <b>&lt;0.0001</b> | <b>0.06</b>            | <b>-</b>                      |
| Outpatients (on ART)*               | 9          | 4,328         | 169             | 4.2 (3.1-5.6)          | 75 (52-87)              | <0.0001           | 0.78                   | <0.0001                       |
| Outpatients (not on ART)            | 20         | 11,210        | 1,269           | 10.2 (8.0-12.9)        | 92 (89-94)              | <0.0001           | 0.06                   | -                             |
| Other setting**                     | 1          | 125           | 15              | 12.0 (7.4-19.0)        | - (-)                   | -                 | -                      | -                             |
| <b>All (CD4 count)</b>              | <b>21</b>  | <b>15,281</b> | <b>1,423</b>    | <b>8.7 (6.7-11.2)</b>  | <b>95 (93-96)</b>       | <b>&lt;0.0001</b> | <b>0.06</b>            | <b>-</b>                      |
| CD4 count ≤200 cells/μL             | 21         | 5,641         | 922             | 15.1 (12.8-17.7)       | 82 (73-88)              | <0.0001           | 0.05                   | <0.0001                       |
| CD4 count >200 cells/μL             | 21         | 9,640         | 501             | 5.5 (4.2-7.1)          | 88 (84-92)              | <0.0001           | 0.42                   | -                             |
| <b>All (pregnancy status)***</b>    | <b>21</b>  | <b>10,388</b> | <b>746</b>      | <b>7.0 (5.3-9.2)</b>   | <b>91 (88-94)</b>       | <b>&lt;0.0001</b> | <b>0.22</b>            | <b>-</b>                      |
| Pregnant                            | 8          | 1,938         | 56              | 2.9 (2.2-3.7)          | 16 (0-59)               | <0.0001           | 0.09                   | <0.0001                       |
| Non-pregnant                        | 19         | 8,450         | 690             | 8.0 (6.2-10.3)         | 89 (85-92)              | <0.0001           | 0.32                   | -                             |

§Subgroup in bold is the overall comparator. For example, all (setting and ART status) contains combined subgroups outpatients (on ART), outpatients (not on ART), and other setting

†Calculated using meta-analysis of proportions. We used a generalized linear mixed model with logit transformation in preference to protocol specified DerSimonian and Laird random effects model for proportions with variance stabilization by applying the Freeman-Tukey double arcsine transformation

††P-value of between subgroups heterogeneity statistic Q (based on random effects model)

\*P(subgroup) compares outpatients (on ART) with outpatients (not on ART)

\*\*One study among a prison population

\*\*\*Pregnancy status unavailable for some studies, female participants in those studies categorized as non-pregnant

Definition of abbreviations: ART = antiretroviral therapy

**Table S7 - Indirect comparisons between each test and WHO four-symptom screen for the detection of tuberculosis in subgroups**

Table S7A - Indirect comparisons between each test and WHO four-symptom screen for the detection of tuberculosis in outpatients (on ART)†

| Test                                  | No studies | N    | Sensitivity (95% CI) | Specificity (95% CI) | Difference from W4SS†† |                       |
|---------------------------------------|------------|------|----------------------|----------------------|------------------------|-----------------------|
|                                       |            |      |                      |                      | Sensitivity (p-value)  | Specificity (p-value) |
| <b>W4SS</b>                           | 9          | 4309 | 53 (35-71)           | 71 (51-85)           | -                      | -                     |
| <b>CRP (&gt;=10 mg/L)</b>             | 1          | 381  | 20 (3-69)            | 90 (93-87)           | 0.296                  | 0.29                  |
| <b>CRP (&gt;=8 mg/L)</b>              | 1          | 381  | 40 (10-80)           | 89 (92-86)           | 0.689                  | 0.342                 |
| <b>CRP (&gt;=5 mg/L)</b>              | 1          | 381  | 40 (10-80)           | 80 (84-75)           | 0.689                  | 0.697                 |
| <b>CXR (abnormal)</b>                 | 4          | 2670 | 73 (60-83)           | 63 (50-75)           | 0.142                  | 0.59                  |
| <b>CXR (suggests tuberculosis)</b>    | 4          | 2581 | 70 (55-82)           | 78 (62-89)           | 0.188                  | 0.571                 |
| <b>Cough (any)</b>                    | 9          | 4309 | 40 (24-58)           | 83 (73-90)           | 0.286                  | 0.206                 |
| <b>Cough (&gt;=2 weeks)</b>           | 6          | 1746 | 19 (5-52)            | 93 (79-98)           | 0.054                  | 0.031                 |
| <b>Hb (&lt;10 g/dL)</b>               | 4          | 844  | 55 (34-75)           | 82 (70-91)           | 0.996                  | 0.315                 |
| <b>Hb (&lt;8 g/dL)</b>                | 4          | 844  | 18 (5-49)            | 94 (91-96)           | 0.057                  | 0.013                 |
| <b>BMI (&lt;18.5 kg/m²)</b>           | 7          | 4036 | 16 (8-30)            | 93 (88-96)           | 0.004                  | 0.007                 |
| <b>Lymphadenopathy</b>                | 1          | 338  | 22 (6-58)            | 93 (95-89)           | 0.278                  | 0.204                 |
| <b>W4SS with CRP (&gt;=10 mg/L)¶¶</b> | 1          | 381  | 20 (3-69)            | 80 (83-75)           | 0.296                  | 0.706                 |
| <b>W4SS with CXR (abnormal)¶¶</b>     | 4          | 2670 | 89 (70-97)           | 33 (17-54)           | 0.014                  | 0.036                 |
| <b>W4SS then CRP (&gt;=5 mg/L)¶¶</b>  | 1          | 381  | 8 (1-62)             | 96 (97-93)           | 0.04                   | 0.09                  |
|                                       |            |      |                      |                      |                        |                       |
| <b>W4SS then Xpert*</b>               | 4          | 2645 | 37 (25-52)           | 100 (96-100)         | -                      | -                     |
| <b>Xpert alone*</b>                   | 4          | 2645 | 53 (22-83)           | 99 (97-99)           | 0.219                  | 0.306                 |

†Using culture as a reference standard. Indirect comparisons are based on all studies that evaluated at least one of the W4SS or relevant screening tests

††For Xpert alone, the comparator is W4SS then Xpert

¶¶For parallel strategies, two screening tests are offered at the same time. For sequential strategies, a second screening test is offered only if the first screening test is positive

\*Accuracy measures for entire algorithm using total Xpert (sputum and/or non-sputum Xpert result). Alternative algorithms are W4SS then single sputum Xpert (4 studies; 2645 participants; sensitivity 37 (25-52), specificity 100 (96-100) and single sputum Xpert alone (4 studies; 2645 participants; sensitivity 53 (22-83), specificity 99 (97-99).

Definition of abbreviations: BMI = body mass index, CRP = C-reactive protein, CXR = chest X-ray, Hb = haemoglobin, W4SS = WHO four-symptom screen

Table S7B - Indirect comparisons between each test and WHO four-symptom screen for the detection of tuberculosis in outpatients (not on ART)†

| Test                                   | No studies | N     | Sensitivity (95% CI) | Specificity (95% CI) | Difference from W4SS†† |                       |
|----------------------------------------|------------|-------|----------------------|----------------------|------------------------|-----------------------|
|                                        |            |       |                      |                      | Sensitivity (p-value)  | Specificity (p-value) |
| <b>W4SS</b>                            | 20         | 11160 | 85 (76-91)           | 37 (25-51)           | -                      | -                     |
| <b>CRP (&gt;=10 mg/L)</b>              | 5          | 3187  | 83 (79-86)           | 67 (60-73)           | 0.953                  | 0.085                 |
| <b>CRP (&gt;=8 mg/L)</b>               | 5          | 3187  | 85 (81-88)           | 63 (56-70)           | 0.8                    | 0.135                 |
| <b>CRP (&gt;=5 mg/L)</b>               | 5          | 3187  | 89 (86-92)           | 53 (46-61)           | 0.318                  | 0.375                 |
| <b>CXR (abnormal)</b>                  | 8          | 3525  | 71 (64-78)           | 62 (51-72)           | 0.102                  | 0.034                 |
| <b>CXR (suggests tuberculosis)</b>     | 8          | 3569  | 62 (55-68)           | 79 (67-87)           | 0.01                   | 0.001                 |
| <b>Cough (any)</b>                     | 20         | 11131 | 58 (50-65)           | 70 (63-76)           | <0.0001                | <0.0001               |
| <b>Cough (&gt;=2 weeks)</b>            | 16         | 9032  | 43 (34-52)           | 82 (75-87)           | <0.0001                | <0.0001               |
| <b>Hb (&lt;10 g/dL)</b>                | 9          | 4269  | 44 (32-56)           | 78 (70-85)           | <0.0001                | <0.0001               |
| <b>Hb (&lt;8 g/dL)</b>                 | 9          | 4269  | 11 (8-15)            | 96 (93-98)           | <0.0001                | <0.0001               |
| <b>BMI (&lt;18.5 kg/m<sup>2</sup>)</b> | 17         | 8486  | 31 (23-41)           | 87 (82-91)           | <0.0001                | <0.0001               |
| <b>Lymphadenopathy</b>                 | 4          | 2053  | 30 (13-55)           | 91 (76-97)           | 0.001                  | <0.0001               |
| <b>W4SS with CRP (&gt;=10 mg/L)¶</b>   | 5          | 3187  | 94 (87-97)           | 20 (12-33)           | 0.113                  | 0.155                 |
| <b>W4SS with CXR (abnormal)¶</b>       | 8          | 3516  | 95 (91-97)           | 18 (9-33)            | 0.007                  | 0.064                 |
| <b>W4SS then CRP (&gt;=5 mg/L)¶</b>    | 5          | 3187  | 84 (75-90)           | 64 (57-71)           | 0.793                  | 0.056                 |
|                                        |            |       |                      |                      |                        |                       |
| <b>W4SS then Xpert*§</b>               | 11         | 5784  | 64 (57-71)           | 99 (98-99)           | -                      | -                     |
| <b>Xpert alone*§</b>                   | 11         | 5797  | 74 (64-82)           | 99 (98-99)           | 0.199                  | 0.59                  |

†Using culture as a reference standard. Indirect comparisons are based on all studies that evaluated at least one of the W4SS or relevant screening tests

††For Xpert alone, the comparator is W4SS then Xpert

¶¶For parallel strategies, two screening tests are offered at the same time. For sequential strategies, a second screening test is offered only if the first screening test is positive

\*Accuracy measures for entire algorithm using total Xpert (sputum and/or non-sputum Xpert result). Alternative algorithms are W4SS then single sputum Xpert (11 studies; 5783 participants; sensitivity 61 (53-69), specificity 99 (98-99) and single sputum Xpert alone (11 studies; 5796 participants; sensitivity 70 (58-80), specificity 99 (98-99).

§One study assessed Xpert and Xpert Ultra among 733 participants. The accuracy of sputum Xpert was: sensitivity 57 (47-67), specificity 99 (98-100); sputum Xpert Ultra: sensitivity 73 (62-81), specificity 98 (96-98); urine Xpert Ultra: sensitivity 27 (19-38), specificity 98 (96-99); sputum and urine Xpert Ultra: sensitivity 75 (65-83), specificity 95 (94-97)

Definition of abbreviations: BMI = body mass index, CRP = C-reactive protein, CXR = chest X-ray, Hb = haemoglobin, W4SS = WHO four-symptom screen

Table S7C - Indirect comparisons between each test and WHO four-symptom screen for the detection of tuberculosis in participants with CD4 cell count  $\leq 200$  cells/ $\mu$ L†

| Test                                                 | No studies | N    | Sensitivity (95% CI) | Specificity (95% CI) | Difference from W4SS†† |                       |
|------------------------------------------------------|------------|------|----------------------|----------------------|------------------------|-----------------------|
|                                                      |            |      |                      |                      | Sensitivity (p-value)  | Specificity (p-value) |
| <b>W4SS</b>                                          | 21         | 5617 | 87 (77-93)           | 33 (20-48)           | -                      | -                     |
| <b>CRP (<math>\geq 10</math> mg/L)</b>               | 5          | 1593 | 88 (82-92)           | 62 (50-73)           | 0.923                  | 0.07                  |
| <b>CRP (<math>\geq 8</math> mg/L)</b>                | 5          | 1593 | 90 (86-93)           | 58 (45-70)           | 0.62                   | 0.113                 |
| <b>CRP (<math>\geq 5</math> mg/L)</b>                | 5          | 1593 | 92 (88-95)           | 48 (34-62)           | 0.385                  | 0.319                 |
| <b>CXR (abnormal)</b>                                | 8          | 2201 | 73 (65-80)           | 58 (48-67)           | 0.127                  | 0.063                 |
| <b>CXR (suggests tuberculosis)</b>                   | 8          | 2134 | 64 (57-71)           | 74 (64-82)           | 0.026                  | 0.003                 |
| <b>Cough (any)</b>                                   | 21         | 5607 | 59 (51-66)           | 66 (58-73)           | <0.0001                | <0.0001               |
| <b>Cough (<math>\geq 2</math> weeks)</b>             | 17         | 4197 | 42 (33-51)           | 78 (70-85)           | <0.0001                | <0.0001               |
| <b>Hb (<math>&lt; 10</math> g/dL)</b>                | 9          | 1970 | 54 (41-65)           | 74 (64-81)           | 0.004                  | 0.002                 |
| <b>Hb (<math>&lt; 8</math> g/dL)</b>                 | 9          | 1970 | 14 (9-19)            | 95 (91-97)           | <0.0001                | <0.0001               |
| <b>BMI (<math>&lt; 18.5</math> kg/m<sup>2</sup>)</b> | 18         | 4950 | 35 (27-44)           | 83 (77-88)           | <0.0001                | <0.0001               |
| <b>Lymphadenopathy</b>                               | 4          | 1001 | 33 (15-58)           | 89 (73-96)           | 0.004                  | 0.002                 |
| <b>W4SS with CRP (<math>\geq 10</math> mg/L)¶</b>    | 5          | 1593 | 93 (87-99)           | 23 (9-47)            | 0.211                  | 0.548                 |
| <b>W4SS with CXR (abnormal)¶</b>                     | 8          | 2199 | 96 (91-98)           | 14 (7-25)            | 0.022                  | 0.06                  |
| <b>W4SS then CRP (<math>\geq 5</math> mg/L)¶</b>     | 5          | 1593 | 80 (74-86)           | 66 (57-76)           | 0.579                  | 0.066                 |
|                                                      |            |      |                      |                      |                        |                       |
| <b>W4SS then Xpert*§</b>                             | 12         | 3110 | 69 (61-76)           | 98 (97-99)           | -                      | -                     |
| <b>Xpert alone*§</b>                                 | 12         | 3115 | 77 (68-84)           | 98 (97-99)           | 0.167                  | 0.879                 |

†Using culture as a reference standard. Indirect comparisons are based on all studies that evaluated at least one of the W4SS or relevant screening tests

††For Xpert alone, the comparator is W4SS then Xpert

¶¶For parallel strategies, two screening tests are offered at the same time. For sequential strategies, a second screening test is offered only if the first screening test is positive

\*Accuracy measures for entire algorithm using total Xpert (sputum and/or non-sputum Xpert result). Alternative algorithms are W4SS then single sputum Xpert (12 studies; 3110 participants; sensitivity 65 (57-72), specificity 98 (97-99) and single sputum Xpert alone (12 studies; 3115 participants; sensitivity 72 (62-81), specificity 98 (97-99).

§One study assessed Xpert and Xpert Ultra among 191 participants. The accuracy of sputum Xpert was: sensitivity 69 (54-81), specificity 98 (94-99); sputum Xpert Ultra: sensitivity 83 (69-92), specificity 95 (90-97); urine Xpert Ultra: sensitivity 40 (27-56), specificity 95 (90-98); sputum and urine Xpert Ultra: sensitivity 88 (74-95), specificity 91 (86-95)

Definition of abbreviations: BMI = body mass index, CRP = C-reactive protein, CXR = chest X-ray, Hb = haemoglobin, W4SS = WHO four-symptom screen

Table S7D - Indirect comparisons between each test and WHO four-symptom screen for the detection of tuberculosis in participants with CD4 cell count >200 cells/ $\mu$ L†

| Test                                              | No studies | N    | Sensitivity (95% CI) | Specificity (95% CI) | Difference from W4SS†† |                       |
|---------------------------------------------------|------------|------|----------------------|----------------------|------------------------|-----------------------|
|                                                   |            |      |                      |                      | Sensitivity (p-value)  | Specificity (p-value) |
| <b>W4SS</b>                                       | 21         | 9598 | 71 (59-81)           | 49 (36-63)           | -                      | -                     |
| <b>CRP (<math>\geq</math>10 mg/L)</b>             | 5          | 1822 | 65 (52-76)           | 79 (68-87)           | 0.543                  | 0.03                  |
| <b>CRP (<math>\geq</math>8 mg/L)</b>              | 5          | 1822 | 67 (53-79)           | 76 (64-85)           | 0.693                  | 0.058                 |
| <b>CRP (<math>\geq</math>5 mg/L)</b>              | 5          | 1822 | 78 (65-87)           | 65 (54-75)           | 0.469                  | 0.274                 |
| <b>CXR (abnormal)</b>                             | 8          | 3892 | 66 (57-74)           | 64 (53-74)           | 0.777                  | 0.23                  |
| <b>CXR (suggests tuberculosis)</b>                | 8          | 3915 | 59 (49-69)           | 81 (70-89)           | 0.341                  | 0.006                 |
| <b>Cough (any)</b>                                | 21         | 9581 | 51 (41-61)           | 76 (68-82)           | 0.019                  | 0.002                 |
| <b>Cough (<math>\geq</math>2 weeks)</b>           | 17         | 6409 | 34 (23-48)           | 87 (80-91)           | <0.0001                | <0.0001               |
| <b>Hb (&lt;10 g/dL)</b>                           | 9          | 3047 | 25 (17-37)           | 84 (78-89)           | <0.0001                | 0.001                 |
| <b>Hb (&lt;8 g/dL)</b>                            | 9          | 3047 | 6 (3-15)             | 96 (94-98)           | <0.0001                | <0.0001               |
| <b>BMI (&lt;18.5 kg/m<sup>2</sup>)</b>            | 18         | 7362 | 20 (13-29)           | 92 (88-95)           | <0.0001                | <0.0001               |
| <b>Lymphadenopathy</b>                            | 4          | 1373 | 30 (10-61)           | 90 (73-97)           | 0.017                  | 0.004                 |
| <b>W4SS with CRP (<math>\geq</math>10 mg/L)¶¶</b> | 5          | 1822 | 78 (53-92)           | 35 (15-61)           | 0.496                  | 0.349                 |
| <b>W4SS with CXR (abnormal)¶¶</b>                 | 8          | 3886 | 91 (81-96)           | 28 (16-44)           | 0.008                  | 0.073                 |
| <b>W4SS then CRP (<math>\geq</math>5 mg/L)¶¶</b>  | 5          | 1822 | 57 (15-91)           | 80 (62-91)           | 0.639                  | 0.03                  |
|                                                   |            |      |                      |                      |                        |                       |
| <b>W4SS then Xpert*§</b>                          | 12         | 5128 | 46 (39-52)           | 99 (99-100)          | -                      | -                     |
| <b>Xpert alone*§</b>                              | 12         | 5135 | 57 (47-67)           | 99 (99-99)           | 0.052                  | 0.218                 |

†Using culture as a reference standard. Indirect comparisons are based on all studies that evaluated at least one of the W4SS or relevant screening tests

††For Xpert alone, the comparator is W4SS then Xpert

¶¶For parallel strategies, two screening tests are offered at the same time. For sequential strategies, a second screening test is offered only if the first screening test is positive

\*Accuracy measures for entire algorithm using total Xpert (sputum and/or non-sputum Xpert result). Alternative algorithms are W4SS then single sputum Xpert (12 studies; 5127 participants; sensitivity 44 (38-51), specificity 100 (99-100) and single sputum Xpert alone (12 studies; 5134 participants; sensitivity 54 (44-64), specificity 99 (99-99).

§One study assessed Xpert and Xpert Ultra among 472 participants. The accuracy of sputum Xpert was: sensitivity 42 (28-58), specificity 99 (98-100); sputum Xpert Ultra: sensitivity 62 (47-76), specificity 98 (96-99); urine Xpert Ultra: sensitivity 8 (2-21), specificity 99 (97-99); sputum and urine Xpert Ultra: sensitivity 62 (47-76), specificity 97 (95-98)

Definition of abbreviations: BMI = body mass index, CRP = C-reactive protein, CXR = chest X-ray, Hb = haemoglobin, W4SS = WHO four-symptom screen



Table S7E - Indirect comparisons between each test and WHO four-symptom screen for the detection of tuberculosis in pregnant participants†§

| Test                                   | No studies | N    | Sensitivity (95% CI) | Specificity (95% CI) | Difference from W4SS†† |                       |
|----------------------------------------|------------|------|----------------------|----------------------|------------------------|-----------------------|
|                                        |            |      |                      |                      | Sensitivity (p-value)  | Specificity (p-value) |
| <b>W4SS</b>                            | 8          | 1935 | 84 (24-99)           | 58 (39-75)           | -                      | -                     |
| <b>CRP (&gt;=10 mg/L)#</b>             | -          | -    | -                    | -                    | -                      | -                     |
| <b>CRP (&gt;=8 mg/L)#</b>              | -          | -    | -                    | -                    | -                      | -                     |
| <b>CRP (&gt;=5 mg/L)#</b>              | -          | -    | -                    | -                    | -                      | -                     |
| <b>CXR (abnormal)</b>                  | 1          | 8    | 75 (11-99)           | 69 (91-33)           | 0.538                  | 0.619                 |
| <b>CXR (suggests tuberculosis)</b>     | 1          | 7    | 75 (11-99)           | 93 (100-42)          | 0.456                  | 0.041                 |
| <b>Cough (any)</b>                     | 8          | 1933 | 67 (26-92)           | 81 (71-88)           | 0.445                  | 0.038                 |
| <b>Cough (&gt;=2 weeks)</b>            | 8          | 1933 | 47 (18-78)           | 92 (86-95)           | 0.203                  | 0.001                 |
| <b>Hb (&lt;10 g/dL)</b>                | 5          | 1350 | 20 (10-36)           | 75 (61-85)           | 0.132                  | 0.227                 |
| <b>Hb (&lt;8 g/dL)</b>                 | 5          | 1350 | 0 (0-100)            | 98 (97-99)           | <0.0001                | <0.0001               |
| <b>BMI (&lt;18.5 kg/m<sup>2</sup>)</b> | 7          | 472  | 0 (0-100)            | 96 (94-98)           | 0.003                  | <0.0001               |
| <b>Lymphadenopathy#</b>                | -          | -    | -                    | -                    | -                      | -                     |
| <b>W4SS with CRP (&gt;=10 mg/L)¶#</b>  | -          | -    | -                    | -                    | -                      | -                     |
| <b>W4SS with CXR (abnormal)¶¶</b>      | 1          | 8    | 75 (11-99)           | 56 (84-24)           | 0.541                  | 0.987                 |
| <b>W4SS then CRP (&gt;=5 mg/L)¶¶#</b>  | -          | -    | -                    | -                    | -                      | -                     |
|                                        |            |      |                      |                      |                        |                       |
| <b>W4SS then Xpert*</b>                | 5          | 489  | 36 (16-62)           | 100 (0-100)          | -                      | -                     |
| <b>Xpert alone*</b>                    | 5          | 492  | 53 (29-76)           | 99 (98-100)          | 0.339                  | 0.05                  |

†Using culture as a reference standard. Indirect comparisons are based on all studies that evaluated at least one of the W4SS or relevant screening tests

§For some analyses, all studies had 0% or 100% sensitivity/specificity; therefore, models may have given unreliable estimates such as 95% CIs that range from 0 to 100

††For Xpert alone, the comparator is W4SS then Xpert

¶¶For parallel strategies, two screening tests are offered at the same time. For sequential strategies, a second screening test is offered only if the first screening test is positive

#Insufficient data to perform meta-analysis

\*Accuracy measures for entire algorithm using total Xpert (sputum and/or non-sputum Xpert result). Alternative algorithms are W4SS then single sputum Xpert (5 studies; 489 participants; sensitivity 36 (16-62), specificity 100 (0-100) and single sputum Xpert alone (5 studies; 492 participants; sensitivity 47 (24-71), specificity 99 (98-100).

Definition of abbreviations: BMI = body mass index, CRP = C-reactive protein, CXR = chest X-ray, Hb = haemoglobin, W4SS = WHO four-symptom screen

**Table S8 - Direct comparisons between each test and WHO four-symptom screen for the detection of tuberculosis in all participants and subgroups**

Table S8A - Direct comparisons between each test and WHO four-symptom screen for the detection of tuberculosis in all participants†

|                                  | Index Test    |       |                      |                      | W4SS          |       |                      |                      | Difference from W4SS  |                       |
|----------------------------------|---------------|-------|----------------------|----------------------|---------------|-------|----------------------|----------------------|-----------------------|-----------------------|
|                                  | No of studies | N     | Sensitivity (95% CI) | Specificity (95% CI) | No of studies | N     | Sensitivity (95% CI) | Specificity (95% CI) | Sensitivity (p-value) | Specificity (p-value) |
| CRP ( $\geq 10$ mg/L)            | 5             | 3571  | 77 (50-92)           | 74 (52-88)           | 5             | 3571  | 82 (58-94)           | 39 (20-63)           | 0.7                   | 0.052                 |
| CRP ( $\geq 8$ mg/L)             | 5             | 3571  | 79 (54-93)           | 70 (48-86)           | 5             | 3571  | 82 (58-94)           | 39 (20-63)           | 0.833                 | 0.079                 |
| CRP ( $\geq 5$ mg/L)             | 5             | 3571  | 86 (67-95)           | 60 (37-79)           | 5             | 3571  | 82 (59-94)           | 39 (20-62)           | 0.706                 | 0.231                 |
| CXR (abnormal)                   | 8             | 6186  | 72 (62-80)           | 62 (46-75)           | 8             | 6186  | 86 (80-91)           | 32 (20-47)           | 0.011                 | 0.017                 |
| CXR (suggests tuberculosis)      | 8             | 6141  | 64 (53-73)           | 78 (63-88)           | 8             | 6141  | 84 (76-89)           | 33 (19-51)           | 0.004                 | 0.001                 |
| Cough (any)                      | 21            | 15568 | 56 (44-66)           | 72 (62-81)           | 21            | 15568 | 82 (74-88)           | 42 (31-54)           | <0.0001               | 0.001                 |
| Cough ( $\geq 2$ weeks)          | 17            | 10906 | 38 (25-52)           | 85 (75-91)           | 17            | 10906 | 81 (70-88)           | 41 (28-56)           | <0.0001               | <0.0001               |
| Hb (<10 g/dL)                    | 9             | 5115  | 44 (25-65)           | 80 (65-89)           | 9             | 5115  | 85 (70-93)           | 33 (18-51)           | 0.006                 | 0.001                 |
| Hb (<8 g/dL)                     | 9             | 5115  | 12 (5-25)            | 96 (91-98)           | 9             | 5115  | 85 (69-93)           | 33 (18-52)           | <0.0001               | <0.0001               |
| BMI (<18.5 kg/m <sup>2</sup> )   | 18            | 12639 | 29 (20-40)           | 89 (82-93)           | 18            | 12639 | 84 (76-90)           | 41 (29-54)           | <0.0001               | <0.0001               |
| Lymphadenopathy                  | 4             | 2389  | 31 (16-52)           | 90 (77-96)           | 4             | 2389  | 91 (79-96)           | 27 (12-49)           | 0.001                 | 0.001                 |
| W4SS with CRP ( $\geq 10$ mg/L)¶ | 5             | 3571  | 89 (63-97)           | 31 (12-58)           | 5             | 3571  | 82 (50-95)           | 39 (17-67)           | 0.617                 | 0.65                  |
| W4SS with CXR (abnormal)¶        | 8             | 6186  | 94 (89-97)           | 20 (10-37)           | 8             | 6186  | 87 (78-92)           | 32 (17-52)           | 0.05                  | 0.32                  |
| W4SS then CRP ( $\geq 5$ mg/L)¶  | 5             | 3571  | 72 (36-92)           | 75 (50-90)           | 5             | 3571  | 81 (49-95)           | 39 (18-66)           | 0.62                  | 0.074                 |

†Using culture as a reference standard. Direct comparisons are based on all studies that evaluated both the W4SS and relevant screening test

¶For parallel strategies, two screening tests are offered at the same time. For sequential strategies, a second screening test is offered only if the first screening test is positive

Definition of abbreviations: BMI = body mass index, CRP = C-reactive protein, CXR = chest X-ray, Hb = haemoglobin, W4SS = WHO four-symptom screen

Table S8B - Direct comparisons between each test and WHO four-symptom screen for the detection of tuberculosis in outpatients (on ART)†

|                                    | Index Test    |      |                      |                      | W4SS          |      |                      |                      | Difference from W4SS  |                       |
|------------------------------------|---------------|------|----------------------|----------------------|---------------|------|----------------------|----------------------|-----------------------|-----------------------|
|                                    | No of studies | N    | Sensitivity (95% CI) | Specificity (95% CI) | No of studies | N    | Sensitivity (95% CI) | Specificity (95% CI) | Sensitivity (p-value) | Specificity (p-value) |
| CRP ( $\geq 10$ mg/L)              | 1             | 381  | 20 (3-69)            | 90 (87-93)           | 1             | 381  | 8 (1-62)             | 88 (84-91)           | 0.458                 | 0.246                 |
| CRP ( $\geq 8$ mg/L)               | 1             | 381  | 40 (10-80)           | 89 (86-92)           | 1             | 381  | 8 (1-62)             | 88 (84-91)           | 0.223                 | 0.571                 |
| CRP ( $\geq 5$ mg/L)               | 1             | 381  | 40 (10-80)           | 80 (75-84)           | 1             | 381  | 8 (1-62)             | 88 (84-91)           | 0.223                 | 0.003                 |
| CXR (abnormal)                     | 4             | 2670 | 74 (55-87)           | 63 (42-80)           | 4             | 2670 | 70 (50-85)           | 52 (31-72)           | 0.786                 | 0.469                 |
| CXR (suggests tuberculosis)        | 4             | 2581 | 71 (52-84)           | 78 (57-91)           | 4             | 2581 | 64 (44-80)           | 54 (31-76)           | 0.587                 | 0.144                 |
| Cough (any)                        | 9             | 4309 | 40 (23-58)           | 83 (70-91)           | 9             | 4309 | 54 (36-72)           | 71 (54-84)           | 0.286                 | 0.206                 |
| Cough ( $\geq 2$ weeks)            | 6             | 1746 | 20 (6-50)            | 93 (79-98)           | 6             | 1746 | 52 (23-80)           | 74 (45-91)           | 0.136                 | 0.09                  |
| Hb ( $< 10$ g/dL)                  | 4             | 844  | 52 (15-87)           | 84 (60-94)           | 4             | 844  | 65 (21-93)           | 54 (26-79)           | 0.689                 | 0.107                 |
| Hb ( $< 8$ g/dL)                   | 4             | 844  | 15 (1-78)            | 95 (84-98)           | 4             | 844  | 67 (9-98)            | 54 (27-78)           | 0.285                 | 0.008                 |
| BMI ( $< 18.5$ kg/m <sup>2</sup> ) | 7             | 4036 | 16 (8-32)            | 93 (85-97)           | 7             | 4036 | 53 (33-72)           | 73 (54-86)           | 0.009                 | 0.017                 |
| Lymphadenopathy                    | 1             | 338  | 22 (6-58)            | 93 (89-95)           | 1             | 338  | 78 (42-94)           | 55 (50-60)           | 0.027                 | <0.0001               |
| W4SS with CRP ( $\geq 10$ mg/L)¶   | 1             | 381  | 20 (3-69)            | 80 (75-83)           | 1             | 381  | 8 (1-62)             | 88 (84-91)           | 0.458                 | 0.003                 |
| W4SS with CXR (abnormal)¶          | 4             | 2670 | 89 (71-96)           | 33 (15-57)           | 4             | 2670 | 73 (47-89)           | 52 (28-75)           | 0.187                 | 0.291                 |
| W4SS then CRP ( $\geq 5$ mg/L)¶    | 1             | 381  | 8 (1-62)             | 96 (93-97)           | 1             | 381  | 8 (1-62)             | 88 (84-91)           | 1                     | <0.0001               |

†Using culture as a reference standard. Direct comparisons are based on all studies that evaluated both the W4SS and relevant screening test

¶For parallel strategies, two screening tests are offered at the same time. For sequential strategies, a second screening test is offered only if the first screening test is positive

Definition of abbreviations: BMI = body mass index, CRP = C-reactive protein, CXR = chest X-ray, Hb = haemoglobin, W4SS = WHO four-symptom screen

Table S8C - Direct comparisons between each test and WHO four-symptom screen for the detection of tuberculosis in outpatients (not on ART)†

|                                    | Index Test    |       |                      |                      | W4SS          |       |                      |                      | Difference from W4SS  |                       |
|------------------------------------|---------------|-------|----------------------|----------------------|---------------|-------|----------------------|----------------------|-----------------------|-----------------------|
|                                    | No of studies | N     | Sensitivity (95% CI) | Specificity (95% CI) | No of studies | N     | Sensitivity (95% CI) | Specificity (95% CI) | Sensitivity (p-value) | Specificity (p-value) |
| CRP ( $\geq 10$ mg/L)              | 5             | 3187  | 84 (74-90)           | 66 (53-78)           | 5             | 3187  | 90 (83-94)           | 27 (17-40)           | 0.236                 | 0.005                 |
| CRP ( $\geq 8$ mg/L)               | 5             | 3187  | 85 (75-92)           | 63 (49-75)           | 5             | 3187  | 90 (82-95)           | 27 (17-40)           | 0.349                 | 0.008                 |
| CRP ( $\geq 5$ mg/L)               | 5             | 3187  | 90 (83-95)           | 53 (39-66)           | 5             | 3187  | 90 (83-94)           | 27 (18-40)           | 0.952                 | 0.031                 |
| CXR (abnormal)                     | 8             | 3516  | 71 (62-79)           | 62 (48-74)           | 8             | 3516  | 89 (83-93)           | 27 (17-40)           | 0.001                 | 0.002                 |
| CXR (suggests tuberculosis)        | 8             | 3560  | 62 (52-71)           | 79 (65-88)           | 8             | 3560  | 87 (81-92)           | 28 (17-44)           | <0.0001               | <0.0001               |
| Cough (any)                        | 20            | 11131 | 58 (47-68)           | 70 (60-78)           | 20            | 11131 | 85 (78-90)           | 37 (27-48)           | <0.0001               | <0.0001               |
| Cough ( $\geq 2$ weeks)            | 16            | 9032  | 42 (29-55)           | 82 (72-89)           | 16            | 9032  | 83 (74-90)           | 37 (25-50)           | <0.0001               | <0.0001               |
| Hb ( $< 10$ g/dL)                  | 9             | 4268  | 44 (27-63)           | 79 (65-88)           | 9             | 4268  | 89 (78-95)           | 26 (15-41)           | 0.001                 | <0.0001               |
| Hb ( $< 8$ g/dL)                   | 9             | 4268  | 11 (5-21)            | 96 (92-98)           | 9             | 4268  | 88 (78-94)           | 26 (15-42)           | <0.0001               | <0.0001               |
| BMI ( $< 18.5$ kg/m <sup>2</sup> ) | 17            | 8475  | 31 (22-42)           | 87 (81-92)           | 17            | 8475  | 87 (81-92)           | 34 (24-46)           | <0.0001               | <0.0001               |
| Lymphadenopathy                    | 4             | 2051  | 30 (15-51)           | 91 (78-96)           | 4             | 2051  | 91 (80-96)           | 25 (11-48)           | 0.001                 | 0.001                 |
| W4SS with CRP ( $\geq 10$ mg/L)¶   | 5             | 3187  | 94 (87-97)           | 20 (11-34)           | 5             | 3187  | 90 (79-95)           | 28 (16-43)           | 0.351                 | 0.407                 |
| W4SS with CXR (abnormal)¶          | 8             | 3516  | 95 (91-97)           | 18 (9-32)            | 8             | 3516  | 89 (82-93)           | 27 (15-44)           | 0.045                 | 0.364                 |
| W4SS then CRP ( $\geq 5$ mg/L)¶    | 5             | 3187  | 83 (72-91)           | 65 (51-76)           | 5             | 3187  | 90 (82-95)           | 27 (18-40)           | 0.254                 | 0.004                 |

†Using culture as a reference standard. Direct comparisons are based on all studies that evaluated both the W4SS and relevant screening test

¶For parallel strategies, two screening tests are offered at the same time. For sequential strategies, a second screening test is offered only if the first screening test is positive

Definition of abbreviations: BMI = body mass index, CRP = C-reactive protein, CXR = chest X-ray, Hb = haemoglobin, W4SS = WHO four-symptom screen

Table S8D - Direct comparisons between each test and WHO four-symptom screen for the detection of tuberculosis in participants with CD4 cell count  $\leq 200$  cells/ $\mu$ L†

|                                    | Index Test    |      |                      |                      | W4SS          |      |                      |                      | Difference from W4SS  |                       |
|------------------------------------|---------------|------|----------------------|----------------------|---------------|------|----------------------|----------------------|-----------------------|-----------------------|
|                                    | No of studies | N    | Sensitivity (95% CI) | Specificity (95% CI) | No of studies | N    | Sensitivity (95% CI) | Specificity (95% CI) | Sensitivity (p-value) | Specificity (p-value) |
| CRP ( $\geq 10$ mg/L)              | 5             | 1593 | 87 (59-97)           | 64 (39-83)           | 5             | 1593 | 86 (58-97)           | 32 (15-56)           | 0.992                 | 0.094                 |
| CRP ( $\geq 8$ mg/L)               | 5             | 1593 | 89 (69-97)           | 60 (35-80)           | 5             | 1593 | 88 (64-96)           | 32 (15-57)           | 0.851                 | 0.145                 |
| CRP ( $\geq 5$ mg/L)               | 5             | 1593 | 92 (74-98)           | 49 (26-73)           | 5             | 1593 | 87 (63-97)           | 32 (14-57)           | 0.655                 | 0.351                 |
| CXR (abnormal)                     | 8             | 2199 | 74 (64-81)           | 58 (44-70)           | 8             | 2199 | 90 (84-94)           | 22 (14-32)           | 0.002                 | 0.001                 |
| CXR (suggests tuberculosis)        | 8             | 2132 | 65 (55-73)           | 74 (60-84)           | 8             | 2132 | 88 (82-92)           | 24 (14-37)           | <0.0001               | <0.0001               |
| Cough (any)                        | 21            | 5607 | 57 (45-69)           | 67 (55-77)           | 21            | 5607 | 87 (79-92)           | 32 (22-44)           | <0.0001               | <0.0001               |
| Cough ( $\geq 2$ weeks)            | 17            | 4197 | 39 (25-55)           | 80 (67-88)           | 17            | 4197 | 85 (75-92)           | 31 (19-47)           | <0.0001               | <0.0001               |
| Hb ( $< 10$ g/dL)                  | 9             | 1969 | 54 (33-73)           | 74 (56-86)           | 9             | 1969 | 88 (75-95)           | 26 (13-43)           | 0.013                 | 0.002                 |
| Hb ( $< 8$ g/dL)                   | 9             | 1969 | 15 (7-30)            | 95 (89-98)           | 9             | 1969 | 89 (76-95)           | 25 (13-44)           | <0.0001               | <0.0001               |
| BMI ( $< 18.5$ kg/m <sup>2</sup> ) | 18            | 4947 | 34 (23-47)           | 84 (75-90)           | 18            | 4947 | 88 (80-93)           | 31 (21-44)           | <0.0001               | <0.0001               |
| Lymphadenopathy                    | 4             | 1000 | 33 (16-56)           | 89 (75-95)           | 4             | 1000 | 94 (84-98)           | 18 (8-37)            | 0.001                 | 0.001                 |
| W4SS with CRP ( $\geq 10$ mg/L)¶   | 5             | 1593 | 94 (62-99)           | 23 (8-50)            | 5             | 1593 | 83 (36-98)           | 32 (12-61)           | 0.489                 | 0.614                 |
| W4SS with CXR (abnormal)¶          | 8             | 2199 | 96 (92-98)           | 14 (7-24)            | 8             | 2199 | 90 (83-94)           | 22 (12-36)           | 0.042                 | 0.267                 |
| W4SS then CRP ( $\geq 5$ mg/L)¶    | 5             | 1593 | 77 (35-95)           | 66 (36-87)           | 5             | 1593 | 86 (50-98)           | 32 (12-63)           | 0.631                 | 0.144                 |

†Using culture as a reference standard. Direct comparisons are based on all studies that evaluated both the W4SS and relevant screening test

¶For parallel strategies, two screening tests are offered at the same time. For sequential strategies, a second screening test is offered only if the first screening test is positive

Definition of abbreviations: BMI = body mass index, CRP = C-reactive protein, CXR = chest X-ray, Hb = haemoglobin, W4SS = WHO four-symptom screen

Table S8E - Direct comparisons between each test and WHO four-symptom screen for the detection of tuberculosis in participants with CD4 cell count >200 cells/ $\mu$ L†

|                                  | Index Test    |      |                      |                      | W4SS          |      |                      |                      | Difference from W4SS  |                       |
|----------------------------------|---------------|------|----------------------|----------------------|---------------|------|----------------------|----------------------|-----------------------|-----------------------|
|                                  | No of studies | N    | Sensitivity (95% CI) | Specificity (95% CI) | No of studies | N    | Sensitivity (95% CI) | Specificity (95% CI) | Sensitivity (p-value) | Specificity (p-value) |
| CRP ( $\geq 10$ mg/L)            | 5             | 1822 | 62 (35-83)           | 79 (60-91)           | 5             | 1822 | 72 (45-89)           | 43 (23-66)           | 0.581                 | 0.035                 |
| CRP ( $\geq 8$ mg/L)             | 5             | 1822 | 65 (37-86)           | 76 (55-89)           | 5             | 1822 | 72 (44-90)           | 43 (23-66)           | 0.694                 | 0.055                 |
| CRP ( $\geq 5$ mg/L)             | 5             | 1822 | 78 (53-92)           | 65 (43-82)           | 5             | 1822 | 70 (43-88)           | 43 (23-65)           | 0.626                 | 0.182                 |
| CXR (abnormal)                   | 8             | 3886 | 67 (54-78)           | 64 (49-77)           | 8             | 3886 | 79 (68-87)           | 41 (27-57)           | 0.111                 | 0.048                 |
| CXR (suggests tuberculosis)      | 8             | 3909 | 60 (47-72)           | 81 (68-90)           | 8             | 3909 | 77 (65-86)           | 41 (25-59)           | 0.058                 | 0.002                 |
| Cough (any)                      | 21            | 9581 | 52 (40-63)           | 75 (66-83)           | 21            | 9581 | 71 (60-80)           | 50 (38-61)           | 0.018                 | 0.002                 |
| Cough ( $\geq 2$ weeks)          | 17            | 6409 | 34 (22-49)           | 87 (78-92)           | 17            | 6409 | 70 (56-81)           | 48 (34-62)           | 0.001                 | <0.0001               |
| Hb (<10 g/dL)                    | 9             | 3047 | 26 (12-48)           | 84 (72-91)           | 9             | 3047 | 79 (58-91)           | 41 (25-58)           | 0.004                 | 0.001                 |
| Hb (<8 g/dL)                     | 9             | 3047 | 6 (2-18)             | 97 (93-98)           | 9             | 3047 | 79 (56-92)           | 41 (24-59)           | <0.0001               | <0.0001               |
| BMI (<18.5 kg/m <sup>2</sup> )   | 18            | 7356 | 20 (13-30)           | 92 (87-95)           | 18            | 7356 | 74 (64-83)           | 49 (36-62)           | <0.0001               | <0.0001               |
| Lymphadenopathy                  | 4             | 1373 | 30 (12-56)           | 90 (77-96)           | 4             | 1373 | 85 (65-95)           | 34 (16-58)           | 0.008                 | 0.003                 |
| W4SS with CRP ( $\geq 10$ mg/L)¶ | 5             | 1822 | 77 (48-93)           | 35 (15-62)           | 5             | 1822 | 71 (39-90)           | 43 (20-70)           | 0.707                 | 0.665                 |
| W4SS with CXR (abnormal)¶        | 8             | 3886 | 91 (81-96)           | 28 (16-45)           | 8             | 3886 | 82 (67-91)           | 41 (25-59)           | 0.159                 | 0.293                 |
| W4SS then CRP ( $\geq 5$ mg/L)¶  | 5             | 1822 | 61 (21-90)           | 80 (58-92)           | 5             | 1822 | 71 (29-93)           | 43 (21-69)           | 0.731                 | 0.049                 |

†Using culture as a reference standard. Direct comparisons are based on all studies that evaluated both the W4SS and relevant screening test

¶For parallel strategies, two screening tests are offered at the same time. For sequential strategies, a second screening test is offered only if the first screening test is positive

Definition of abbreviations: BMI = body mass index, CRP = C-reactive protein, CXR = chest X-ray, Hb = haemoglobin, W4SS = WHO four-symptom screen

Table S8F - Direct comparisons between each test and WHO four-symptom screen for the detection of tuberculosis in pregnant participants†§

|                                | Index Test    |      |                      |                      | W4SS          |      |                      |                      | Difference from W4SS  |                       |
|--------------------------------|---------------|------|----------------------|----------------------|---------------|------|----------------------|----------------------|-----------------------|-----------------------|
|                                | No of studies | N    | Sensitivity (95% CI) | Specificity (95% CI) | No of studies | N    | Sensitivity (95% CI) | Specificity (95% CI) | Sensitivity (p-value) | Specificity (p-value) |
| CRP (>=10 mg/L)#               | -             | -    | -                    | -                    | -             | -    | -                    | -                    | -                     | -                     |
| CRP (>=8 mg/L)#                | -             | -    | -                    | -                    | -             | -    | -                    | -                    | -                     | -                     |
| CRP (>=5 mg/L)#                | -             | -    | -                    | -                    | -             | -    | -                    | -                    | -                     | -                     |
| CXR (abnormal)                 | 1             | 8    | 75 (11-99)           | 69 (33-91)           | 1             | 8    | 75 (11-99)           | 81 (42-96)           | 1                     | 0.567                 |
| CXR (suggests tuberculosis)    | 1             | 7    | 75 (11-99)           | 93 (42-100)          | 1             | 7    | 75 (11-99)           | 79 (38-96)           | 1                     | 0.465                 |
| Cough (any)                    | 8             | 1933 | 69 (28-93)           | 80 (68-89)           | 8             | 1933 | 83 (39-97)           | 59 (42-74)           | 0.448                 | 0.04                  |
| Cough (>=2 weeks)              | 8             | 1933 | 53 (20-83)           | 92 (84-96)           | 8             | 1933 | 78 (36-95)           | 59 (43-74)           | 0.215                 | 0.001                 |
| Hb (<10 g/dL)                  | 5             | 1350 | 53 (6-95)            | 74 (58-86)           | 5             | 1350 | 92 (7-100)           | 59 (41-75)           | 0.125                 | 0.184                 |
| Hb (<8 g/dL)                   | 5             | 1350 | 0 (0-100)            | 98 (94-99)           | 5             | 1350 | 95 (1-100)           | 59 (40-75)           | 0.001                 | <0.0001               |
| BMI (<18.5 kg/m <sup>2</sup> ) | 7             | 471  | 0 (0-98)             | 97 (93-99)           | 7             | 471  | 100 (0-100)          | 54 (38-69)           | <0.0001               | <0.0001               |
| Lymphadenopathy#               | -             | -    | -                    | -                    | -             | -    | -                    | -                    | -                     | -                     |
| W4SS with CRP (>=10 mg/L)¶#    | -             | -    | -                    | -                    | -             | -    | -                    | -                    | -                     | -                     |
| W4SS with CXR (abnormal)¶¶     | 1             | 8    | 75 (11-99)           | 56 (24-84)           | 1             | 8    | 75 (11-99)           | 81 (42-96)           | 1                     | 0.292                 |
| W4SS then CRP (>=5 mg/L)¶¶#    | -             | -    | -                    | -                    | -             | -    | -                    | -                    | -                     | -                     |

†Using culture as a reference standard. Direct comparisons are based on all studies that evaluated both the W4SS and relevant screening test

§For some analyses, all studies had 0% or 100% sensitivity/specificity; therefore, models may have given unreliable estimates such as 95% CIs that range from 0 to 100

¶¶For parallel strategies, two screening tests are offered at the same time. For sequential strategies, a second screening test is offered only if the first screening test is positive

#Insufficient data to perform meta-analysis

Definition of abbreviations: BMI = body mass index, CRP = C-reactive protein, CXR = chest X-ray, Hb = haemoglobin, W4SS = WHO four-symptom screen

**Table S9 - Additional diagnostic accuracy estimates**

Table S9A - Additional diagnostic accuracy estimates in all participants

| Test                                   | Univariate diagnostic odds ratio |                         |                                 |                        | Positive screen (%)†† |                         | Trivariate GLMM††† |                  | Metaregression†    |            |
|----------------------------------------|----------------------------------|-------------------------|---------------------------------|------------------------|-----------------------|-------------------------|--------------------|------------------|--------------------|------------|
|                                        | Estimate (95% CI)                | I <sup>2</sup> (95% CI) | Trim-and-fill estimate (95% CI) | Egger's test (p-value) | Estimate (95% CI)     | I <sup>2</sup> (95% CI) | PPV (95% CI)       | NPV (95% CI)     | Reference standard | Prevalence |
|                                        |                                  |                         |                                 |                        |                       |                         |                    |                  | P-value            | P-value    |
| <b>W4SS</b>                            | 3.21 (2.61-3.95)                 | 27 (0-57)               | 3.39 (2.74-4.20)                | 0.16                   | 60 (45-73)            | 100 (99-100)            | 11.6 (9.3-14.3)    | 96.2 (94.9-97.2) | 0.63               | 0.19       |
| <b>CRP (&gt;=10 mg/L)</b>              | 9.06 (5.55-14.78)                | 63 (3-86)               | 13.83 (8.18-23.36)              | 0.21                   | 32 (20-47)            | 97 (95-98)              | 20.7 (10.4-37.1)   | 96.8 (94.7-98.1) | -                  | 0.23       |
| <b>CRP (&gt;=8 mg/L)</b>               | 8.93 (5.11-15.63)                | 70 (25-88)              | 14.15 (7.88-25.38)              | 0.38                   | 35 (22-50)            | 97 (96-98)              | 20.5 (11.5-33.9)   | 97.1 (94.9-98.3) | -                  | 0.35       |
| <b>CRP (&gt;=5 mg/L)</b>               | 8.79 (5.06-15.26)                | 60 (0-85)               | 12.33 (6.80-22.33)              | 0.3                    | 45 (32-59)            | 98 (96-98)              | 16.7 (8.4-30.6)    | 97.5 (95.6-98.6) | -                  | 0.28       |
| <b>CXR (abnormal)</b>                  | 4.07 (2.97-5.58)                 | 45 (0-76)               | 4.07 (2.97-5.58)                | 0.84                   | 41 (32-52)            | 99 (98-99)              | 14.0 (9.5-20.2)    | 96.1 (93.4-97.7) | 0.08               | 0.27       |
| <b>CXR (suggests tuberculosis)</b>     | 6.37 (3.89-10.43)                | 81 (63-90)              | 6.37 (3.92-10.35)               | 0.95                   | 26 (17-38)            | 99 (99-99)              | 22.6 (17.6-28.5)   | 95.4 (93.1-96.9) | 0.12               | 0.11       |
| <b>Cough (any)</b>                     | 3.23 (2.76-3.77)                 | 28 (0-58)               | 3.23 (2.76-3.77)                | 0.98                   | 30 (23-38)            | 99 (98-99)              | 15.1 (12.4-18.2)   | 95.3 (93.5-96.5) | 0.84               | <0.0001    |
| <b>Cough (&gt;=2 weeks)</b>            | 3.32 (2.62-4.20)                 | 55 (22-74)              | 2.95 (2.31-3.76)                | 0.41                   | 18 (12-25)            | 98 (97-98)              | 19.2 (15.9-22.9)   | 94.1 (91.7-95.8) | 0.4                | <0.0001    |
| <b>Hb (&lt;10 g/dL)</b>                | 3.03 (2.31-3.97)                 | 22 (0-63)               | 2.96 (2.25-3.89)                | 0.96                   | 22 (16-30)            | 97 (96-98)              | 12.5 (6.6-22.4)    | 95.2 (91.3-97.4) | 0.4                | 0.93       |
| <b>Hb (&lt;8 g/dL)</b>                 | 3.25 (1.73-6.09)                 | 60 (18-81)              | 4.33 (2.22-8.44)                | 0.54                   | 5 (3-8)               | 94 (90-96)              | 15.5 (7.2-30.3)    | 93.9 (89.1-96.7) | 0.12               | 0.63       |
| <b>BMI (&lt;18.5 kg/m<sup>2</sup>)</b> | 3.11 (2.65-3.64)                 | 9 (0-45)                | 3.45 (2.83-4.20)                | 0.72                   | 13 (9-18)             | 98 (97-98)              | 18.3 (13.4-24.5)   | 93.6 (91.1-95.5) | 0.65               | 0.26       |
| <b>Lymphadenopathy</b>                 | 3.96 (2.72-5.77)                 | 0 (0-83)                | 4.81 (3.24-7.15)                | 0.93                   | 12 (5-26)             | 99 (98-99)              | 18.3 (8.1-36.3)    | 94.5 (89.0-97.3) | 0.21               | 0.32       |
| <b>W4SS with CRP (&gt;=10 mg/L)</b>    | 3.61 (2.41-5.40)                 | 0 (0-71)                | 3.61 (2.41-5.40)                | 0.9                    | 71 (45-88)            | 99 (99-100)             | 12.6 (8.1-19.0)    | 96.5 (93.7-98.1) | -                  | 0.28       |
| <b>W4SS with CXR (abnormal)</b>        | 5.22 (3.61-7.54)                 | 0 (0-62)                | 5.44 (3.79-7.83)                | 0.38                   | 81 (65-91)            | 99 (99-99)              | 10.0 (6.9-14.4)    | 97.8 (94.6-99.2) | 0.91               | 0.04       |
| <b>W4SS then CRP (&gt;=5 mg/L)</b>     | 8.49 (4.69-15.37)                | 72 (30-89)              | 8.95 (5.04-15.90)               | 0.66                   | 30 (13-54)            | 98 (96-99)              | 21.9 (13.9-33.0)   | 96.7 (94.6-98.0) | -                  | 0.61       |
| <b>W4SS then Xpert*</b>                | 142.47 (95.22-213.16)            | 32 (0-65)               | 142.49 (95.27-213.13)           | 0.37                   | 5 (3-9)               | 93 (90-95)              | 87.9 (75.4-94.5)   | 96.6 (94.6-97.9) | 0.66               | 0.54       |
| <b>Xpert alone*</b>                    | 165.89 (95.97-286.77)            | 62 (29-80)              | 273.62 (157.19-476.31)          | 0.56                   | 7 (4-10)              | 92 (88-95)              | 81.1 (66.8-90.1)   | 97.5 (95.5-98.6) | 0.65               | 0.78       |

†For the meta-regressions, the outcome variable was the diagnostic odds ratio

††Calculated using meta-analysis of proportions. We used a generalized linear mixed model with logit transformation in preference to protocol specified DerSimonian and Laird random effects model for proportions with variance stabilization by applying the Freeman-Tukey double arcsine transformation

†††Pooled using a trivariate generalized linear mixed model that jointly models diagnostic test prevalence and predictive values

\*Estimates for entire algorithm using total Xpert (sputum and/or non-sputum Xpert result)

Definition of abbreviations: BMI = body mass index, CRP = C-reactive protein, CXR = chest X-ray, GLMM = generalized linear mixed model, Hb = haemoglobin, NPV = negative predictive value, PPV = positive predictive value, W4SS = WHO four-symptom screen



Table S9B - Additional diagnostic accuracy estimates in outpatients (On ART)

| Test                                   | Univariate diagnostic odds ratio |                         |                                 |                        | Positive screen (%)†† |                         | Trivariate GLMM††† |                  | Metaregression†    |            |
|----------------------------------------|----------------------------------|-------------------------|---------------------------------|------------------------|-----------------------|-------------------------|--------------------|------------------|--------------------|------------|
|                                        | Estimate (95% CI)                | I <sup>2</sup> (95% CI) | Trim-and-fill estimate (95% CI) | Egger's test (p-value) | Estimate (95% CI)     | I <sup>2</sup> (95% CI) | PPV (95% CI)       | NPV (95% CI)     | Reference standard | Prevalence |
|                                        |                                  |                         |                                 |                        |                       |                         |                    |                  | P-value            | P-value    |
| <b>W4SS</b>                            | 3.07 (2.09-4.52)                 | 0 (0-63)                | 3.80 (2.50-5.79)                | 0.38                   | 30 (16-50)            | 99 (98-99)              | 6.0 (3.9-9.1)      | 97.9 (96.7-98.7) | 0.93               | 0.41       |
| <b>CRP (&gt;=10 mg/L)</b>              | 2.36 (0.26-21.70)                | -                       | -                               | -                      | 10 (7-13)             | -                       | 2.7 ( 0.1-13.8)    | 98.8 (97.0-99.5) | -                  | -          |
| <b>CRP (&gt;=8 mg/L)</b>               | 5.45 (0.88-33.56)                | -                       | -                               | -                      | 11 (8-15)             | -                       | 4.7 ( 1.3-15.5)    | 99.1 (97.4-99.7) | -                  | -          |
| <b>CRP (&gt;=5 mg/L)</b>               | 2.63 (0.43-16.03)                | -                       | -                               | -                      | 20 (17-25)            | -                       | 2.6 (0.7-8.9)      | 99.0 (97.1-99.7) | -                  | -          |
| <b>CXR (abnormal)</b>                  | 4.31 (2.21-8.39)                 | 22 (0-88)               | 4.31 (2.22-8.35)                | 0.64                   | 38 (26-52)            | 98 (97-99)              | 5.9 (4.3-8.0)      | 98.7 (97.4-99.3) | 0.15               | 0.44       |
| <b>CXR (suggests tuberculosis)</b>     | 8.84 (4.39-17.80)                | 37 (0-78)               | 8.84 (4.44-17.58)               | 0.8                    | 24 (12-41)            | 99 (98-99)              | 11.3 (8.7-14.5)    | 98.5 (97.3-99.2) | 0.16               | 0.12       |
| <b>Cough (any)</b>                     | 3.16 (2.11-4.74)                 | 0 (0-65)                | 3.16 (2.11-4.74)                | 0.74                   | 18 (11-28)            | 97 (96-98)              | 7.1 (4.9-10.1)     | 97.8 (96.4-98.6) | 0.21               | 0.21       |
| <b>Cough (&gt;=2 weeks)</b>            | 3.23 (1.53-6.82)                 | 0 (0-72)                | 2.27 (1.16-4.46)                | 0.12                   | 7 (2-22)              | 98 (96-98)              | 9.6 (5.9-15.2)     | 97.4 (95.0-98.6) | 0.19               | 0.2        |
| <b>Hb (&lt;10 g/dL)</b>                | 5.42 (2.19-13.45)                | 0 (0-87)                | 5.42 (2.19-13.45)               | 0.76                   | 19 (10-31)            | 94 (88-97)              | 7.2 (3.4-14.7)     | 98.7 (97.3-99.3) | 0.59               | 0.81       |
| <b>Hb (&lt;8 g/dL)</b>                 | 5.23 (1.62-16.91)                | 0 (0-83)                | 8.22 (3.08-21.89)               | 0.15                   | 6 (4-9)               | 54 (0-85)               | 6.7 (1.7-22.7)     | 98.0 (96.3-98.9) | 0.96               | 0.46       |
| <b>BMI (&lt;18.5 kg/m<sup>2</sup>)</b> | 2.61 (1.56-4.37)                 | 0 (0-0)                 | 2.61 (1.56-4.37)                | 0.44                   | 7 (4-13)              | 95 (91-97)              | 6.6 (3.5-12.1)     | 97.4 (96.1-98.2) | 0.35               | 0.65       |
| <b>Lymphadenopathy</b>                 | 3.63 (0.71-18.45)                | -                       | -                               | -                      | 8 (5-11)              | -                       | 7.7 ( 2.1-24.1)    | 97.8 (95.4-98.9) | -                  | -          |
| <b>W4SS with CRP (&gt;=10 mg/L)</b>    | 0.97 (0.11-8.81)                 | -                       | -                               | -                      | 20 (17-25)            | -                       | 1.3 (0.1-6.9)      | 98.7 (96.7-99.5) | -                  | -          |
| <b>W4SS with CXR (abnormal)</b>        | 3.69 (1.96-6.93)                 | 0 (0-61)                | 3.69 (1.96-6.93)                | 0.96                   | 68 (46-84)            | 99 (99-99)              | 4.7 (3.4-6.4)      | 98.8 (96.9-99.5) | 0.79               | 0.41       |
| <b>W4SS then CRP (&gt;=5 mg/L)</b>     | 2.12 (0.11-40.08)                | -                       | -                               | -                      | 4 (2-6)               | -                       | 0.0 ( 0.0-20.4)    | 98.6 (96.8-99.4) | -                  | -          |
| <b>W4SS then Xpert*</b>                | 82.01 (14.71-457.12)             | 65 (0-88)               | 230.45 (35.98-1476.17)          | 0.82                   | 1 (0-4)               | 88 (71-95)              | 78.3 (22.7-97.8)   | 98.9 (98.4-99.2) | -                  | 0.34       |
| <b>Xpert alone*</b>                    | 88.54 (10.76-728.44)             | 81 (51-93)              | 442.60 (45.58-4298.07)          | 0.46                   | 2 (1-4)               | 82 (54-93)              | 42.7 (20.7-68.2)   | 99.2 (98.2-99.7) | -                  | 0.85       |

†For the meta-regressions, the outcome variable was the diagnostic odds ratio

††Calculated using meta-analysis of proportions. We used a generalized linear mixed model with logit transformation in preference to protocol specified DerSimonian and Laird random effects model for proportions with variance stabilization by applying the Freeman-Tukey double arcsine transformation

†††Pooled using a trivariate generalized linear mixed model that jointly models diagnostic test prevalence and predictive values

\*Estimates for entire algorithm using total Xpert (sputum and/or non-sputum Xpert result)

Definition of abbreviations: BMI = body mass index, CRP = C-reactive protein, CXR = chest X-ray, GLMM = generalized linear mixed model, Hb = haemoglobin, NPV = negative predictive value, PPV = positive predictive value, W4SS = WHO four-symptom screen

Table S9C - Additional diagnostic accuracy estimates in outpatients (Not on ART)

| Test                                   | Univariate diagnostic odds ratio |                         |                                 |                        | Positive screen (%)†† |                         | Trivariate GLMM††† |                  | Metaregression†    |            |
|----------------------------------------|----------------------------------|-------------------------|---------------------------------|------------------------|-----------------------|-------------------------|--------------------|------------------|--------------------|------------|
|                                        | Estimate (95% CI)                | I <sup>2</sup> (95% CI) | Trim-and-fill estimate (95% CI) | Egger's test (p-value) | Estimate (95% CI)     | I <sup>2</sup> (95% CI) | PPV (95% CI)       | NPV (95% CI)     | Reference standard | Prevalence |
|                                        |                                  |                         |                                 |                        |                       |                         |                    |                  | P-value            | P-value    |
| <b>W4SS</b>                            | 3.14 (2.61-3.78)                 | 0 (0-46)                | 3.11 (2.59-3.75)                | 0.72                   | 65 (52-76)            | 99 (99-99)              | 12.8 (10.5-15.6)   | 95.8 (94.4-96.8) | 0.63               | 0.78       |
| <b>CRP (&gt;=10 mg/L)</b>              | 9.66 (5.97-15.65)                | 67 (3-89)               | 13.79 (8.17-23.28)              | 0.35                   | 40 (33-46)            | 91 (82-96)              | 28.4 (22.9-34.6)   | 95.9 (94.6-96.9) | -                  | 0.66       |
| <b>CRP (&gt;=8 mg/L)</b>               | 9.30 (5.10-16.95)                | 77 (37-92)              | 14.05 (7.45-26.52)              | 0.39                   | 43 (36-50)            | 92 (84-96)              | 26.6 (21.1-32.9)   | 96.1 (94.8-97.1) | -                  | 0.47       |
| <b>CRP (&gt;=5 mg/L)</b>               | 9.72 (5.65-16.70)                | 62 (0-87)               | 14.97 (8.02-27.93)              | 0.61                   | 52 (46-59)            | 92 (86-96)              | 23.3 (18.8-28.4)   | 96.8 (95.3-97.8) | -                  | 0.95       |
| <b>CXR (abnormal)</b>                  | 4.08 (3.02-5.51)                 | 28 (0-68)               | 4.08 (3.02-5.50)                | 0.93                   | 42 (31-52)            | 98 (97-98)              | 19.0 (15.3-23.2)   | 95.0 (91.8-96.9) | 0.44               | 0.01       |
| <b>CXR (suggests tuberculosis)</b>     | 5.98 (3.42-10.46)                | 81 (64-90)              | 5.49 (3.23-9.32)                | 0.99                   | 26 (17-38)            | 98 (97-99)              | 28.3 (24.6-32.4)   | 93.7 (91.2-95.6) | 0.29               | <0.0001    |
| <b>Cough (any)</b>                     | 3.12 (2.74-3.56)                 | 0 (0-41)                | 2.95 (2.57-3.39)                | 0.29                   | 33 (27-40)            | 98 (97-98)              | 16.9 (14.0-20.1)   | 94.4 (92.5-95.9) | 0.46               | 0.06       |
| <b>Cough (&gt;=2 weeks)</b>            | 3.26 (2.61-4.06)                 | 48 (5-71)               | 2.92 (2.34-3.65)                | 0.17                   | 21 (15-28)            | 97 (96-98)              | 20.6 (17.6-23.9)   | 93.3 (90.9-95.1) | 0.72               | 0.01       |
| <b>Hb (&lt;10 g/dL)</b>                | 2.88 (2.19-3.80)                 | 24 (0-66)               | 2.88 (2.19-3.80)                | 0.41                   | 24 (17-32)            | 96 (95-98)              | 13.3 (6.2-26.5)    | 94.2 (89.5-96.9) | 0.55               | 0.44       |
| <b>Hb (&lt;8 g/dL)</b>                 | 3.11 (1.48-6.52)                 | 69 (31-86)              | 3.11 (1.50-6.43)                | 0.74                   | 5 (3-8)               | 93 (90-96)              | 16.6 (6.3-37.0)    | 92.6 (86.9-95.9) | 0.08               | 0.91       |
| <b>BMI (&lt;18.5 kg/m<sup>2</sup>)</b> | 3.05 (2.54-3.66)                 | 17 (0-53)               | 2.86 (2.37-3.46)                | 0.7                    | 15 (10-21)            | 97 (97-98)              | 21.8 (16.7-28.0)   | 92.1 (89.5-94.1) | 0.59               | 0.34       |
| <b>Lymphadenopathy</b>                 | 4.01 (2.73-5.89)                 | 0 (0-83)                | 3.43 (2.37-4.98)                | 0.85                   | 11 (4-26)             | 98 (97-99)              | 19.5 (7.1-43.6)    | 94.8 (87.7-97.9) | 0.22               | 0.35       |
| <b>W4SS with CRP (&gt;=10 mg/L)</b>    | 3.78 (2.51-5.70)                 | 0 (0-67)                | 3.44 (2.36-5.00)                | 0.17                   | 82 (70-90)            | 98 (97-99)              | 16.3 (14.9-17.7)   | 95.5 (93.3-97.0) | -                  | 0.79       |
| <b>W4SS with CXR (abnormal)</b>        | 4.85 (3.07-7.67)                 | 0 (0-66)                | 5.73 (3.69-8.90)                | 0.22                   | 83 (69-92)            | 98 (97-98)              | 12.5 (9.1-16.8)    | 97.2 (92.8-99.0) | 0.82               | 0.1        |
| <b>W4SS then CRP (&gt;=5 mg/L)</b>     | 8.94 (4.86-16.45)                | 78 (39-92)              | 8.94 (4.88-16.38)               | 0.9                    | 42 (35-50)            | 93 (86-96)              | 27.0 (23.3-31.0)   | 96.0 (94.3-97.2) | -                  | 0.88       |
| <b>W4SS then Xpert*</b>                | 154.61 (111.63-214.14)           | 0 (0-44)                | 154.61 (111.63-214.14)          | 0.21                   | 8 (6-10)              | 82 (68-89)              | 83.7 (71.7-91.2)   | 96.6 (94.2-98.0) | 0.32               | 0.85       |
| <b>Xpert alone*</b>                    | 184.61 (120.87-281.97)           | 30 (0-66)               | 184.60 (120.90-281.86)          | 0.99                   | 9 (7-11)              | 74 (53-86)              | 84.0 (74.7-90.3)   | 97.7 (95.1-99.0) | 0.29               | 0.36       |

†For the meta-regressions, the outcome variable was the diagnostic odds ratio

††Calculated using meta-analysis of proportions. We used a generalized linear mixed model with logit transformation in preference to protocol specified DerSimonian and Laird random effects model for proportions with variance stabilization by applying the Freeman-Tukey double arcsine transformation

†††Pooled using a trivariate generalized linear mixed model that jointly models diagnostic test prevalence and predictive values

\*Estimates for entire algorithm using total Xpert (sputum and/or non-sputum Xpert result)

Definition of abbreviations: BMI = body mass index, CRP = C-reactive protein, CXR = chest X-ray, GLMM = generalized linear mixed model, Hb = haemoglobin, NPV = negative predictive value, PPV = positive predictive value, W4SS = WHO four-symptom screen

Table S9D - Additional diagnostic accuracy estimates in participants with a CD4 cell count  $\leq 200$  cells/ $\mu$ L

| Test                                                 | Univariate diagnostic odds ratio |                         |                                 |                        | Positive screen (%)†† |                         | Trivariate GLMM††† |                  | Metaregression†    |            |
|------------------------------------------------------|----------------------------------|-------------------------|---------------------------------|------------------------|-----------------------|-------------------------|--------------------|------------------|--------------------|------------|
|                                                      | Estimate (95% CI)                | I <sup>2</sup> (95% CI) | Trim-and-fill estimate (95% CI) | Egger's test (p-value) | Estimate (95% CI)     | I <sup>2</sup> (95% CI) | PPV (95% CI)       | NPV (95% CI)     | Reference standard | Prevalence |
|                                                      |                                  |                         |                                 |                        |                       |                         |                    |                  | P-value            | P-value    |
| <b>W4SS</b>                                          | 2.98 (2.33-3.81)                 | 0 (0-42)                | 3.28 (2.54-4.24)                | 0.29                   | 70 (55-82)            | 98 (98-99)              | 17.5 (14.7-20.7)   | 94.0 (92.0-95.5) | 0.29               | 0.46       |
| <b>CRP (<math>\geq 10</math> mg/L)</b>               | 12.06 (7.99-18.21)               | 9 (0-81)                | 14.72 (9.32-23.24)              | 0.02                   | 46 (32-60)            | 91 (82-96)              | 37.5 (31.7-43.7)   | 95.4 (93.7-96.6) | -                  | 0.1        |
| <b>CRP (<math>\geq 8</math> mg/L)</b>                | 13.34 (8.96-19.87)               | 1 (0-80)                | 15.50 (10.22-23.51)             | 0.04                   | 50 (35-64)            | 92 (84-96)              | 36.0 (29.8-42.8)   | 96.0 (94.0-97.3) | -                  | 0.59       |
| <b>CRP (<math>\geq 5</math> mg/L)</b>                | 9.69 (5.15-18.26)                | 35 (0-76)               | 12.41 (6.74-22.87)              | 0.26                   | 58 (43-72)            | 94 (88-97)              | 31.7 (26.4-37.5)   | 96.1 (93.6-97.6) | -                  | 0.55       |
| <b>CXR (abnormal)</b>                                | 3.78 (2.83-5.05)                 | 0 (0-66)                | 4.12 (3.08-5.50)                | 0.44                   | 46 (37-56)            | 96 (94-98)              | 20.4 (15.7-26.2)   | 93.7 (90.6-95.9) | 0.23               | 0.4        |
| <b>CXR (suggests tuberculosis)</b>                   | 4.95 (3.15-7.78)                 | 61 (16-82)              | 5.52 (3.53-8.64)                | 0.7                    | 32 (23-42)            | 96 (95-98)              | 29.7 (25.8-33.9)   | 92.3 (89.7-94.3) | 0.24               | 0.1        |
| <b>Cough (any)</b>                                   | 2.63 (2.24-3.09)                 | 0 (0-40)                | 2.65 (2.26-3.11)                | 0.98                   | 37 (30-45)            | 96 (95-97)              | 21.8 (18.6-25.3)   | 91.4 (88.9-93.5) | 0.77               | 0.01       |
| <b>Cough (<math>\geq 2</math> weeks)</b>             | 2.46 (1.93-3.13)                 | 34 (0-64)               | 2.29 (1.78-2.96)                | 0.41                   | 25 (18-33)            | 94 (92-96)              | 27.1 (23.1-31.4)   | 89.0 (85.9-91.4) | 0.1                | <0.0001    |
| <b>Hb (<math>&lt; 10</math> g/dL)</b>                | 3.25 (2.21-4.79)                 | 37 (0-71)               | 3.13 (2.09-4.69)                | 0.71                   | 30 (22-39)            | 94 (90-96)              | 20.4 (13.1-30.3)   | 92.3 (88.1-95.0) | 0.97               | 0.64       |
| <b>Hb (<math>&lt; 8</math> g/dL)</b>                 | 3.49 (1.55-7.87)                 | 64 (27-82)              | 4.65 (1.93-11.16)               | 0.7                    | 7 (5-10)              | 83 (70-91)              | 26.6 (14.0-44.7)   | 89.9 (85.1-93.3) | 0.3                | 0.9        |
| <b>BMI (<math>&lt; 18.5</math> kg/m<sup>2</sup>)</b> | 2.57 (2.15-3.09)                 | 0 (0-43)                | 2.41 (2.03-2.87)                | 0.61                   | 19 (14-26)            | 96 (95-97)              | 24.6 (19.1-31.0)   | 89.1 (86.3-91.4) | 0.99               | 0.91       |
| <b>Lymphadenopathy#</b>                              | 3.97 (2.36-6.68)                 | 0 (0-80)                | 3.81 (2.31-6.28)                | 0.59                   | 14 (6-30)             | 97 (95-98)              | -                  | -                | 0.32               | 0.52       |
| <b>W4SS with CRP (<math>\geq 10</math> mg/L)</b>     | 5.14 (2.11-12.54)                | 14 (0-82)               | 5.15 (2.22-11.96)               | 0.63                   | 80 (56-92)            | 96 (93-98)              | 21.3 (17.0-26.4)   | 95.8 (91.6-98.0) | -                  | 0.15       |
| <b>W4SS with CXR (abnormal)</b>                      | 3.90 (2.25-6.79)                 | 0 (0-36)                | 5.11 (3.14-8.31)                | 0.33                   | 88 (77-94)            | 97 (96-98)              | 14.4 (11.0-18.7)   | 96.7 (90.5-98.9) | 0.82               | 0.29       |
| <b>W4SS then CRP (<math>\geq 5</math> mg/L)</b>      | 7.50 (3.88-14.48)                | 57 (0-84)               | 12.80 (6.37-25.74)              | 0.39                   | 41 (17-70)            | 85 (67-93)              | 32.5 (27.0-38.6)   | 94.7 (91.5-96.8) | -                  | 0.88       |
| <b>W4SS then Xpert*</b>                              | 127.84 (86.56-188.80)            | 0 (0-52)                | 142.03 (90.33-223.30)           | 0.11                   | 12 (9-14)             | 68 (42-82)              | 85.4 (73.1-92.6)   | 95.4 (92.6-97.1) | 0.47               | 0.29       |
| <b>Xpert alone*</b>                                  | 167.10 (100.59-277.58)           | 25 (0-63)               | 218.91 (123.79-387.11)          | 0.41                   | 13 (10-16)            | 63 (31-80)              | 86.0 (74.3-92.9)   | 96.6 (94.0-98.1) | 0.73               | 0.63       |

†For the meta-regressions, the outcome variable was the diagnostic odds ratio

††Calculated using meta-analysis of proportions. We used a generalized linear mixed model with logit transformation in preference to protocol specified DerSimonian and Laird random effects model for proportions with variance stabilization by applying the Freeman-Tukey double arcsine transformation

†††Pooled using a trivariate generalized linear mixed model that jointly models diagnostic test prevalence and predictive values

#Trivariate random-effects model did not converge

\*Estimates for entire algorithm using total Xpert (sputum and/or non-sputum Xpert result)

Definition of abbreviations: BMI = body mass index, CRP = C-reactive protein, CXR = chest X-ray, GLMM = generalized linear mixed model, Hb = haemoglobin, NPV = negative predictive value, PPV = positive predictive value, W4SS = WHO four-symptom screen

Table S9E - Additional diagnostic accuracy estimates in participants with a CD4 cell count >200 cells/ $\mu$ L

| Test                                   | Univariate diagnostic odds ratio |                         |                                 |                        | Positive screen (%)†† |                         | Trivariate GLMM††† |                  | Metaregression†    |            |
|----------------------------------------|----------------------------------|-------------------------|---------------------------------|------------------------|-----------------------|-------------------------|--------------------|------------------|--------------------|------------|
|                                        | Estimate (95% CI)                | I <sup>2</sup> (95% CI) | Trim-and-fill estimate (95% CI) | Egger's test (p-value) | Estimate (95% CI)     | I <sup>2</sup> (95% CI) | PPV (95% CI)       | NPV (95% CI)     | Reference standard | Prevalence |
|                                        |                                  |                         |                                 |                        |                       |                         |                    |                  | P-value            | P-value    |
| <b>W4SS</b>                            | 2.33 (1.73-3.12)                 | 26 (0-57)               | 2.26 (1.69-3.02)                | 0.8                    | 52 (38-65)            | 99 (99-99)              | 7.3 (5.8-9.1)      | 96.8 (95.5-97.8) | 0.94               | 0.06       |
| <b>CRP (&gt;=10 mg/L)</b>              | 6.23 (3.64-10.65)                | 36 (0-76)               | 6.23 (3.64-10.65)               | 0.97                   | 23 (14-37)            | 95 (92-97)              | 16.8 (11.2-24.3)   | 97.2 (94.7-98.5) | -                  | 0.81       |
| <b>CRP (&gt;=8 mg/L)</b>               | 5.81 (3.27-10.31)                | 41 (0-78)               | 5.81 (3.27-10.31)               | 0.99                   | 27 (16-40)            | 96 (92-98)              | 15.1 (9.7-22.8)    | 97.2 (94.9-98.5) | -                  | 0.93       |
| <b>CRP (&gt;=5 mg/L)</b>               | 6.56 (4.14-10.42)                | 0 (0-71)                | 6.56 (4.14-10.42)               | 0.8                    | 37 (26-50)            | 95 (92-97)              | 12.8 (8.0-20.0)    | 97.8 (96.2-98.7) | -                  | 0.59       |
| <b>CXR (abnormal)</b>                  | 3.60 (2.33-5.56)                 | 23 (0-65)               | 3.60 (2.33-5.56)                | 0.91                   | 37 (28-48)            | 98 (96-98)              | 8.3 (5.0-13.5)     | 97.5 (95.0-98.7) | 0.25               | 0.11       |
| <b>CXR (suggests tuberculosis)</b>     | 6.51 (3.79-11.16)                | 52 (0-78)               | 6.50 (3.82-11.06)               | 0.82                   | 22 (13-33)            | 98 (98-99)              | 15.3 (10.6-21.7)   | 97.1 (95.2-98.3) | 0.13               | 0.12       |
| <b>Cough (any)</b>                     | 3.16 (2.51-3.99)                 | 13 (0-47)               | 3.16 (2.51-3.99)                | 0.94                   | 26 (20-34)            | 98 (97-98)              | 10.1 (8.1-12.4)    | 96.9 (95.7-97.8) | 0.52               | 0.02       |
| <b>Cough (&gt;=2 weeks)</b>            | 3.45 (2.48-4.81)                 | 29 (0-60)               | 3.45 (2.48-4.81)                | 0.98                   | 15 (10-22)            | 96 (94-97)              | 13.0 (10.2-16.4)   | 96.1 (94.6-97.3) | 0.57               | 0.01       |
| <b>Hb (&lt;10 g/dL)</b>                | 1.99 (1.29-3.07)                 | 0 (0-64)                | 1.99 (1.29-3.07)                | 0.99                   | 16 (12-22)            | 92 (86-95)              | 6.7 (3.2-13.5)     | 96.1 (92.7-98.0) | 0.31               | 0.74       |
| <b>Hb (&lt;8 g/dL)</b>                 | 2.87 (1.40-5.89)                 | 0 (0-30)                | 3.48 (1.76-6.85)                | 0.51                   | 4 (2-6)               | 86 (75-92)              | 7.4 (2.7-18.6)     | 95.9 (92.2-97.9) | 0.45               | 0.59       |
| <b>BMI (&lt;18.5 kg/m<sup>2</sup>)</b> | 2.86 (2.17-3.75)                 | 0 (0-0)                 | 2.90 (2.21-3.81)                | 0.55                   | 9 (6-13)              | 95 (93-96)              | 11.3 (7.4-16.8)    | 95.7 (94.0-96.9) | 0.47               | 0.72       |
| <b>Lymphadenopathy</b>                 | 4.02 (2.26-7.16)                 | 0 (0-0)                 | 4.02 (2.26-7.16)                | 0.73                   | 11 (4-29)             | 97 (96-98)              | 12.5 (4.3-31.3)    | 96.2 (92.1-98.2) | 0.69               | 0.55       |
| <b>W4SS with CRP (&gt;=10 mg/L)</b>    | 1.66 (1.01-2.72)                 | 0 (0-74)                | 1.42 (0.87-2.31)                | 0.17                   | 66 (40-85)            | 99 (98-99)              | 7.3 (4.4-11.9)     | 96.0 (91.8-98.1) | -                  | 0.98       |
| <b>W4SS with CXR (abnormal)</b>        | 3.56 (1.94-6.54)                 | 19 (0-62)               | 4.02 (1.85-8.71)                | 0.33                   | 73 (58-84)            | 99 (98-99)              | 6.2 (3.9-9.9)      | 98.4 (96.2-99.4) | 0.62               | 0.13       |
| <b>W4SS then CRP (&gt;=5 mg/L)</b>     | 7.56 (3.48-16.40)                | 57 (0-84)               | 5.24 (2.61-10.50)               | 0.52                   | 22 (10-43)            | 96 (93-98)              | 15.0 (8.9-24.2)    | 97.7 (95.7-98.8) | -                  | 0.81       |
| <b>W4SS then Xpert*</b>                | 128.84 (74.31-223.38)            | 10 (0-50)               | 149.81 (83.48-268.82)           | 0.55                   | 3 (2-5)               | 83 (72-90)              | 82.5 (67.5-91.5)   | 97.1 (95.3-98.2) | 0.05               | 0.09       |
| <b>Xpert alone*</b>                    | 145.18 (78.32-269.13)            | 36 (0-68)               | 151.58 (83.62-274.78)           | 0.78                   | 4 (3-6)               | 78 (62-87)              | 77.0 (66.0-85.2)   | 97.9 (96.0-98.9) | 0.02               | 0.03       |

†For the meta-regressions, the outcome variable was the diagnostic odds ratio

††Calculated using meta-analysis of proportions. We used a generalized linear mixed model with logit transformation in preference to protocol specified DerSimonian and Laird random effects model for proportions with variance stabilization by applying the Freeman-Tukey double arcsine transformation

†††Pooled using a trivariate generalized linear mixed model that jointly models diagnostic test prevalence and predictive values

\*Estimates for entire algorithm using total Xpert (sputum and/or non-sputum Xpert result)

Definition of abbreviations: BMI = body mass index, CRP = C-reactive protein, CXR = chest X-ray, GLMM = generalized linear mixed model, Hb = haemoglobin, NPV = negative predictive value, PPV = positive predictive value, W4SS = WHO four-symptom screen

Table S9F - Additional diagnostic accuracy estimates in pregnant participants

| Test                                   | Univariate diagnostic odds ratio |                         |                                 |                        | Positive screen (%)†† |                         | Trivariate GLMM††† |                     | Metaregression†    |            |
|----------------------------------------|----------------------------------|-------------------------|---------------------------------|------------------------|-----------------------|-------------------------|--------------------|---------------------|--------------------|------------|
|                                        | Estimate (95% CI)                | I <sup>2</sup> (95% CI) | Trim-and-fill estimate (95% CI) | Egger's test (p-value) | Estimate (95% CI)     | I <sup>2</sup> (95% CI) | PPV (95% CI)       | NPV (95% CI)        | Reference standard | Prevalence |
|                                        |                                  |                         |                                 |                        |                       |                         |                    |                     | P-value            | P-value    |
| <b>W4SS</b>                            | 2.22 (1.23-4.00)                 | 0 (0-0)                 | 2.27 (1.27-4.04)                | 0.89                   | 43 (26-62)            | 94 (90-96)              | 5.8 (3.4-9.8)      | 98.7 (92.8-99.8)    | 0.86               | 0.88       |
| <b>CRP (&gt;=10 mg/L)#</b>             | -                                | -                       | -                               | -                      | -                     | -                       | -                  | -                   | -                  | -          |
| <b>CRP (&gt;=8 mg/L)#</b>              | -                                | -                       | -                               | -                      | -                     | -                       | -                  | -                   | -                  | -          |
| <b>CRP (&gt;=5 mg/L)#</b>              | -                                | -                       | -                               | -                      | -                     | -                       | -                  | -                   | -                  | -          |
| <b>CXR (abnormal)</b>                  | 6.60 (0.19-225.79)               | -                       | -                               | -                      | 38 (12-72)            | -                       | 33.3 ( 1.7-79.2)   | 100.0 ( 56.6-100.0) | -                  | -          |
| <b>CXR (suggests tuberculosis)</b>     | 39.00 (0.53-2883.60)             | -                       | -                               | -                      | 14 (2-58)             | -                       | 100.0 ( 5.1-100.0) | 100.0 ( 61.0-100.0) | -                  | -          |
| <b>Cough (any)</b>                     | 4.05 (2.15-7.61)                 | 0 (0-0)                 | 3.73 (2.03-6.85)                | 0.18                   | 20 (13-32)            | 90 (82-94)              | 10.0 (5.5-17.5)    | 98.6 (96.1-99.5)    | 0.79               | 0.57       |
| <b>Cough (&gt;=2 weeks)</b>            | 7.25 (3.68-14.27)                | 0 (0-0)                 | 6.89 (3.55-13.39)               | 0.64                   | 9 (5-16)              | 82 (67-91)              | 17.0 (9.0-29.8)    | 98.0 (95.6-99.1)    | 0.9                | 0.96       |
| <b>Hb (&lt;10 g/dL)</b>                | 1.33 (0.57-3.09)                 | 0 (0-85)                | 1.33 (0.57-3.09)                | 0.57                   | 26 (16-40)            | 78 (47-91)              | 3.1 (1.5-6.3)      | 98.2 (89.9-99.7)    | 0.24               | 0.51       |
| <b>Hb (&lt;8 g/dL)##</b>               | 1.98 (0.25-15.58)                | 0 (0-83)                | 0.69 (0.12-4.11)                | 0.02                   | 2 (1-3)               | 6 (0-80)                | -                  | -                   | 0.51               | 0.29       |
| <b>BMI (&lt;18.5 kg/m<sup>2</sup>)</b> | 5.68 (1.39-23.17)                | 0 (0-69)                | 5.68 (1.39-23.17)               | 0.85                   | 4 (2-6)               | 32 (0-71)               | 1.3 (0.0-93.6)     | 97.5 (95.3-98.7)    | 0.96               | 0.76       |
| <b>Lymphadenopathy#</b>                | -                                | -                       | -                               | -                      | -                     | -                       | -                  | -                   | -                  | -          |
| <b>W4SS with CRP (&gt;=10 mg/L)††#</b> | -                                | -                       | -                               | -                      | -                     | -                       | -                  | -                   | -                  | -          |
| <b>W4SS with CXR (abnormal)</b>        | 3.86 (0.12-126.73)               | -                       | -                               | -                      | 50 (20-80)            | -                       | 25.0 ( 1.3-69.9)   | 100.0 ( 51.0-100.0) | -                  | -          |
| <b>W4SS then CRP (&gt;=5 mg/L)††#</b>  | -                                | -                       | -                               | -                      | -                     | -                       | -                  | -                   | -                  | -          |
| <b>W4SS then Xpert*</b>                | 165.04 (24.50-1111.61)           | 0 (0-6)                 | 165.04 (24.50-1111.61)          | 0.12                   | 1 (0-2)               | 0 (0-29)                | 100.0 (0.0-100.0)  | 98.1 (96.5-99.0)    | -                  | 0.67       |
| <b>Xpert alone*</b>                    | 141.49 (31.79-629.82)            | 0 (0-0)                 | 158.18 (39.84-627.97)           | 0.64                   | 2 (1-4)               | 0 (0-76)                | 73.4 (40.5-91.8)   | 98.5 (97.0-99.3)    | -                  | 0.66       |

†For the meta-regressions, the outcome variable was the diagnostic odds ratio

††Calculated using meta-analysis of proportions. We used a generalized linear mixed model with logit transformation in preference to protocol specified DerSimonian and Laird random effects model for proportions with variance stabilization by applying the Freeman-Tukey double arcsine transformation

†††Pooled using a trivariate generalized linear mixed model that jointly models diagnostic test prevalence and predictive values

#Insufficient data to perform meta-analysis

##Trivariate random-effects model did not converge

\*Estimates for entire algorithm using total Xpert (sputum and/or non-sputum Xpert result)

Definition of abbreviations: BMI = body mass index, CRP = C-reactive protein, CXR = chest X-ray, GLMM = generalized linear mixed model, Hb = haemoglobin, NPV = negative predictive value, PPV = positive predictive value, W4SS = WHO four-symptom screen

**Table S10 - Yield of different screening and diagnostic algorithms when screening a population of 1000 persons**

Table S10A - Yield of different screening and diagnostic algorithms at different prevalences when screening a population of 1000 participants

| Test                        | Total TB | Outcome of screenings§ |    |     |     |    |      |      | Outcome of screening then diagnosis§ |     |    |    |      |      |     |
|-----------------------------|----------|------------------------|----|-----|-----|----|------|------|--------------------------------------|-----|----|----|------|------|-----|
|                             |          | TP+FP‡                 | TP | FP  | TN  | FN | PPV  | NPV  | TP                                   | TN  | FP | FN | PPV  | NPV  | NNS |
| 1% prevalence               |          |                        |    |     |     |    |      |      |                                      |     |    |    |      |      |     |
| W4SS                        | 10       | 582                    | 8  | 574 | 416 | 2  | 1.4  | 99.6 | -                                    | -   | -  | -  | -    | -    | -   |
| CRP (>=10 mg/L)             | 10       | 265                    | 8  | 257 | 733 | 2  | 2.9  | 99.7 | -                                    | -   | -  | -  | -    | -    | -   |
| CRP (>=8 mg/L)              | 10       | 305                    | 8  | 297 | 693 | 2  | 2.7  | 99.7 | -                                    | -   | -  | -  | -    | -    | -   |
| CRP (>=5 mg/L)              | 10       | 405                    | 9  | 396 | 594 | 1  | 2.1  | 99.8 | -                                    | -   | -  | -  | -    | -    | -   |
| CXR (abnormal)              | 10       | 383                    | 7  | 376 | 614 | 3  | 1.9  | 99.5 | -                                    | -   | -  | -  | -    | -    | -   |
| CXR (suggests tuberculosis) | 10       | 224                    | 6  | 218 | 772 | 4  | 2.8  | 99.5 | -                                    | -   | -  | -  | -    | -    | -   |
| Cough (any)                 | 10       | 283                    | 6  | 277 | 713 | 4  | 2    | 99.4 | -                                    | -   | -  | -  | -    | -    | -   |
| Cough (>=2 weeks)           | 10       | 162                    | 4  | 158 | 832 | 6  | 2.3  | 99.3 | -                                    | -   | -  | -  | -    | -    | -   |
| Hb (<10 g/dL)               | 10       | 202                    | 4  | 198 | 792 | 6  | 2.1  | 99.3 | -                                    | -   | -  | -  | -    | -    | -   |
| Hb (<8 g/dL)                | 10       | 41                     | 1  | 40  | 950 | 9  | 2.9  | 99.1 | -                                    | -   | -  | -  | -    | -    | -   |
| BMI (<18.5 kg/m²)           | 10       | 112                    | 3  | 109 | 881 | 7  | 2.6  | 99.2 | -                                    | -   | -  | -  | -    | -    | -   |
| Lymphadenopathy             | 10       | 102                    | 3  | 99  | 891 | 7  | 3    | 99.2 | -                                    | -   | -  | -  | -    | -    | -   |
| W4SS with CRP (>=10 mg/L)¶  | 10       | 692                    | 9  | 683 | 307 | 1  | 1.3  | 99.6 | -                                    | -   | -  | -  | -    | -    | -   |
| W4SS with CXR (abnormal)¶   | 10       | 801                    | 9  | 792 | 198 | 1  | 1.2  | 99.7 | -                                    | -   | -  | -  | -    | -    | -   |
| W4SS then CRP (>=5 mg/L)¶   | 10       | 255                    | 7  | 248 | 742 | 3  | 2.8  | 99.6 | -                                    | -   | -  | -  | -    | -    | -   |
| Xpert alone*†               | 10       | -                      | -  | -   | -   | -  | -    | -    | 7                                    | 980 | 10 | 3  | 40.7 | 99.7 | 143 |
| WHO screen then Xpert*†     | 10       | -                      | -  | -   | -   | -  | -    | -    | 6                                    | 980 | 10 | 4  | 36.9 | 99.6 | 167 |
| 5% prevalence               |          |                        |    |     |     |    |      |      |                                      |     |    |    |      |      |     |
| W4SS                        | 50       | 592                    | 41 | 551 | 399 | 9  | 6.9  | 97.8 | -                                    | -   | -  | -  | -    | -    | -   |
| CRP (>=10 mg/L)             | 50       | 285                    | 38 | 247 | 703 | 12 | 13.5 | 98.4 | -                                    | -   | -  | -  | -    | -    | -   |
| CRP (>=8 mg/L)              | 50       | 325                    | 40 | 285 | 665 | 10 | 12.4 | 98.6 | -                                    | -   | -  | -  | -    | -    | -   |
| CRP (>=5 mg/L)              | 50       | 424                    | 44 | 380 | 570 | 6  | 10.3 | 98.9 | -                                    | -   | -  | -  | -    | -    | -   |
| CXR (abnormal)              | 50       | 397                    | 36 | 361 | 589 | 14 | 9.1  | 97.7 | -                                    | -   | -  | -  | -    | -    | -   |
| CXR (suggests tuberculosis) | 50       | 241                    | 32 | 209 | 741 | 18 | 13.1 | 97.6 | -                                    | -   | -  | -  | -    | -    | -   |
| Cough (any)                 | 50       | 294                    | 28 | 266 | 684 | 22 | 9.5  | 96.9 | -                                    | -   | -  | -  | -    | -    | -   |
| Cough (>=2 weeks)           | 50       | 171                    | 19 | 152 | 798 | 31 | 11.1 | 96.3 | -                                    | -   | -  | -  | -    | -    | -   |
| Hb (<10 g/dL)               | 50       | 212                    | 22 | 190 | 760 | 28 | 10.2 | 96.4 | -                                    | -   | -  | -  | -    | -    | -   |
| Hb (<8 g/dL)                | 50       | 44                     | 6  | 38  | 912 | 44 | 13.6 | 95.4 | -                                    | -   | -  | -  | -    | -    | -   |
| BMI (<18.5 kg/m²)           | 50       | 118                    | 14 | 104 | 846 | 36 | 12.2 | 96   | -                                    | -   | -  | -  | -    | -    | -   |
| Lymphadenopathy             | 50       | 111                    | 16 | 95  | 855 | 34 | 14   | 96.1 | -                                    | -   | -  | -  | -    | -    | -   |
| W4SS with CRP (>=10 mg/L)¶  | 50       | 700                    | 44 | 656 | 294 | 6  | 6.3  | 98   | -                                    | -   | -  | -  | -    | -    | -   |
| W4SS with CXR (abnormal)¶   | 50       | 807                    | 47 | 760 | 190 | 3  | 5.8  | 98.4 | -                                    | -   | -  | -  | -    | -    | -   |
| W4SS then CRP (>=5 mg/L)¶   | 50       | 273                    | 35 | 238 | 712 | 15 | 12.8 | 97.9 | -                                    | -   | -  | -  | -    | -    | -   |
| Xpert alone*†               | 50       | -                      | -  | -   | -   | -  | -    | -    | 34                                   | 940 | 10 | 16 | 78.2 | 98.3 | 29  |
| WHO screen then Xpert*†     | 50       | -                      | -  | -   | -   | -  | -    | -    | 29                                   | 940 | 10 | 21 | 75.3 | 97.8 | 34  |

| Test                        | Total TB | Outcome of screening§ |     |     |     |     |      |      | Outcome of screening then diagnosis§ |     |    |    |      |      |     |
|-----------------------------|----------|-----------------------|-----|-----|-----|-----|------|------|--------------------------------------|-----|----|----|------|------|-----|
|                             |          | TP+FP‡                | TP  | FP  | TN  | FN  | PPV  | NPV  | TP                                   | TN  | FP | FN | PPV  | NPV  | NNS |
| 10% prevalence              |          |                       |     |     |     |     |      |      |                                      |     |    |    |      |      |     |
| W4SS                        | 100      | 604                   | 82  | 522 | 378 | 18  | 13.6 | 95.5 | -                                    | -   | -  | -  | -    | -    | -   |
| CRP (>=10 mg/L)             | 100      | 311                   | 77  | 234 | 666 | 23  | 24.8 | 96.7 | -                                    | -   | -  | -  | -    | -    | -   |
| CRP (>=8 mg/L)              | 100      | 351                   | 81  | 270 | 630 | 19  | 23.1 | 97.1 | -                                    | -   | -  | -  | -    | -    | -   |
| CRP (>=5 mg/L)              | 100      | 447                   | 87  | 360 | 540 | 13  | 19.5 | 97.6 | -                                    | -   | -  | -  | -    | -    | -   |
| CXR (abnormal)              | 100      | 414                   | 72  | 342 | 558 | 28  | 17.4 | 95.2 | -                                    | -   | -  | -  | -    | -    | -   |
| CXR (suggests tuberculosis) | 100      | 261                   | 63  | 198 | 702 | 37  | 24.1 | 95   | -                                    | -   | -  | -  | -    | -    | -   |
| Cough (any)                 | 100      | 308                   | 56  | 252 | 648 | 44  | 18.2 | 93.6 | -                                    | -   | -  | -  | -    | -    | -   |
| Cough (>=2 weeks)           | 100      | 182                   | 38  | 144 | 756 | 62  | 20.9 | 92.4 | -                                    | -   | -  | -  | -    | -    | -   |
| Hb (<10 g/dL)               | 100      | 223                   | 43  | 180 | 720 | 57  | 19.3 | 92.7 | -                                    | -   | -  | -  | -    | -    | -   |
| Hb (<8 g/dL)                | 100      | 48                    | 12  | 36  | 864 | 88  | 25   | 90.8 | -                                    | -   | -  | -  | -    | -    | -   |
| BMI (<18.5 kg/m²)           | 100      | 128                   | 29  | 99  | 801 | 71  | 22.7 | 91.9 | -                                    | -   | -  | -  | -    | -    | -   |
| Lymphadenopathy             | 100      | 121                   | 31  | 90  | 810 | 69  | 25.6 | 92.2 | -                                    | -   | -  | -  | -    | -    | -   |
| W4SS with CRP (>=10 mg/L)¶  | 100      | 709                   | 88  | 621 | 279 | 12  | 12.4 | 95.9 | -                                    | -   | -  | -  | -    | -    | -   |
| W4SS with CXR (abnormal)¶   | 100      | 814                   | 94  | 720 | 180 | 6   | 11.5 | 96.8 | -                                    | -   | -  | -  | -    | -    | -   |
| W4SS then CRP (>=5 mg/L)¶   | 100      | 295                   | 70  | 225 | 675 | 30  | 23.7 | 95.7 | -                                    | -   | -  | -  | -    | -    | -   |
| Xpert alone*†               | 100      | -                     | -   | -   | -   | -   | -    | -    | 68                                   | 891 | 9  | 32 | 88.3 | 96.5 | 15  |
| WHO screen then Xpert*†     | 100      | -                     | -   | -   | -   | -   | -    | -    | 58                                   | 891 | 9  | 42 | 86.6 | 95.5 | 17  |
| 20% prevalence              |          |                       |     |     |     |     |      |      |                                      |     |    |    |      |      |     |
| W4SS                        | 200      | 628                   | 164 | 464 | 336 | 36  | 26.1 | 90.3 | -                                    | -   | -  | -  | -    | -    | -   |
| CRP (>=10 mg/L)             | 200      | 362                   | 154 | 208 | 592 | 46  | 42.5 | 92.8 | -                                    | -   | -  | -  | -    | -    | -   |
| CRP (>=8 mg/L)              | 200      | 402                   | 162 | 240 | 560 | 38  | 40.3 | 93.6 | -                                    | -   | -  | -  | -    | -    | -   |
| CRP (>=5 mg/L)              | 200      | 494                   | 174 | 320 | 480 | 26  | 35.2 | 94.9 | -                                    | -   | -  | -  | -    | -    | -   |
| CXR (abnormal)              | 200      | 448                   | 144 | 304 | 496 | 56  | 32.1 | 89.9 | -                                    | -   | -  | -  | -    | -    | -   |
| CXR (suggests tuberculosis) | 200      | 302                   | 126 | 176 | 624 | 74  | 41.7 | 89.4 | -                                    | -   | -  | -  | -    | -    | -   |
| Cough (any)                 | 200      | 336                   | 112 | 224 | 576 | 88  | 33.3 | 86.7 | -                                    | -   | -  | -  | -    | -    | -   |
| Cough (>=2 weeks)           | 200      | 204                   | 76  | 128 | 672 | 124 | 37.3 | 84.4 | -                                    | -   | -  | -  | -    | -    | -   |
| Hb (<10 g/dL)               | 200      | 246                   | 86  | 160 | 640 | 114 | 35   | 84.9 | -                                    | -   | -  | -  | -    | -    | -   |
| Hb (<8 g/dL)                | 200      | 56                    | 24  | 32  | 768 | 176 | 42.9 | 81.4 | -                                    | -   | -  | -  | -    | -    | -   |
| BMI (<18.5 kg/m²)           | 200      | 146                   | 58  | 88  | 712 | 142 | 39.7 | 83.4 | -                                    | -   | -  | -  | -    | -    | -   |
| Lymphadenopathy             | 200      | 142                   | 62  | 80  | 720 | 138 | 43.7 | 83.9 | -                                    | -   | -  | -  | -    | -    | -   |
| W4SS with CRP (>=10 mg/L)¶  | 200      | 728                   | 176 | 552 | 248 | 24  | 24.2 | 91.2 | -                                    | -   | -  | -  | -    | -    | -   |
| W4SS with CXR (abnormal)¶   | 200      | 828                   | 188 | 640 | 160 | 12  | 22.7 | 93   | -                                    | -   | -  | -  | -    | -    | -   |
| W4SS then CRP (>=5 mg/L)¶   | 200      | 340                   | 140 | 200 | 600 | 60  | 41.2 | 90.9 | -                                    | -   | -  | -  | -    | -    | -   |
| Xpert alone*†               | 200      | -                     | -   | -   | -   | -   | -    | -    | 136                                  | 792 | 8  | 64 | 94.4 | 92.5 | 7   |
| WHO screen then Xpert*†     | 200      | -                     | -   | -   | -   | -   | -    | -    | 116                                  | 792 | 8  | 84 | 93.5 | 90.4 | 9   |

§Estimated using the pooled point estimates for sensitivity and specificity for different tests/strategies

‡TP+FP is the number of participants who screen positive (i.e. the number who need subsequent Xpert testing)

|      |          | Outcome of screening§ |    |    |    |    |     |     | Outcome of screening then diagnosis§ |    |    |    |     |     |     |
|------|----------|-----------------------|----|----|----|----|-----|-----|--------------------------------------|----|----|----|-----|-----|-----|
| Test | Total TB | TP+FP†                | TP | FP | TN | FN | PPV | NPV | TP                                   | TN | FP | FN | PPV | NPV | NNS |

¶For parallel strategies, two screening tests are offered at the same time. For sequential strategies, a second screening test is offered only if the first screening test is positive

\*Accuracy measures for entire algorithm using total Xpert (sputum and/or non-sputum Xpert result)

†The test accuracy of Xpert in those who were W4SS positive was: 12 studies; 4558 participants; sensitivity 0.74 (0.65-0.81), specificity 0.98 (0.97-0.99).

Definition of abbreviations: BMI = body mass index, CRP = C-reactive protein, CXR = chest X-ray, FN= false negative, FP = false positive, Hb = haemoglobin, NNS = number needed to screen, NPV = negative predictive value, PPV = positive predictive value, TB = tuberculosis, TN = true negative, TP = true positive, W4SS = WHO four-symptom screen



Table S10B - Yield of different screening and diagnostic algorithms at different prevalences when screening a population of 1000 outpatients (on ART)

| Test                        | Total TB | Outcome of screening§ |    |     |     |    |      |      | Outcome of screening then diagnosis§ |     |    |    |      |      |     |
|-----------------------------|----------|-----------------------|----|-----|-----|----|------|------|--------------------------------------|-----|----|----|------|------|-----|
|                             |          | TP+FP‡                | TP | FP  | TN  | FN | PPV  | NPV  | TP                                   | TN  | FP | FN | PPV  | NPV  | NNS |
| 1% prevalence               |          |                       |    |     |     |    |      |      |                                      |     |    |    |      |      |     |
| W4SS                        | 10       | 292                   | 5  | 287 | 703 | 5  | 1.8  | 99.3 | -                                    | -   | -  | -  | -    | -    | -   |
| CRP (>=10 mg/L)             | 10       | 101                   | 2  | 99  | 891 | 8  | 2    | 99.1 | -                                    | -   | -  | -  | -    | -    | -   |
| CRP (>=8 mg/L)              | 10       | 113                   | 4  | 109 | 881 | 6  | 3.5  | 99.3 | -                                    | -   | -  | -  | -    | -    | -   |
| CRP (>=5 mg/L)              | 10       | 202                   | 4  | 198 | 792 | 6  | 2    | 99.2 | -                                    | -   | -  | -  | -    | -    | -   |
| CXR (abnormal)              | 10       | 373                   | 7  | 366 | 624 | 3  | 2    | 99.6 | -                                    | -   | -  | -  | -    | -    | -   |
| CXR (suggests tuberculosis) | 10       | 225                   | 7  | 218 | 772 | 3  | 3.1  | 99.6 | -                                    | -   | -  | -  | -    | -    | -   |
| Cough (any)                 | 10       | 172                   | 4  | 168 | 822 | 6  | 2.3  | 99.3 | -                                    | -   | -  | -  | -    | -    | -   |
| Cough (>=2 weeks)           | 10       | 71                    | 2  | 69  | 921 | 8  | 2.7  | 99.1 | -                                    | -   | -  | -  | -    | -    | -   |
| Hb (<10 g/dL)               | 10       | 184                   | 6  | 178 | 812 | 4  | 3    | 99.4 | -                                    | -   | -  | -  | -    | -    | -   |
| Hb (<8 g/dL)                | 10       | 61                    | 2  | 59  | 931 | 8  | 2.9  | 99.1 | -                                    | -   | -  | -  | -    | -    | -   |
| BMI (<18.5 kg/m²)           | 10       | 71                    | 2  | 69  | 921 | 8  | 2.3  | 99.1 | -                                    | -   | -  | -  | -    | -    | -   |
| Lymphadenopathy             | 10       | 71                    | 2  | 69  | 921 | 8  | 3.1  | 99.2 | -                                    | -   | -  | -  | -    | -    | -   |
| W4SS with CRP (>=10 mg/L)¶  | 10       | 200                   | 2  | 198 | 792 | 8  | 1    | 99   | -                                    | -   | -  | -  | -    | -    | -   |
| W4SS with CXR (abnormal)¶   | 10       | 672                   | 9  | 663 | 327 | 1  | 1.3  | 99.7 | -                                    | -   | -  | -  | -    | -    | -   |
| W4SS then CRP (>=5 mg/L)¶   | 10       | 41                    | 1  | 40  | 950 | 9  | 2    | 99   | -                                    | -   | -  | -  | -    | -    | -   |
| Xpert alone*†               | 10       | -                     | -  | -   | -   | -  | -    | -    | 5                                    | 980 | 10 | 5  | 34.9 | 99.5 | 200 |
| WHO screen then Xpert*†     | 10       | -                     | -  | -   | -   | -  | -    | -    | 4                                    | 990 | 0  | 6  | 100  | 99.4 | 250 |
| 5% prevalence               |          |                       |    |     |     |    |      |      |                                      |     |    |    |      |      |     |
| W4SS                        | 50       | 302                   | 26 | 276 | 674 | 24 | 8.8  | 96.6 | -                                    | -   | -  | -  | -    | -    | -   |
| CRP (>=10 mg/L)             | 50       | 105                   | 10 | 95  | 855 | 40 | 9.5  | 95.5 | -                                    | -   | -  | -  | -    | -    | -   |
| CRP (>=8 mg/L)              | 50       | 124                   | 20 | 104 | 846 | 30 | 16.1 | 96.6 | -                                    | -   | -  | -  | -    | -    | -   |
| CRP (>=5 mg/L)              | 50       | 210                   | 20 | 190 | 760 | 30 | 9.5  | 96.2 | -                                    | -   | -  | -  | -    | -    | -   |
| CXR (abnormal)              | 50       | 388                   | 36 | 352 | 598 | 14 | 9.4  | 97.8 | -                                    | -   | -  | -  | -    | -    | -   |
| CXR (suggests tuberculosis) | 50       | 244                   | 35 | 209 | 741 | 15 | 14.3 | 98   | -                                    | -   | -  | -  | -    | -    | -   |
| Cough (any)                 | 50       | 181                   | 20 | 161 | 789 | 30 | 11   | 96.3 | -                                    | -   | -  | -  | -    | -    | -   |
| Cough (>=2 weeks)           | 50       | 76                    | 10 | 66  | 884 | 40 | 12.5 | 95.6 | -                                    | -   | -  | -  | -    | -    | -   |
| Hb (<10 g/dL)               | 50       | 199                   | 28 | 171 | 779 | 22 | 13.9 | 97.2 | -                                    | -   | -  | -  | -    | -    | -   |
| Hb (<8 g/dL)                | 50       | 66                    | 9  | 57  | 893 | 41 | 13.6 | 95.6 | -                                    | -   | -  | -  | -    | -    | -   |
| BMI (<18.5 kg/m²)           | 50       | 74                    | 8  | 66  | 884 | 42 | 10.7 | 95.5 | -                                    | -   | -  | -  | -    | -    | -   |
| Lymphadenopathy             | 50       | 77                    | 11 | 66  | 884 | 39 | 14.2 | 95.8 | -                                    | -   | -  | -  | -    | -    | -   |
| W4SS with CRP (>=10 mg/L)¶  | 50       | 200                   | 10 | 190 | 760 | 40 | 5    | 95   | -                                    | -   | -  | -  | -    | -    | -   |
| W4SS with CXR (abnormal)¶   | 50       | 680                   | 44 | 636 | 314 | 6  | 6.5  | 98.3 | -                                    | -   | -  | -  | -    | -    | -   |
| W4SS then CRP (>=5 mg/L)¶   | 50       | 42                    | 4  | 38  | 912 | 46 | 9.5  | 95.2 | -                                    | -   | -  | -  | -    | -    | -   |
| Xpert alone*†               | 50       | -                     | -  | -   | -   | -  | -    | -    | 26                                   | 940 | 10 | 24 | 73.6 | 97.6 | 38  |
| WHO screen then Xpert*†     | 50       | -                     | -  | -   | -   | -  | -    | -    | 18                                   | 950 | 0  | 32 | 100  | 96.8 | 56  |
| 10% prevalence              |          |                       |    |     |     |    |      |      |                                      |     |    |    |      |      |     |

| Test                        | Total TB | Outcome of screening§ |     |     |     |     |      |      | Outcome of screening then diagnosis§ |     |    |     |      |      |     |
|-----------------------------|----------|-----------------------|-----|-----|-----|-----|------|------|--------------------------------------|-----|----|-----|------|------|-----|
|                             |          | TP+FP‡                | TP  | FP  | TN  | FN  | PPV  | NPV  | TP                                   | TN  | FP | FN  | PPV  | NPV  | NNS |
| W4SS                        | 100      | 314                   | 53  | 261 | 639 | 47  | 16.9 | 93.1 | -                                    | -   | -  | -   | -    | -    | -   |
| CRP (>=10 mg/L)             | 100      | 110                   | 20  | 90  | 810 | 80  | 18.2 | 91   | -                                    | -   | -  | -   | -    | -    | -   |
| CRP (>=8 mg/L)              | 100      | 139                   | 40  | 99  | 801 | 60  | 28.8 | 93   | -                                    | -   | -  | -   | -    | -    | -   |
| CRP (>=5 mg/L)              | 100      | 220                   | 40  | 180 | 720 | 60  | 18.2 | 92.3 | -                                    | -   | -  | -   | -    | -    | -   |
| CXR (abnormal)              | 100      | 406                   | 73  | 333 | 567 | 27  | 18   | 95.5 | -                                    | -   | -  | -   | -    | -    | -   |
| CXR (suggests tuberculosis) | 100      | 268                   | 70  | 198 | 702 | 30  | 26.1 | 95.9 | -                                    | -   | -  | -   | -    | -    | -   |
| Cough (any)                 | 100      | 193                   | 40  | 153 | 747 | 60  | 20.7 | 92.6 | -                                    | -   | -  | -   | -    | -    | -   |
| Cough (>=2 weeks)           | 100      | 82                    | 19  | 63  | 837 | 81  | 23.2 | 91.2 | -                                    | -   | -  | -   | -    | -    | -   |
| Hb (<10 g/dL)               | 100      | 217                   | 55  | 162 | 738 | 45  | 25.3 | 94.3 | -                                    | -   | -  | -   | -    | -    | -   |
| Hb (<8 g/dL)                | 100      | 72                    | 18  | 54  | 846 | 82  | 25   | 91.2 | -                                    | -   | -  | -   | -    | -    | -   |
| BMI (<18.5 kg/m²)           | 100      | 79                    | 16  | 63  | 837 | 84  | 20.3 | 90.9 | -                                    | -   | -  | -   | -    | -    | -   |
| Lymphadenopathy             | 100      | 85                    | 22  | 63  | 837 | 78  | 25.9 | 91.5 | -                                    | -   | -  | -   | -    | -    | -   |
| W4SS with CRP (>=10 mg/L)¶  | 100      | 200                   | 20  | 180 | 720 | 80  | 10   | 90   | -                                    | -   | -  | -   | -    | -    | -   |
| W4SS with CXR (abnormal)¶   | 100      | 692                   | 89  | 603 | 297 | 11  | 12.9 | 96.4 | -                                    | -   | -  | -   | -    | -    | -   |
| W4SS then CRP (>=5 mg/L)¶   | 100      | 44                    | 8   | 36  | 864 | 92  | 18.2 | 90.4 | -                                    | -   | -  | -   | -    | -    | -   |
| Xpert alone*†               | 100      | -                     | -   | -   | -   | -   | -    | -    | 53                                   | 891 | 9  | 47  | 85.5 | 95   | 19  |
| WHO screen then Xpert**†    | 100      | -                     | -   | -   | -   | -   | -    | -    | 37                                   | 900 | 0  | 63  | 100  | 93.5 | 27  |
| 20% prevalence              |          |                       |     |     |     |     |      |      |                                      |     |    |     |      |      |     |
| W4SS                        | 200      | 338                   | 106 | 232 | 568 | 94  | 31.4 | 85.8 | -                                    | -   | -  | -   | -    | -    | -   |
| CRP (>=10 mg/L)             | 200      | 120                   | 40  | 80  | 720 | 160 | 33.3 | 81.8 | -                                    | -   | -  | -   | -    | -    | -   |
| CRP (>=8 mg/L)              | 200      | 168                   | 80  | 88  | 712 | 120 | 47.6 | 85.6 | -                                    | -   | -  | -   | -    | -    | -   |
| CRP (>=5 mg/L)              | 200      | 240                   | 80  | 160 | 640 | 120 | 33.3 | 84.2 | -                                    | -   | -  | -   | -    | -    | -   |
| CXR (abnormal)              | 200      | 442                   | 146 | 296 | 504 | 54  | 33   | 90.3 | -                                    | -   | -  | -   | -    | -    | -   |
| CXR (suggests tuberculosis) | 200      | 316                   | 140 | 176 | 624 | 60  | 44.3 | 91.2 | -                                    | -   | -  | -   | -    | -    | -   |
| Cough (any)                 | 200      | 216                   | 80  | 136 | 664 | 120 | 37   | 84.7 | -                                    | -   | -  | -   | -    | -    | -   |
| Cough (>=2 weeks)           | 200      | 94                    | 38  | 56  | 744 | 162 | 40.4 | 82.1 | -                                    | -   | -  | -   | -    | -    | -   |
| Hb (<10 g/dL)               | 200      | 254                   | 110 | 144 | 656 | 90  | 43.3 | 87.9 | -                                    | -   | -  | -   | -    | -    | -   |
| Hb (<8 g/dL)                | 200      | 84                    | 36  | 48  | 752 | 164 | 42.9 | 82.1 | -                                    | -   | -  | -   | -    | -    | -   |
| BMI (<18.5 kg/m²)           | 200      | 88                    | 32  | 56  | 744 | 168 | 36.4 | 81.6 | -                                    | -   | -  | -   | -    | -    | -   |
| Lymphadenopathy             | 200      | 100                   | 44  | 56  | 744 | 156 | 44   | 82.7 | -                                    | -   | -  | -   | -    | -    | -   |
| W4SS with CRP (>=10 mg/L)¶  | 200      | 200                   | 40  | 160 | 640 | 160 | 20   | 80   | -                                    | -   | -  | -   | -    | -    | -   |
| W4SS with CXR (abnormal)¶   | 200      | 714                   | 178 | 536 | 264 | 22  | 24.9 | 92.3 | -                                    | -   | -  | -   | -    | -    | -   |
| W4SS then CRP (>=5 mg/L)¶   | 200      | 48                    | 16  | 32  | 768 | 184 | 33.3 | 80.7 | -                                    | -   | -  | -   | -    | -    | -   |
| Xpert alone*†               | 200      | -                     | -   | -   | -   | -   | -    | -    | 106                                  | 792 | 8  | 94  | 93   | 89.4 | 9   |
| WHO screen then Xpert**†    | 200      | -                     | -   | -   | -   | -   | -    | -    | 74                                   | 800 | 0  | 126 | 100  | 86.4 | 14  |

§Estimated using the pooled point estimates for sensitivity and specificity for different tests/strategies

‡TP+FP is the number of participants who screen positive (i.e. the number who need subsequent Xpert testing)

¶For parallel strategies, two screening tests are offered at the same time. For sequential strategies, a second screening test is offered only if the first screening test is positive

\*Accuracy measures for entire algorithm using total Xpert (sputum and/or non-sputum Xpert result)

|      |          | Outcome of screening§ |    |    |    |    |     |     | Outcome of screening then diagnosis§ |    |    |    |     |     |     |
|------|----------|-----------------------|----|----|----|----|-----|-----|--------------------------------------|----|----|----|-----|-----|-----|
| Test | Total TB | TP+FP†                | TP | FP | TN | FN | PPV | NPV | TP                                   | TN | FP | FN | PPV | NPV | NNS |

†The test accuracy of Xpert in those who were W4SS positive was: 4 studies; 564 participants; sensitivity 0.91 (0.42-0.99), specificity 0.98 (0.91-1).

Definition of abbreviations: BMI = body mass index, CRP = C-reactive protein, CXR = chest X-ray, FN= false negative, FP = false positive, Hb = haemoglobin, NNS = number needed to screen, NPV = negative predictive value, PPV = positive predictive value, TB = tuberculosis, TN = true negative, TP = true positive, W4SS = WHO four-symptom screen

Table S10C - Yield of different screening and diagnostic algorithms at different prevalences when screening a population of 1000 outpatients (not on ART)

| Test                        | Total TB | Outcome of screening§ |    |     |     |    |      |      | Outcome of screening then diagnosis§ |     |    |    |      |      |     |
|-----------------------------|----------|-----------------------|----|-----|-----|----|------|------|--------------------------------------|-----|----|----|------|------|-----|
|                             |          | TP+FP‡                | TP | FP  | TN  | FN | PPV  | NPV  | TP                                   | TN  | FP | FN | PPV  | NPV  | NNS |
| 1% prevalence               |          |                       |    |     |     |    |      |      |                                      |     |    |    |      |      |     |
| W4SS                        | 10       | 632                   | 8  | 624 | 366 | 2  | 1.3  | 99.6 | -                                    | -   | -  | -  | -    | -    | -   |
| CRP (>=10 mg/L)             | 10       | 335                   | 8  | 327 | 663 | 2  | 2.5  | 99.7 | -                                    | -   | -  | -  | -    | -    | -   |
| CRP (>=8 mg/L)              | 10       | 374                   | 8  | 366 | 624 | 2  | 2.3  | 99.8 | -                                    | -   | -  | -  | -    | -    | -   |
| CRP (>=5 mg/L)              | 10       | 474                   | 9  | 465 | 525 | 1  | 1.9  | 99.8 | -                                    | -   | -  | -  | -    | -    | -   |
| CXR (abnormal)              | 10       | 383                   | 7  | 376 | 614 | 3  | 1.9  | 99.5 | -                                    | -   | -  | -  | -    | -    | -   |
| CXR (suggests tuberculosis) | 10       | 214                   | 6  | 208 | 782 | 4  | 2.9  | 99.5 | -                                    | -   | -  | -  | -    | -    | -   |
| Cough (any)                 | 10       | 303                   | 6  | 297 | 693 | 4  | 1.9  | 99.4 | -                                    | -   | -  | -  | -    | -    | -   |
| Cough (>=2 weeks)           | 10       | 182                   | 4  | 178 | 812 | 6  | 2.4  | 99.3 | -                                    | -   | -  | -  | -    | -    | -   |
| Hb (<10 g/dL)               | 10       | 222                   | 4  | 218 | 772 | 6  | 2    | 99.3 | -                                    | -   | -  | -  | -    | -    | -   |
| Hb (<8 g/dL)                | 10       | 41                    | 1  | 40  | 950 | 9  | 2.7  | 99.1 | -                                    | -   | -  | -  | -    | -    | -   |
| BMI (<18.5 kg/m²)           | 10       | 132                   | 3  | 129 | 861 | 7  | 2.4  | 99.2 | -                                    | -   | -  | -  | -    | -    | -   |
| Lymphadenopathy             | 10       | 92                    | 3  | 89  | 901 | 7  | 3.3  | 99.2 | -                                    | -   | -  | -  | -    | -    | -   |
| W4SS with CRP (>=10 mg/L)¶  | 10       | 801                   | 9  | 792 | 198 | 1  | 1.2  | 99.7 | -                                    | -   | -  | -  | -    | -    | -   |
| W4SS with CXR (abnormal)¶   | 10       | 822                   | 10 | 812 | 178 | 0  | 1.2  | 99.7 | -                                    | -   | -  | -  | -    | -    | -   |
| W4SS then CRP (>=5 mg/L)¶   | 10       | 364                   | 8  | 356 | 634 | 2  | 2.3  | 99.7 | -                                    | -   | -  | -  | -    | -    | -   |
| Xpert alone*†               | 10       | -                     | -  | -   | -   | -  | -    | -    | 7                                    | 980 | 10 | 3  | 42.8 | 99.7 | 143 |
| WHO screen then Xpert*†     | 10       | -                     | -  | -   | -   | -  | -    | -    | 6                                    | 980 | 10 | 4  | 39.3 | 99.6 | 167 |
| 5% prevalence               |          |                       |    |     |     |    |      |      |                                      |     |    |    |      |      |     |
| W4SS                        | 50       | 640                   | 42 | 598 | 352 | 8  | 6.6  | 97.9 | -                                    | -   | -  | -  | -    | -    | -   |
| CRP (>=10 mg/L)             | 50       | 355                   | 42 | 313 | 637 | 8  | 11.7 | 98.7 | -                                    | -   | -  | -  | -    | -    | -   |
| CRP (>=8 mg/L)              | 50       | 394                   | 42 | 352 | 598 | 8  | 10.8 | 98.8 | -                                    | -   | -  | -  | -    | -    | -   |
| CRP (>=5 mg/L)              | 50       | 490                   | 44 | 446 | 504 | 6  | 9.1  | 98.9 | -                                    | -   | -  | -  | -    | -    | -   |
| CXR (abnormal)              | 50       | 397                   | 36 | 361 | 589 | 14 | 9    | 97.6 | -                                    | -   | -  | -  | -    | -    | -   |
| CXR (suggests tuberculosis) | 50       | 230                   | 31 | 199 | 751 | 19 | 13.4 | 97.5 | -                                    | -   | -  | -  | -    | -    | -   |
| Cough (any)                 | 50       | 314                   | 29 | 285 | 665 | 21 | 9.2  | 96.9 | -                                    | -   | -  | -  | -    | -    | -   |
| Cough (>=2 weeks)           | 50       | 193                   | 22 | 171 | 779 | 28 | 11.2 | 96.5 | -                                    | -   | -  | -  | -    | -    | -   |
| Hb (<10 g/dL)               | 50       | 231                   | 22 | 209 | 741 | 28 | 9.5  | 96.4 | -                                    | -   | -  | -  | -    | -    | -   |
| Hb (<8 g/dL)                | 50       | 44                    | 6  | 38  | 912 | 44 | 12.6 | 95.3 | -                                    | -   | -  | -  | -    | -    | -   |
| BMI (<18.5 kg/m²)           | 50       | 140                   | 16 | 124 | 826 | 34 | 11.2 | 96   | -                                    | -   | -  | -  | -    | -    | -   |
| Lymphadenopathy             | 50       | 100                   | 15 | 85  | 865 | 35 | 14.9 | 96.1 | -                                    | -   | -  | -  | -    | -    | -   |
| W4SS with CRP (>=10 mg/L)¶  | 50       | 807                   | 47 | 760 | 190 | 3  | 5.8  | 98.4 | -                                    | -   | -  | -  | -    | -    | -   |
| W4SS with CXR (abnormal)¶   | 50       | 827                   | 48 | 779 | 171 | 2  | 5.7  | 98.6 | -                                    | -   | -  | -  | -    | -    | -   |
| W4SS then CRP (>=5 mg/L)¶   | 50       | 384                   | 42 | 342 | 608 | 8  | 10.9 | 98.7 | -                                    | -   | -  | -  | -    | -    | -   |
| Xpert alone*†               | 50       | -                     | -  | -   | -   | -  | -    | -    | 37                                   | 940 | 10 | 13 | 79.6 | 98.6 | 27  |
| WHO screen then Xpert*†     | 50       | -                     | -  | -   | -   | -  | -    | -    | 32                                   | 940 | 10 | 18 | 77.1 | 98.1 | 31  |
| 10% prevalence              |          |                       |    |     |     |    |      |      |                                      |     |    |    |      |      |     |

| Test                        | Total TB | Outcome of screening§ |     |     |     |     |      |      | Outcome of screening then diagnosis§ |     |    |    |      |      |     |
|-----------------------------|----------|-----------------------|-----|-----|-----|-----|------|------|--------------------------------------|-----|----|----|------|------|-----|
|                             |          | TP+FP‡                | TP  | FP  | TN  | FN  | PPV  | NPV  | TP                                   | TN  | FP | FN | PPV  | NPV  | NNS |
| W4SS                        | 100      | 652                   | 85  | 567 | 333 | 15  | 13   | 95.7 | -                                    | -   | -  | -  | -    | -    | -   |
| CRP (>=10 mg/L)             | 100      | 380                   | 83  | 297 | 603 | 17  | 21.8 | 97.3 | -                                    | -   | -  | -  | -    | -    | -   |
| CRP (>=8 mg/L)              | 100      | 418                   | 85  | 333 | 567 | 15  | 20.3 | 97.4 | -                                    | -   | -  | -  | -    | -    | -   |
| CRP (>=5 mg/L)              | 100      | 512                   | 89  | 423 | 477 | 11  | 17.4 | 97.7 | -                                    | -   | -  | -  | -    | -    | -   |
| CXR (abnormal)              | 100      | 413                   | 71  | 342 | 558 | 29  | 17.2 | 95.1 | -                                    | -   | -  | -  | -    | -    | -   |
| CXR (suggests tuberculosis) | 100      | 251                   | 62  | 189 | 711 | 38  | 24.7 | 94.9 | -                                    | -   | -  | -  | -    | -    | -   |
| Cough (any)                 | 100      | 328                   | 58  | 270 | 630 | 42  | 17.7 | 93.8 | -                                    | -   | -  | -  | -    | -    | -   |
| Cough (>=2 weeks)           | 100      | 205                   | 43  | 162 | 738 | 57  | 21   | 92.8 | -                                    | -   | -  | -  | -    | -    | -   |
| Hb (<10 g/dL)               | 100      | 242                   | 44  | 198 | 702 | 56  | 18.2 | 92.6 | -                                    | -   | -  | -  | -    | -    | -   |
| Hb (<8 g/dL)                | 100      | 47                    | 11  | 36  | 864 | 89  | 23.4 | 90.7 | -                                    | -   | -  | -  | -    | -    | -   |
| BMI (<18.5 kg/m²)           | 100      | 148                   | 31  | 117 | 783 | 69  | 20.9 | 91.9 | -                                    | -   | -  | -  | -    | -    | -   |
| Lymphadenopathy             | 100      | 111                   | 30  | 81  | 819 | 70  | 27   | 92.1 | -                                    | -   | -  | -  | -    | -    | -   |
| W4SS with CRP (>=10 mg/L)¶  | 100      | 814                   | 94  | 720 | 180 | 6   | 11.5 | 96.8 | -                                    | -   | -  | -  | -    | -    | -   |
| W4SS with CXR (abnormal)¶   | 100      | 833                   | 95  | 738 | 162 | 5   | 11.4 | 97   | -                                    | -   | -  | -  | -    | -    | -   |
| W4SS then CRP (>=5 mg/L)¶   | 100      | 408                   | 84  | 324 | 576 | 16  | 20.6 | 97.3 | -                                    | -   | -  | -  | -    | -    | -   |
| Xpert alone*†               | 100      | -                     | -   | -   | -   | -   | -    | -    | 74                                   | 891 | 9  | 26 | 89.2 | 97.2 | 14  |
| WHO screen then Xpert**†    | 100      | -                     | -   | -   | -   | -   | -    | -    | 64                                   | 891 | 9  | 36 | 87.7 | 96.1 | 16  |
| 20% prevalence              |          |                       |     |     |     |     |      |      |                                      |     |    |    |      |      |     |
| W4SS                        | 200      | 674                   | 170 | 504 | 296 | 30  | 25.2 | 90.8 | -                                    | -   | -  | -  | -    | -    | -   |
| CRP (>=10 mg/L)             | 200      | 430                   | 166 | 264 | 536 | 34  | 38.6 | 94   | -                                    | -   | -  | -  | -    | -    | -   |
| CRP (>=8 mg/L)              | 200      | 466                   | 170 | 296 | 504 | 30  | 36.5 | 94.4 | -                                    | -   | -  | -  | -    | -    | -   |
| CRP (>=5 mg/L)              | 200      | 554                   | 178 | 376 | 424 | 22  | 32.1 | 95.1 | -                                    | -   | -  | -  | -    | -    | -   |
| CXR (abnormal)              | 200      | 446                   | 142 | 304 | 496 | 58  | 31.8 | 89.5 | -                                    | -   | -  | -  | -    | -    | -   |
| CXR (suggests tuberculosis) | 200      | 292                   | 124 | 168 | 632 | 76  | 42.5 | 89.3 | -                                    | -   | -  | -  | -    | -    | -   |
| Cough (any)                 | 200      | 356                   | 116 | 240 | 560 | 84  | 32.6 | 87   | -                                    | -   | -  | -  | -    | -    | -   |
| Cough (>=2 weeks)           | 200      | 230                   | 86  | 144 | 656 | 114 | 37.4 | 85.2 | -                                    | -   | -  | -  | -    | -    | -   |
| Hb (<10 g/dL)               | 200      | 264                   | 88  | 176 | 624 | 112 | 33.3 | 84.8 | -                                    | -   | -  | -  | -    | -    | -   |
| Hb (<8 g/dL)                | 200      | 54                    | 22  | 32  | 768 | 178 | 40.7 | 81.2 | -                                    | -   | -  | -  | -    | -    | -   |
| BMI (<18.5 kg/m²)           | 200      | 166                   | 62  | 104 | 696 | 138 | 37.3 | 83.5 | -                                    | -   | -  | -  | -    | -    | -   |
| Lymphadenopathy             | 200      | 132                   | 60  | 72  | 728 | 140 | 45.5 | 83.9 | -                                    | -   | -  | -  | -    | -    | -   |
| W4SS with CRP (>=10 mg/L)¶  | 200      | 828                   | 188 | 640 | 160 | 12  | 22.7 | 93   | -                                    | -   | -  | -  | -    | -    | -   |
| W4SS with CXR (abnormal)¶   | 200      | 846                   | 190 | 656 | 144 | 10  | 22.5 | 93.5 | -                                    | -   | -  | -  | -    | -    | -   |
| W4SS then CRP (>=5 mg/L)¶   | 200      | 456                   | 168 | 288 | 512 | 32  | 36.8 | 94.1 | -                                    | -   | -  | -  | -    | -    | -   |
| Xpert alone*†               | 200      | -                     | -   | -   | -   | -   | -    | -    | 148                                  | 792 | 8  | 52 | 94.9 | 93.8 | 7   |
| WHO screen then Xpert**†    | 200      | -                     | -   | -   | -   | -   | -    | -    | 128                                  | 792 | 8  | 72 | 94.1 | 91.7 | 8   |

§Estimated using the pooled point estimates for sensitivity and specificity for different tests/strategies

‡TP+FP is the number of participants who screen positive (i.e. the number who need subsequent Xpert testing)

¶For parallel strategies, two screening tests are offered at the same time. For sequential strategies, a second screening test is offered only if the first screening test is positive

\*Accuracy measures for entire algorithm using total Xpert (sputum and/or non-sputum Xpert result)

|      |          | Outcome of screening§ |    |    |    |    |     |     | Outcome of screening then diagnosis§ |    |    |    |     |     |     |
|------|----------|-----------------------|----|----|----|----|-----|-----|--------------------------------------|----|----|----|-----|-----|-----|
| Test | Total TB | TP+FP†                | TP | FP | TN | FN | PPV | NPV | TP                                   | TN | FP | FN | PPV | NPV | NNS |

†The test accuracy of Xpert in those who were W4SS positive was: 10 studies; 3909 participants; sensitivity 0.76 (0.67-0.83), specificity 0.98 (0.97-0.99).

Definition of abbreviations: BMI = body mass index, CRP = C-reactive protein, CXR = chest X-ray, FN= false negative, FP = false positive, Hb = haemoglobin, NNS = number needed to screen, NPV = negative predictive value, PPV = positive predictive value, TB = tuberculosis, TN = true negative, TP = true positive, W4SS = WHO four-symptom screen

Table S10D - Yield of different screening and diagnostic algorithms at different prevalences when screening a population of 1000 participants with a CD4 cell count  $\leq 200$  cells/ $\mu$ L

| Test                               | Total TB | Outcome of screening§ |    |     |     |    |      |      | Outcome of screening then diagnosis§ |     |    |    |      |      |     |
|------------------------------------|----------|-----------------------|----|-----|-----|----|------|------|--------------------------------------|-----|----|----|------|------|-----|
|                                    |          | TP+FP‡                | TP | FP  | TN  | FN | PPV  | NPV  | TP                                   | TN  | FP | FN | PPV  | NPV  | NNS |
| 1% prevalence                      |          |                       |    |     |     |    |      |      |                                      |     |    |    |      |      |     |
| W4SS                               | 10       | 680                   | 44 | 636 | 314 | 6  | 6.4  | 98   | -                                    | -   | -  | -  | -    | -    | -   |
| CRP ( $\geq 10$ mg/L)              | 10       | 405                   | 44 | 361 | 589 | 6  | 10.9 | 99   | -                                    | -   | -  | -  | -    | -    | -   |
| CRP ( $\geq 8$ mg/L)               | 10       | 444                   | 45 | 399 | 551 | 5  | 10.1 | 99.1 | -                                    | -   | -  | -  | -    | -    | -   |
| CRP ( $\geq 5$ mg/L)               | 10       | 540                   | 46 | 494 | 456 | 4  | 8.5  | 99.1 | -                                    | -   | -  | -  | -    | -    | -   |
| CXR (abnormal)                     | 10       | 435                   | 36 | 399 | 551 | 14 | 8.4  | 97.6 | -                                    | -   | -  | -  | -    | -    | -   |
| CXR (suggests tuberculosis)        | 10       | 279                   | 32 | 247 | 703 | 18 | 11.5 | 97.5 | -                                    | -   | -  | -  | -    | -    | -   |
| Cough (any)                        | 10       | 353                   | 30 | 323 | 627 | 20 | 8.4  | 96.8 | -                                    | -   | -  | -  | -    | -    | -   |
| Cough ( $\geq 2$ weeks)            | 10       | 230                   | 21 | 209 | 741 | 29 | 9.1  | 96.2 | -                                    | -   | -  | -  | -    | -    | -   |
| Hb ( $< 10$ g/dL)                  | 10       | 274                   | 27 | 247 | 703 | 23 | 9.9  | 96.8 | -                                    | -   | -  | -  | -    | -    | -   |
| Hb ( $< 8$ g/dL)                   | 10       | 54                    | 7  | 47  | 903 | 43 | 12.8 | 95.5 | -                                    | -   | -  | -  | -    | -    | -   |
| BMI ( $< 18.5$ kg/m <sup>2</sup> ) | 10       | 179                   | 18 | 161 | 789 | 32 | 9.8  | 96   | -                                    | -   | -  | -  | -    | -    | -   |
| Lymphadenopathy                    | 10       | 120                   | 16 | 104 | 846 | 34 | 13.6 | 96.2 | -                                    | -   | -  | -  | -    | -    | -   |
| W4SS with CRP ( $\geq 10$ mg/L)¶   | 10       | 778                   | 46 | 732 | 218 | 4  | 6    | 98.4 | -                                    | -   | -  | -  | -    | -    | -   |
| W4SS with CXR (abnormal)¶          | 10       | 865                   | 48 | 817 | 133 | 2  | 5.5  | 98.5 | -                                    | -   | -  | -  | -    | -    | -   |
| W4SS then CRP ( $\geq 5$ mg/L)¶    | 10       | 363                   | 40 | 323 | 627 | 10 | 11   | 98.4 | -                                    | -   | -  | -  | -    | -    | -   |
| Xpert alone*†                      | 10       | -                     | -  | -   | -   | -  | -    | -    | 38                                   | 931 | 19 | 12 | 67   | 98.8 | 26  |
| WHO screen then Xpert*†            | 10       | -                     | -  | -   | -   | -  | -    | -    | 34                                   | 931 | 19 | 16 | 64.5 | 98.4 | 29  |
| 5% prevalence                      |          |                       |    |     |     |    |      |      |                                      |     |    |    |      |      |     |
| W4SS                               | 50       | 690                   | 87 | 603 | 297 | 13 | 12.6 | 95.8 | -                                    | -   | -  | -  | -    | -    | -   |
| CRP ( $\geq 10$ mg/L)              | 50       | 430                   | 88 | 342 | 558 | 12 | 20.5 | 97.9 | -                                    | -   | -  | -  | -    | -    | -   |
| CRP ( $\geq 8$ mg/L)               | 50       | 468                   | 90 | 378 | 522 | 10 | 19.2 | 98.1 | -                                    | -   | -  | -  | -    | -    | -   |
| CRP ( $\geq 5$ mg/L)               | 50       | 560                   | 92 | 468 | 432 | 8  | 16.4 | 98.2 | -                                    | -   | -  | -  | -    | -    | -   |
| CXR (abnormal)                     | 50       | 451                   | 73 | 378 | 522 | 27 | 16.2 | 95.1 | -                                    | -   | -  | -  | -    | -    | -   |
| CXR (suggests tuberculosis)        | 50       | 298                   | 64 | 234 | 666 | 36 | 21.5 | 94.9 | -                                    | -   | -  | -  | -    | -    | -   |
| Cough (any)                        | 50       | 365                   | 59 | 306 | 594 | 41 | 16.2 | 93.5 | -                                    | -   | -  | -  | -    | -    | -   |
| Cough ( $\geq 2$ weeks)            | 50       | 240                   | 42 | 198 | 702 | 58 | 17.5 | 92.4 | -                                    | -   | -  | -  | -    | -    | -   |
| Hb ( $< 10$ g/dL)                  | 50       | 288                   | 54 | 234 | 666 | 46 | 18.8 | 93.5 | -                                    | -   | -  | -  | -    | -    | -   |
| Hb ( $< 8$ g/dL)                   | 50       | 59                    | 14 | 45  | 855 | 86 | 23.7 | 90.9 | -                                    | -   | -  | -  | -    | -    | -   |
| BMI ( $< 18.5$ kg/m <sup>2</sup> ) | 50       | 188                   | 35 | 153 | 747 | 65 | 18.6 | 92   | -                                    | -   | -  | -  | -    | -    | -   |
| Lymphadenopathy                    | 50       | 132                   | 33 | 99  | 801 | 67 | 25   | 92.3 | -                                    | -   | -  | -  | -    | -    | -   |
| W4SS with CRP ( $\geq 10$ mg/L)¶   | 50       | 786                   | 93 | 693 | 207 | 7  | 11.8 | 96.7 | -                                    | -   | -  | -  | -    | -    | -   |
| W4SS with CXR (abnormal)¶          | 50       | 870                   | 96 | 774 | 126 | 4  | 11   | 96.9 | -                                    | -   | -  | -  | -    | -    | -   |
| W4SS then CRP ( $\geq 5$ mg/L)¶    | 50       | 386                   | 80 | 306 | 594 | 20 | 20.7 | 96.7 | -                                    | -   | -  | -  | -    | -    | -   |
| Xpert alone*†                      | 50       | -                     | -  | -   | -   | -  | -    | -    | 77                                   | 882 | 18 | 23 | 81.1 | 97.5 | 13  |
| WHO screen then Xpert*†            | 50       | -                     | -  | -   | -   | -  | -    | -    | 69                                   | 882 | 18 | 31 | 79.3 | 96.6 | 14  |
| 10% prevalence                     |          |                       |    |     |     |    |      |      |                                      |     |    |    |      |      |     |

| Test                        | Total TB | Outcome of screening§ |     |     |     |     |      |      | Outcome of screening then diagnosis§ |     |    |    |      |      |     |
|-----------------------------|----------|-----------------------|-----|-----|-----|-----|------|------|--------------------------------------|-----|----|----|------|------|-----|
|                             |          | TP+FP‡                | TP  | FP  | TN  | FN  | PPV  | NPV  | TP                                   | TN  | FP | FN | PPV  | NPV  | NNS |
| W4SS                        | 100      | 710                   | 174 | 536 | 264 | 26  | 24.5 | 91   | -                                    | -   | -  | -  | -    | -    | -   |
| CRP (>=10 mg/L)             | 100      | 480                   | 176 | 304 | 496 | 24  | 36.7 | 95.4 | -                                    | -   | -  | -  | -    | -    | -   |
| CRP (>=8 mg/L)              | 100      | 516                   | 180 | 336 | 464 | 20  | 34.9 | 95.9 | -                                    | -   | -  | -  | -    | -    | -   |
| CRP (>=5 mg/L)              | 100      | 600                   | 184 | 416 | 384 | 16  | 30.7 | 96   | -                                    | -   | -  | -  | -    | -    | -   |
| CXR (abnormal)              | 100      | 482                   | 146 | 336 | 464 | 54  | 30.3 | 89.6 | -                                    | -   | -  | -  | -    | -    | -   |
| CXR (suggests tuberculosis) | 100      | 336                   | 128 | 208 | 592 | 72  | 38.1 | 89.2 | -                                    | -   | -  | -  | -    | -    | -   |
| Cough (any)                 | 100      | 390                   | 118 | 272 | 528 | 82  | 30.3 | 86.6 | -                                    | -   | -  | -  | -    | -    | -   |
| Cough (>=2 weeks)           | 100      | 260                   | 84  | 176 | 624 | 116 | 32.3 | 84.3 | -                                    | -   | -  | -  | -    | -    | -   |
| Hb (<10 g/dL)               | 100      | 316                   | 108 | 208 | 592 | 92  | 34.2 | 86.5 | -                                    | -   | -  | -  | -    | -    | -   |
| Hb (<8 g/dL)                | 100      | 68                    | 28  | 40  | 760 | 172 | 41.2 | 81.5 | -                                    | -   | -  | -  | -    | -    | -   |
| BMI (<18.5 kg/m²)           | 100      | 206                   | 70  | 136 | 664 | 130 | 34   | 83.6 | -                                    | -   | -  | -  | -    | -    | -   |
| Lymphadenopathy             | 100      | 154                   | 66  | 88  | 712 | 134 | 42.9 | 84.2 | -                                    | -   | -  | -  | -    | -    | -   |
| W4SS with CRP (>=10 mg/L)¶  | 100      | 802                   | 186 | 616 | 184 | 14  | 23.2 | 92.9 | -                                    | -   | -  | -  | -    | -    | -   |
| W4SS with CXR (abnormal)¶   | 100      | 880                   | 192 | 688 | 112 | 8   | 21.8 | 93.3 | -                                    | -   | -  | -  | -    | -    | -   |
| W4SS then CRP (>=5 mg/L)¶   | 100      | 432                   | 160 | 272 | 528 | 40  | 37   | 93   | -                                    | -   | -  | -  | -    | -    | -   |
| Xpert alone*†               | 100      | -                     | -   | -   | -   | -   | -    | -    | 154                                  | 784 | 16 | 46 | 90.6 | 94.5 | 6   |
| WHO screen then Xpert**†    | 100      | -                     | -   | -   | -   | -   | -    | -    | 138                                  | 784 | 16 | 62 | 89.6 | 92.7 | 7   |
| 20% prevalence              |          |                       |     |     |     |     |      |      |                                      |     |    |    |      |      |     |
| W4SS                        | 200      | 730                   | 261 | 469 | 231 | 39  | 35.8 | 85.6 | -                                    | -   | -  | -  | -    | -    | -   |
| CRP (>=10 mg/L)             | 200      | 530                   | 264 | 266 | 434 | 36  | 49.8 | 92.3 | -                                    | -   | -  | -  | -    | -    | -   |
| CRP (>=8 mg/L)              | 200      | 564                   | 270 | 294 | 406 | 30  | 47.9 | 93.1 | -                                    | -   | -  | -  | -    | -    | -   |
| CRP (>=5 mg/L)              | 200      | 640                   | 276 | 364 | 336 | 24  | 43.1 | 93.3 | -                                    | -   | -  | -  | -    | -    | -   |
| CXR (abnormal)              | 200      | 513                   | 219 | 294 | 406 | 81  | 42.7 | 83.4 | -                                    | -   | -  | -  | -    | -    | -   |
| CXR (suggests tuberculosis) | 200      | 374                   | 192 | 182 | 518 | 108 | 51.3 | 82.7 | -                                    | -   | -  | -  | -    | -    | -   |
| Cough (any)                 | 200      | 415                   | 177 | 238 | 462 | 123 | 42.7 | 79   | -                                    | -   | -  | -  | -    | -    | -   |
| Cough (>=2 weeks)           | 200      | 280                   | 126 | 154 | 546 | 174 | 45   | 75.8 | -                                    | -   | -  | -  | -    | -    | -   |
| Hb (<10 g/dL)               | 200      | 344                   | 162 | 182 | 518 | 138 | 47.1 | 79   | -                                    | -   | -  | -  | -    | -    | -   |
| Hb (<8 g/dL)                | 200      | 77                    | 42  | 35  | 665 | 258 | 54.5 | 72   | -                                    | -   | -  | -  | -    | -    | -   |
| BMI (<18.5 kg/m²)           | 200      | 224                   | 105 | 119 | 581 | 195 | 46.9 | 74.9 | -                                    | -   | -  | -  | -    | -    | -   |
| Lymphadenopathy             | 200      | 176                   | 99  | 77  | 623 | 201 | 56.3 | 75.6 | -                                    | -   | -  | -  | -    | -    | -   |
| W4SS with CRP (>=10 mg/L)¶  | 200      | 818                   | 279 | 539 | 161 | 21  | 34.1 | 88.5 | -                                    | -   | -  | -  | -    | -    | -   |
| W4SS with CXR (abnormal)¶   | 200      | 890                   | 288 | 602 | 98  | 12  | 32.4 | 89.1 | -                                    | -   | -  | -  | -    | -    | -   |
| W4SS then CRP (>=5 mg/L)¶   | 200      | 478                   | 240 | 238 | 462 | 60  | 50.2 | 88.5 | -                                    | -   | -  | -  | -    | -    | -   |
| Xpert alone*†               | 200      | -                     | -   | -   | -   | -   | -    | -    | 231                                  | 686 | 14 | 69 | 94.3 | 90.9 | 4   |
| WHO screen then Xpert**†    | 200      | -                     | -   | -   | -   | -   | -    | -    | 207                                  | 686 | 14 | 93 | 93.7 | 88.1 | 5   |

§Estimated using the pooled point estimates for sensitivity and specificity for different tests/strategies

‡TP+FP is the number of participants who screen positive (i.e. the number who need subsequent Xpert testing)

¶For parallel strategies, two screening tests are offered at the same time. For sequential strategies, a second screening test is offered only if the first screening test is positive

\*Accuracy measures for entire algorithm using total Xpert (sputum and/or non-sputum Xpert result)



|      |          | Outcome of screening§ |    |    |    |    |     |     | Outcome of screening then diagnosis§ |    |    |    |     |     |     |
|------|----------|-----------------------|----|----|----|----|-----|-----|--------------------------------------|----|----|----|-----|-----|-----|
| Test | Total TB | TP+FP†                | TP | FP | TN | FN | PPV | NPV | TP                                   | TN | FP | FN | PPV | NPV | NNS |

†The test accuracy of Xpert in those who were W4SS positive was: 12 studies; 2315 participants; sensitivity 0.79 (0.7-0.86), specificity 0.97 (0.95-0.98).

Definition of abbreviations: BMI = body mass index, CRP = C-reactive protein, CXR = chest X-ray, FN= false negative, FP = false positive, Hb = haemoglobin, NNS = number needed to screen, NPV = negative predictive value, PPV = positive predictive value, TB = tuberculosis, TN = true negative, TP = true positive, W4SS = WHO four-symptom screen

Table S10E - Yield of different screening and diagnostic algorithms at different prevalences when screening a population of 1000 participants with a CD4 cell count >200 cells/ $\mu$ L

| Test                               | Total TB | Outcome of screening§ |    |     |     |    |      |      | Outcome of screening then diagnosis§ |     |    |    |      |      |     |
|------------------------------------|----------|-----------------------|----|-----|-----|----|------|------|--------------------------------------|-----|----|----|------|------|-----|
|                                    |          | TP+FP‡                | TP | FP  | TN  | FN | PPV  | NPV  | TP                                   | TN  | FP | FN | PPV  | NPV  | NNS |
| 1% prevalence                      |          |                       |    |     |     |    |      |      |                                      |     |    |    |      |      |     |
| W4SS                               | 10       | 512                   | 7  | 505 | 485 | 3  | 1.4  | 99.4 | -                                    | -   | -  | -  | -    | -    | -   |
| CRP ( $\geq 10$ mg/L)              | 10       | 214                   | 6  | 208 | 782 | 4  | 3    | 99.6 | -                                    | -   | -  | -  | -    | -    | -   |
| CRP ( $\geq 8$ mg/L)               | 10       | 245                   | 7  | 238 | 752 | 3  | 2.7  | 99.6 | -                                    | -   | -  | -  | -    | -    | -   |
| CRP ( $\geq 5$ mg/L)               | 10       | 354                   | 8  | 346 | 644 | 2  | 2.2  | 99.7 | -                                    | -   | -  | -  | -    | -    | -   |
| CXR (abnormal)                     | 10       | 363                   | 7  | 356 | 634 | 3  | 1.8  | 99.5 | -                                    | -   | -  | -  | -    | -    | -   |
| CXR (suggests tuberculosis)        | 10       | 194                   | 6  | 188 | 802 | 4  | 3    | 99.5 | -                                    | -   | -  | -  | -    | -    | -   |
| Cough (any)                        | 10       | 243                   | 5  | 238 | 752 | 5  | 2.1  | 99.4 | -                                    | -   | -  | -  | -    | -    | -   |
| Cough ( $\geq 2$ weeks)            | 10       | 132                   | 3  | 129 | 861 | 7  | 2.6  | 99.2 | -                                    | -   | -  | -  | -    | -    | -   |
| Hb ( $< 10$ g/dL)                  | 10       | 160                   | 2  | 158 | 832 | 8  | 1.6  | 99.1 | -                                    | -   | -  | -  | -    | -    | -   |
| Hb ( $< 8$ g/dL)                   | 10       | 41                    | 1  | 40  | 950 | 9  | 1.5  | 99   | -                                    | -   | -  | -  | -    | -    | -   |
| BMI ( $< 18.5$ kg/m <sup>2</sup> ) | 10       | 81                    | 2  | 79  | 911 | 8  | 2.5  | 99.1 | -                                    | -   | -  | -  | -    | -    | -   |
| Lymphadenopathy                    | 10       | 102                   | 3  | 99  | 891 | 7  | 2.9  | 99.2 | -                                    | -   | -  | -  | -    | -    | -   |
| W4SS with CRP ( $\geq 10$ mg/L)¶   | 10       | 651                   | 8  | 643 | 347 | 2  | 1.2  | 99.4 | -                                    | -   | -  | -  | -    | -    | -   |
| W4SS with CXR (abnormal)¶          | 10       | 722                   | 9  | 713 | 277 | 1  | 1.3  | 99.7 | -                                    | -   | -  | -  | -    | -    | -   |
| W4SS then CRP ( $\geq 5$ mg/L)¶    | 10       | 204                   | 6  | 198 | 792 | 4  | 2.8  | 99.5 | -                                    | -   | -  | -  | -    | -    | -   |
| Xpert alone*†                      | 10       | -                     | -  | -   | -   | -  | -    | -    | 6                                    | 980 | 10 | 4  | 36.5 | 99.6 | 167 |
| WHO screen then Xpert*†            | 10       | -                     | -  | -   | -   | -  | -    | -    | 5                                    | 980 | 10 | 5  | 31.7 | 99.5 | 200 |
| 5% prevalence                      |          |                       |    |     |     |    |      |      |                                      |     |    |    |      |      |     |
| W4SS                               | 50       | 520                   | 36 | 484 | 466 | 14 | 6.8  | 97   | -                                    | -   | -  | -  | -    | -    | -   |
| CRP ( $\geq 10$ mg/L)              | 50       | 231                   | 32 | 199 | 751 | 18 | 14   | 97.7 | -                                    | -   | -  | -  | -    | -    | -   |
| CRP ( $\geq 8$ mg/L)               | 50       | 262                   | 34 | 228 | 722 | 16 | 12.8 | 97.8 | -                                    | -   | -  | -  | -    | -    | -   |
| CRP ( $\geq 5$ mg/L)               | 50       | 371                   | 39 | 332 | 618 | 11 | 10.5 | 98.2 | -                                    | -   | -  | -  | -    | -    | -   |
| CXR (abnormal)                     | 50       | 375                   | 33 | 342 | 608 | 17 | 8.8  | 97.3 | -                                    | -   | -  | -  | -    | -    | -   |
| CXR (suggests tuberculosis)        | 50       | 210                   | 30 | 180 | 770 | 20 | 14   | 97.4 | -                                    | -   | -  | -  | -    | -    | -   |
| Cough (any)                        | 50       | 254                   | 26 | 228 | 722 | 24 | 10.1 | 96.7 | -                                    | -   | -  | -  | -    | -    | -   |
| Cough ( $\geq 2$ weeks)            | 50       | 141                   | 17 | 124 | 826 | 33 | 12.1 | 96.2 | -                                    | -   | -  | -  | -    | -    | -   |
| Hb ( $< 10$ g/dL)                  | 50       | 164                   | 12 | 152 | 798 | 38 | 7.6  | 95.5 | -                                    | -   | -  | -  | -    | -    | -   |
| Hb ( $< 8$ g/dL)                   | 50       | 41                    | 3  | 38  | 912 | 47 | 7.3  | 95.1 | -                                    | -   | -  | -  | -    | -    | -   |
| BMI ( $< 18.5$ kg/m <sup>2</sup> ) | 50       | 86                    | 10 | 76  | 874 | 40 | 11.6 | 95.6 | -                                    | -   | -  | -  | -    | -    | -   |
| Lymphadenopathy                    | 50       | 110                   | 15 | 95  | 855 | 35 | 13.6 | 96.1 | -                                    | -   | -  | -  | -    | -    | -   |
| W4SS with CRP ( $\geq 10$ mg/L)¶   | 50       | 656                   | 39 | 617 | 333 | 11 | 5.9  | 96.8 | -                                    | -   | -  | -  | -    | -    | -   |
| W4SS with CXR (abnormal)¶          | 50       | 730                   | 46 | 684 | 266 | 4  | 6.2  | 98.3 | -                                    | -   | -  | -  | -    | -    | -   |
| W4SS then CRP ( $\geq 5$ mg/L)¶    | 50       | 219                   | 29 | 190 | 760 | 21 | 13   | 97.2 | -                                    | -   | -  | -  | -    | -    | -   |
| Xpert alone*†                      | 50       | -                     | -  | -   | -   | -  | -    | -    | 29                                   | 940 | 10 | 21 | 75   | 97.8 | 34  |
| WHO screen then Xpert*†            | 50       | -                     | -  | -   | -   | -  | -    | -    | 23                                   | 940 | 10 | 27 | 70.8 | 97.2 | 43  |
| 10% prevalence                     |          |                       |    |     |     |    |      |      |                                      |     |    |    |      |      |     |

| Test                        | Total TB | Outcome of screening§ |     |     |     |     |      |      | Outcome of screening then diagnosis§ |     |    |     |      |      |     |
|-----------------------------|----------|-----------------------|-----|-----|-----|-----|------|------|--------------------------------------|-----|----|-----|------|------|-----|
|                             |          | TP+FP‡                | TP  | FP  | TN  | FN  | PPV  | NPV  | TP                                   | TN  | FP | FN  | PPV  | NPV  | NNS |
| W4SS                        | 100      | 530                   | 71  | 459 | 441 | 29  | 13.4 | 93.8 | -                                    | -   | -  | -   | -    | -    | -   |
| CRP (>=10 mg/L)             | 100      | 254                   | 65  | 189 | 711 | 35  | 25.6 | 95.3 | -                                    | -   | -  | -   | -    | -    | -   |
| CRP (>=8 mg/L)              | 100      | 283                   | 67  | 216 | 684 | 33  | 23.7 | 95.4 | -                                    | -   | -  | -   | -    | -    | -   |
| CRP (>=5 mg/L)              | 100      | 393                   | 78  | 315 | 585 | 22  | 19.8 | 96.4 | -                                    | -   | -  | -   | -    | -    | -   |
| CXR (abnormal)              | 100      | 390                   | 66  | 324 | 576 | 34  | 16.9 | 94.4 | -                                    | -   | -  | -   | -    | -    | -   |
| CXR (suggests tuberculosis) | 100      | 230                   | 59  | 171 | 729 | 41  | 25.7 | 94.7 | -                                    | -   | -  | -   | -    | -    | -   |
| Cough (any)                 | 100      | 267                   | 51  | 216 | 684 | 49  | 19.1 | 93.3 | -                                    | -   | -  | -   | -    | -    | -   |
| Cough (>=2 weeks)           | 100      | 151                   | 34  | 117 | 783 | 66  | 22.5 | 92.2 | -                                    | -   | -  | -   | -    | -    | -   |
| Hb (<10 g/dL)               | 100      | 169                   | 25  | 144 | 756 | 75  | 14.8 | 91   | -                                    | -   | -  | -   | -    | -    | -   |
| Hb (<8 g/dL)                | 100      | 42                    | 6   | 36  | 864 | 94  | 14.3 | 90.2 | -                                    | -   | -  | -   | -    | -    | -   |
| BMI (<18.5 kg/m²)           | 100      | 92                    | 20  | 72  | 828 | 80  | 21.7 | 91.2 | -                                    | -   | -  | -   | -    | -    | -   |
| Lymphadenopathy             | 100      | 120                   | 30  | 90  | 810 | 70  | 25   | 92   | -                                    | -   | -  | -   | -    | -    | -   |
| W4SS with CRP (>=10 mg/L)¶  | 100      | 663                   | 78  | 585 | 315 | 22  | 11.8 | 93.5 | -                                    | -   | -  | -   | -    | -    | -   |
| W4SS with CXR (abnormal)¶   | 100      | 739                   | 91  | 648 | 252 | 9   | 12.3 | 96.6 | -                                    | -   | -  | -   | -    | -    | -   |
| W4SS then CRP (>=5 mg/L)¶   | 100      | 237                   | 57  | 180 | 720 | 43  | 24.1 | 94.4 | -                                    | -   | -  | -   | -    | -    | -   |
| Xpert alone*†               | 100      | -                     | -   | -   | -   | -   | -    | -    | 57                                   | 891 | 9  | 43  | 86.4 | 95.4 | 18  |
| WHO screen then Xpert**†    | 100      | -                     | -   | -   | -   | -   | -    | -    | 46                                   | 891 | 9  | 54  | 83.6 | 94.3 | 22  |
| 20% prevalence              |          |                       |     |     |     |     |      |      |                                      |     |    |     |      |      |     |
| W4SS                        | 200      | 550                   | 142 | 408 | 392 | 58  | 25.8 | 87.1 | -                                    | -   | -  | -   | -    | -    | -   |
| CRP (>=10 mg/L)             | 200      | 298                   | 130 | 168 | 632 | 70  | 43.6 | 90   | -                                    | -   | -  | -   | -    | -    | -   |
| CRP (>=8 mg/L)              | 200      | 326                   | 134 | 192 | 608 | 66  | 41.1 | 90.2 | -                                    | -   | -  | -   | -    | -    | -   |
| CRP (>=5 mg/L)              | 200      | 436                   | 156 | 280 | 520 | 44  | 35.8 | 92.2 | -                                    | -   | -  | -   | -    | -    | -   |
| CXR (abnormal)              | 200      | 420                   | 132 | 288 | 512 | 68  | 31.4 | 88.3 | -                                    | -   | -  | -   | -    | -    | -   |
| CXR (suggests tuberculosis) | 200      | 270                   | 118 | 152 | 648 | 82  | 43.7 | 88.8 | -                                    | -   | -  | -   | -    | -    | -   |
| Cough (any)                 | 200      | 294                   | 102 | 192 | 608 | 98  | 34.7 | 86.1 | -                                    | -   | -  | -   | -    | -    | -   |
| Cough (>=2 weeks)           | 200      | 172                   | 68  | 104 | 696 | 132 | 39.5 | 84.1 | -                                    | -   | -  | -   | -    | -    | -   |
| Hb (<10 g/dL)               | 200      | 178                   | 50  | 128 | 672 | 150 | 28.1 | 81.8 | -                                    | -   | -  | -   | -    | -    | -   |
| Hb (<8 g/dL)                | 200      | 44                    | 12  | 32  | 768 | 188 | 27.3 | 80.3 | -                                    | -   | -  | -   | -    | -    | -   |
| BMI (<18.5 kg/m²)           | 200      | 104                   | 40  | 64  | 736 | 160 | 38.5 | 82.1 | -                                    | -   | -  | -   | -    | -    | -   |
| Lymphadenopathy             | 200      | 140                   | 60  | 80  | 720 | 140 | 42.9 | 83.7 | -                                    | -   | -  | -   | -    | -    | -   |
| W4SS with CRP (>=10 mg/L)¶  | 200      | 676                   | 156 | 520 | 280 | 44  | 23.1 | 86.4 | -                                    | -   | -  | -   | -    | -    | -   |
| W4SS with CXR (abnormal)¶   | 200      | 758                   | 182 | 576 | 224 | 18  | 24   | 92.6 | -                                    | -   | -  | -   | -    | -    | -   |
| W4SS then CRP (>=5 mg/L)¶   | 200      | 274                   | 114 | 160 | 640 | 86  | 41.6 | 88.2 | -                                    | -   | -  | -   | -    | -    | -   |
| Xpert alone*†               | 200      | -                     | -   | -   | -   | -   | -    | -    | 114                                  | 792 | 8  | 86  | 93.4 | 90.2 | 9   |
| WHO screen then Xpert**†    | 200      | -                     | -   | -   | -   | -   | -    | -    | 92                                   | 792 | 8  | 108 | 92   | 88   | 11  |

§Estimated using the pooled point estimates for sensitivity and specificity for different tests/strategies

‡TP+FP is the number of participants who screen positive (i.e. the number who need subsequent Xpert testing)

¶For parallel strategies, two screening tests are offered at the same time. For sequential strategies, a second screening test is offered only if the first screening test is positive

\*Accuracy measures for entire algorithm using total Xpert (sputum and/or non-sputum Xpert result)

|      |          | Outcome of screening§ |    |    |    |    |     |     | Outcome of screening then diagnosis§ |    |    |    |     |     |     |
|------|----------|-----------------------|----|----|----|----|-----|-----|--------------------------------------|----|----|----|-----|-----|-----|
| Test | Total TB | TP+FP†                | TP | FP | TN | FN | PPV | NPV | TP                                   | TN | FP | FN | PPV | NPV | NNS |

†The test accuracy of Xpert in those who were W4SS positive was: 12 studies; 2121 participants; sensitivity 0.64 (0.54-0.74), specificity 0.99 (0.98-0.99).

Definition of abbreviations: BMI = body mass index, CRP = C-reactive protein, CXR = chest X-ray, FN= false negative, FP = false positive, Hb = haemoglobin, NNS = number needed to screen, NPV = negative predictive value, PPV = positive predictive value, TB = tuberculosis, TN = true negative, TP = true positive, W4SS = WHO four-symptom screen

Table S10F - Yield of different screening and diagnostic algorithms at different prevalences when screening a population of 1000 pregnant participants#

| Test                        | Total TB | Outcome of screening§ |    |     |     |    |      |      | Outcome of screening then diagnosis§ |     |    |    |      |      |     |
|-----------------------------|----------|-----------------------|----|-----|-----|----|------|------|--------------------------------------|-----|----|----|------|------|-----|
|                             |          | TP+FP‡                | TP | FP  | TN  | FN | PPV  | NPV  | TP                                   | TN  | FP | FN | PPV  | NPV  | NNS |
| 1% prevalence               |          |                       |    |     |     |    |      |      |                                      |     |    |    |      |      |     |
| W4SS                        | 10       | 424                   | 8  | 416 | 574 | 2  | 2    | 99.7 | -                                    | -   | -  | -  | -    | -    | -   |
| CRP (>=10 mg/L)             | 10       | -                     | -  | -   | -   | -  | -    | -    | -                                    | -   | -  | -  | -    | -    | -   |
| CRP (>=8 mg/L)              | 10       | -                     | -  | -   | -   | -  | -    | -    | -                                    | -   | -  | -  | -    | -    | -   |
| CRP (>=5 mg/L)              | 10       | -                     | -  | -   | -   | -  | -    | -    | -                                    | -   | -  | -  | -    | -    | -   |
| CXR (abnormal)              | 10       | 315                   | 8  | 307 | 683 | 2  | 2.4  | 99.6 | -                                    | -   | -  | -  | -    | -    | -   |
| CXR (suggests tuberculosis) | 10       | 77                    | 8  | 69  | 921 | 2  | 9.8  | 99.7 | -                                    | -   | -  | -  | -    | -    | -   |
| Cough (any)                 | 10       | 195                   | 7  | 188 | 802 | 3  | 3.4  | 99.6 | -                                    | -   | -  | -  | -    | -    | -   |
| Cough (>=2 weeks)           | 10       | 84                    | 5  | 79  | 911 | 5  | 5.6  | 99.4 | -                                    | -   | -  | -  | -    | -    | -   |
| Hb (<10 g/dL)               | 10       | 250                   | 2  | 248 | 742 | 8  | 0.8  | 98.9 | -                                    | -   | -  | -  | -    | -    | -   |
| Hb (<8 g/dL)                | 10       | 20                    | 0  | 20  | 970 | 10 | 0    | 99   | -                                    | -   | -  | -  | -    | -    | -   |
| BMI (<18.5 kg/m²)           | 10       | 40                    | 0  | 40  | 950 | 10 | 0    | 99   | -                                    | -   | -  | -  | -    | -    | -   |
| Lymphadenopathy             | 10       | -                     | -  | -   | -   | -  | -    | -    | -                                    | -   | -  | -  | -    | -    | -   |
| W4SS with CRP (>=10 mg/L)¶  | 10       | -                     | -  | -   | -   | -  | -    | -    | -                                    | -   | -  | -  | -    | -    | -   |
| W4SS with CXR (abnormal)¶   | 10       | 444                   | 8  | 436 | 554 | 2  | 1.7  | 99.6 | -                                    | -   | -  | -  | -    | -    | -   |
| W4SS then CRP (>=5 mg/L)¶   | 10       | -                     | -  | -   | -   | -  | -    | -    | -                                    | -   | -  | -  | -    | -    | -   |
| Xpert alone*†               | 10       | -                     | -  | -   | -   | -  | -    | -    | 5                                    | 980 | 10 | 5  | 34.9 | 99.5 | 200 |
| WHO screen then Xpert*†     | 10       | -                     | -  | -   | -   | -  | -    | -    | 4                                    | 990 | 0  | 6  | 100  | 99.4 | 250 |
| 5% prevalence               |          |                       |    |     |     |    |      |      |                                      |     |    |    |      |      |     |
| W4SS                        | 50       | 441                   | 42 | 399 | 551 | 8  | 9.5  | 98.6 | -                                    | -   | -  | -  | -    | -    | -   |
| CRP (>=10 mg/L)             | 50       | -                     | -  | -   | -   | -  | -    | -    | -                                    | -   | -  | -  | -    | -    | -   |
| CRP (>=8 mg/L)              | 50       | -                     | -  | -   | -   | -  | -    | -    | -                                    | -   | -  | -  | -    | -    | -   |
| CRP (>=5 mg/L)              | 50       | -                     | -  | -   | -   | -  | -    | -    | -                                    | -   | -  | -  | -    | -    | -   |
| CXR (abnormal)              | 50       | 332                   | 38 | 294 | 656 | 12 | 11.3 | 98.1 | -                                    | -   | -  | -  | -    | -    | -   |
| CXR (suggests tuberculosis) | 50       | 104                   | 38 | 66  | 884 | 12 | 36.1 | 98.6 | -                                    | -   | -  | -  | -    | -    | -   |
| Cough (any)                 | 50       | 214                   | 34 | 180 | 770 | 16 | 15.7 | 97.9 | -                                    | -   | -  | -  | -    | -    | -   |
| Cough (>=2 weeks)           | 50       | 100                   | 24 | 76  | 874 | 26 | 23.6 | 97.1 | -                                    | -   | -  | -  | -    | -    | -   |
| Hb (<10 g/dL)               | 50       | 248                   | 10 | 238 | 712 | 40 | 4    | 94.7 | -                                    | -   | -  | -  | -    | -    | -   |
| Hb (<8 g/dL)                | 50       | 19                    | 0  | 19  | 931 | 50 | 0    | 94.9 | -                                    | -   | -  | -  | -    | -    | -   |
| BMI (<18.5 kg/m²)           | 50       | 38                    | 0  | 38  | 912 | 50 | 0    | 94.8 | -                                    | -   | -  | -  | -    | -    | -   |
| Lymphadenopathy             | 50       | -                     | -  | -   | -   | -  | -    | -    | -                                    | -   | -  | -  | -    | -    | -   |
| W4SS with CRP (>=10 mg/L)¶  | 50       | -                     | -  | -   | -   | -  | -    | -    | -                                    | -   | -  | -  | -    | -    | -   |
| W4SS with CXR (abnormal)¶   | 50       | 456                   | 38 | 418 | 532 | 12 | 8.2  | 97.7 | -                                    | -   | -  | -  | -    | -    | -   |
| W4SS then CRP (>=5 mg/L)¶   | 50       | -                     | -  | -   | -   | -  | -    | -    | -                                    | -   | -  | -  | -    | -    | -   |
| Xpert alone*†               | 50       | -                     | -  | -   | -   | -  | -    | -    | 26                                   | 940 | 10 | 24 | 73.6 | 97.6 | 38  |
| WHO screen then Xpert*†     | 50       | -                     | -  | -   | -   | -  | -    | -    | 18                                   | 950 | 0  | 32 | 100  | 96.7 | 56  |
| 10% prevalence              |          |                       |    |     |     |    |      |      |                                      |     |    |    |      |      |     |

| Test                        | Total TB | Outcome of screening§ |     |     |     |     |      |      | Outcome of screening then diagnosis§ |     |    |     |      |      |     |
|-----------------------------|----------|-----------------------|-----|-----|-----|-----|------|------|--------------------------------------|-----|----|-----|------|------|-----|
|                             |          | TP+FP‡                | TP  | FP  | TN  | FN  | PPV  | NPV  | TP                                   | TN  | FP | FN  | PPV  | NPV  | NNS |
| W4SS                        | 100      | 462                   | 84  | 378 | 522 | 16  | 18.2 | 97   | -                                    | -   | -  | -   | -    | -    | -   |
| CRP (>=10 mg/L)             | 100      | -                     | -   | -   | -   | -   | -    | -    | -                                    | -   | -  | -   | -    | -    | -   |
| CRP (>=8 mg/L)              | 100      | -                     | -   | -   | -   | -   | -    | -    | -                                    | -   | -  | -   | -    | -    | -   |
| CRP (>=5 mg/L)              | 100      | -                     | -   | -   | -   | -   | -    | -    | -                                    | -   | -  | -   | -    | -    | -   |
| CXR (abnormal)              | 100      | 354                   | 75  | 279 | 621 | 25  | 21.2 | 96.1 | -                                    | -   | -  | -   | -    | -    | -   |
| CXR (suggests tuberculosis) | 100      | 138                   | 75  | 63  | 837 | 25  | 54.3 | 97.1 | -                                    | -   | -  | -   | -    | -    | -   |
| Cough (any)                 | 100      | 238                   | 67  | 171 | 729 | 33  | 28.2 | 95.7 | -                                    | -   | -  | -   | -    | -    | -   |
| Cough (>=2 weeks)           | 100      | 119                   | 47  | 72  | 828 | 53  | 39.5 | 94   | -                                    | -   | -  | -   | -    | -    | -   |
| Hb (<10 g/dL)               | 100      | 245                   | 20  | 225 | 675 | 80  | 8.2  | 89.4 | -                                    | -   | -  | -   | -    | -    | -   |
| Hb (<8 g/dL)                | 100      | 18                    | 0   | 18  | 882 | 100 | 0    | 89.8 | -                                    | -   | -  | -   | -    | -    | -   |
| BMI (<18.5 kg/m²)           | 100      | 36                    | 0   | 36  | 864 | 100 | 0    | 89.6 | -                                    | -   | -  | -   | -    | -    | -   |
| Lymphadenopathy             | 100      | -                     | -   | -   | -   | -   | -    | -    | -                                    | -   | -  | -   | -    | -    | -   |
| W4SS with CRP (>=10 mg/L)¶  | 100      | -                     | -   | -   | -   | -   | -    | -    | -                                    | -   | -  | -   | -    | -    | -   |
| W4SS with CXR (abnormal)¶   | 100      | 471                   | 75  | 396 | 504 | 25  | 15.9 | 95.3 | -                                    | -   | -  | -   | -    | -    | -   |
| W4SS then CRP (>=5 mg/L)¶   | 100      | -                     | -   | -   | -   | -   | -    | -    | -                                    | -   | -  | -   | -    | -    | -   |
| Xpert alone*†               | 100      | -                     | -   | -   | -   | -   | -    | -    | 53                                   | 891 | 9  | 47  | 85.5 | 95   | 19  |
| WHO screen then Xpert*†     | 100      | -                     | -   | -   | -   | -   | -    | -    | 36                                   | 900 | 0  | 64  | 100  | 93.4 | 28  |
|                             |          | 20% prevalence        |     |     |     |     |      |      |                                      |     |    |     |      |      |     |
| W4SS                        | 200      | 504                   | 168 | 336 | 464 | 32  | 33.3 | 93.5 | -                                    | -   | -  | -   | -    | -    | -   |
| CRP (>=10 mg/L)             | 200      | -                     | -   | -   | -   | -   | -    | -    | -                                    | -   | -  | -   | -    | -    | -   |
| CRP (>=8 mg/L)              | 200      | -                     | -   | -   | -   | -   | -    | -    | -                                    | -   | -  | -   | -    | -    | -   |
| CRP (>=5 mg/L)              | 200      | -                     | -   | -   | -   | -   | -    | -    | -                                    | -   | -  | -   | -    | -    | -   |
| CXR (abnormal)              | 200      | 398                   | 150 | 248 | 552 | 50  | 37.7 | 91.7 | -                                    | -   | -  | -   | -    | -    | -   |
| CXR (suggests tuberculosis) | 200      | 206                   | 150 | 56  | 744 | 50  | 72.8 | 93.7 | -                                    | -   | -  | -   | -    | -    | -   |
| Cough (any)                 | 200      | 286                   | 134 | 152 | 648 | 66  | 46.9 | 90.8 | -                                    | -   | -  | -   | -    | -    | -   |
| Cough (>=2 weeks)           | 200      | 158                   | 94  | 64  | 736 | 106 | 59.5 | 87.4 | -                                    | -   | -  | -   | -    | -    | -   |
| Hb (<10 g/dL)               | 200      | 240                   | 40  | 200 | 600 | 160 | 16.7 | 78.9 | -                                    | -   | -  | -   | -    | -    | -   |
| Hb (<8 g/dL)                | 200      | 16                    | 0   | 16  | 784 | 200 | 0    | 79.7 | -                                    | -   | -  | -   | -    | -    | -   |
| BMI (<18.5 kg/m²)           | 200      | 32                    | 0   | 32  | 768 | 200 | 0    | 79.3 | -                                    | -   | -  | -   | -    | -    | -   |
| Lymphadenopathy             | 200      | -                     | -   | -   | -   | -   | -    | -    | -                                    | -   | -  | -   | -    | -    | -   |
| W4SS with CRP (>=10 mg/L)¶  | 200      | -                     | -   | -   | -   | -   | -    | -    | -                                    | -   | -  | -   | -    | -    | -   |
| W4SS with CXR (abnormal)¶   | 200      | 502                   | 150 | 352 | 448 | 50  | 29.9 | 90   | -                                    | -   | -  | -   | -    | -    | -   |
| W4SS then CRP (>=5 mg/L)¶   | 200      | -                     | -   | -   | -   | -   | -    | -    | -                                    | -   | -  | -   | -    | -    | -   |
| Xpert alone*†               | 200      | -                     | -   | -   | -   | -   | -    | -    | 106                                  | 792 | 8  | 94  | 93   | 89.4 | 9   |
| WHO screen then Xpert*†     | 200      | -                     | -   | -   | -   | -   | -    | -    | 72                                   | 800 | 0  | 128 | 100  | 86.2 | 14  |

#For lymphadenopathy and strategies containing CRP, there were insufficient data to perform meta-analysis

§Estimated using the pooled point estimates for sensitivity and specificity for different tests/strategies

‡TP+FP is the number of participants who screen positive (i.e. the number who need subsequent Xpert testing)

¶For parallel strategies, two screening tests are offered at the same time. For sequential strategies, a second screening test is offered only if the first screening test is positive

|      |          | Outcome of screening§ |    |    |    |    |     |     | Outcome of screening then diagnosis§ |    |    |    |     |     |     |
|------|----------|-----------------------|----|----|----|----|-----|-----|--------------------------------------|----|----|----|-----|-----|-----|
| Test | Total TB | TP+FP†                | TP | FP | TN | FN | PPV | NPV | TP                                   | TN | FP | FN | PPV | NPV | NNS |

\*Accuracy measures for entire algorithm using total Xpert (sputum and/or non-sputum Xpert result)

†The test accuracy of Xpert in those who were W4SS positive was: 5 studies; 137 participants; sensitivity 0.71 (0.33-0.93), specificity 1 (0-1).

Definition of abbreviations: BMI = body mass index, CRP = C-reactive protein, CXR = chest X-ray, FN= false negative, FP = false positive, Hb = haemoglobin, NNS = number needed to screen, NPV = negative predictive value, PPV = positive predictive value, TB = tuberculosis, TN = true negative, TP = true positive, W4SS = WHO four-symptom screen

**Table S11 - Sensitivity analyses using different reference standards**

Table S11A - Sensitivity analyses using different reference standards in all participants

|                                        | Sensitivity analyses 1* |       |                      |                      | Sensitivity analyses 2† |      |                      |                      |
|----------------------------------------|-------------------------|-------|----------------------|----------------------|-------------------------|------|----------------------|----------------------|
|                                        | No of studies           | N     | Sensitivity (95% CI) | Specificity (95% CI) | No of studies           | N    | Sensitivity (95% CI) | Specificity (95% CI) |
| <b>W4SS</b>                            | 21                      | 15652 | 82 (71-89)           | 42 (29-57)           | 12                      | 8612 | 88 (76-94)           | 43 (27-61)           |
| <b>CRP (&gt;=10 mg/L)</b>              | 5                       | 3582  | 73 (49-88)           | 74 (62-83)           | 4                       | 3110 | 77 (35-95)           | 72 (56-84)           |
| <b>CRP (&gt;=8 mg/L)</b>               | 5                       | 3582  | 77 (58-89)           | 70 (57-81)           | 4                       | 3110 | 78 (31-96)           | 69 (52-82)           |
| <b>CRP (&gt;=5 mg/L)</b>               | 5                       | 3582  | 85 (72-93)           | 60 (48-71)           | 4                       | 3110 | 88 (62-97)           | 59 (43-72)           |
| <b>CXR (abnormal)</b>                  | 8                       | 6222  | 72 (65-78)           | 62 (52-71)           | 4                       | 4190 | 73 (65-79)           | 65 (55-74)           |
| <b>CXR (suggests tuberculosis)</b>     | 8                       | 6177  | 63 (56-70)           | 78 (67-86)           | 3                       | 3749 | 64 (52-74)           | 84 (68-93)           |
| <b>Cough (any)</b>                     | 21                      | 15623 | 56 (48-63)           | 73 (65-79)           | 12                      | 8586 | 63 (55-71)           | 73 (64-80)           |
| <b>Cough (&gt;=2 weeks)</b>            | 17                      | 10919 | 38 (28-49)           | 84 (77-90)           | 9                       | 4545 | 38 (21-58)           | 86 (76-92)           |
| <b>Hb (&lt;10 g/dL)</b>                | 9                       | 5118  | 43 (33-53)           | 80 (73-85)           | 5                       | 2098 | 57 (41-72)           | 76 (63-86)           |
| <b>Hb (&lt;8 g/dL)</b>                 | 9                       | 5118  | 12 (9-15)            | 96 (93-97)           | 5                       | 2098 | 13 (9-19)            | 94 (89-97)           |
| <b>BMI (&lt;18.5 kg/m<sup>2</sup>)</b> | 18                      | 12704 | 29 (21-37)           | 89 (84-92)           | 12                      | 8464 | 38 (26-51)           | 87 (80-91)           |
| <b>Lymphadenopathy</b>                 | 4                       | 2394  | 30 (14-54)           | 91 (75-97)           | 3                       | 1404 | 23 (13-38)           | 94 (84-98)           |
| <b>W4SS with CRP (&gt;=10 mg/L)¶</b>   | 5                       | 3582  | 87 (56-97)           | 31 (13-56)           | 4                       | 3110 | 94 (46-100)          | 30 (10-63)           |
| <b>W4SS with CXR (abnormal)¶</b>       | 8                       | 6213  | 95 (90-97)           | 21 (10-38)           | 4                       | 4182 | 95 (87-99)           | 31 (15-55)           |
| <b>W4SS then CRP (&gt;=5 mg/L)¶</b>    | 5                       | 3582  | 66 (25-92)           | 75 (54-88)           | 4                       | 3110 | 72 (24-96)           | 75 (47-91)           |

\*Diagnostic accuracy estimates using culture or Xpert of sputum and/or other specimens as a reference standard

†Diagnostic accuracy estimates using only Xpert of sputum and/or other specimens as a reference standard

¶For parallel strategies, two screening tests are offered at the same time. For sequential strategies, a second screening test is offered only if the first screening test is positive

Definition of abbreviations: BMI = body mass index, CRP = C-reactive protein, CXR = chest X-ray, Hb = haemoglobin, W4SS = WHO four-symptom screen



Table S11B - Sensitivity analyses using different reference standards in outpatients (on ART)

|                                                      | Sensitivity analyses 1* |      |                      |                      | Sensitivity analyses 2† |      |                      |                      |
|------------------------------------------------------|-------------------------|------|----------------------|----------------------|-------------------------|------|----------------------|----------------------|
|                                                      | No of studies           | N    | Sensitivity (95% CI) | Specificity (95% CI) | No of studies           | N    | Sensitivity (95% CI) | Specificity (95% CI) |
| <b>W4SS</b>                                          | 9                       | 4328 | 56 (32-77)           | 71 (51-85)           | 4                       | 2664 | 51 (20-82)           | 80 (67-88)           |
| <b>CRP (<math>\geq 10</math> mg/L)</b>               | 1                       | 381  | 12 (2-54)            | 90 (93-87)           | 1                       | 378  | 10 (1-67)            | 90 (93-87)           |
| <b>CRP (<math>\geq 8</math> mg/L)</b>                | 1                       | 381  | 25 (6-62)            | 89 (92-85)           | 1                       | 378  | 10 (1-67)            | 88 (91-85)           |
| <b>CRP (<math>\geq 5</math> mg/L)</b>                | 1                       | 381  | 38 (13-72)           | 80 (84-76)           | 1                       | 378  | 25 (3-76)            | 79 (83-75)           |
| <b>CXR (abnormal)</b>                                | 4                       | 2679 | 72 (61-82)           | 64 (50-75)           | 2                       | 2063 | 69 (56-80)           | 72 (64-79)           |
| <b>CXR (suggests tuberculosis)</b>                   | 4                       | 2590 | 69 (52-82)           | 78 (62-89)           | 1                       | 1745 | 55 (40-69)           | 92 (93-91)           |
| <b>Cough (any)</b>                                   | 9                       | 4328 | 41 (22-62)           | 83 (73-90)           | 4                       | 2664 | 43 (29-58)           | 88 (85-91)           |
| <b>Cough (<math>\geq 2</math> weeks)</b>             | 6                       | 1746 | 18 (4-51)            | 93 (79-98)           | 2                       | 536  | 13 (0-86)            | 97 (94-98)           |
| <b>Hb (<math>&lt; 10</math> g/dL)</b>                | 4                       | 844  | 49 (30-68)           | 83 (71-90)           | 2                       | 629  | 18 (0-93)            | 77 (61-88)           |
| <b>Hb (<math>&lt; 8</math> g/dL)</b>                 | 4                       | 844  | 13 (4-31)            | 94 (91-96)           | 2                       | 629  | 10 (2-37)            | 93 (90-94)           |
| <b>BMI (<math>&lt; 18.5</math> kg/m<sup>2</sup>)</b> | 7                       | 4054 | 17 (8-32)            | 93 (88-96)           | 4                       | 2646 | 14 (1-76)            | 89 (82-94)           |
| <b>Lymphadenopathy</b>                               | 1                       | 338  | 17 (7-38)            | 93 (95-90)           | 1                       | 338  | 11 (3-34)            | 92 (95-89)           |
| <b>W4SS with CRP (<math>\geq 10</math> mg/L)¶</b>    | 1                       | 381  | 12 (2-54)            | 79 (83-75)           | 1                       | 378  | 10 (1-67)            | 79 (83-75)           |
| <b>W4SS with CXR (abnormal)¶</b>                     | 4                       | 2679 | 90 (73-97)           | 33 (17-55)           | 2                       | 2063 | 87 (62-97)           | 51 (33-70)           |
| <b>W4SS then CRP (<math>\geq 5</math> mg/L)¶</b>     | 1                       | 381  | 6 (0-50)             | 96 (97-93)           | 1                       | 378  | 10 (1-67)            | 96 (97-93)           |

\*Diagnostic accuracy estimates using culture or Xpert of sputum and/or other specimens as a reference standard

†Diagnostic accuracy estimates using only Xpert of sputum and/or other specimens as a reference standard

¶For parallel strategies, two screening tests are offered at the same time. For sequential strategies, a second screening test is offered only if the first screening test is positive

Definition of abbreviations: BMI = body mass index, CRP = C-reactive protein, CXR = chest X-ray, Hb = haemoglobin, W4SS = WHO four-symptom screen

Table S11C - Sensitivity analyses using different reference standards in outpatients (not on ART)

|                                        | Sensitivity analyses 1* |       |                      |                      | Sensitivity analyses 2† |      |                      |                      |
|----------------------------------------|-------------------------|-------|----------------------|----------------------|-------------------------|------|----------------------|----------------------|
|                                        | No of studies           | N     | Sensitivity (95% CI) | Specificity (95% CI) | No of studies           | N    | Sensitivity (95% CI) | Specificity (95% CI) |
| <b>W4SS</b>                            | 20                      | 11196 | 85 (76-91)           | 37 (26-51)           | 11                      | 5820 | 90 (80-96)           | 37 (24-53)           |
| <b>CRP (&gt;=10 mg/L)</b>              | 5                       | 3198  | 82 (77-86)           | 67 (61-73)           | 4                       | 2729 | 89 (85-92)           | 63 (56-70)           |
| <b>CRP (&gt;=8 mg/L)</b>               | 5                       | 3198  | 84 (81-87)           | 64 (57-70)           | 4                       | 2729 | 90 (86-94)           | 59 (51-67)           |
| <b>CRP (&gt;=5 mg/L)</b>               | 5                       | 3198  | 89 (85-91)           | 54 (46-61)           | 4                       | 2729 | 93 (89-96)           | 50 (42-59)           |
| <b>CXR (abnormal)</b>                  | 8                       | 3543  | 72 (65-78)           | 62 (52-72)           | 4                       | 2127 | 73 (64-80)           | 66 (54-76)           |
| <b>CXR (suggests tuberculosis)</b>     | 8                       | 3587  | 62 (55-69)           | 79 (67-87)           | 3                       | 2004 | 64 (52-74)           | 85 (67-94)           |
| <b>Cough (any)</b>                     | 20                      | 11167 | 58 (51-65)           | 70 (63-76)           | 11                      | 5794 | 66 (59-73)           | 69 (62-75)           |
| <b>Cough (&gt;=2 weeks)</b>            | 16                      | 9045  | 43 (34-52)           | 82 (75-87)           | 8                       | 3881 | 48 (33-63)           | 81 (72-87)           |
| <b>Hb (&lt;10 g/dL)</b>                | 9                       | 4271  | 44 (33-56)           | 79 (71-85)           | 5                       | 1466 | 62 (43-78)           | 74 (58-85)           |
| <b>Hb (&lt;8 g/dL)</b>                 | 9                       | 4271  | 11 (8-15)            | 96 (93-98)           | 5                       | 1466 | 14 (10-20)           | 94 (87-97)           |
| <b>BMI (&lt;18.5 kg/m<sup>2</sup>)</b> | 17                      | 8522  | 31 (23-40)           | 87 (82-92)           | 11                      | 5690 | 42 (29-56)           | 85 (76-91)           |
| <b>Lymphadenopathy</b>                 | 4                       | 2056  | 30 (13-54)           | 91 (76-97)           | 3                       | 1066 | 25 (13-43)           | 95 (86-98)           |
| <b>W4SS with CRP (&gt;=10 mg/L)¶</b>   | 5                       | 3198  | 94 (86-98)           | 20 (12-33)           | 4                       | 2729 | 98 (93-100)          | 17 (9-30)            |
| <b>W4SS with CXR (abnormal)¶</b>       | 8                       | 3534  | 95 (92-98)           | 18 (9-34)            | 4                       | 2119 | 96 (91-99)           | 29 (15-50)           |
| <b>W4SS then CRP (&gt;=5 mg/L)¶</b>    | 5                       | 3198  | 83 (74-89)           | 64 (57-70)           | 4                       | 2729 | 89 (84-92)           | 60 (52-68)           |

\*Diagnostic accuracy estimates using culture or Xpert of sputum and/or other specimens as a reference standard

†Diagnostic accuracy estimates using only Xpert of sputum and/or other specimens as a reference standard

¶For parallel strategies, two screening tests are offered at the same time. For sequential strategies, a second screening test is offered only if the first screening test is positive

Definition of abbreviations: BMI = body mass index, CRP = C-reactive protein, CXR = chest X-ray, Hb = haemoglobin, W4SS = WHO four-symptom screen

Table S11D - Sensitivity analyses using different reference standards in participants with CD4 cell count  $\leq 200$  cells/ $\mu$ L

|                                                      | Sensitivity analyses 1* |      |                      |                      | Sensitivity analyses 2† |      |                      |                      |
|------------------------------------------------------|-------------------------|------|----------------------|----------------------|-------------------------|------|----------------------|----------------------|
|                                                      | No of studies           | N    | Sensitivity (95% CI) | Specificity (95% CI) | No of studies           | N    | Sensitivity (95% CI) | Specificity (95% CI) |
| <b>W4SS</b>                                          | 21                      | 5636 | 88 (78-93)           | 33 (20-49)           | 12                      | 3129 | 90 (78-96)           | 35 (19-55)           |
| <b>CRP (<math>\geq 10</math> mg/L)</b>               | 5                       | 1597 | 88 (82-92)           | 63 (50-73)           | 4                       | 1460 | 91 (84-95)           | 62 (48-75)           |
| <b>CRP (<math>\geq 8</math> mg/L)</b>                | 5                       | 1597 | 90 (86-93)           | 59 (46-71)           | 4                       | 1460 | 93 (86-97)           | 58 (43-72)           |
| <b>CRP (<math>\geq 5</math> mg/L)</b>                | 5                       | 1597 | 92 (88-95)           | 48 (34-63)           | 4                       | 1460 | 94 (88-97)           | 49 (33-65)           |
| <b>CXR (abnormal)</b>                                | 8                       | 2210 | 74 (65-80)           | 58 (49-67)           | 4                       | 1311 | 72 (62-80)           | 61 (49-71)           |
| <b>CXR (suggests tuberculosis)</b>                   | 8                       | 2143 | 64 (56-71)           | 74 (64-82)           | 3                       | 1157 | 61 (49-71)           | 81 (63-91)           |
| <b>Cough (any)</b>                                   | 21                      | 5626 | 59 (52-66)           | 67 (59-74)           | 12                      | 3119 | 65 (56-73)           | 67 (58-75)           |
| <b>Cough (<math>\geq 2</math> weeks)</b>             | 17                      | 4203 | 42 (33-50)           | 78 (70-85)           | 9                       | 1889 | 38 (22-58)           | 80 (69-88)           |
| <b>Hb (<math>&lt; 10</math> g/dL)</b>                | 9                       | 1971 | 53 (42-63)           | 74 (65-81)           | 5                       | 916  | 65 (51-77)           | 71 (53-84)           |
| <b>Hb (<math>&lt; 8</math> g/dL)</b>                 | 9                       | 1971 | 14 (10-19)           | 95 (91-97)           | 5                       | 916  | 15 (9-25)            | 93 (86-96)           |
| <b>BMI (<math>&lt; 18.5</math> kg/m<sup>2</sup>)</b> | 18                      | 4969 | 34 (26-43)           | 84 (77-88)           | 12                      | 3098 | 42 (31-54)           | 80 (72-86)           |
| <b>Lymphadenopathy</b>                               | 4                       | 1003 | 31 (13-56)           | 89 (73-96)           | 3                       | 627  | 21 (11-35)           | 94 (87-97)           |
| <b>W4SS with CRP (<math>\geq 10</math> mg/L)¶</b>    | 5                       | 1597 | 92 (52-99)           | 23 (10-47)           | 4                       | 1460 | 97 (76-100)          | 24 (8-55)            |
| <b>W4SS with CXR (abnormal)¶</b>                     | 8                       | 2208 | 97 (92-99)           | 14 (7-25)            | 4                       | 1309 | 97 (88-99)           | 21 (11-36)           |
| <b>W4SS then CRP (<math>\geq 5</math> mg/L)¶</b>     | 5                       | 1597 | 80 (51-94)           | 66 (37-86)           | 4                       | 1460 | 95 (66-99)           | 69 (35-90)           |

\*Diagnostic accuracy estimates using culture or Xpert of sputum and/or other specimens as a reference standard

†Diagnostic accuracy estimates using only Xpert of sputum and/or other specimens as a reference standard

¶For parallel strategies, two screening tests are offered at the same time. For sequential strategies, a second screening test is offered only if the first screening test is positive

Definition of abbreviations: BMI = body mass index, CRP = C-reactive protein, CXR = chest X-ray, Hb = haemoglobin, W4SS = WHO four-symptom screen

Table S11E - Sensitivity analyses using different reference standards in participants with CD4 cell count >200 cells/ $\mu$ L

|                                                  | Sensitivity analyses 1* |      |                      |                      | Sensitivity analyses 2† |      |                      |                      |
|--------------------------------------------------|-------------------------|------|----------------------|----------------------|-------------------------|------|----------------------|----------------------|
|                                                  | No of studies           | N    | Sensitivity (95% CI) | Specificity (95% CI) | No of studies           | N    | Sensitivity (95% CI) | Specificity (95% CI) |
| <b>W4SS</b>                                      | 21                      | 9633 | 71 (58-81)           | 50 (36-63)           | 12                      | 5163 | 81 (63-91)           | 50 (33-67)           |
| <b>CRP (<math>\geq</math>10 mg/L)</b>            | 5                       | 1829 | 61 (45-75)           | 79 (68-87)           | 4                       | 1515 | 72 (45-89)           | 78 (62-88)           |
| <b>CRP (<math>\geq</math>8 mg/L)##</b>           | 5                       | 1829 | 64 (47-78)           | 76 (64-85)           | 4                       | 1515 | 78 (67-87)           | 74 (58-86)           |
| <b>CRP (<math>\geq</math>5 mg/L)</b>             | 5                       | 1829 | 75 (59-87)           | 65 (54-75)           | 4                       | 1515 | 86 (58-97)           | 64 (50-77)           |
| <b>CXR (abnormal)</b>                            | 8                       | 3909 | 66 (59-73)           | 65 (53-74)           | 4                       | 2784 | 73 (60-83)           | 67 (56-76)           |
| <b>CXR (suggests tuberculosis)</b>               | 8                       | 3932 | 60 (51-69)           | 81 (70-89)           | 3                       | 2498 | 66 (46-82)           | 86 (69-94)           |
| <b>Cough (any)</b>                               | 21                      | 9616 | 50 (41-60)           | 76 (68-82)           | 12                      | 5149 | 61 (48-71)           | 76 (67-83)           |
| <b>Cough (<math>\geq</math>2 weeks)</b>          | 17                      | 6416 | 34 (22-48)           | 87 (80-91)           | 9                       | 2415 | 38 (16-65)           | 88 (80-93)           |
| <b>Hb (&lt;10 g/dL)</b>                          | 9                       | 3048 | 27 (18-38)           | 84 (79-89)           | 5                       | 1112 | 38 (20-60)           | 82 (73-88)           |
| <b>Hb (&lt;8 g/dL)</b>                           | 9                       | 3048 | 6 (2-13)             | 97 (94-98)           | 5                       | 1112 | 7 (2-25)             | 95 (91-97)           |
| <b>BMI (&lt;18.5 kg/m<sup>2</sup>)</b>           | 18                      | 7396 | 20 (13-30)           | 92 (88-95)           | 12                      | 5063 | 32 (20-47)           | 91 (85-94)           |
| <b>Lymphadenopathy</b>                           | 4                       | 1374 | 31 (12-59)           | 91 (73-97)           | 3                       | 770  | 27 (12-49)           | 94 (77-99)           |
| <b>W4SS with CRP (<math>\geq</math>10 mg/L)¶</b> | 5                       | 1829 | 76 (47-92)           | 35 (15-61)           | 4                       | 1515 | 93 (4-100)           | 34 (12-66)           |
| <b>W4SS with CXR (abnormal)¶</b>                 | 8                       | 3903 | 91 (82-96)           | 28 (16-44)           | 4                       | 2778 | 93 (75-98)           | 35 (15-63)           |
| <b>W4SS then CRP (<math>\geq</math>5 mg/L)¶</b>  | 5                       | 1829 | 53 (12-90)           | 80 (62-91)           | 4                       | 1515 | 56 (5-97)            | 79 (55-92)           |

\*Diagnostic accuracy estimates using culture or Xpert of sputum and/or other specimens as a reference standard

†Diagnostic accuracy estimates using only Xpert of sputum and/or other specimens as a reference standard

##For sensitivity analyses 2, the bivariate model did not converge; results from model assuming no correlation between sensitivity and specificity

¶For parallel strategies, two screening tests are offered at the same time. For sequential strategies, a second screening test is offered only if the first screening test is positive

Definition of abbreviations: BMI = body mass index, CRP = C-reactive protein, CXR = chest X-ray, Hb = haemoglobin, W4SS = WHO four-symptom screen

Table S11F - Sensitivity analyses using different reference standards in pregnant participants§

|                                       | Sensitivity analyses 1* |      |                      |                      | Sensitivity analyses 2† |     |                      |                      |
|---------------------------------------|-------------------------|------|----------------------|----------------------|-------------------------|-----|----------------------|----------------------|
|                                       | No of studies           | N    | Sensitivity (95% CI) | Specificity (95% CI) | No of studies           | N   | Sensitivity (95% CI) | Specificity (95% CI) |
| <b>W4SS</b>                           | 8                       | 1935 | 77 (25-97)           | 58 (39-75)           | 5                       | 489 | 71 (10-98)           | 55 (31-77)           |
| <b>CRP (&gt;=10 mg/L)#</b>            | -                       | -    | -                    | -                    | -                       | -   | -                    | -                    |
| <b>CRP (&gt;=8 mg/L)#</b>             | -                       | -    | -                    | -                    | -                       | -   | -                    | -                    |
| <b>CRP (&gt;=5 mg/L)#</b>             | -                       | -    | -                    | -                    | -                       | -   | -                    | -                    |
| <b>CXR (abnormal)</b>                 | 1                       | 8    | 75 (11-99)           | 69 (91-33)           | 1                       | 8   | 75 (11-99)           | 69 (91-33)           |
| <b>CXR (suggests tuberculosis)</b>    | 1                       | 7    | 75 (11-99)           | 93 (100-42)          | 1                       | 7   | 75 (11-99)           | 93 (100-42)          |
| <b>Cough (any)</b>                    | 8                       | 1933 | 62 (24-89)           | 81 (70-88)           | 5                       | 487 | 53 (12-90)           | 81 (70-89)           |
| <b>Cough (&gt;=2 weeks)</b>           | 8                       | 1933 | 43 (17-74)           | 92 (86-95)           | 5                       | 488 | 17 (3-61)            | 92 (87-96)           |
| <b>Hb (&lt;10 g/dL)#</b>              | 5                       | 1350 | 20 (10-36)           | 75 (61-85)           | -                       | -   | -                    | -                    |
| <b>Hb (&lt;8 g/dL)#</b>               | 5                       | 1350 | 0 (0-100)            | 98 (97-99)           | -                       | -   | -                    | -                    |
| <b>BMI (&lt;18.5 kg/m²)##</b>         | 7                       | 472  | 0 (0-98)             | 96 (94-98)           | 5                       | 431 | 0 (0-100)            | 97 (94-98)           |
| <b>Lymphadenopathy#</b>               | -                       | -    | -                    | -                    | -                       | -   | -                    | -                    |
| <b>W4SS with CRP (&gt;=10 mg/L)¶#</b> | -                       | -    | -                    | -                    | -                       | -   | -                    | -                    |
| <b>W4SS with CXR (abnormal)¶¶</b>     | 1                       | 8    | 75 (11-99)           | 56 (84-24)           | 1                       | 8   | 75 (11-99)           | 56 (84-24)           |
| <b>W4SS then CRP (&gt;=5 mg/L)¶¶#</b> | -                       | -    | -                    | -                    | -                       | -   | -                    | -                    |

§For some analyses, all studies had 0% or 100% sensitivity/specificity; therefore, models may have given unreliable estimates such as 95% CIs that range from 0 to 100

\*Diagnostic accuracy estimates using culture or Xpert of sputum and/or other specimens as a reference standard

†Diagnostic accuracy estimates using only Xpert of sputum and/or other specimens as a reference standard

#Insufficient data to perform meta-analysis

##Bivariate model did not converge; results from model assuming no correlation between sensitivity and specificity

¶¶For parallel strategies, two screening tests are offered at the same time. For sequential strategies, a second screening test is offered only if the first screening test is positive

Definition of abbreviations: BMI = body mass index, CRP = C-reactive protein, CXR = chest X-ray, Hb = haemoglobin, W4SS = WHO four-symptom screen

**Table S12 - Sensitivity analyses comparing W4SS followed by Xpert with CRP ( $\geq 10$ mg) followed by Xpert in all participants and by subgroups†**

| Subgroup                                                | Sensitivity analyses             |      |                      |                      |                 |      |                      |                      | Number of Xpert tests per 1000 PLHIV* |     |               |     |                |     |                |     |
|---------------------------------------------------------|----------------------------------|------|----------------------|----------------------|-----------------|------|----------------------|----------------------|---------------------------------------|-----|---------------|-----|----------------|-----|----------------|-----|
|                                                         | CRP ( $\geq 10$ mg/L) then Xpert |      |                      |                      | W4SS then Xpert |      |                      |                      | 1% prevalence                         |     | 5% prevalence |     | 10% prevalence |     | 20% prevalence |     |
|                                                         | No of studies                    | N    | Sensitivity (95% CI) | Specificity (95% CI) | No of studies   | N    | Sensitivity (95% CI) | Specificity (95% CI) | W4SS                                  | CRP | W4SS          | CRP | W4SS           | CRP | W4SS           | CRP |
| <b>All participants</b>                                 | 4                                | 3099 | 54 (45-63)           | 100 (99-100)         | 4               | 3099 | 50 (28-71)           | 100 (98-100)         | 612                                   | 265 | 620           | 286 | 631            | 311 | 652            | 362 |
| <b>Outpatients (Not on ART)</b>                         | 4                                | 2718 | 56 (51-60)           | 99 (99-100)          | 4               | 2718 | 59 (51-66)           | 99 (99-100)          | 732                                   | 345 | 738           | 365 | 747            | 390 | 764            | 440 |
| <b>Outpatients (On ART)</b>                             | 1                                | 378  | 8 (1-62)             | 100 (100-98)         | 1               | 378  | 8 (1-62)             | 100 (100-98)         | 120                                   | 101 | 118           | 105 | 116            | 110 | 112            | 120 |
| <b>CD4 &gt;200 cells/<math>\mu</math>L</b>              | 4                                | 1508 | 43 (34-53)           | 100 (7-100)          | 4               | 1508 | 44 (32-58)           | 100 (99-100)         | 572                                   | 214 | 578           | 230 | 585            | 251 | 600            | 292 |
| <b>CD4 <math>\leq</math>200 cells/<math>\mu</math>L</b> | 4                                | 1456 | 61 (51-71)           | 99 (98-100)          | 4               | 1456 | 63 (53-71)           | 99 (98-99)           | 682                                   | 365 | 689           | 386 | 698            | 411 | 716            | 462 |
| <b>Pregnant participants#</b>                           | -                                | -    | -                    | -                    | -               | -    | -                    | -                    | -                                     | -   | -             | -   | -              | -   | -              | -   |

†Using culture as a reference standard; accuracy measures for entire algorithm using total Xpert (sputum and/or non-sputum Xpert result)

\*Calculated using direct comparison estimates

#Insufficient data to perform meta-analysis

Definition of abbreviations: ART = antiretroviral therapy, CRP = C-reactive protein, PLHIV = people living with HIV, W4SS = WHO four-symptom screen

**Figure S1 - Risk of bias and applicability results on the QUADAS-2 criteria tool**

Figure S1A - Risk of bias and applicability results on the QUADAS-2 criteria tool by study†

|            |                       | Risk of bias domains |    |    |    |    |    |    |
|------------|-----------------------|----------------------|----|----|----|----|----|----|
|            |                       | D1                   | D2 | D3 | D4 | D5 | D6 | D7 |
| Study      | Abed Al-Darraji, 2013 | +                    | +  | +  | +  | +  | +  | +  |
|            | Affolabi, 2018        | +                    | +  | +  | +  | +  | +  | +  |
|            | Ahmad, 2014           | +                    | +  | +  | +  | +  | +  | +  |
|            | Balcha, 2014          | +                    | +  | +  | +  | ×  | +  | +  |
|            | Bjerrum, 2015         | +                    | +  | +  | +  | ×  | +  | +  |
|            | Gersh, 2018           | +                    | +  | +  | +  | +  | +  | +  |
|            | Hanifa, 2012          | +                    | +  | +  | +  | ×  | +  | +  |
|            | Hoffmann, 2013        | +                    | +  | +  | +  | ×  | +  | +  |
|            | Kempker, 2019         | +                    | +  | +  | +  | +  | +  | +  |
|            | Kerkhoff, 2013        | +                    | +  | +  | +  | +  | +  | +  |
|            | Kufa, 2012            | +                    | +  | +  | +  | +  | +  | +  |
|            | LaCourse, 2016        | +                    | +  | +  | +  | ×  | +  | +  |
|            | Mbu, 2018             | +                    | +  | +  | +  | +  | +  | +  |
|            | Modi, 2016¶           | +                    | +  | +  | +  | +  | +  | +  |
|            | Nguyen, 2016          | +                    | +  | +  | +  | +  | +  | +  |
|            | Rangaka, 2012         | +                    | +  | +  | ×  | +  | +  | +  |
|            | Reeve, unpublished    | +                    | +  | +  | +  | +  | +  | +  |
|            | Shapiro, 2018         | +                    | +  | +  | +  | +  | +  | +  |
|            | Swindells, 2013       | +                    | +  | +  | +  | +  | +  | +  |
|            | Thit, 2017§           | +                    | +  | +  | +  | +  | +  | +  |
| Yoon, 2018 | +                     | +                    | +  | +  | ×  | +  | +  |    |

D1: Patient selection (Risk of Bias)  
 D2: Index test (Risk of Bias)  
 D3: Reference test (Risk of Bias)  
 D4: Flow and timing (Risk of Bias)  
 D5: Patient selection (Applicability)  
 D6: Index test (Applicability)  
 D7: Reference test (Applicability)

†In general, domains were assessed for all participants. Green = low risk of bias, red = high risk of bias

¶For the domain D4 (flow and timing), the risk of bias was judged high for chest X-ray as the index test (>20% missing data).

§For the domain D4 (flow and timing), the risk of bias was judged high for haemoglobin as the index test (>20% missing data).

Figure S1B - Clustered bar graphs of risk of bias and applicability results on the QUADAS-2 criteria tool

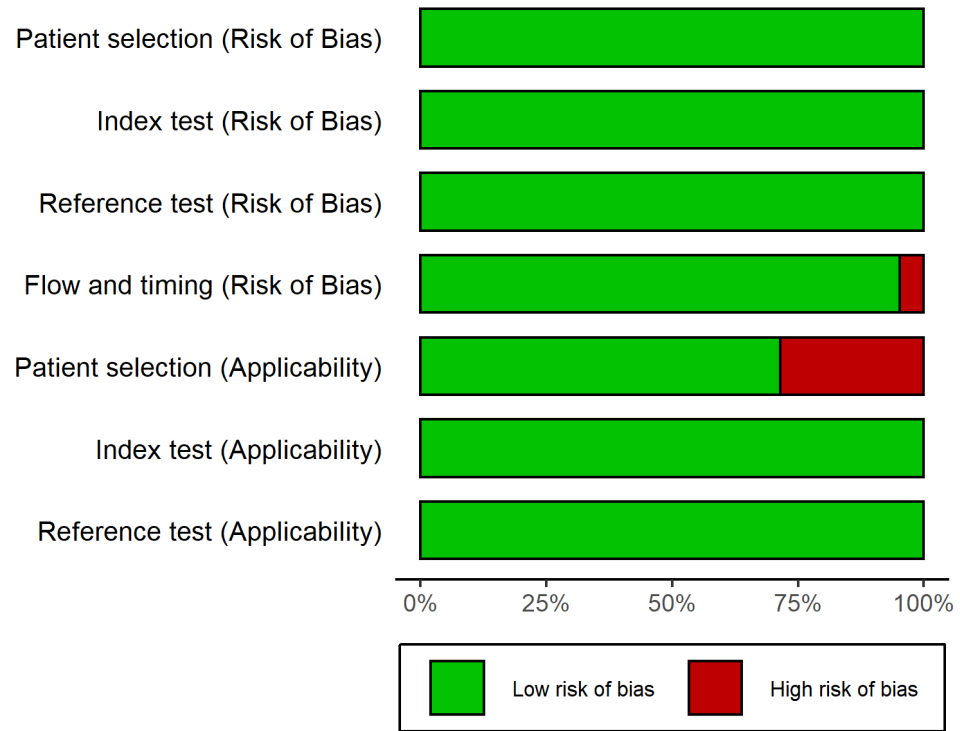



**Figure S2 - Plots of sensitivity and specificity for each screening test for the detection of tuberculosis**

Figure S2A - Plots of sensitivity and specificity for each screening test for the detection of tuberculosis in all participants†

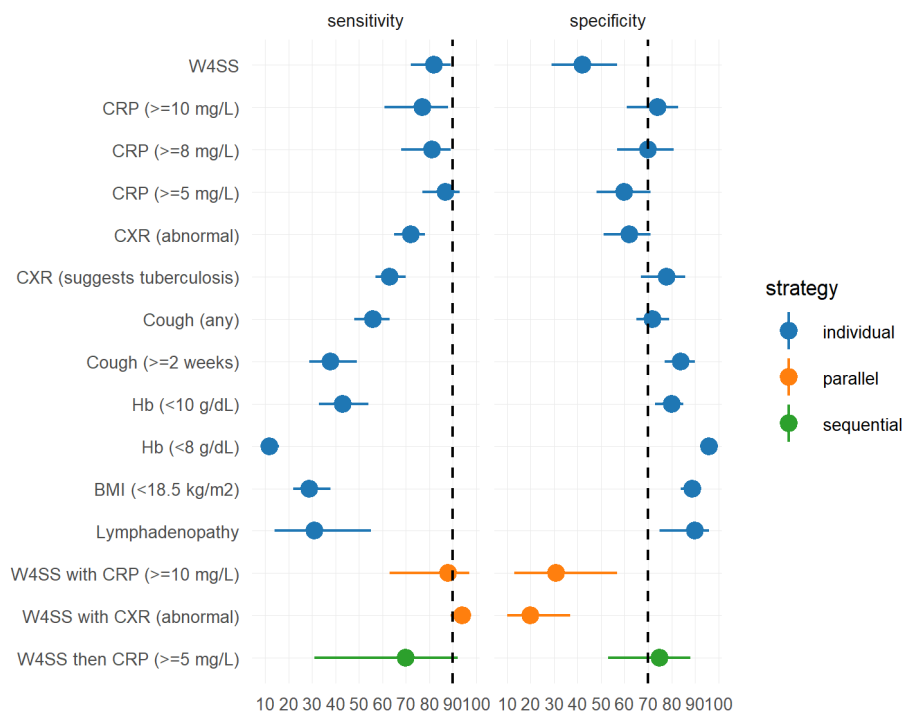

†Dashed lines indicate WHO's minimum requirements for a tuberculosis screening test (90% sensitivity and 70% specificity)

Definition of abbreviations: BMI = body mass index, CRP = C-reactive protein, CXR = chest X-ray, Hb = haemoglobin, W4SS = WHO four-symptom screen

Figure S2B - Plots of sensitivity and specificity for each screening test for the detection of tuberculosis in outpatients (on ART)†

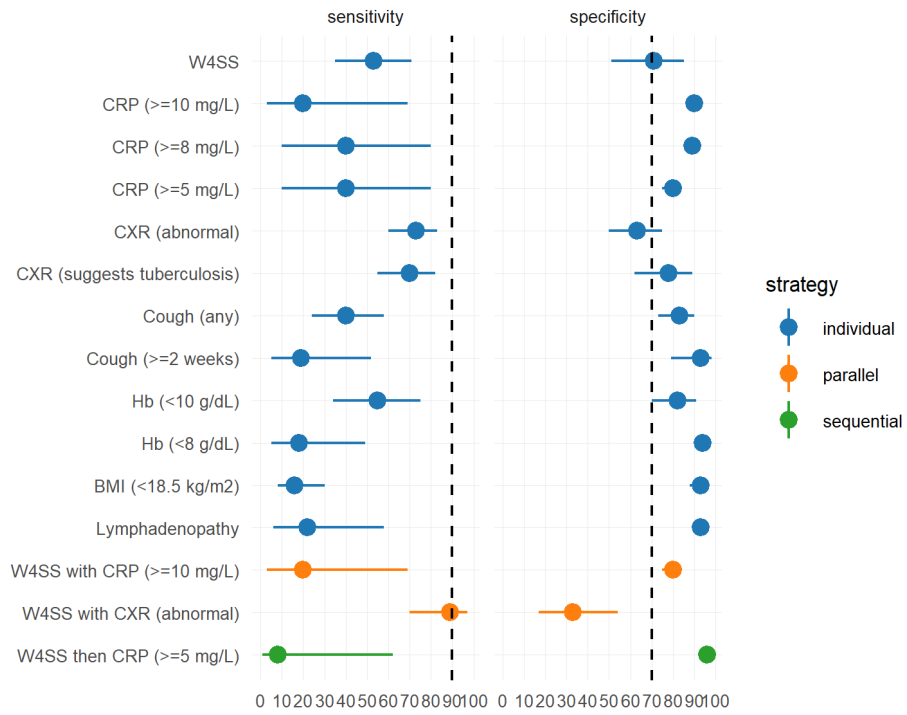

†Dashed lines indicate WHO's minimum requirements for a tuberculosis screening test (90% sensitivity and 70% specificity)

Definition of abbreviations: ART = antiretroviral therapy, BMI = body mass index, CRP = C-reactive protein, CXR = chest X-ray, Hb = haemoglobin, W4SS = WHO four-symptom screen

Figure S2C - Plots of sensitivity and specificity for each screening test for the detection of tuberculosis in outpatients (not on ART)†

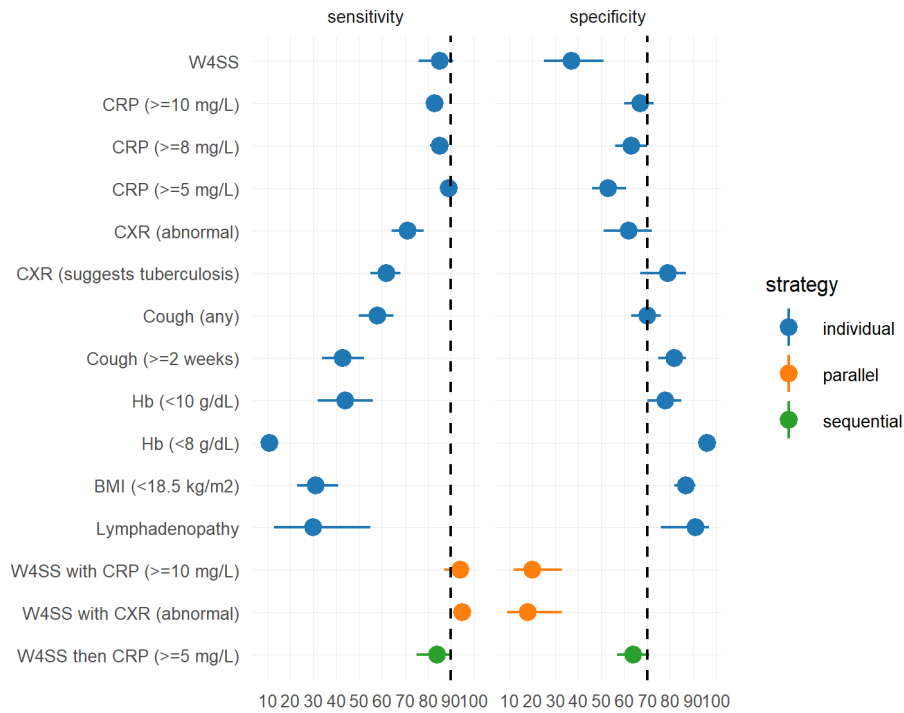

†Dashed lines indicate WHO's minimum requirements for a tuberculosis screening test (90% sensitivity and 70% specificity)

Definition of abbreviations: ART = antiretroviral therapy, BMI = body mass index, CRP = C-reactive protein, CXR = chest X-ray, Hb = haemoglobin, W4SS = WHO four-symptom screen

Figure S2D - Plots of sensitivity and specificity for each screening test for the detection of tuberculosis in participants with CD4 cell count  $\leq 200$  cells/ $\mu\text{L}$ †

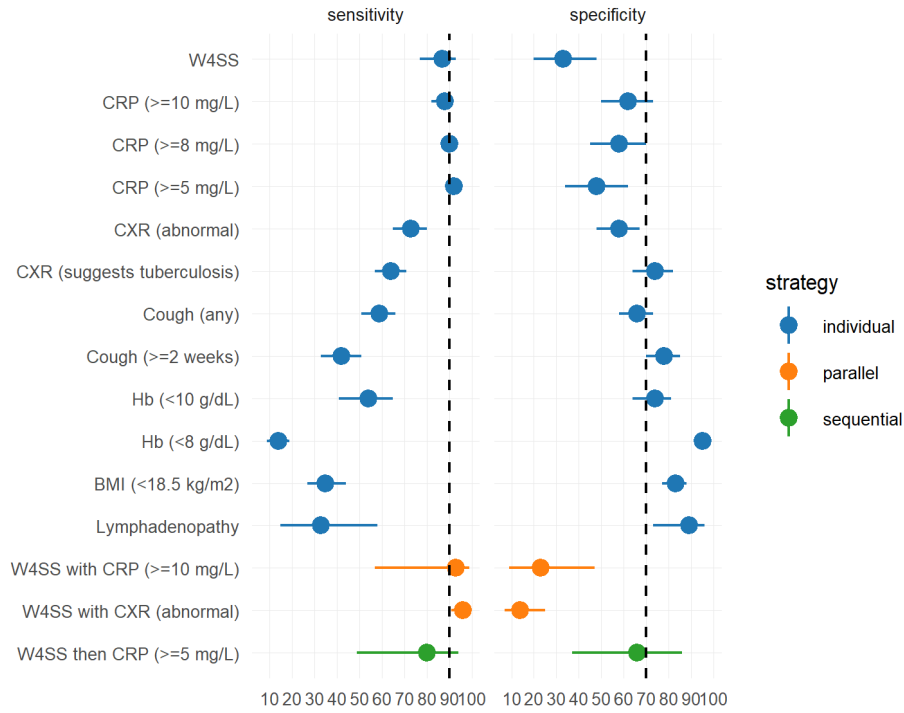

†Dashed lines indicate WHO's minimum requirements for a tuberculosis screening test (90% sensitivity and 70% specificity)

Definition of abbreviations: BMI = body mass index, CRP = C-reactive protein, CXR = chest X-ray, Hb = haemoglobin, W4SS = WHO four-symptom screen

Figure S2E - Plots of sensitivity and specificity for each screening test for the detection of tuberculosis in participants with CD4 cell count >200 cells/ $\mu$ L†

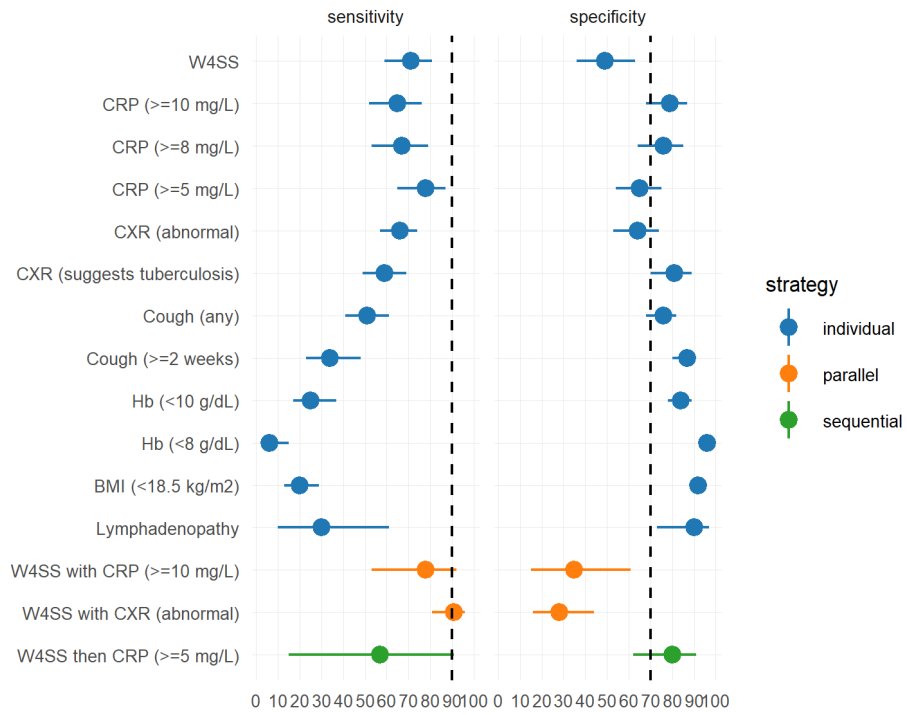

†Dashed lines indicate WHO's minimum requirements for a tuberculosis screening test (90% sensitivity and 70% specificity)  
 Definition of abbreviations: BMI = body mass index, CRP = C-reactive protein, CXR = chest X-ray, Hb = haemoglobin, W4SS = WHO four-symptom screen

Figure S2F - Plots of sensitivity and specificity for each screening test for the detection of tuberculosis in in pregnant participants†\*

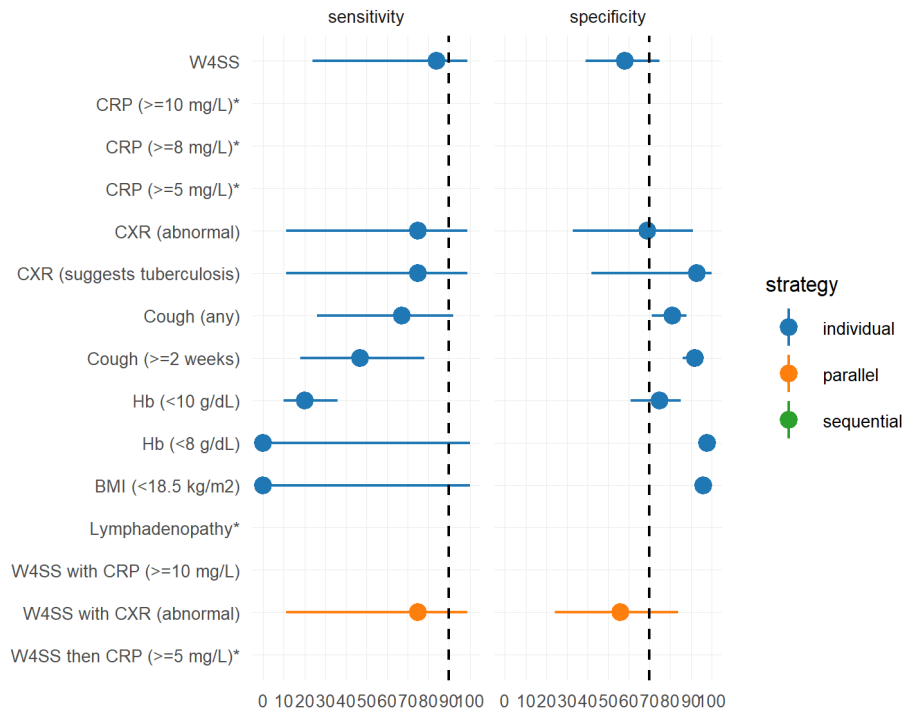

†Dashed lines indicate WHO's minimum requirements for a tuberculosis screening test (90% sensitivity and 70% specificity)

\*Insufficient data to perform meta-analysis

Definition of abbreviations: BMI = body mass index, CRP = C-reactive protein, CXR = chest X-ray, Hb = haemoglobin, W4SS = WHO four-symptom screen

**Figure S3 - Forest plots of sensitivity and specificity estimates in all participants and subgroups**

Figure S3A - Forest plots of sensitivity and specificity estimates in all participants  
 All - Forest plot for  
 W4SS

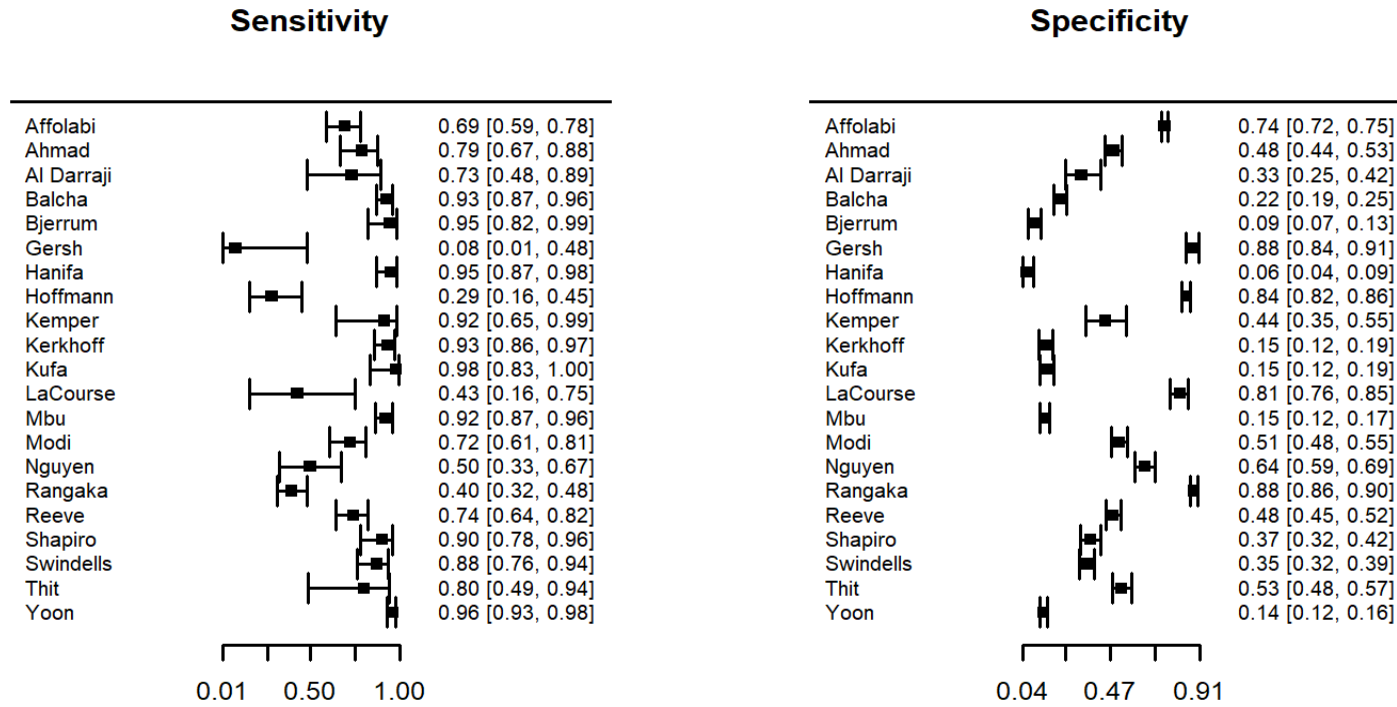

All - Forest plot for  
 Top: CRP ( $\geq 10$  mg/L) and Bottom: CRP ( $\geq 5$  mg/L)

**Sensitivity**

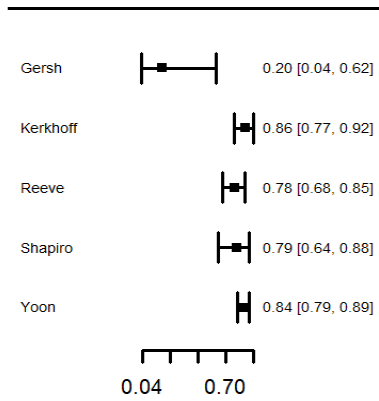

**Specificity**

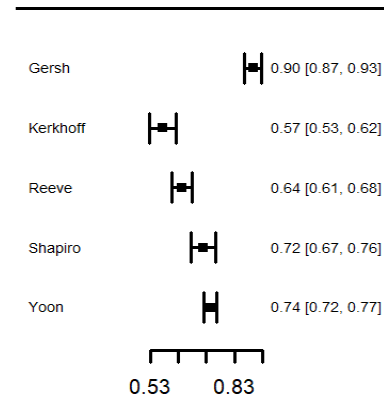

**Sensitivity**

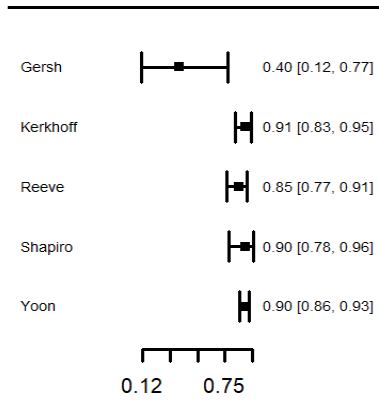

**Specificity**

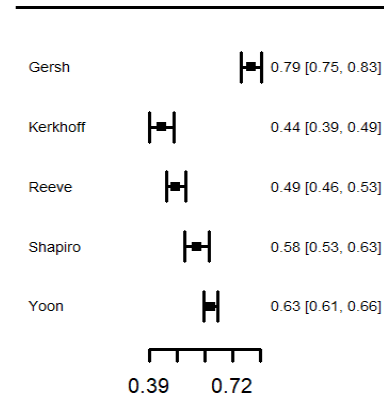



All - Forest plot for  
 Top: CXR (abnormal) and Bottom: CXR (suggests tuberculosis)

**Sensitivity**

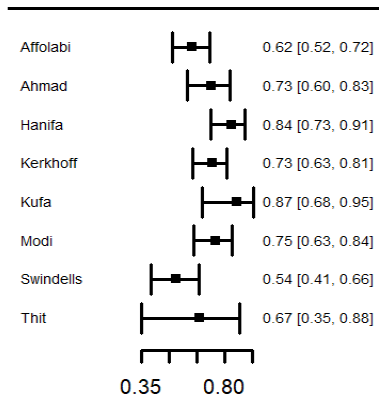

**Specificity**

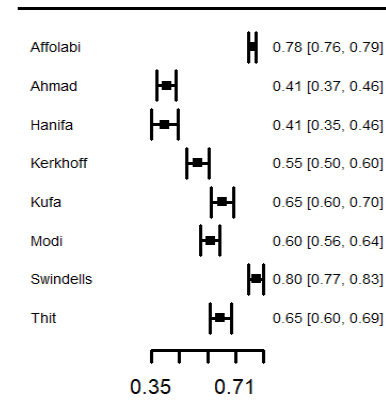

**Sensitivity**

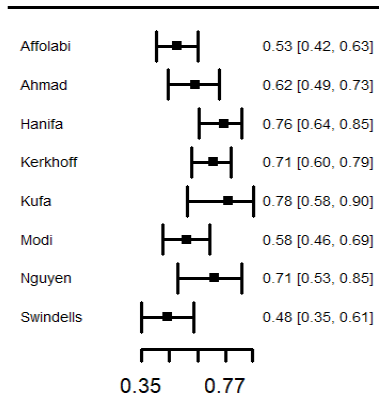

**Specificity**

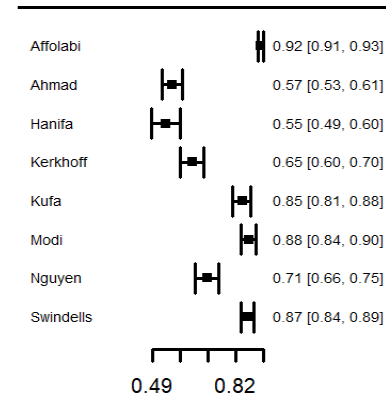

All - Forest plot for  
 Top: Cough (any) and Bottom: Cough ( $\geq 2$  weeks)

Sensitivity

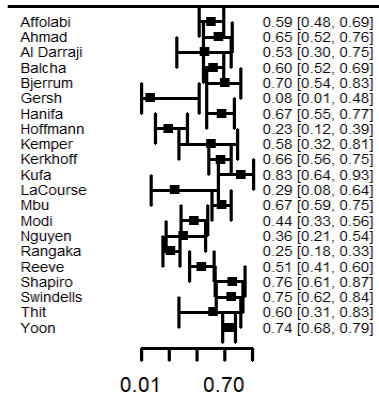

Specificity

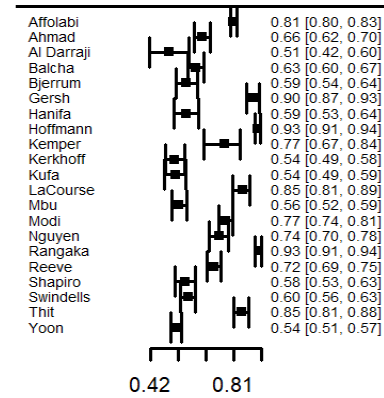

Sensitivity

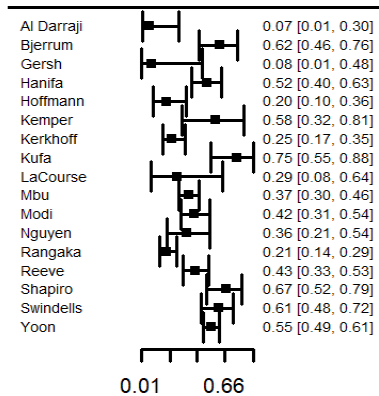

Specificity

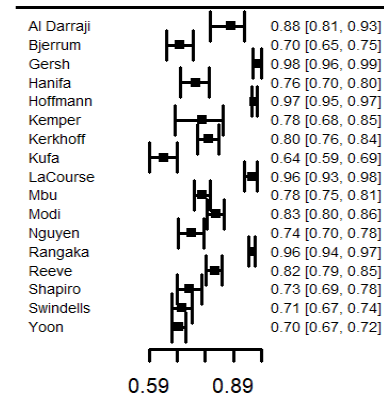

All - Forest plot for  
 Top: Hb (<10 g/dL) and Bottom: Hb (<8 g/dL)

**Sensitivity**

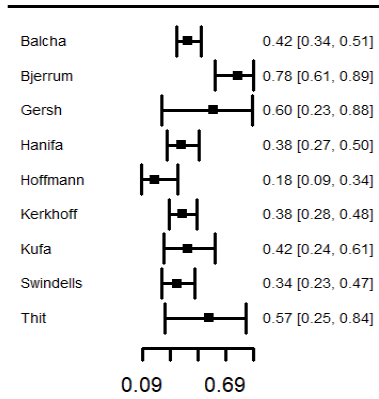

**Specificity**

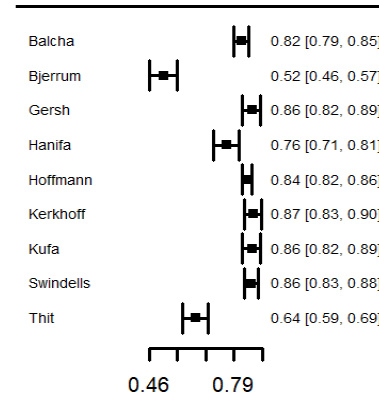

**Sensitivity**

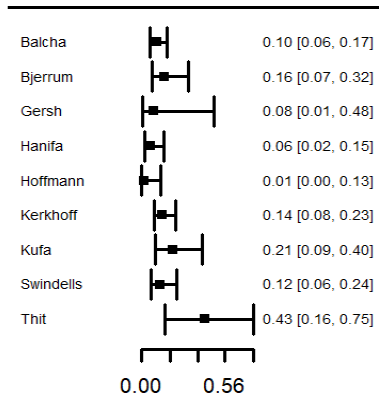

**Specificity**

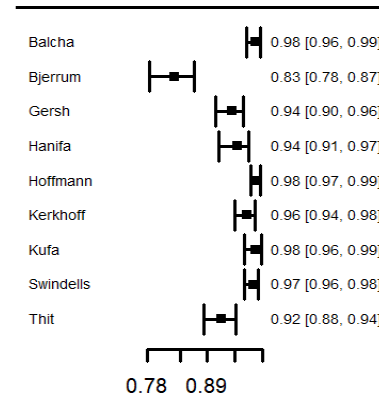

All - Forest plot for  
BMI (<18.5 kg/m<sup>2</sup>)

**Sensitivity**

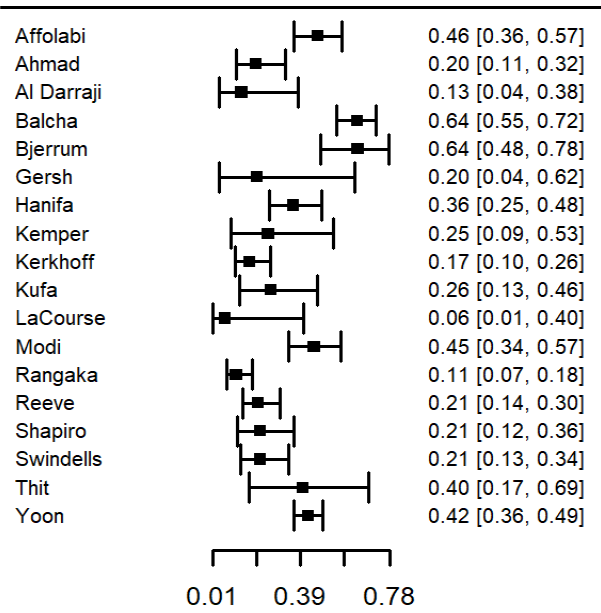

**Specificity**

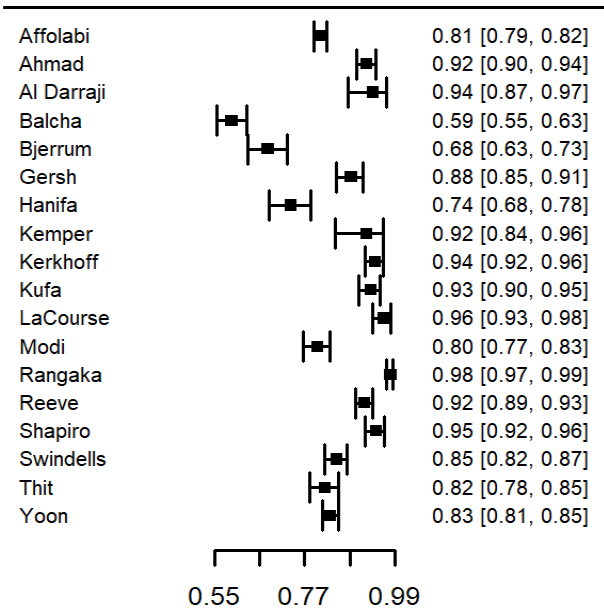

All - Forest plot for Lymphadenopathy

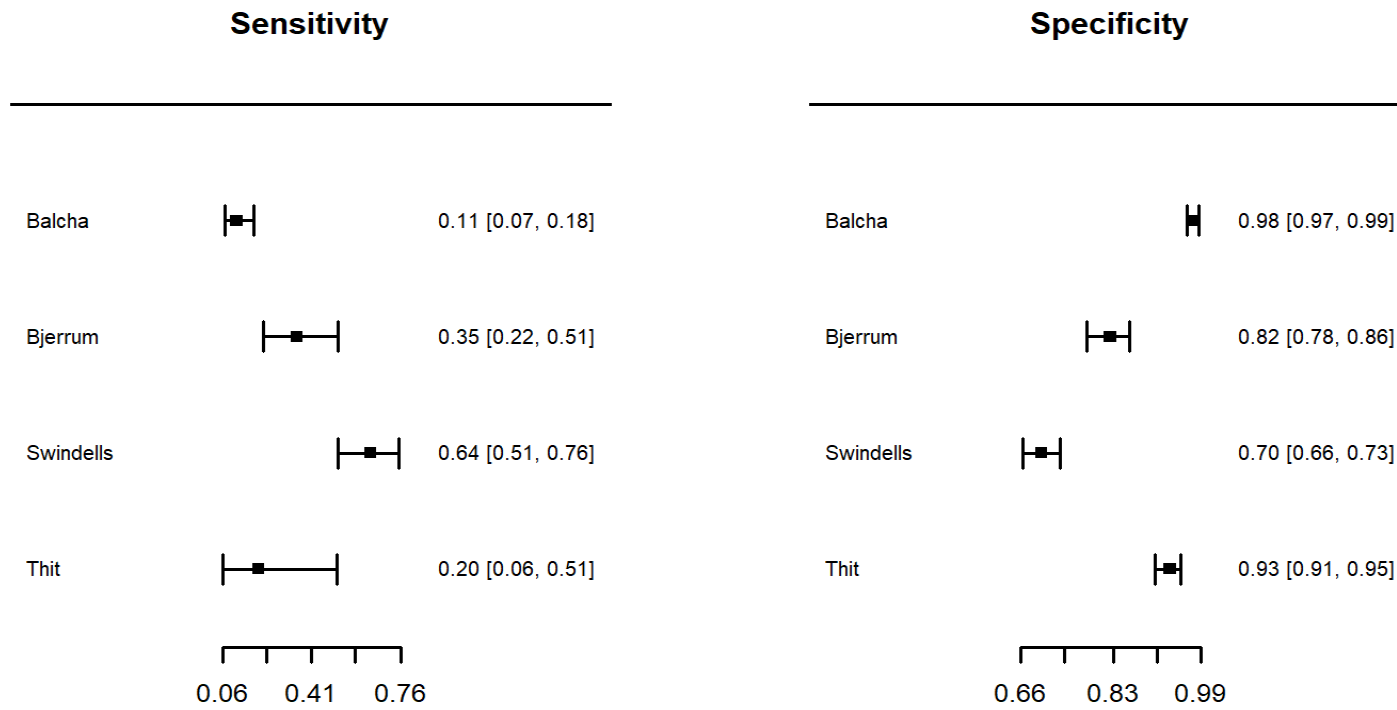

All - Forest plot for  
 Top: W4SS with CRP ( $\geq 10$  mg/L) and Bottom: W4SS then CRP ( $\geq 5$  mg/L)

**Sensitivity**

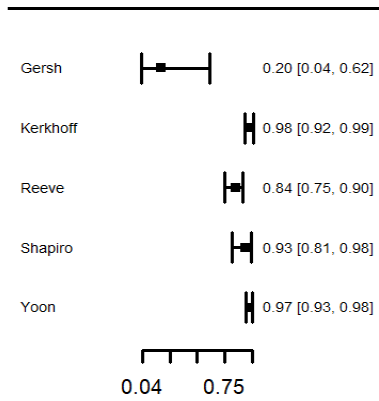

**Specificity**

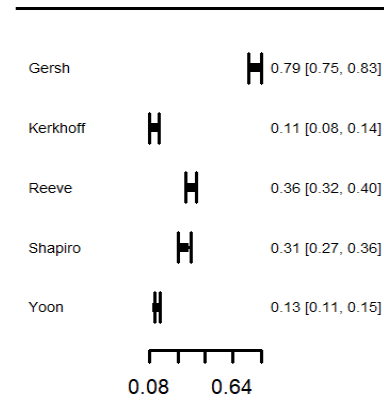

**Sensitivity**

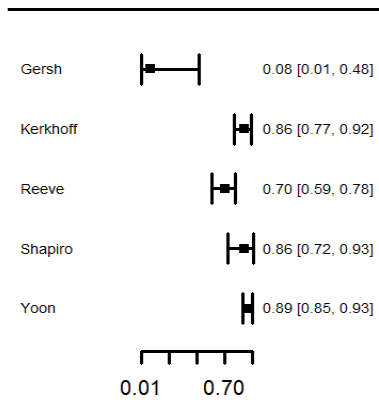

**Specificity**

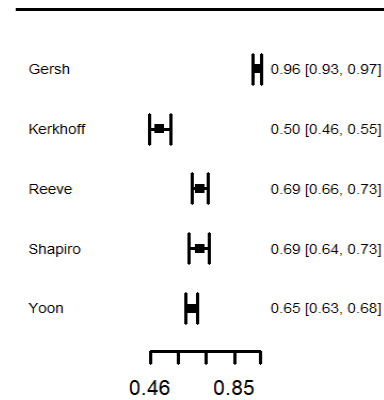

All - Forest plot for  
W4SS with CXR (abnormal)

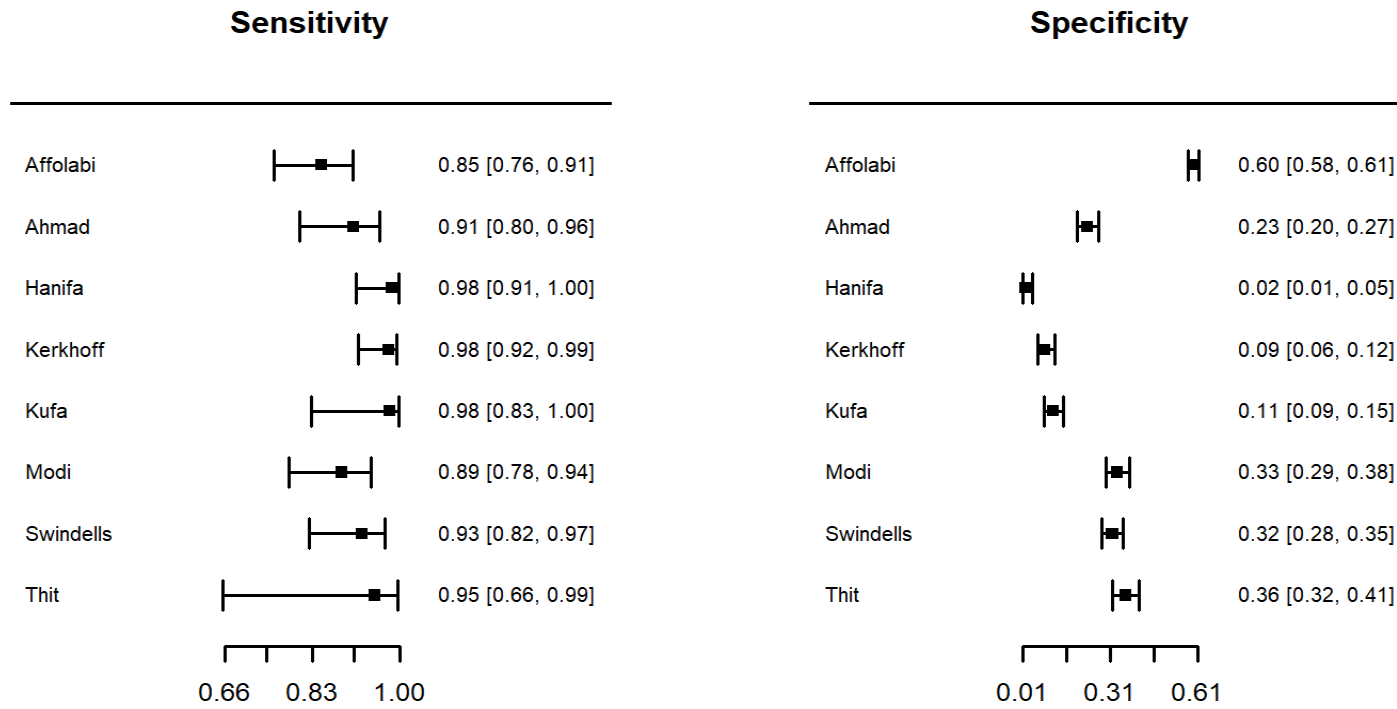

All - Forest plot for  
Top: W4SS then Xpert and Bottom: Xpert alone

**Sensitivity**

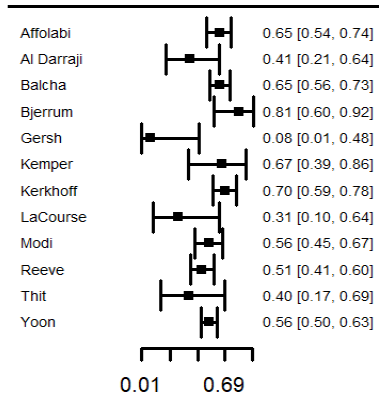

**Specificity**

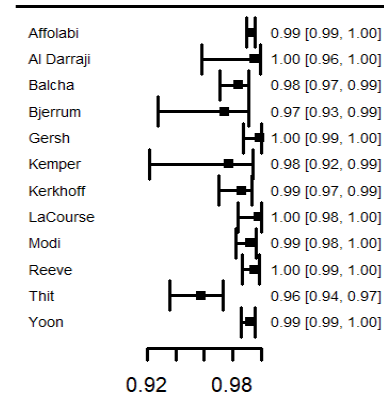

**Sensitivity**

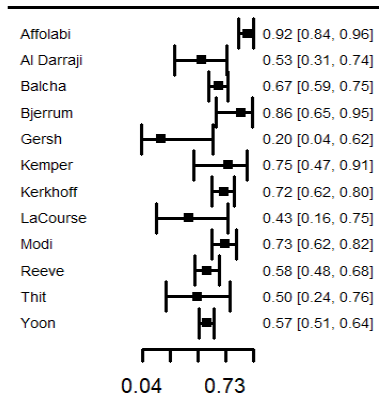

**Specificity**

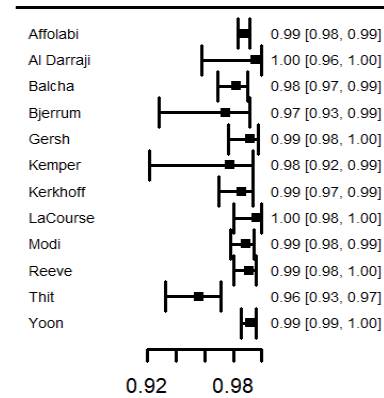



Figure S3B - Forest plots of sensitivity and specificity estimates in outpatients (on ART)  
 Outpatients (On ART) - Forest plot for W4SS

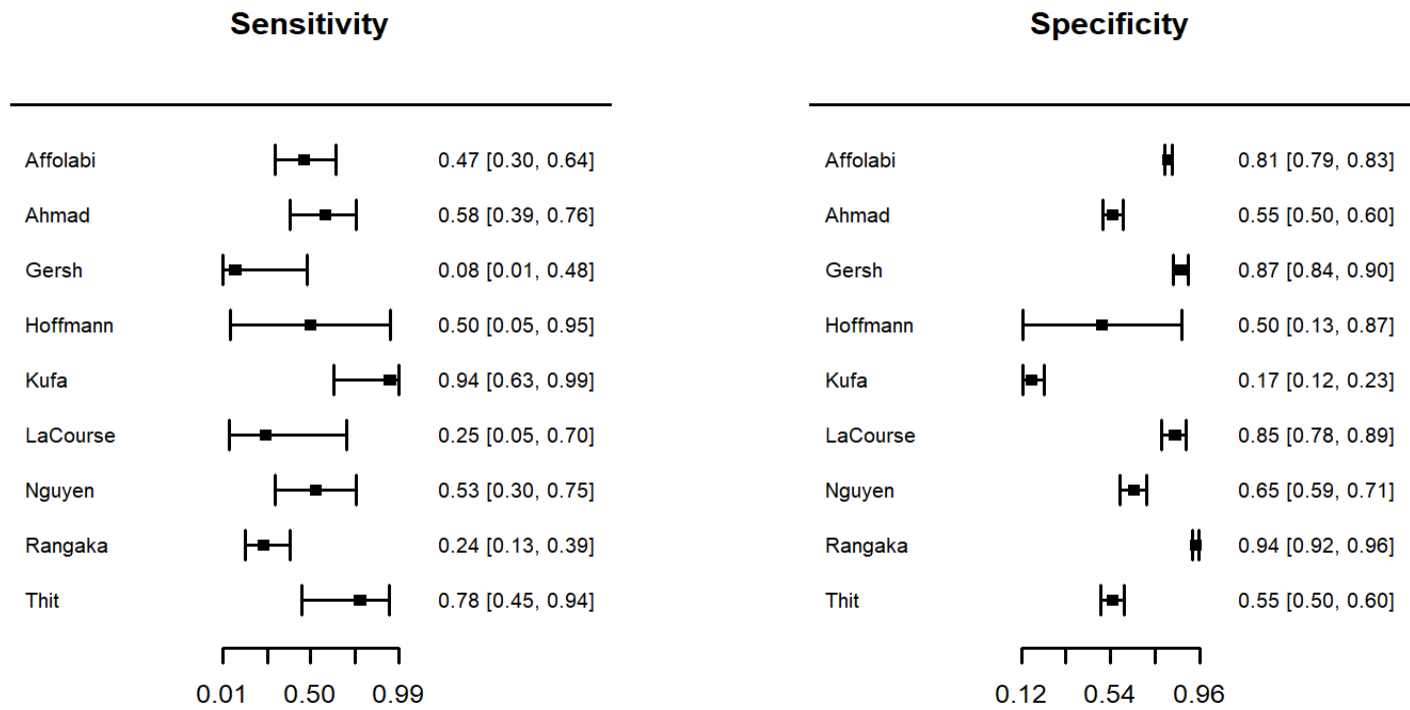

Outpatients (On ART) - Forest plot for  
Top: CRP ( $\geq 10$  mg/L) and Bottom: CRP ( $\geq 5$  mg/L)

**Sensitivity**

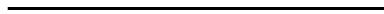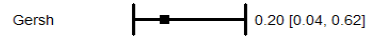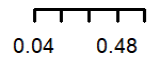

**Specificity**

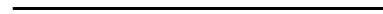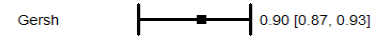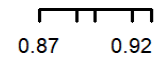

**Sensitivity**

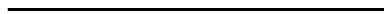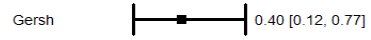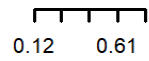

**Specificity**

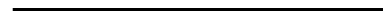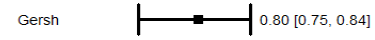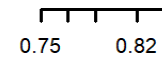

Outpatients (On ART) - Forest plot for  
 Top: CXR (abnormal) and Bottom: CXR (suggests tuberculosis)

**Sensitivity**

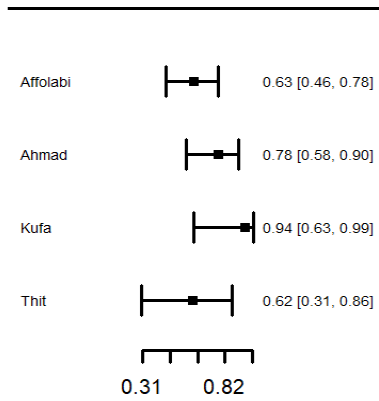

**Specificity**

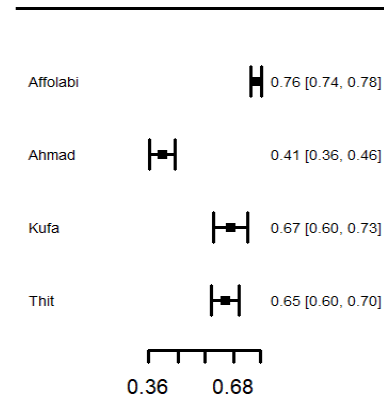

**Sensitivity**

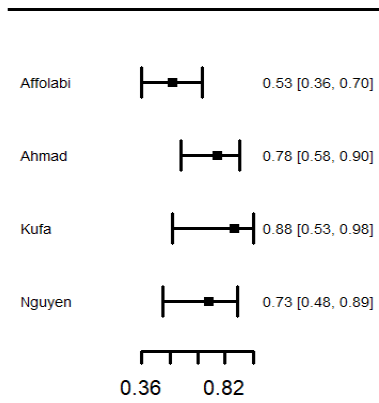

**Specificity**

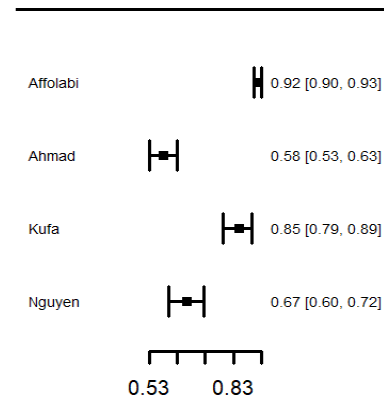

Outpatients (On ART) - Forest plot for  
 Top: Cough (any) and Bottom: Cough (>=2 weeks)

**Sensitivity**

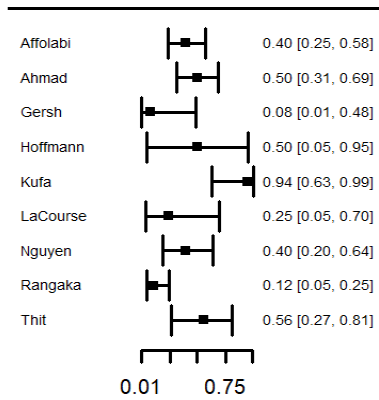

**Specificity**

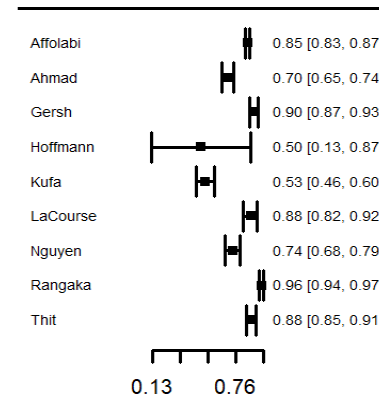

**Sensitivity**

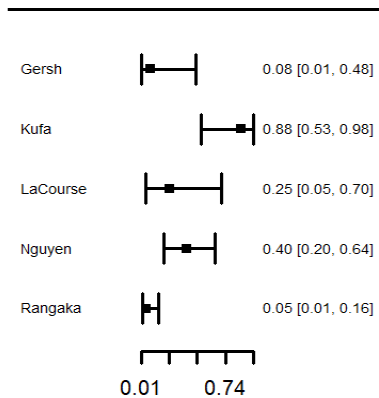

**Specificity**

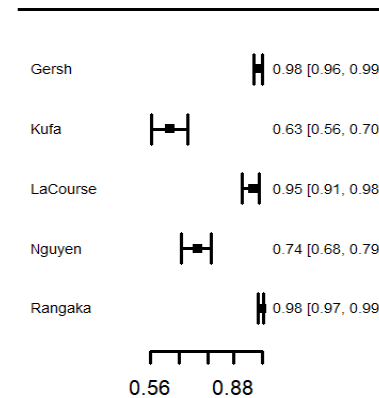

Outpatients (On ART) - Forest plot for  
 Top: Hb (<10 g/dL) and Bottom: Hb (<8 g/dL)

**Sensitivity**

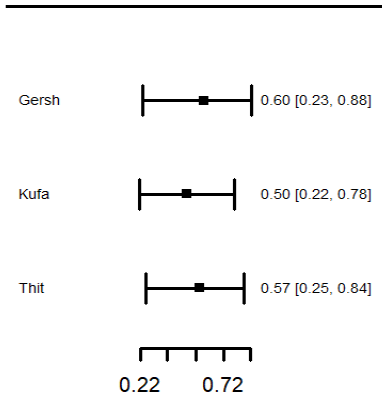

**Specificity**

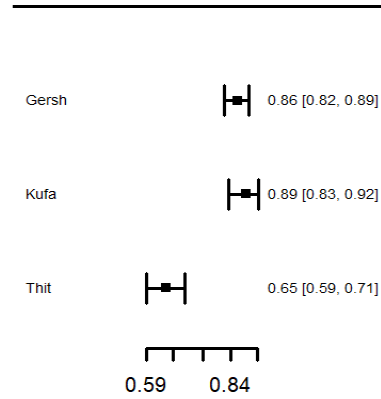

**Sensitivity**

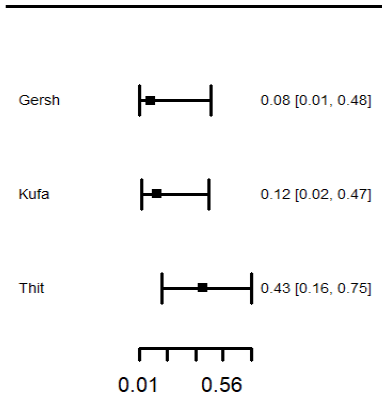

**Specificity**

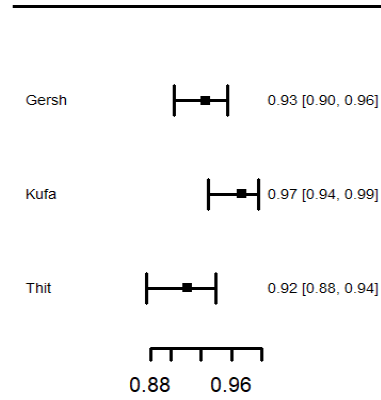

Outpatients (On ART) - Forest plot for  
BMI (<18.5 kg/m<sup>2</sup>)

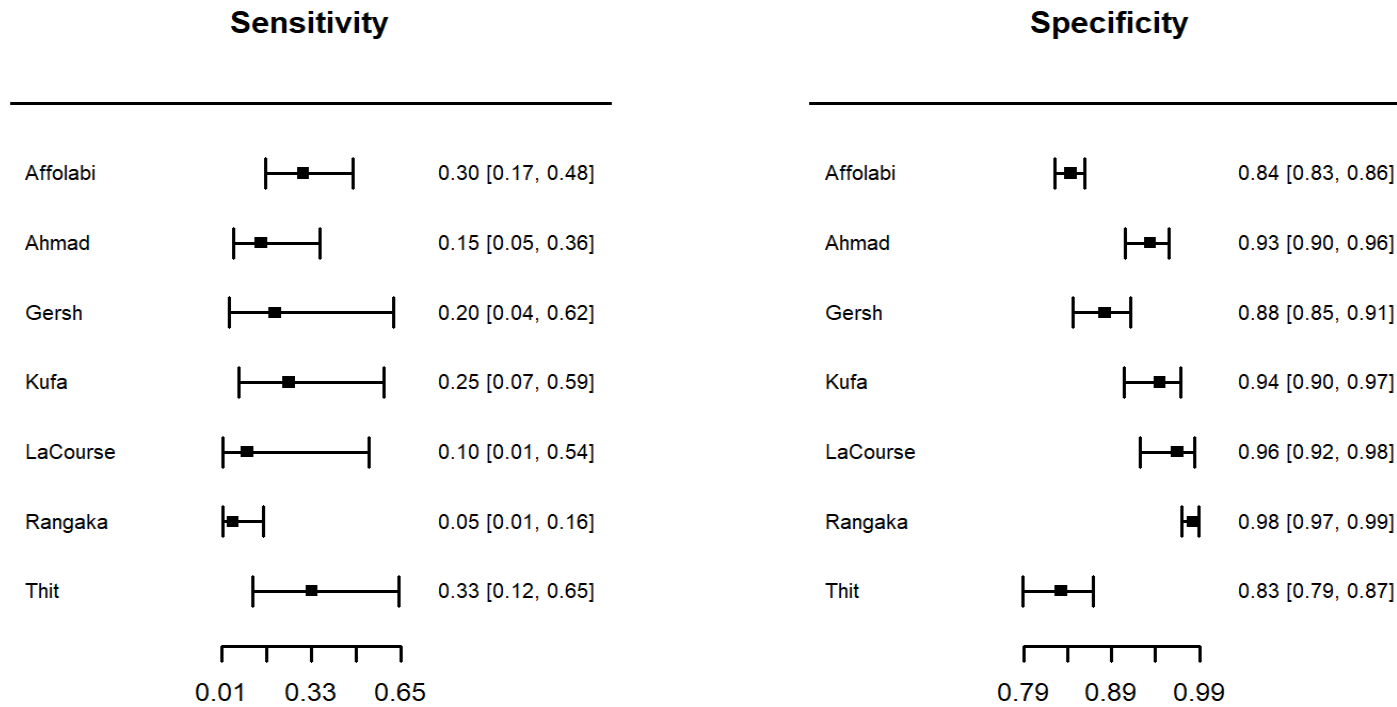

Outpatients (On ART) - Forest plot for Lymphadenopathy

**Sensitivity**

**Specificity**

Thit 0.22 [0.06, 0.55]

Thit 0.93 [0.89, 0.95]

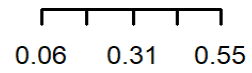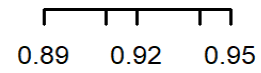

Outpatients (On ART) - Forest plot for  
Top: W4SS with CRP ( $\geq 10$  mg/L) and Bottom: W4SS then CRP ( $\geq 5$  mg/L)

**Sensitivity**

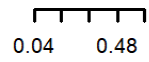

**Specificity**

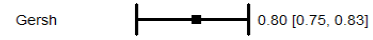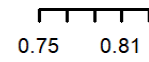

**Sensitivity**

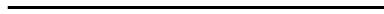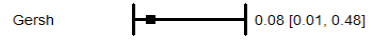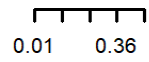

**Specificity**

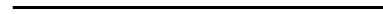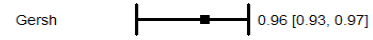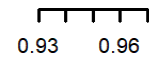



Outpatients (On ART) - Forest plot for  
W4SS with CXR (abnormal)

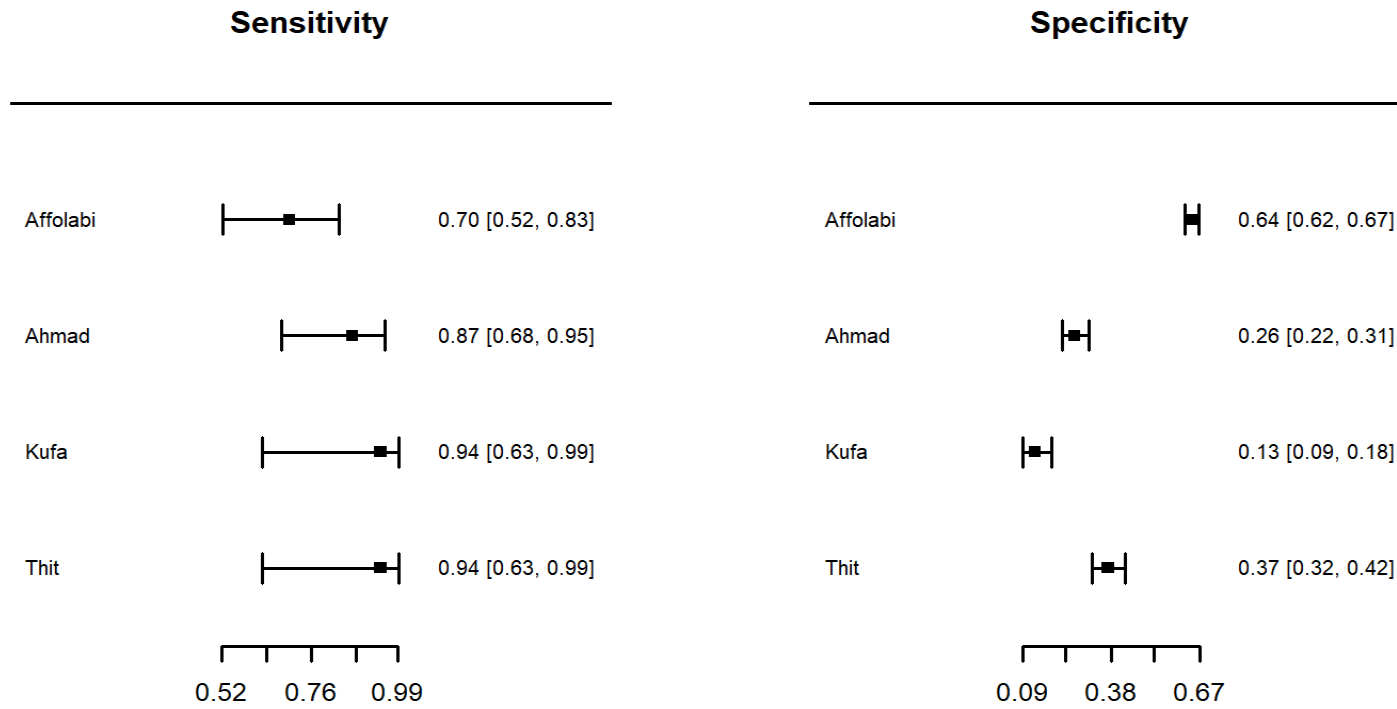

Outpatients (On ART) - Forest plot for  
 Top: W4SS then Xpert and Bottom: Xpert alone

**Sensitivity**

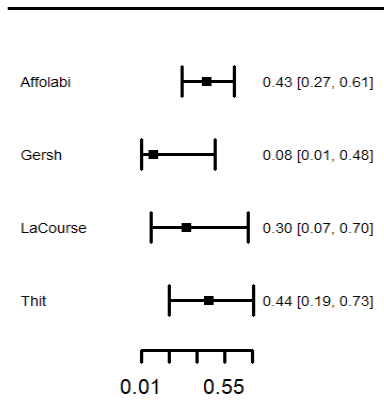

**Specificity**

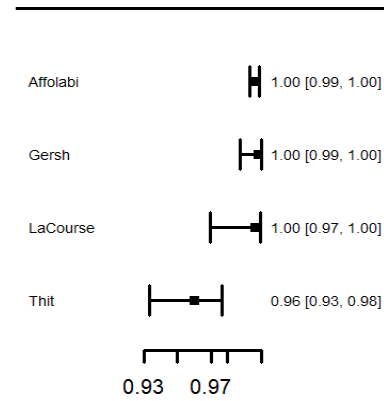

**Sensitivity**

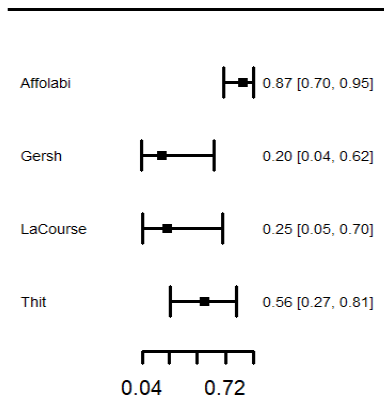

**Specificity**

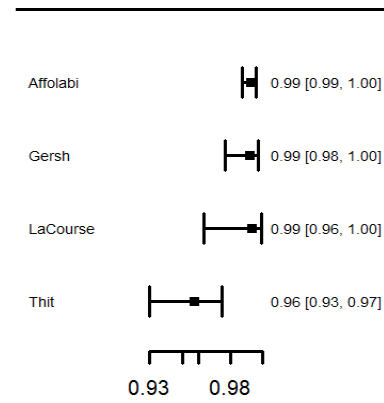

Figure S3C - Forest plots of sensitivity and specificity estimates in outpatients (not on ART)  
 Outpatients (Not on ART) - Forest plot for W4SS

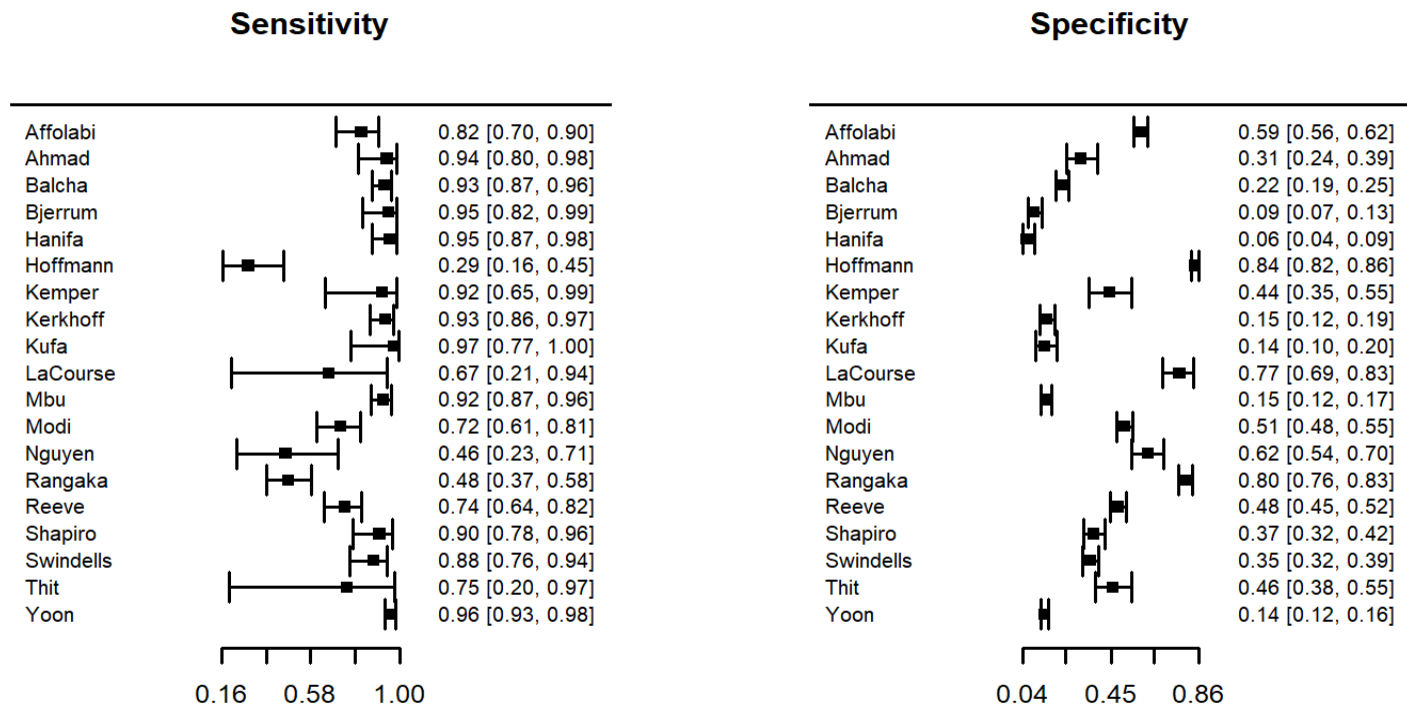

Outpatients (Not on ART) - Forest plot for  
 Top: CRP ( $\geq 10$  mg/L) and Bottom: CRP ( $\geq 5$  mg/L)

**Sensitivity**

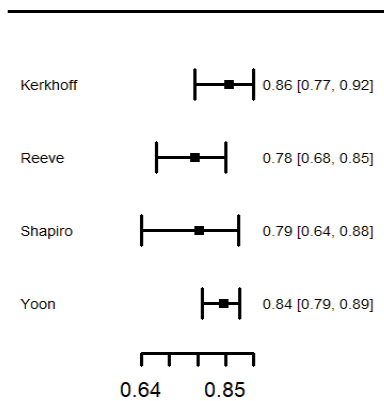

**Specificity**

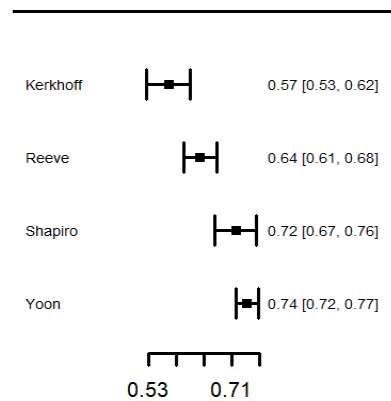

**Sensitivity**

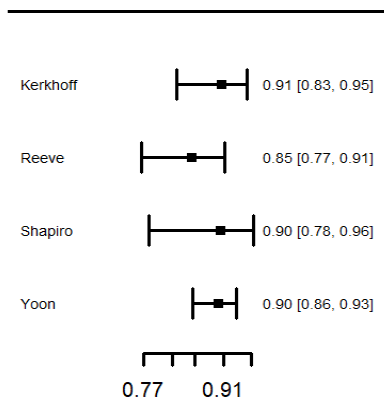

**Specificity**

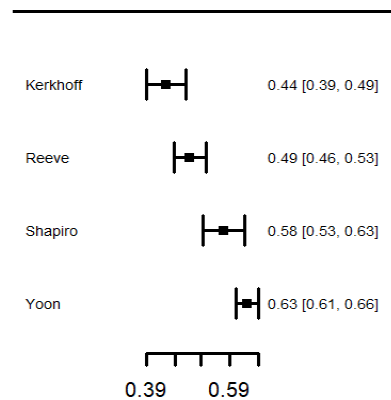

Outpatients (Not on ART) - Forest plot for  
 Top: CXR (abnormal) and Bottom: CXR (suggests tuberculosis)

**Sensitivity**

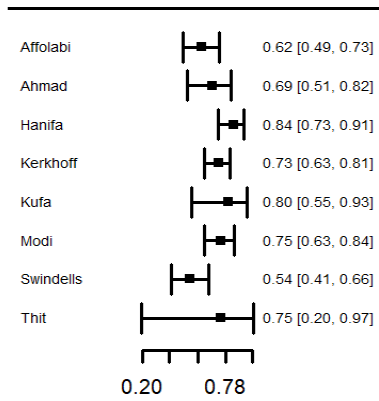

**Specificity**

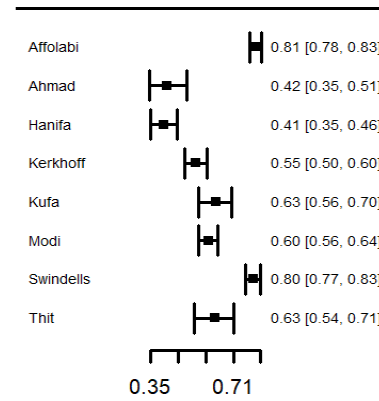

**Sensitivity**

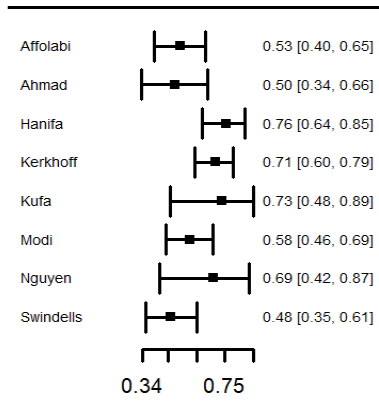

**Specificity**

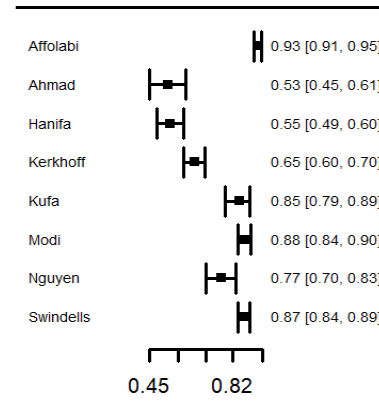

Outpatients (Not on ART) - Forest plot for  
 Top: Cough (any) and Bottom: Cough (>=2 weeks)

**Sensitivity**

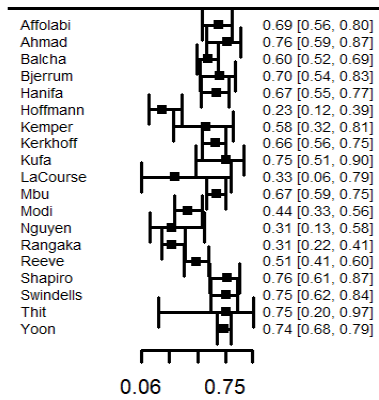

**Specificity**

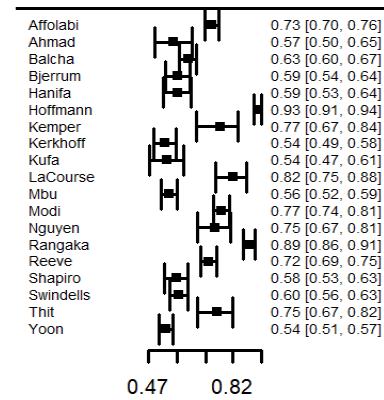

**Sensitivity**

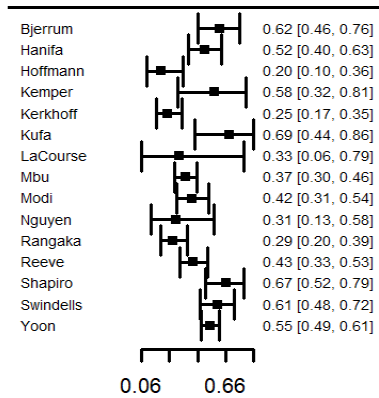

**Specificity**

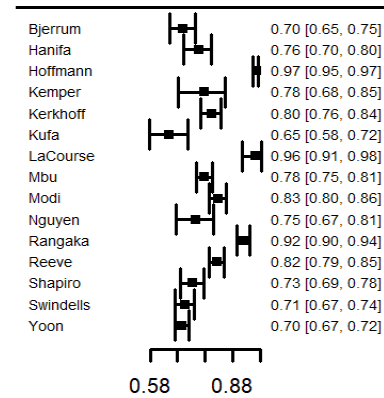

Outpatients (Not on ART) - Forest plot for  
 Top: Hb (<10 g/dL) and Bottom: Hb (<8 g/dL)

**Sensitivity**

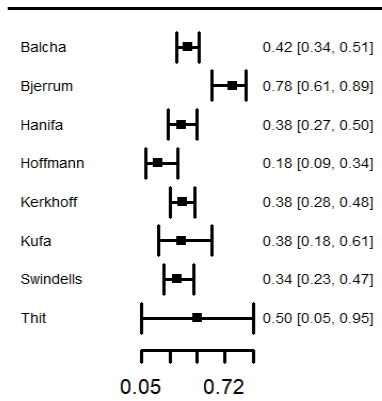

**Specificity**

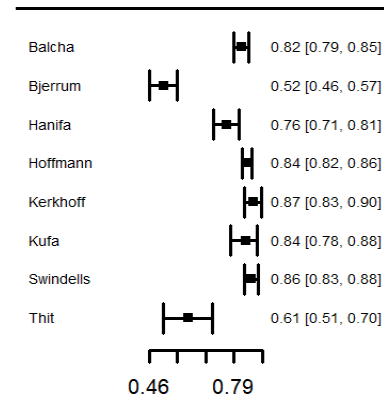

**Sensitivity**

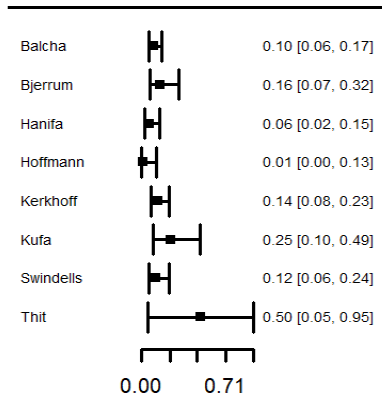

**Specificity**

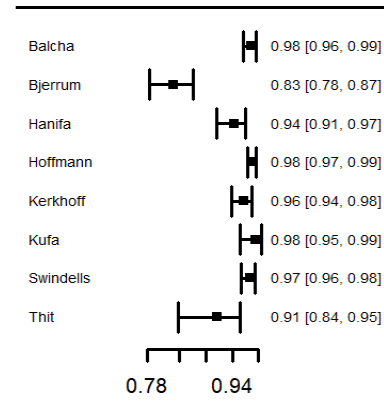

Outpatients (Not on ART) - Forest plot for BMI (<18.5 kg/m<sup>2</sup>)

Sensitivity

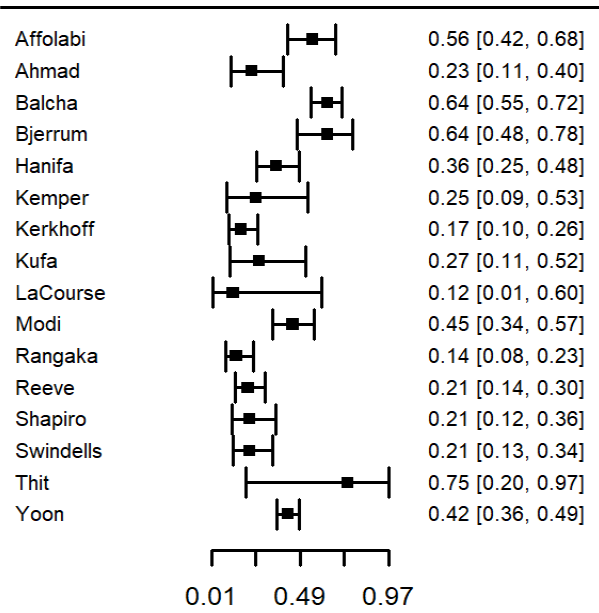

Specificity

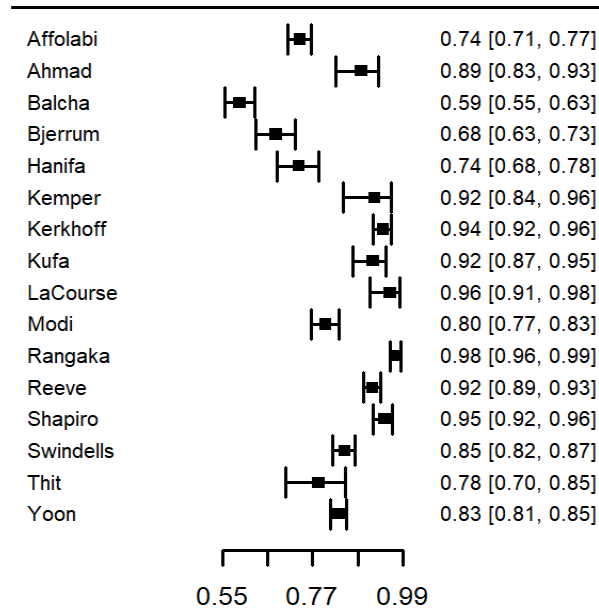



Outpatients (Not on ART) - Forest plot for Lymphadenopathy

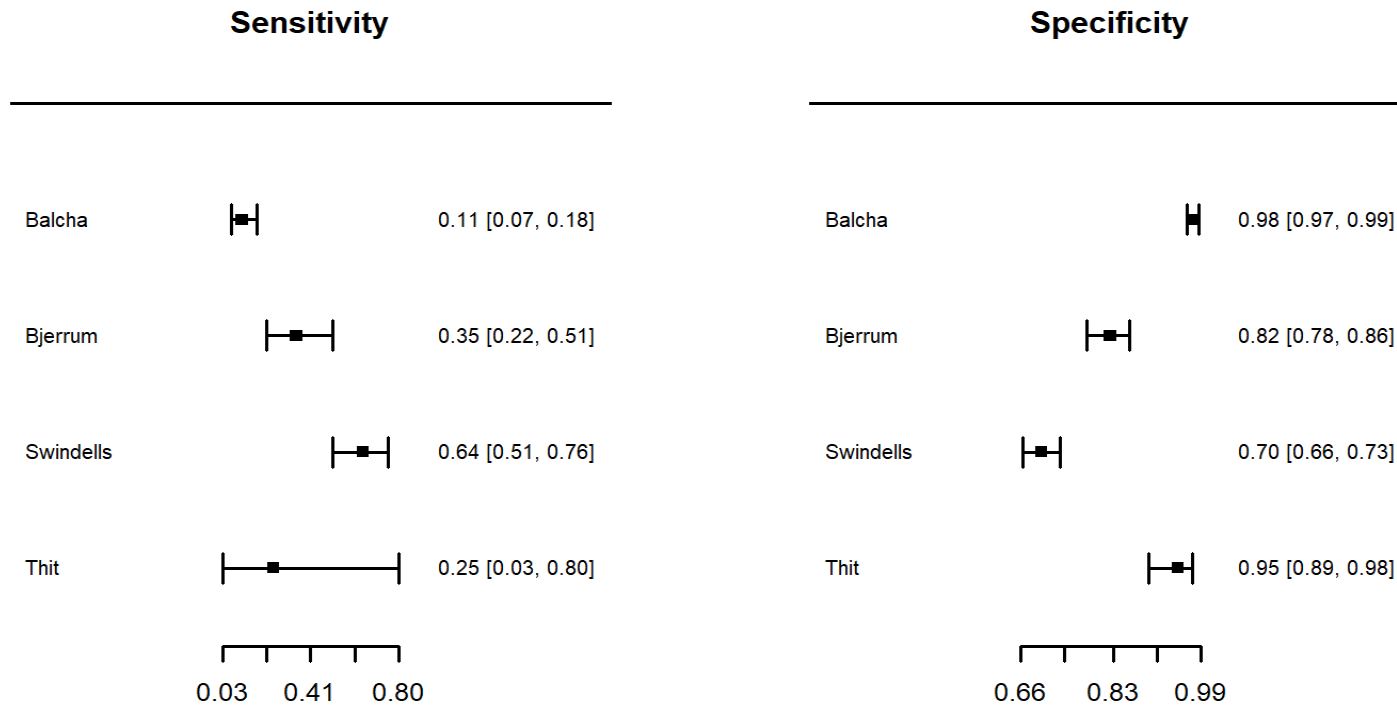

Outpatients (Not on ART) - Forest plot for  
 Top: W4SS with CRP ( $\geq 10$  mg/L) and Bottom: W4SS then CRP ( $\geq 5$  mg/L)

**Sensitivity**

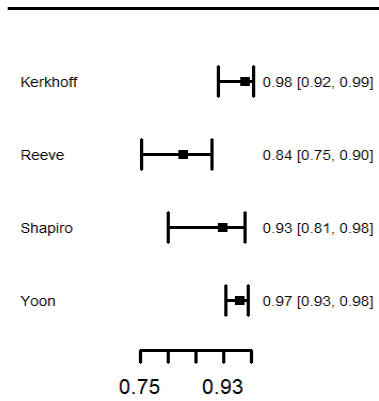

**Specificity**

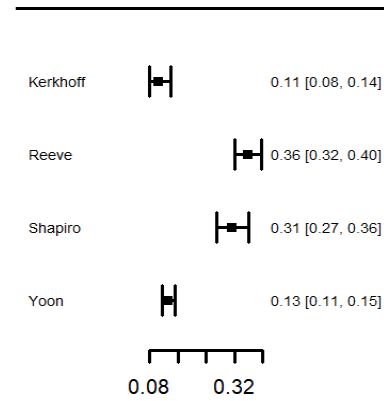

**Sensitivity**

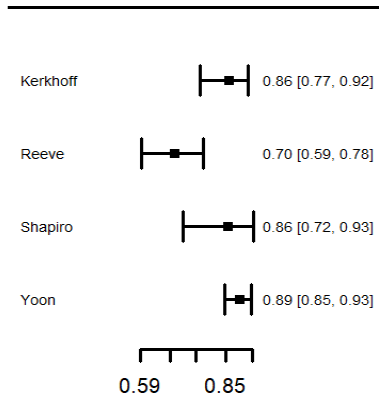

**Specificity**

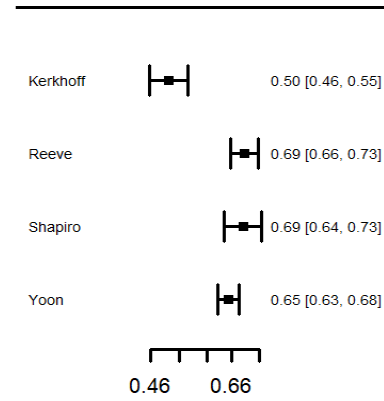

Outpatients (Not on ART) - Forest plot for W4SS with CXR (abnormal)

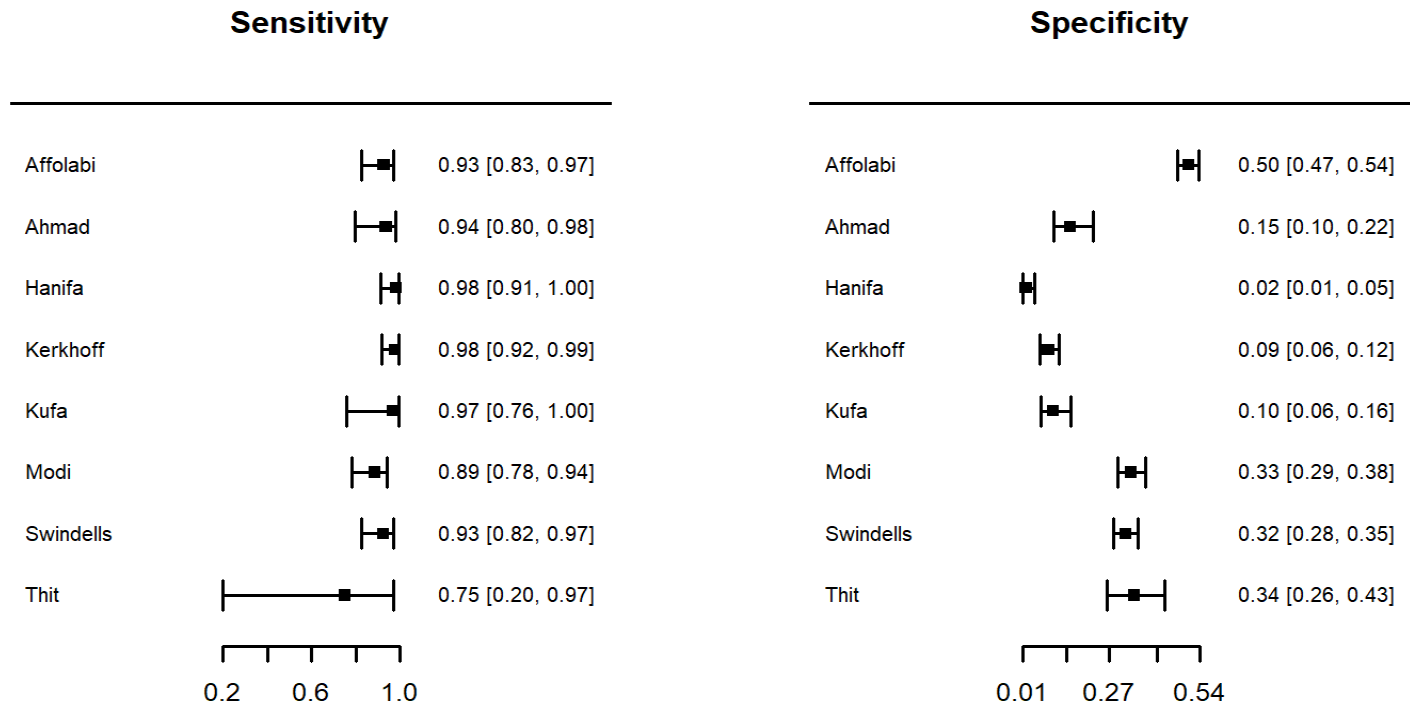

Outpatients (Not on ART) - Forest plot for  
 Top: W4SS then Xpert and Bottom: Xpert alone

**Sensitivity**

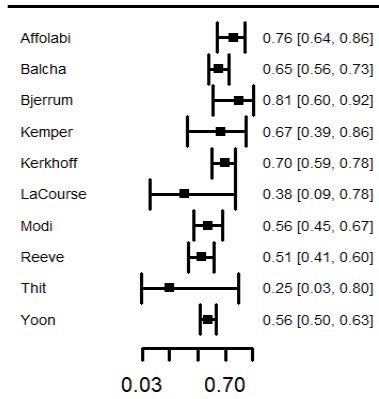

**Specificity**

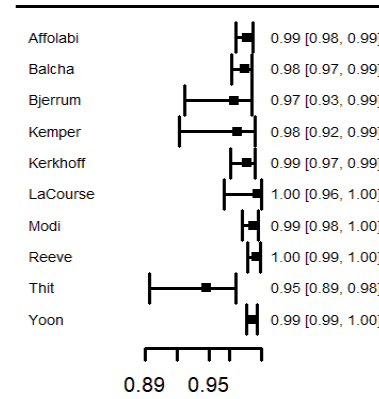

**Sensitivity**

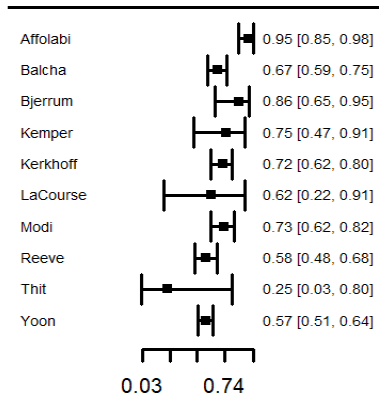

**Specificity**

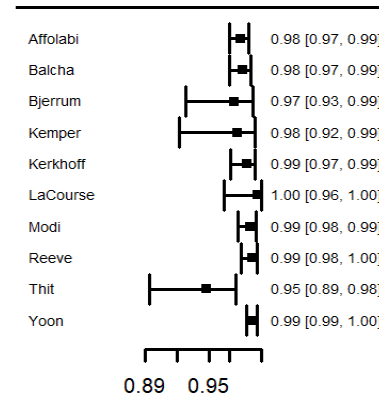

Figure S3D - Forest plots of sensitivity and specificity estimates in participants with a CD4 cell count  $\leq 200$  cells/ $\mu$ L  
 CD4  $\leq 200$  cells/ $\mu$ L - Forest plot for  
 W4SS

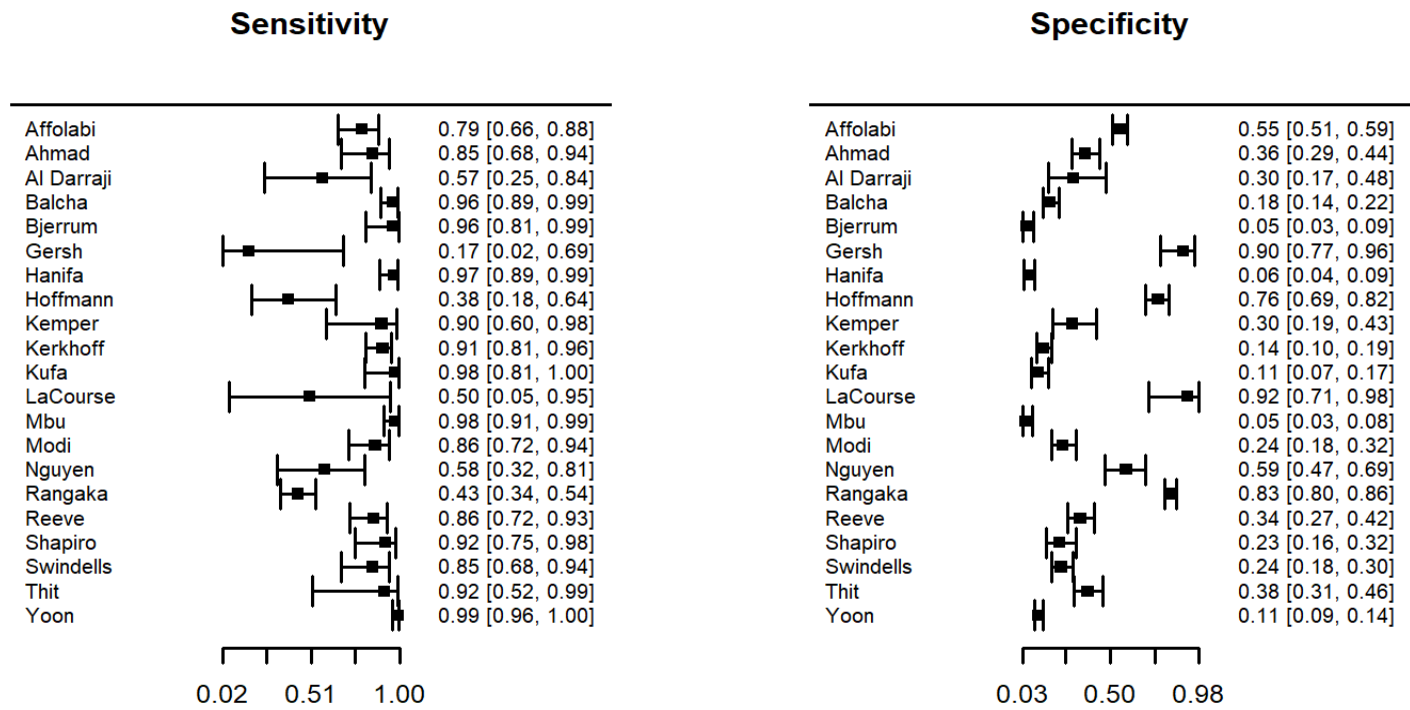

CD4  $\leq$ 200 cells/ $\mu$ L - Forest plot for  
 Top: CRP ( $\geq$ 10 mg/L) and Bottom: CRP ( $\geq$ 5 mg/L)

**Sensitivity**

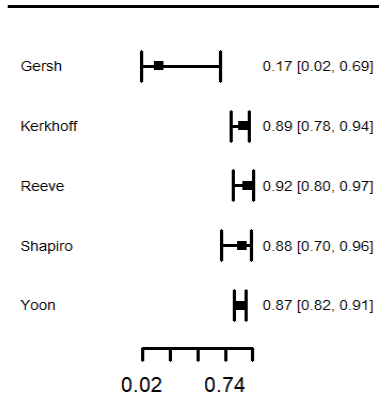

**Specificity**

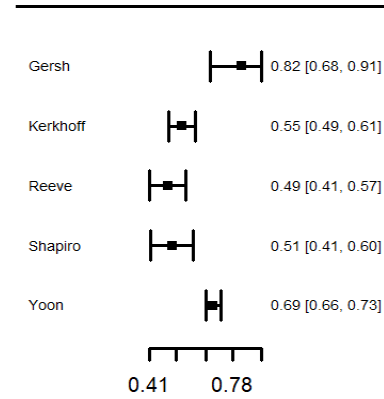

**Sensitivity**

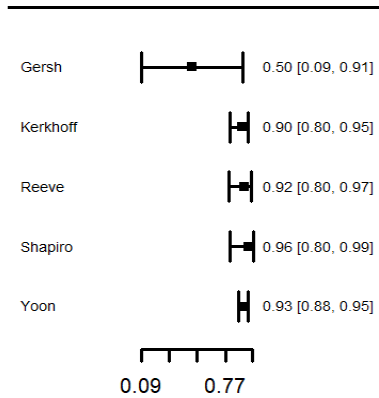

**Specificity**

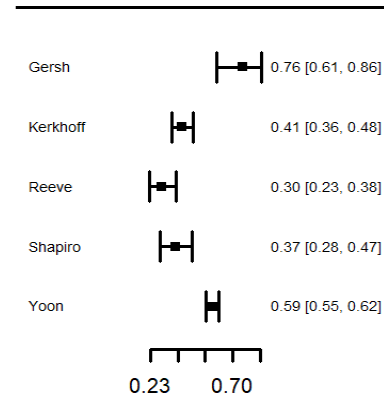

CD4 ≤200 cells/μL - Forest plot for  
 Top: CXR (abnormal) and Bottom: CXR (suggests tuberculosis)

**Sensitivity**

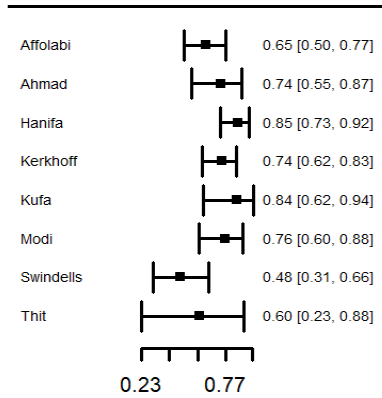

**Specificity**

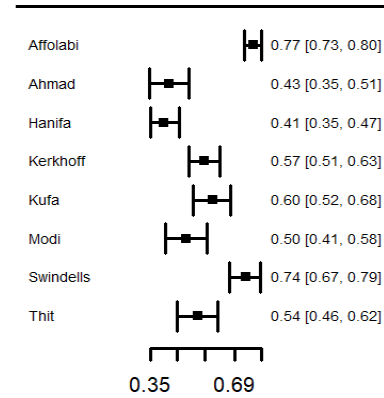

**Sensitivity**

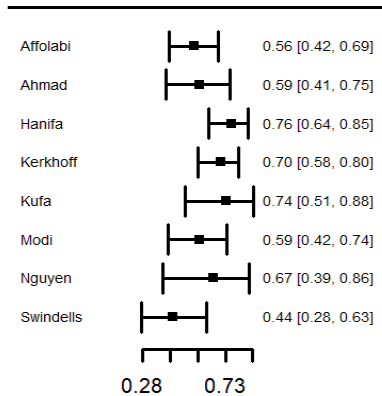

**Specificity**

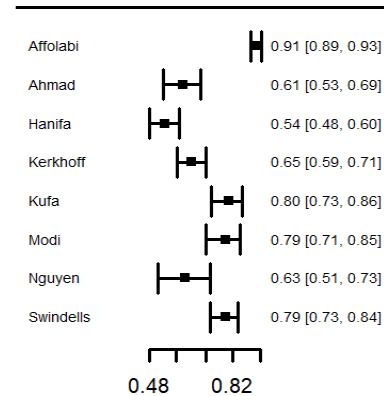

CD4 ≤200 cells/μL - Forest plot for  
Top: Cough (any) and Bottom: Cough (≥2 weeks)

Sensitivity

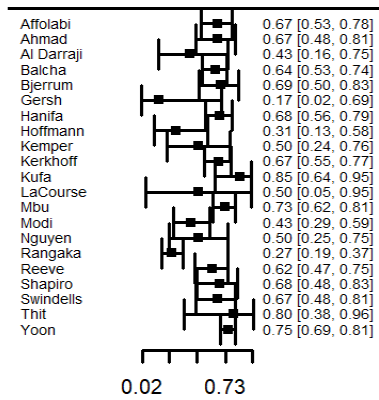

Specificity

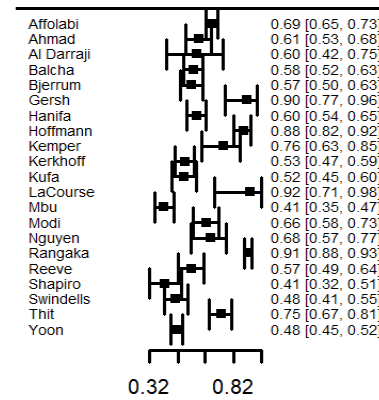

Sensitivity

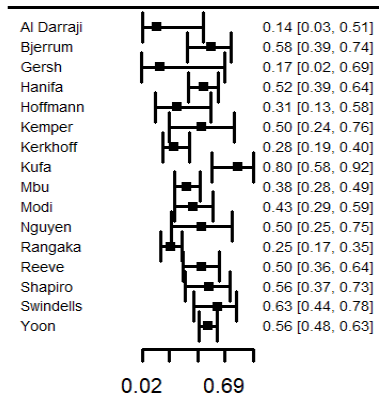

Specificity

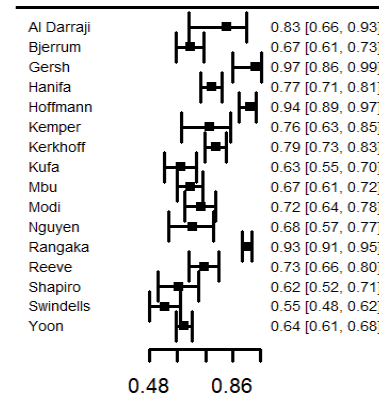



CD4 ≤200 cells/μL - Forest plot for  
 Top: Hb (<10 g/dL) and Bottom: Hb (<8 g/dL)

**Sensitivity**

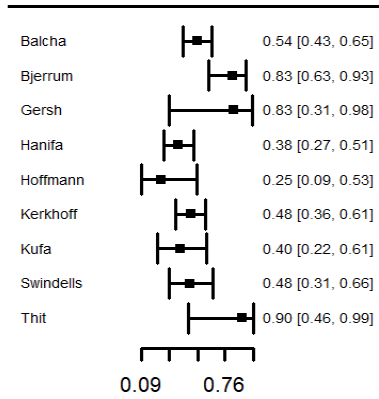

**Specificity**

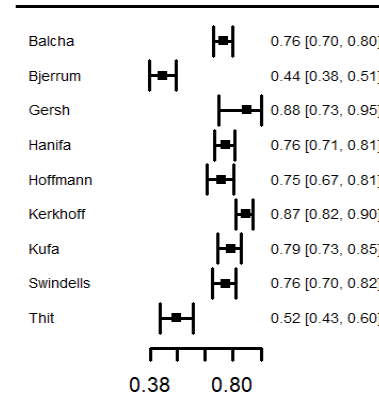

**Sensitivity**

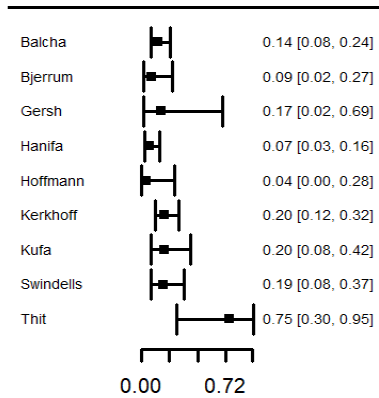

**Specificity**

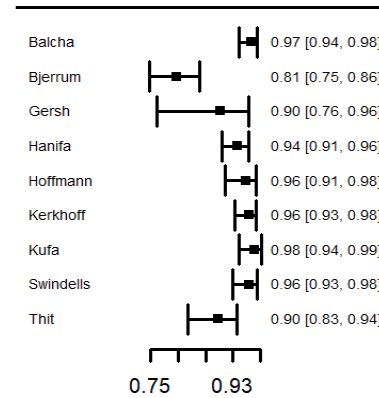

CD4 ≤200 cells/μL - Forest plot for  
BMI (<18.5 kg/m<sup>2</sup>)

**Sensitivity**

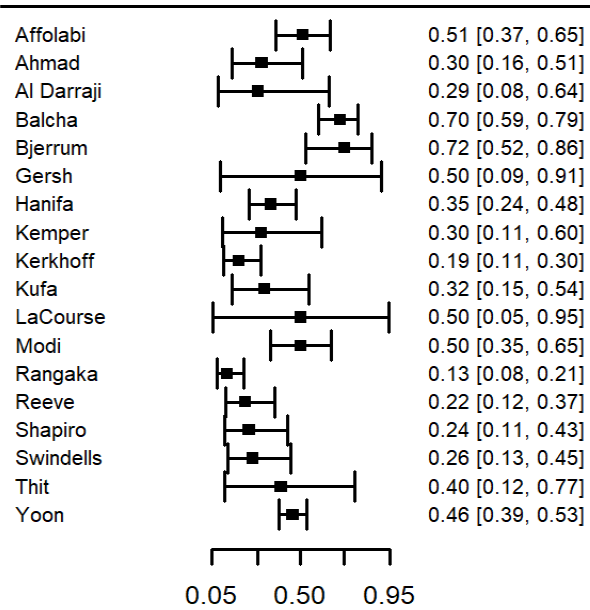

**Specificity**

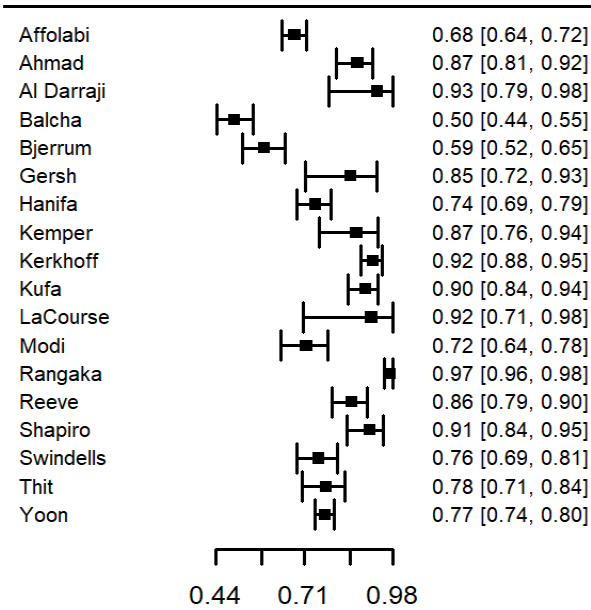

CD4 <=200 cells/μL - Forest plot for Lymphadenopathy

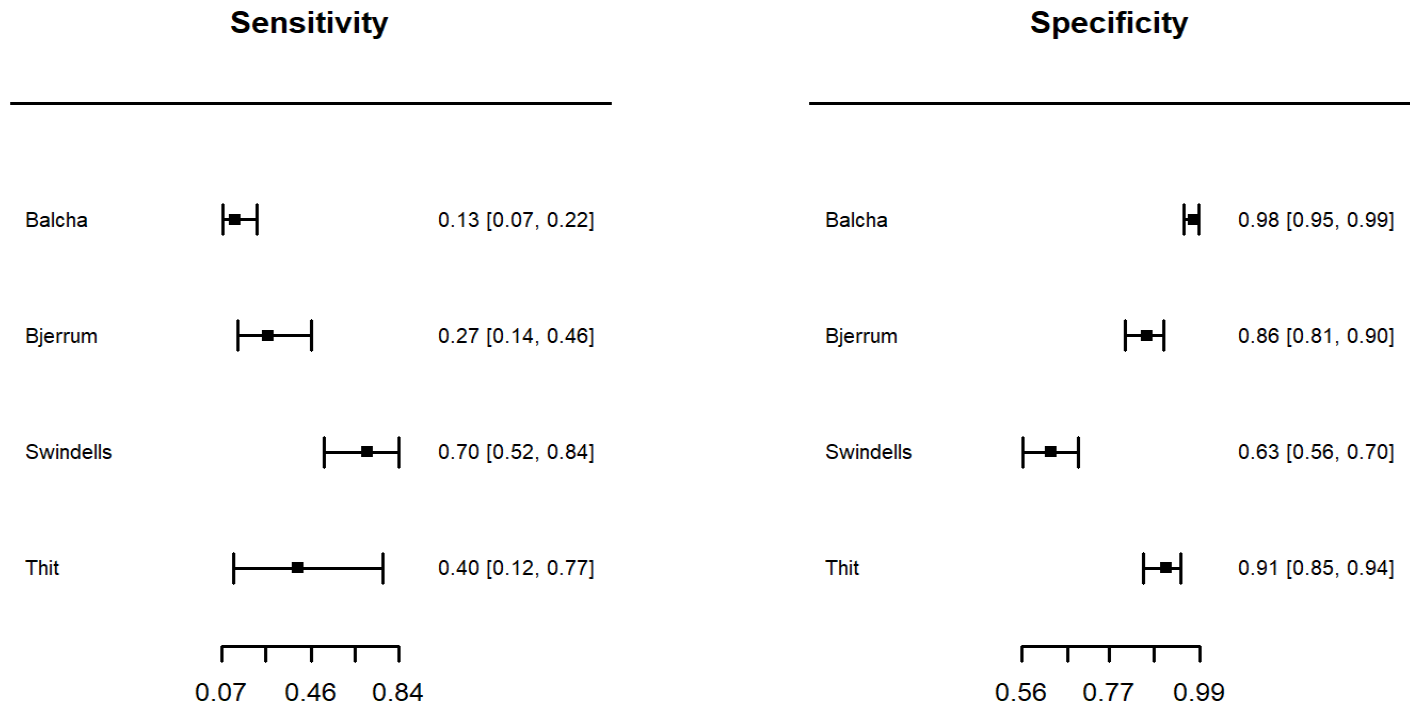

CD4  $\leq$ 200 cells/ $\mu$ L - Forest plot for  
 Top: W4SS with CRP ( $\geq$ 10 mg/L) and Bottom: W4SS then CRP ( $\geq$ 5 mg/L)

**Sensitivity**

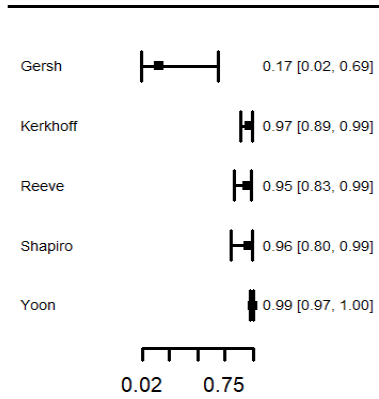

**Specificity**

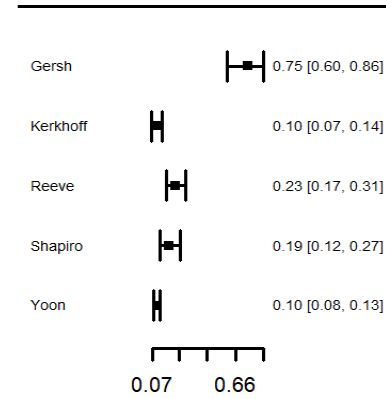

**Sensitivity**

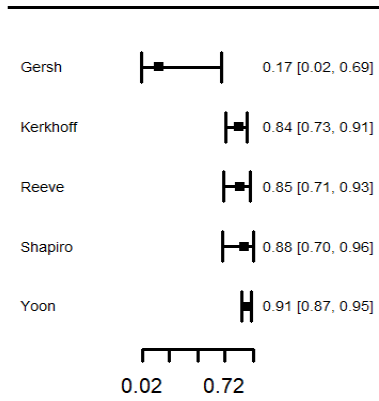

**Specificity**

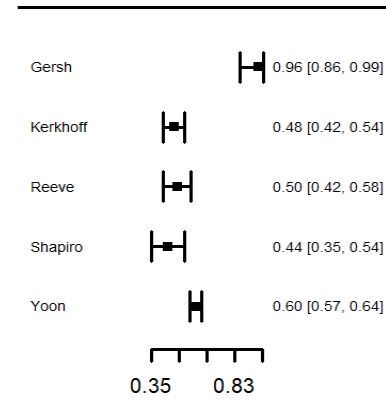

CD4 ≤200 cells/μL - Forest plot for  
W4SS with CXR (abnormal)

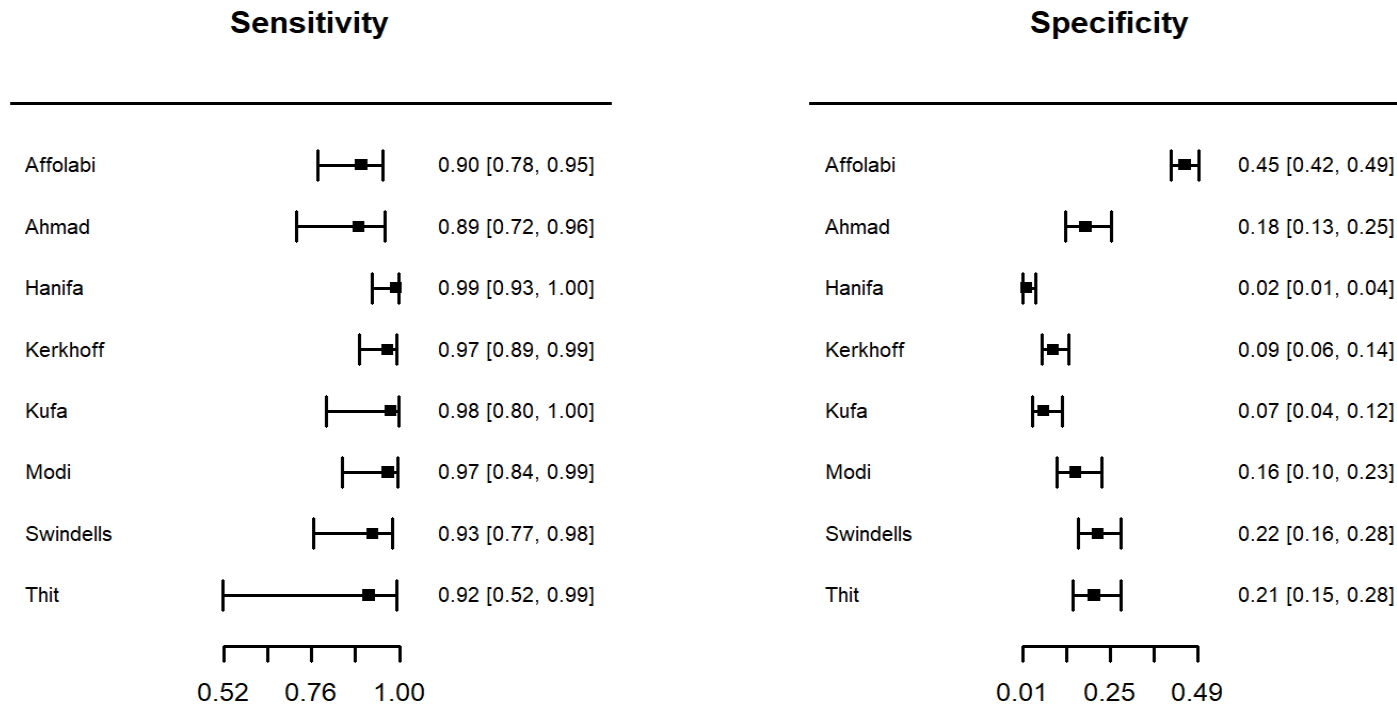

CD4 ≤200 cells/μL - Forest plot for  
 Top: W4SS then Xpert and Bottom: Xpert alone

**Sensitivity**

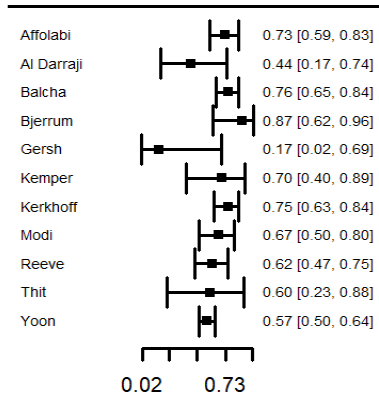

**Specificity**

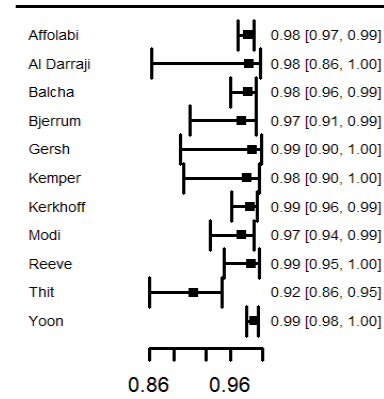

**Sensitivity**

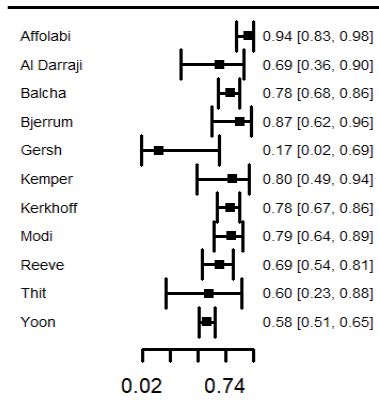

**Specificity**

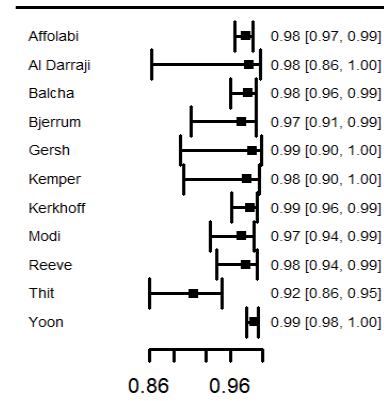

Figure S3E - Forest plots of sensitivity and specificity estimates in participants with a CD4 cell count >200 cells/ $\mu$ L  
 CD4 >200 cells/ $\mu$ L - Forest plot for  
 W4SS

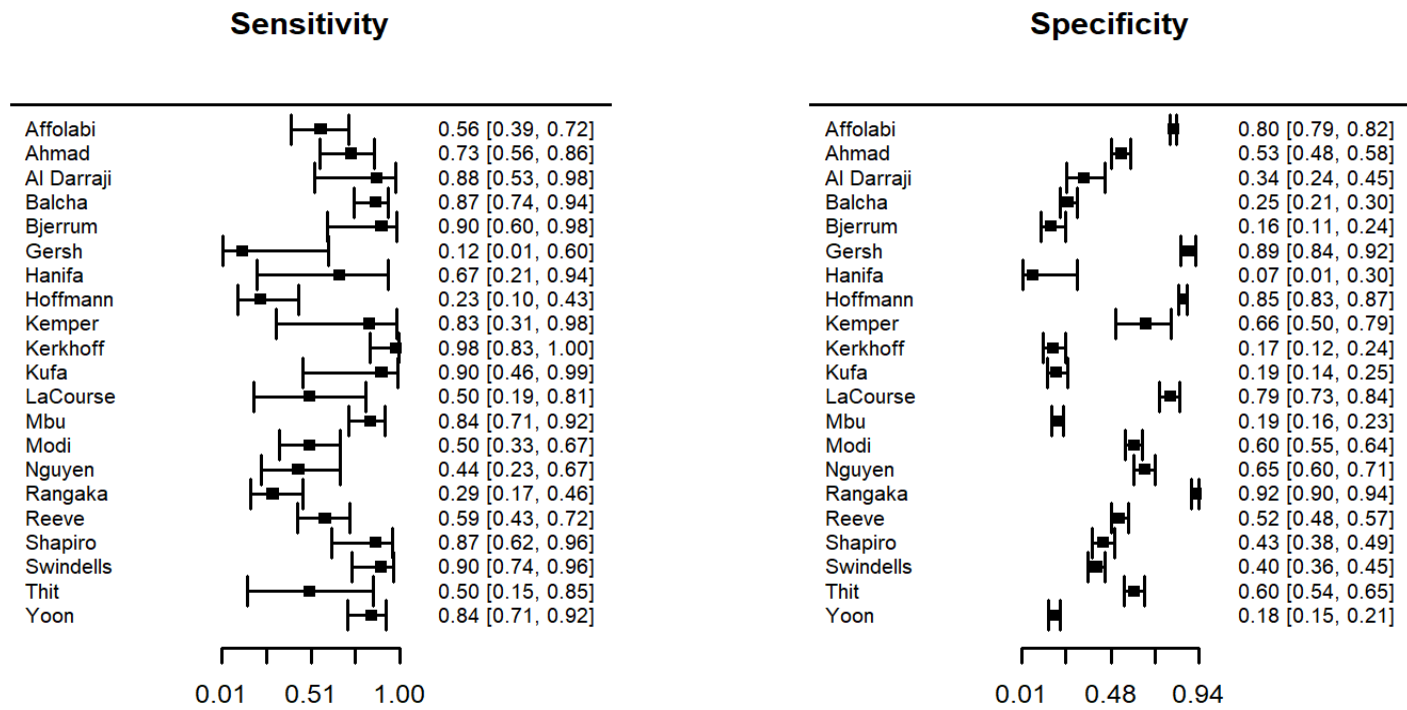

CD4 >200 cells/ $\mu$ L - Forest plot for  
 Top: CRP ( $\geq$ 10 mg/L) and Bottom: CRP ( $\geq$ 5 mg/L)

**Sensitivity**

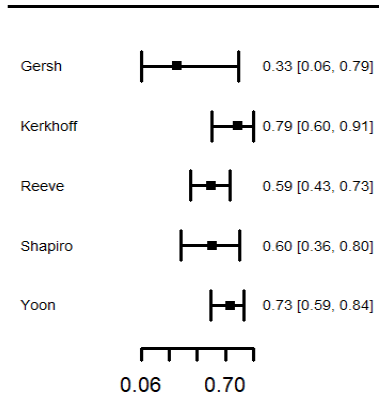

**Specificity**

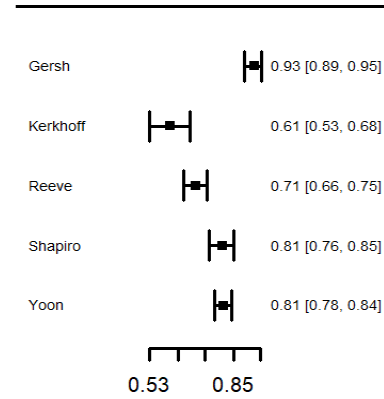

**Sensitivity**

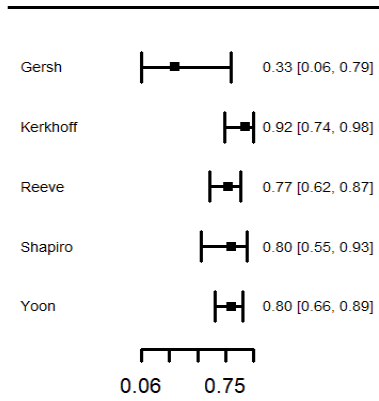

**Specificity**

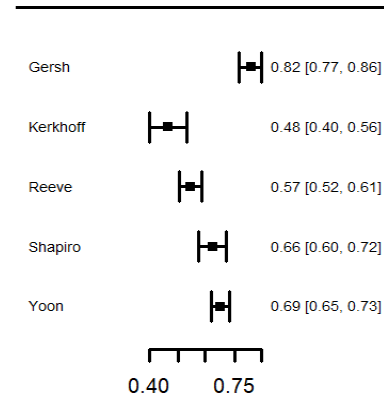



CD4 >200 cells/ $\mu$ L - Forest plot for  
 Top: CXR (abnormal) and Bottom: CXR (suggests tuberculosis)

**Sensitivity**

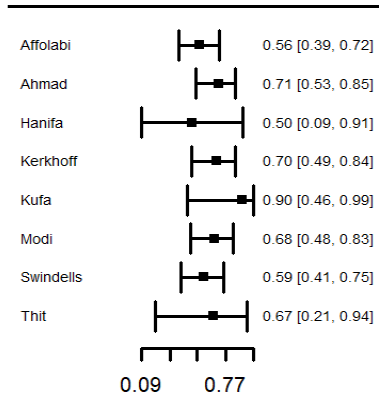

**Specificity**

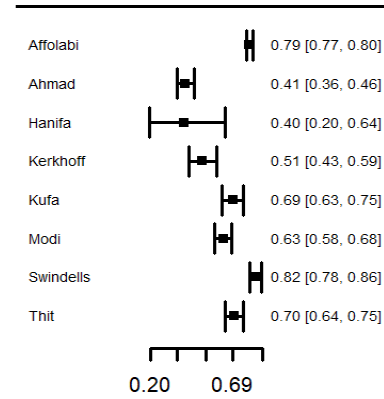

**Sensitivity**

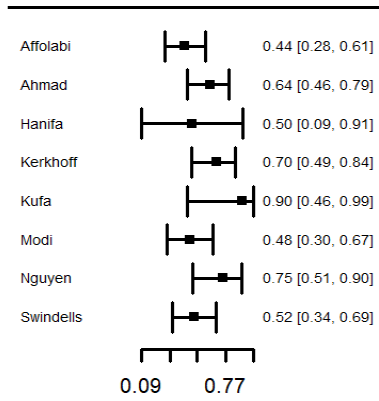

**Specificity**

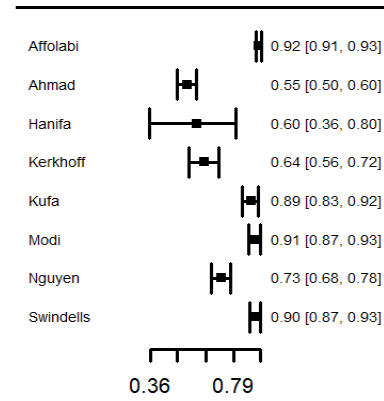

CD4 >200 cells/ $\mu$ L - Forest plot for  
 Top: Cough (any) and Bottom: Cough ( $\geq$ 2 weeks)

**Sensitivity**

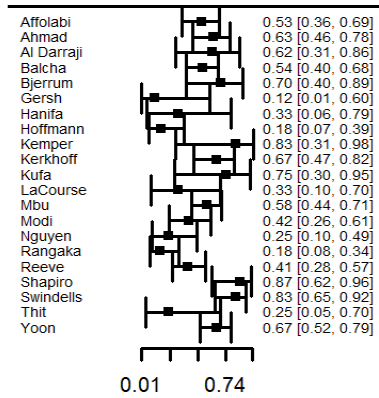

**Specificity**

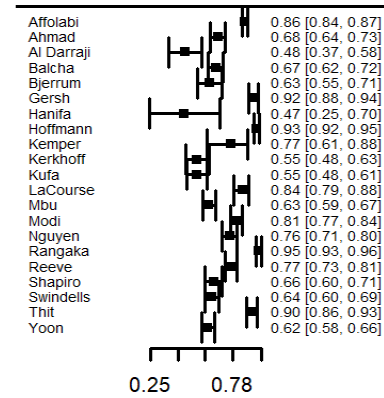

**Sensitivity**

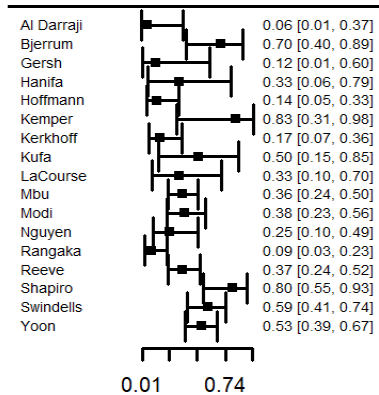

**Specificity**

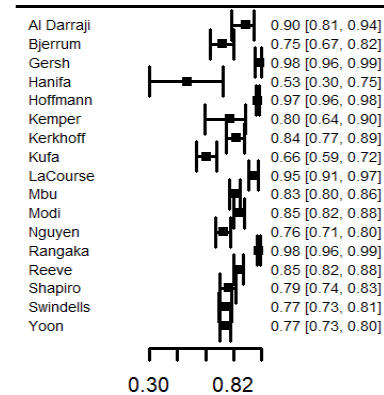

CD4 >200 cells/ $\mu$ L - Forest plot for  
 Top: Hb (<10 g/dL) and Bottom: Hb (<8 g/dL)

**Sensitivity**

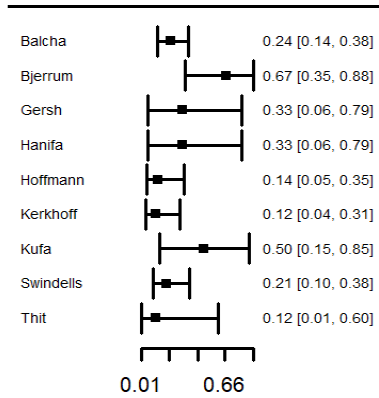

**Specificity**

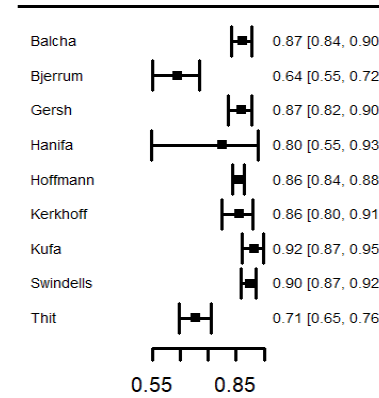

**Sensitivity**

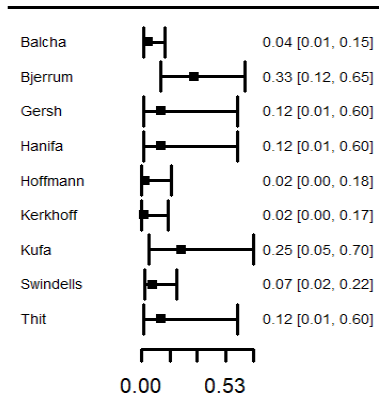

**Specificity**

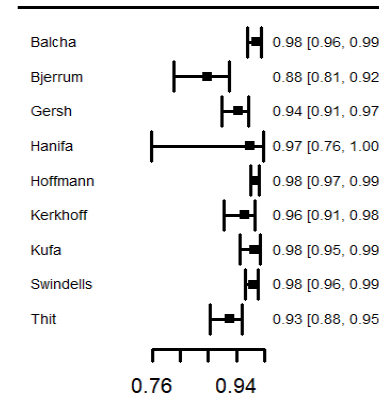

CD4 >200 cells/ $\mu$ L - Forest plot for  
BMI (<18.5 kg/m<sup>2</sup>)

**Sensitivity**

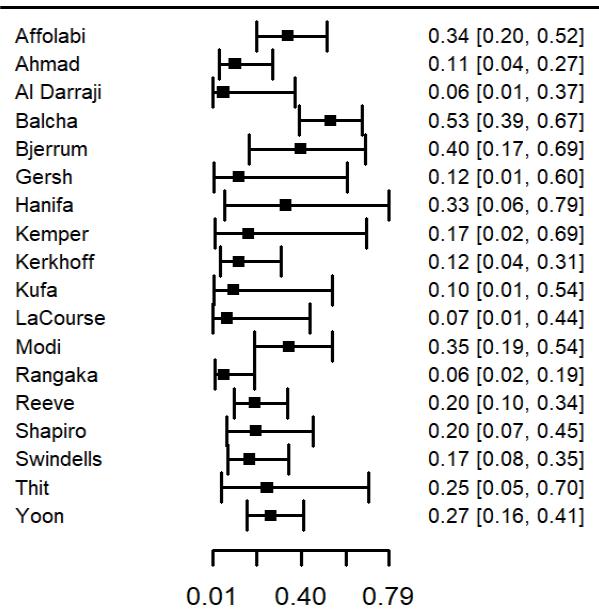

**Specificity**

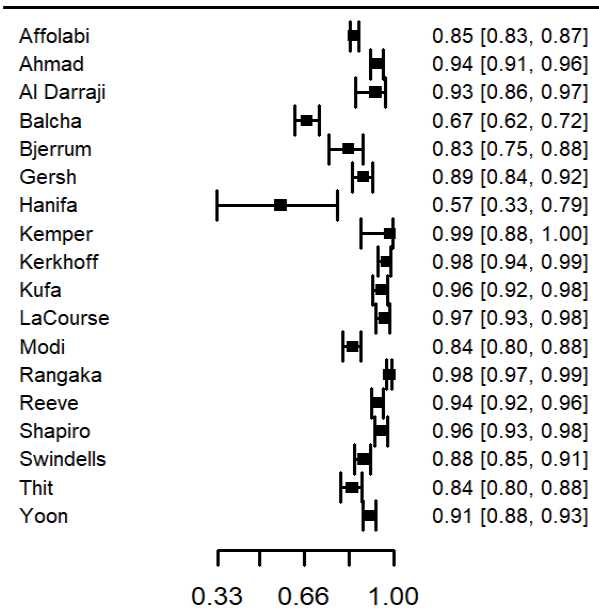

CD4 >200 cells/ $\mu$ L - Forest plot for Lymphadenopathy

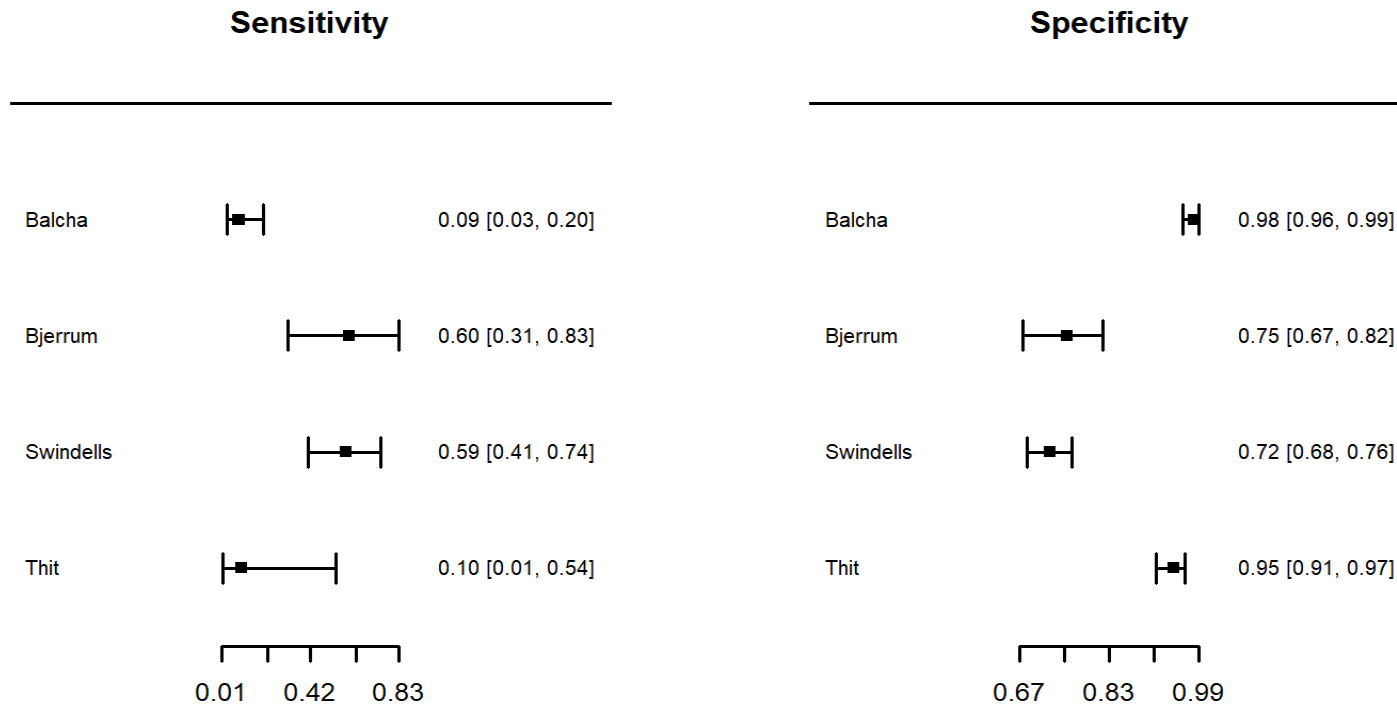

CD4 >200 cells/ $\mu$ L - Forest plot for  
 Top: W4SS with CRP ( $\geq 10$  mg/L) and Bottom: W4SS then CRP ( $\geq 5$  mg/L)

**Sensitivity**

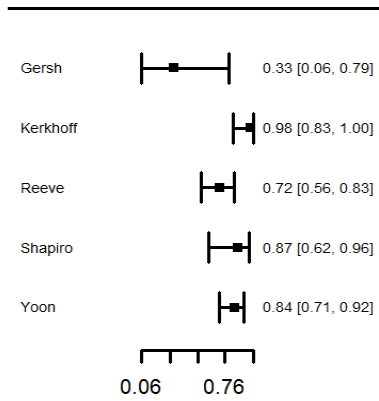

**Specificity**

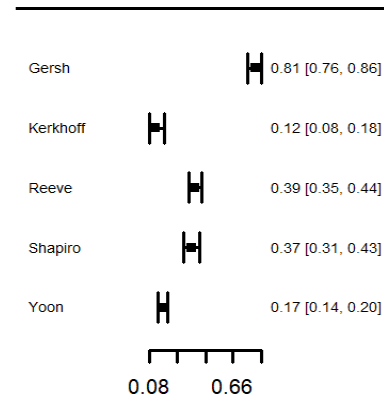

**Sensitivity**

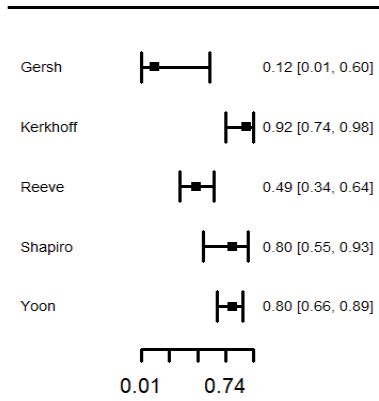

**Specificity**

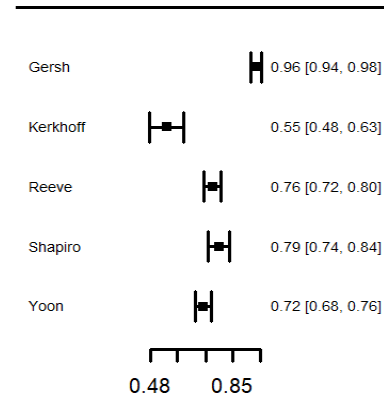

CD4 >200 cells/ $\mu$ L - Forest plot for  
W4SS with CXR (abnormal)

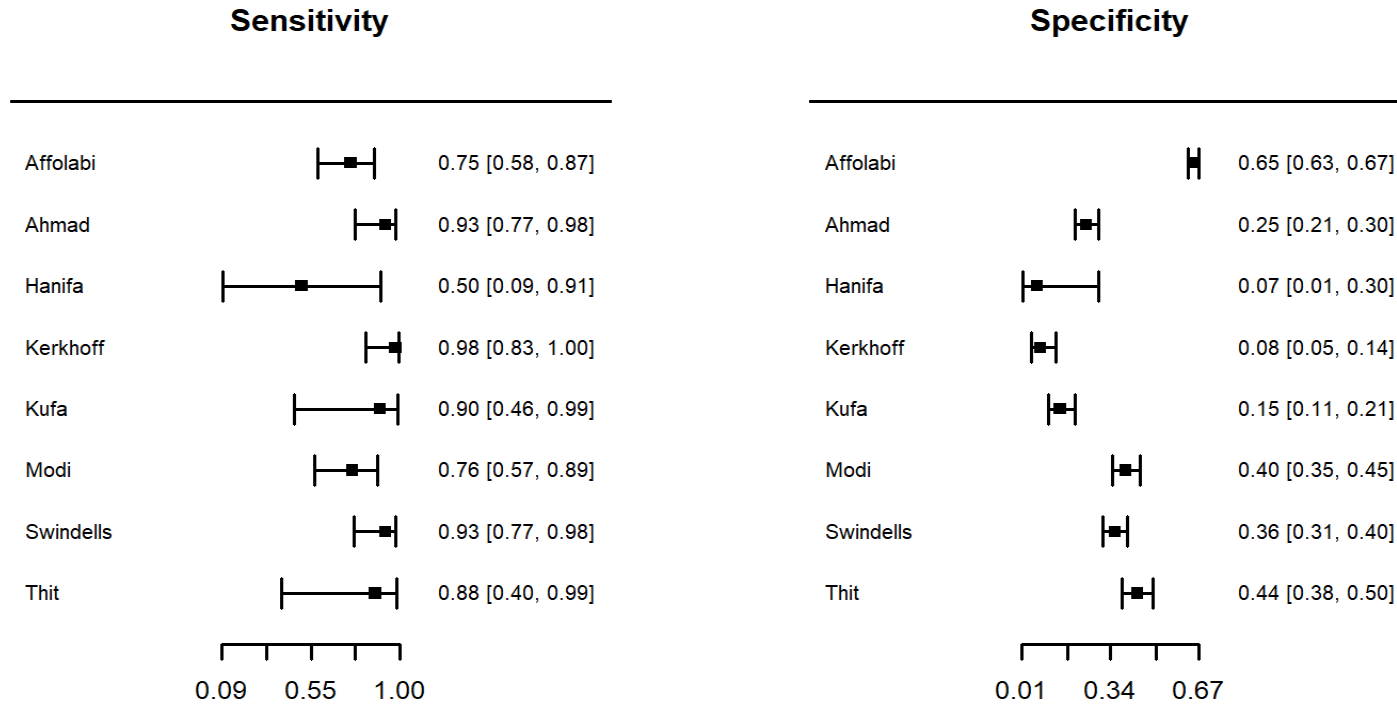

CD4 >200 cells/ $\mu$ L - Forest plot for  
 Top: W4SS then Xpert and Bottom: Xpert alone

**Sensitivity**

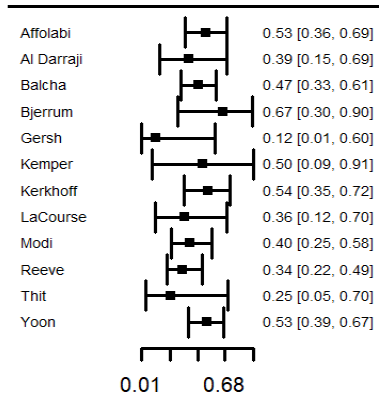

**Specificity**

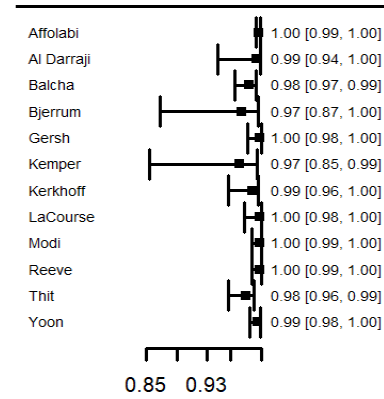

**Sensitivity**

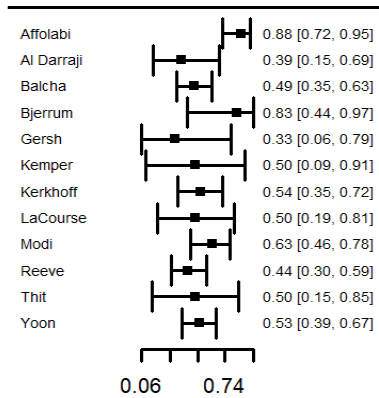

**Specificity**

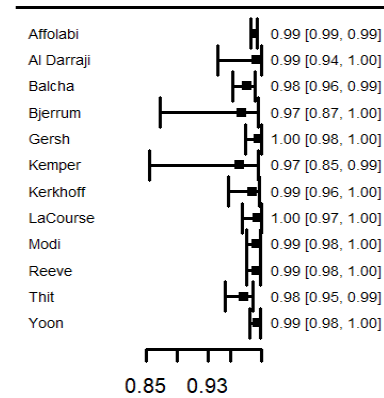



Figure S3F - Forest plots of sensitivity and specificity estimates in pregnant participants  
 Pregnant - Forest plot for  
 W4SS

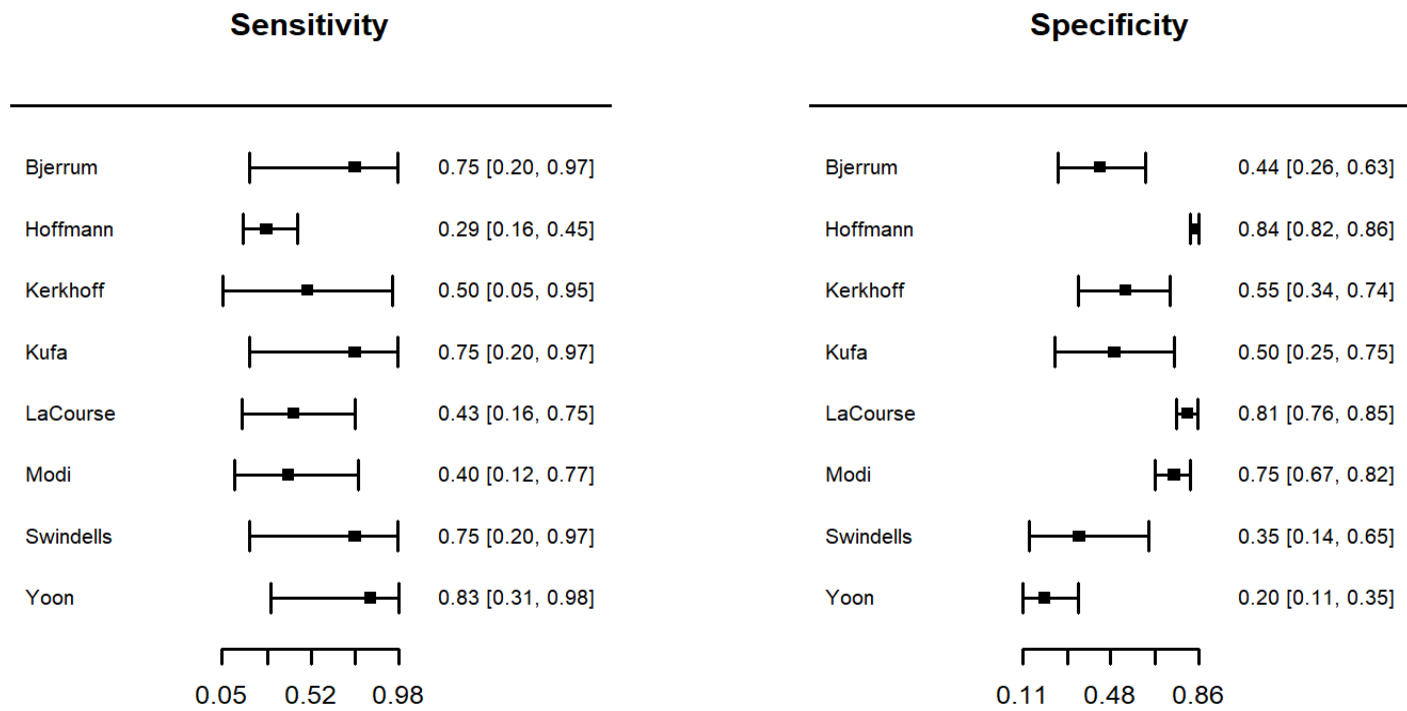

Pregnant - Forest plot for  
Top: CRP ( $\geq 10$  mg/L) and Bottom: CRP ( $\geq 5$  mg/L)

**Sensitivity**

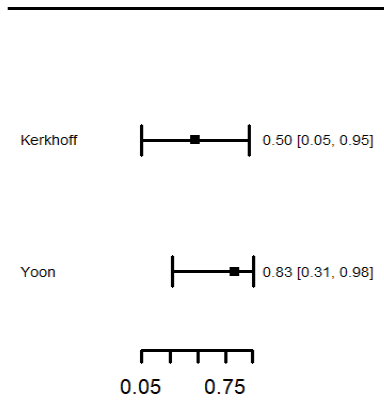

**Specificity**

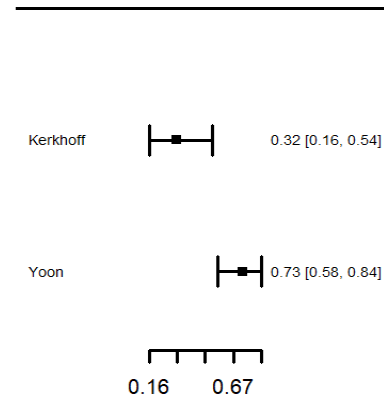

**Sensitivity**

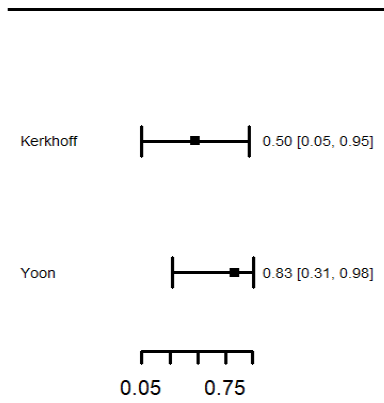

**Specificity**

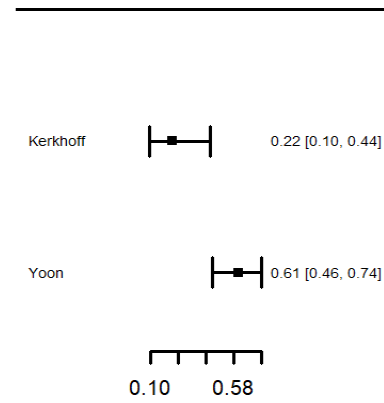

Pregnant - Forest plot for  
Top: CXR (abnormal) and Bottom: CXR (suggests tuberculosis)

**Sensitivity**

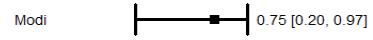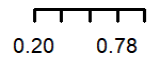

**Specificity**

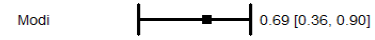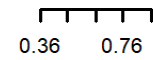

**Sensitivity**

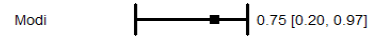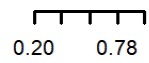

**Specificity**

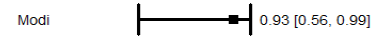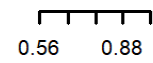

Pregnant - Forest plot for  
 Top: Cough (any) and Bottom: Cough ( $\geq 2$  weeks)

**Sensitivity**

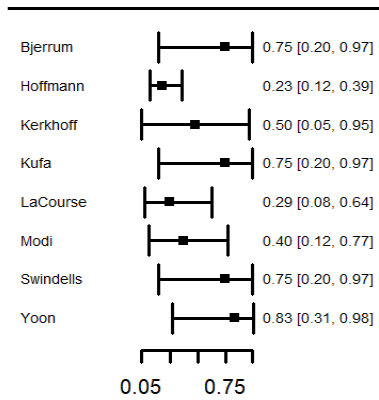

**Specificity**

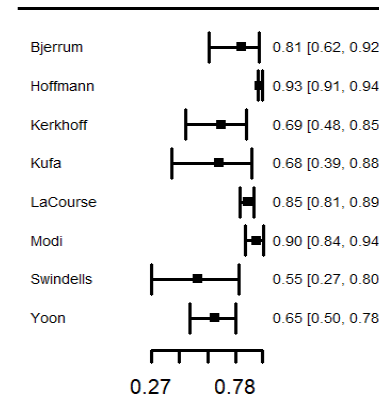

**Sensitivity**

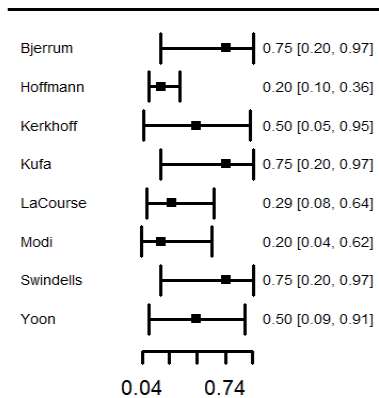

**Specificity**

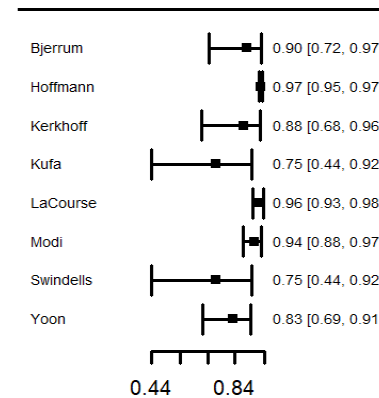

Pregnant - Forest plot for  
 Top: Hb (<10 g/dL) and Bottom: Hb (<8 g/dL)

**Sensitivity**

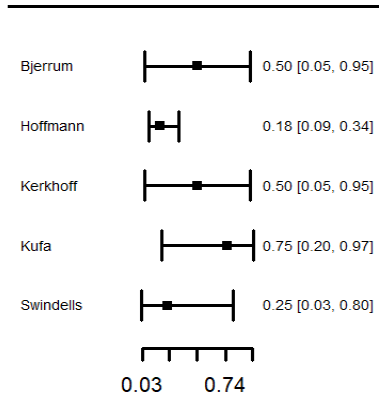

**Specificity**

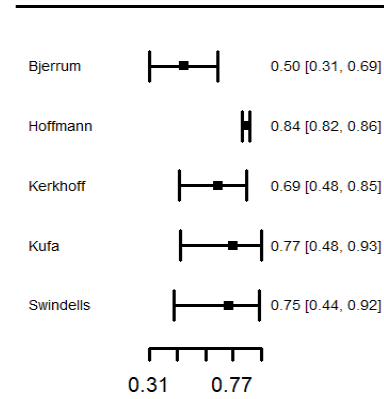

**Sensitivity**

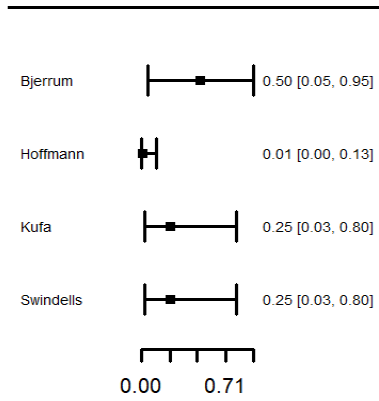

**Specificity**

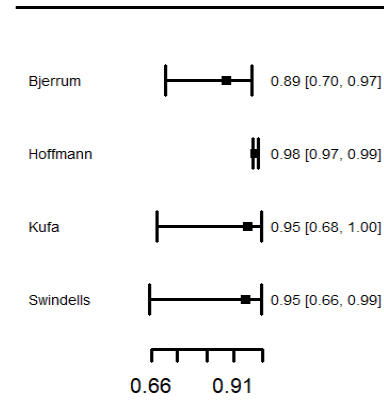

Pregnant - Forest plot for  
BMI (<18.5 kg/m<sup>2</sup>)

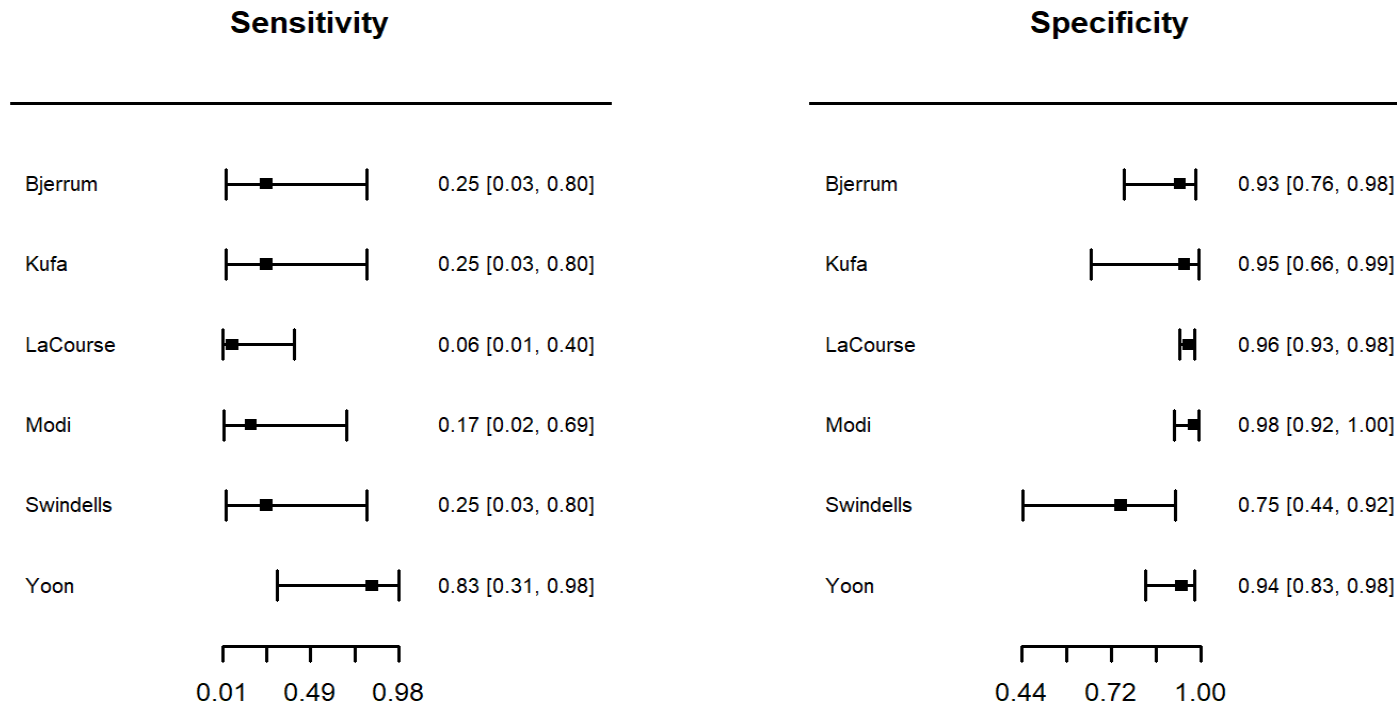

Pregnant - Forest plot for  
Lymphadenopathy

**Sensitivity**

**Specificity**

Bjerrum |-----■-----| 0.25 [0.03, 0.80]

Bjerrum |-----■-----| 0.90 [0.72, 0.97]

Swindells |-----■-----| 0.25 [0.03, 0.80]

Swindells |-----■-----| 0.55 [0.27, 0.80]

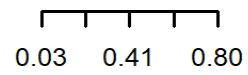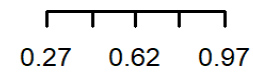

Pregnant - Forest plot for  
 Top: W4SS with CRP ( $\geq 10$  mg/L) and Bottom: W4SS then CRP ( $\geq 5$  mg/L)

**Sensitivity**

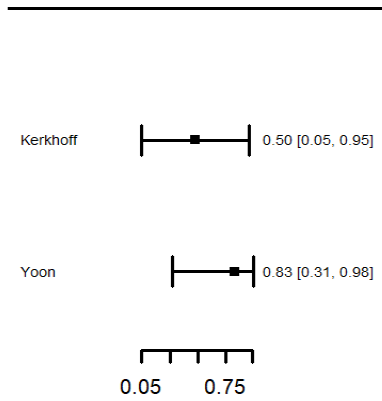

**Specificity**

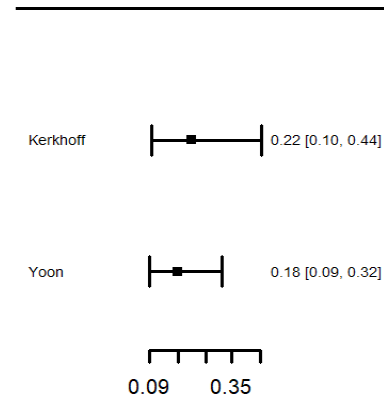

**Sensitivity**

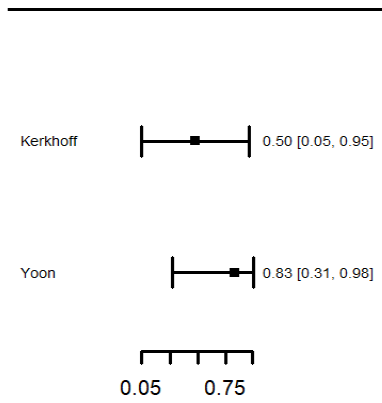

**Specificity**

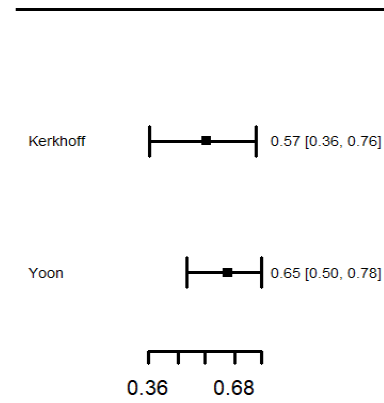



Pregnant - Forest plot for  
W4SS with CXR (abnormal)

**Sensitivity**

**Specificity**

Modi

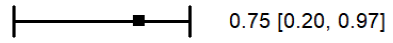

Modi

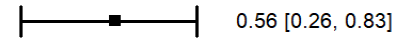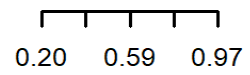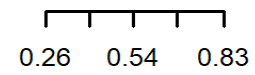

Pregnant - Forest plot for  
Top: W4SS then Xpert and Bottom: Xpert alone

**Sensitivity**

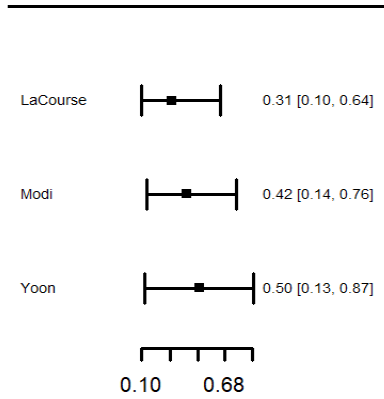

**Specificity**

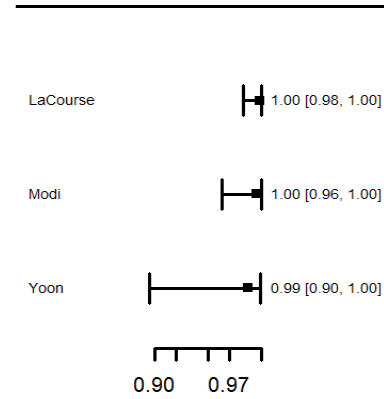

**Sensitivity**

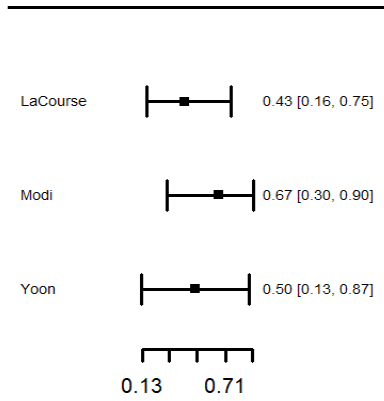

**Specificity**

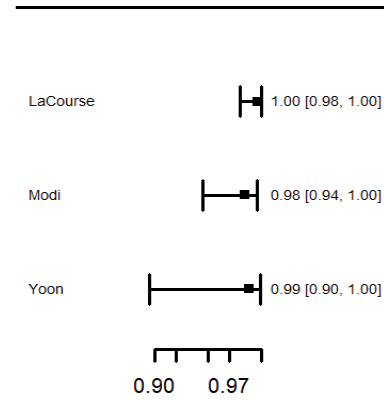

**Figure S4 - Summary receiver operating characteristics curves in all participants and subgroups (for tests/strategies with  $\geq 2$  studies available)**

Figure S4A - Summary receiver operating characteristics curves comparing each test and WHO four-symptom screen for the detection of tuberculosis in all participants

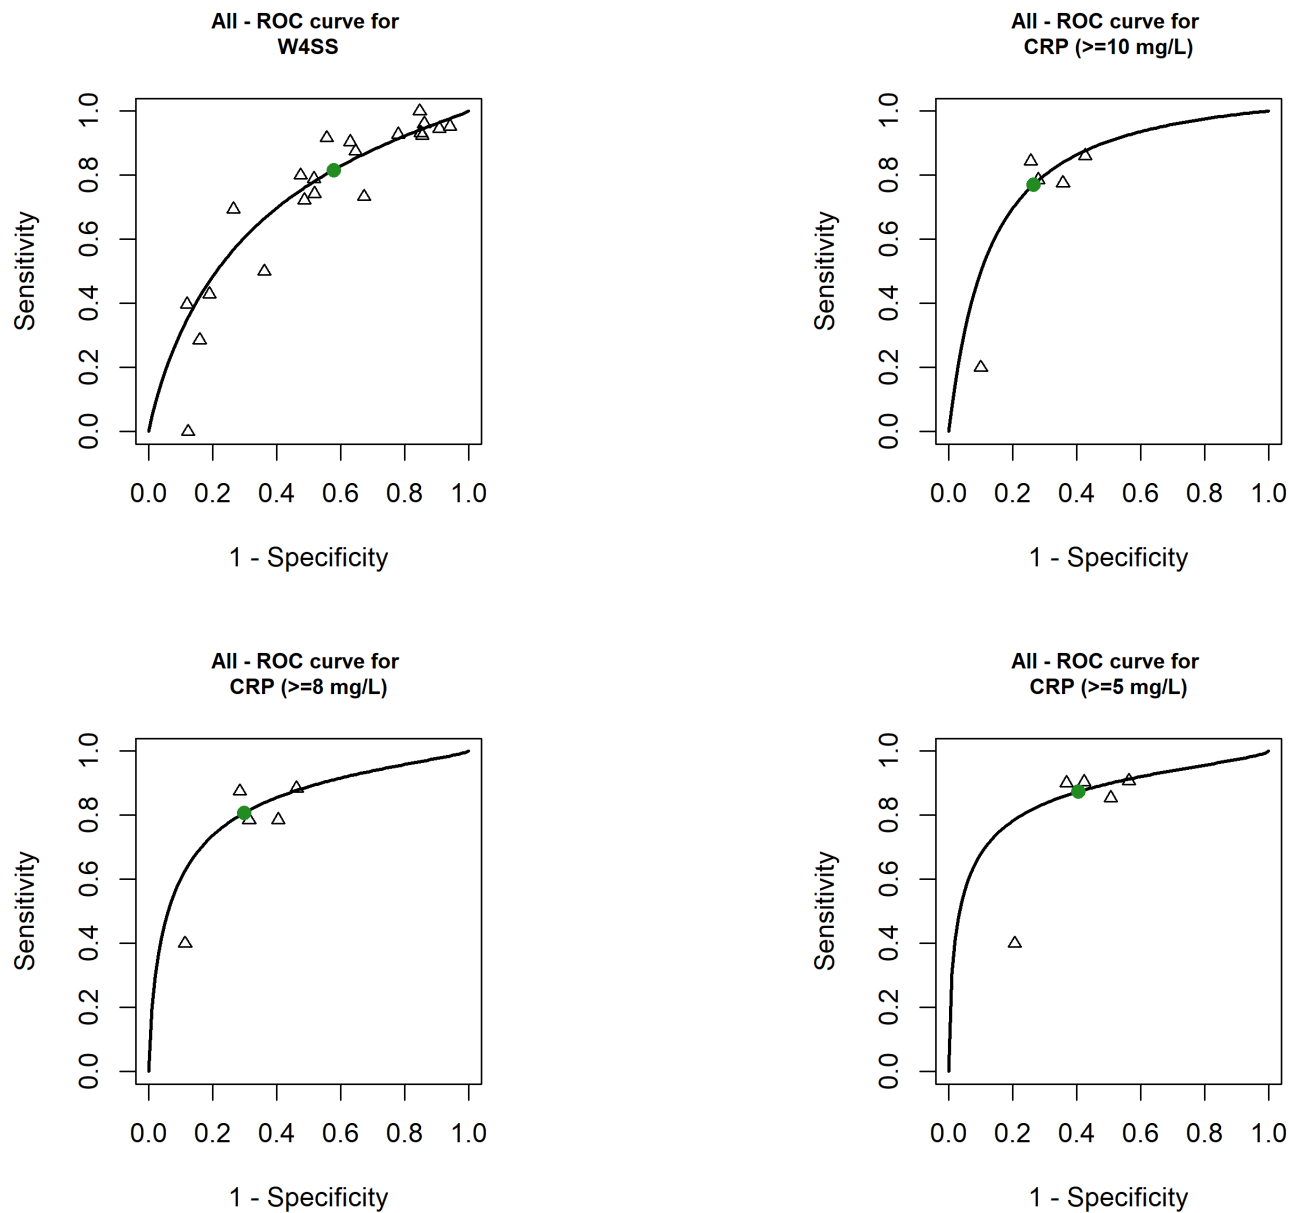

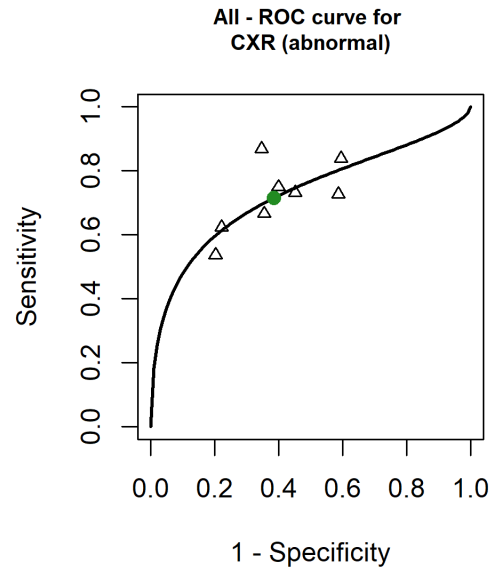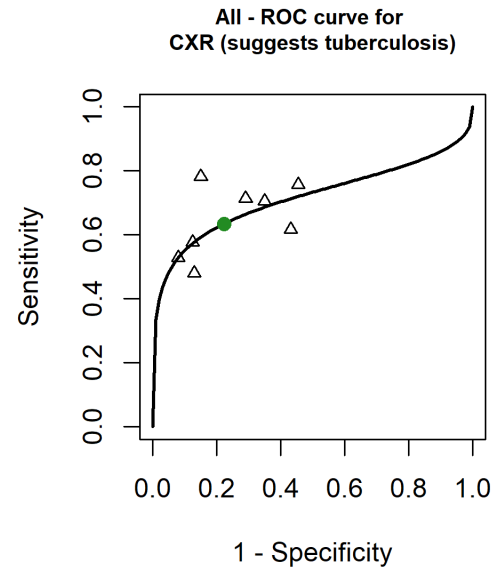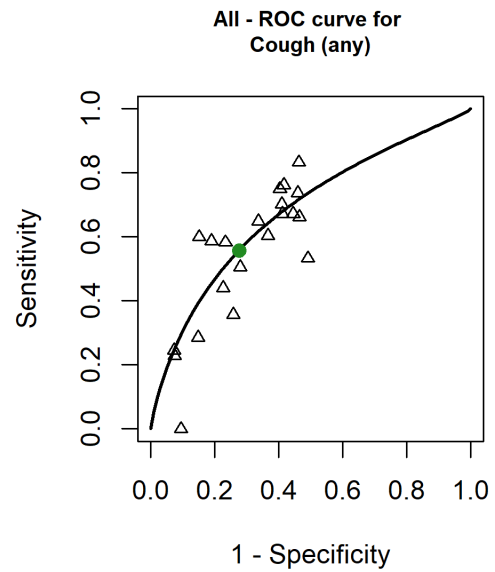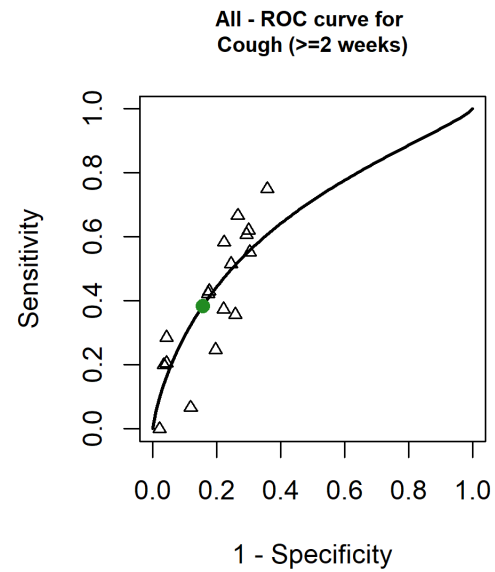

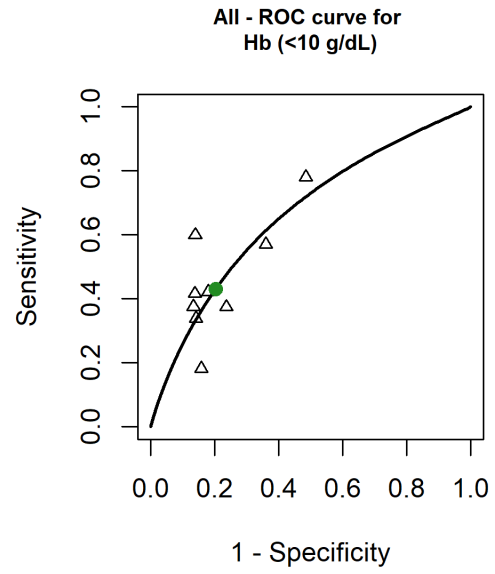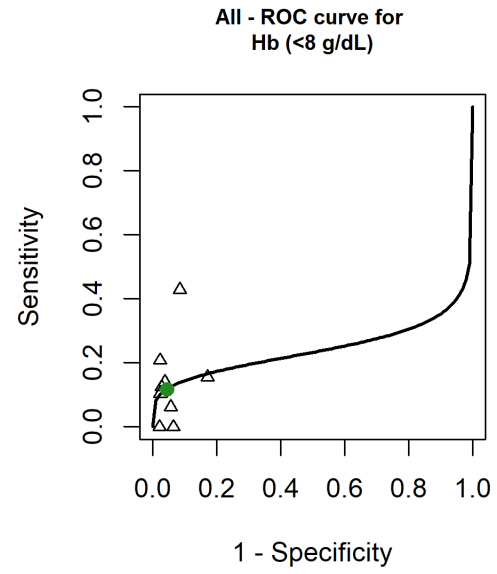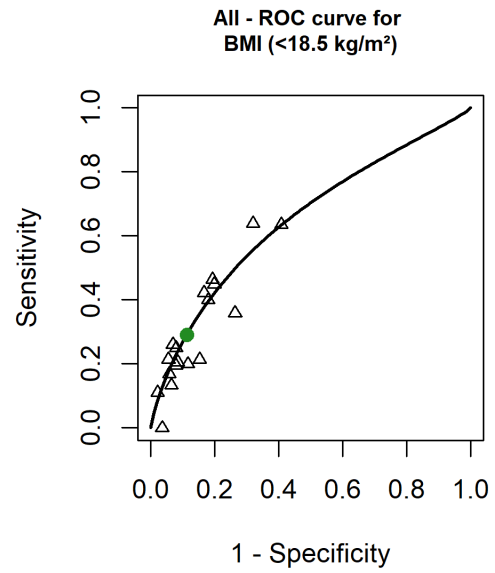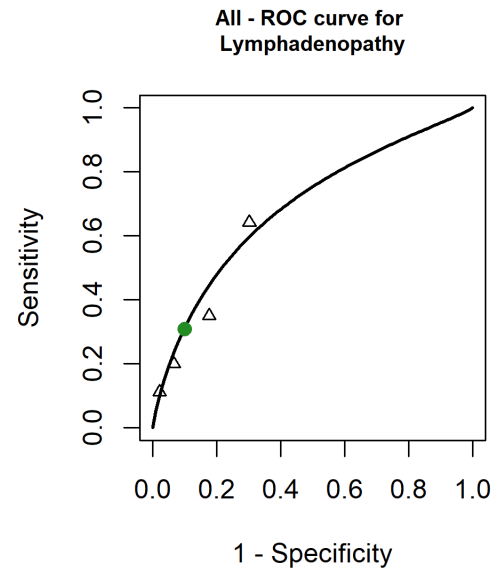

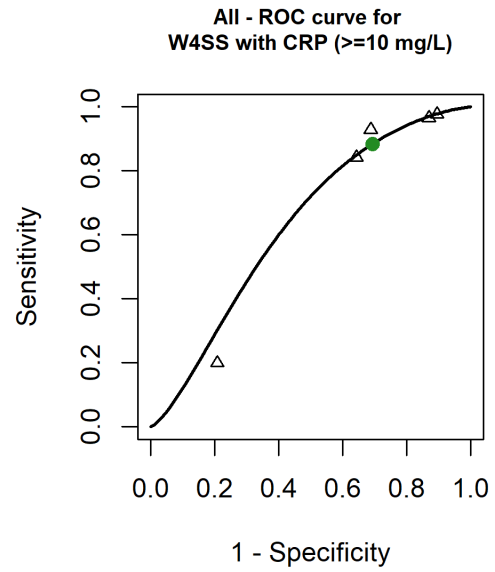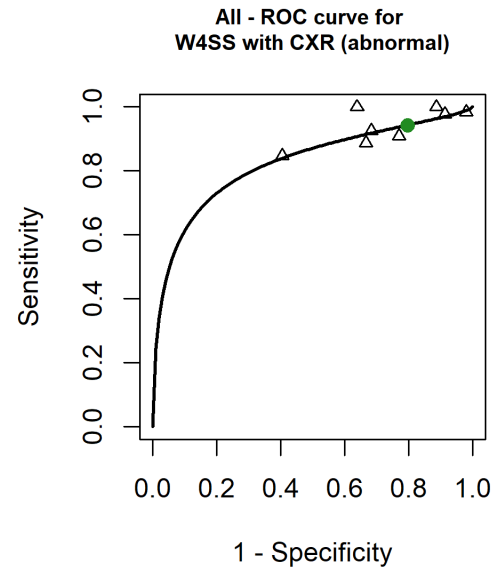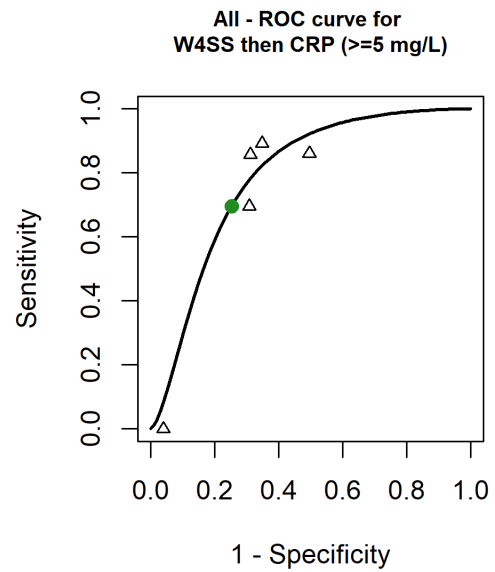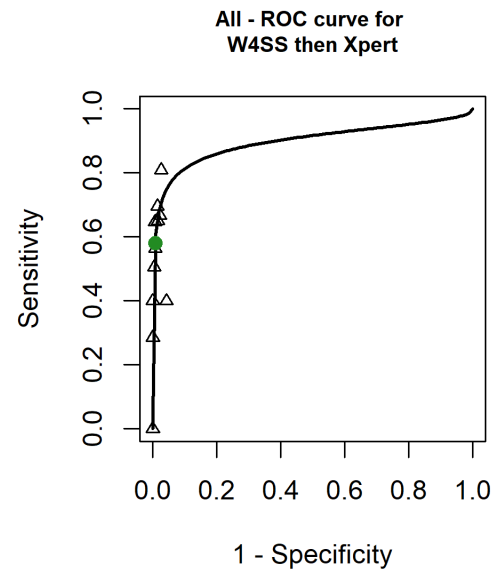

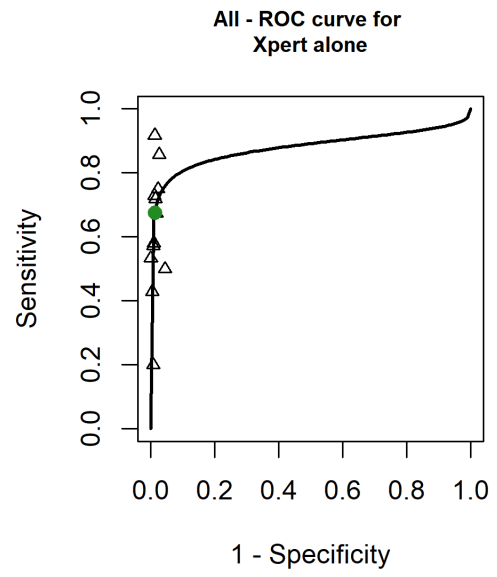

Figure S4B - Summary receiver operating characteristics curves comparing each test and WHO four-symptom screen for the detection of tuberculosis in outpatients (on ART)

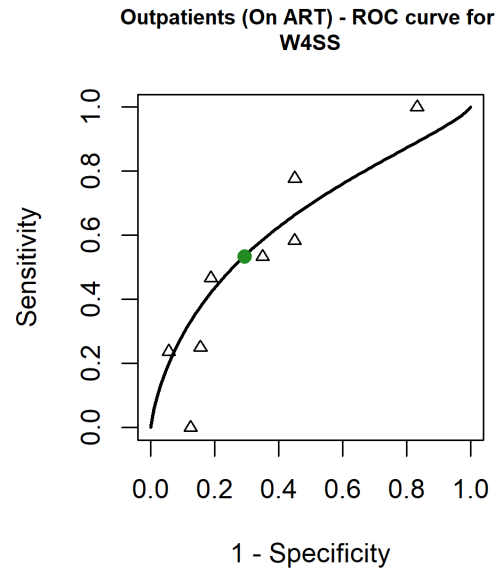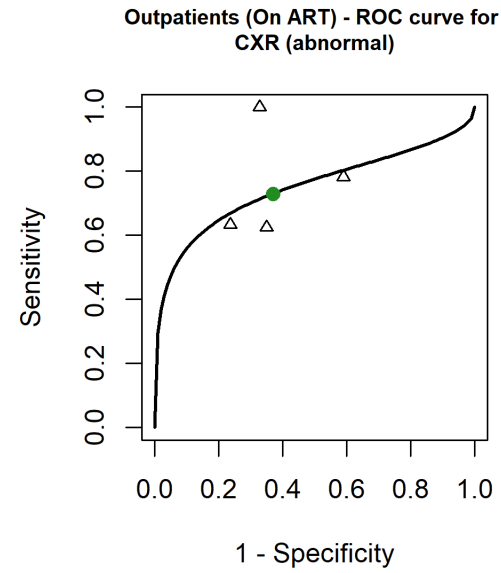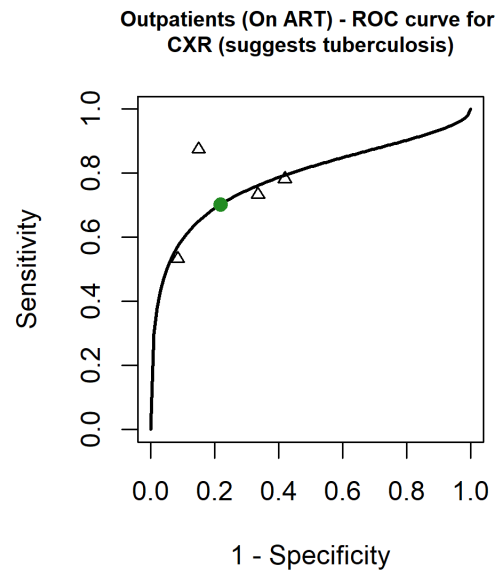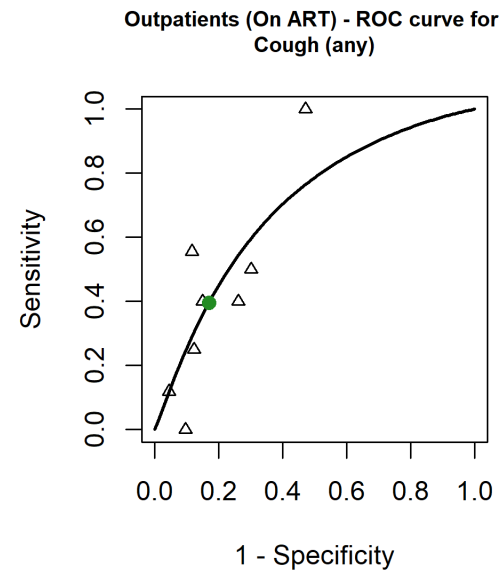



Outpatients (On ART) - ROC curve for Cough ( $\geq 2$  weeks)

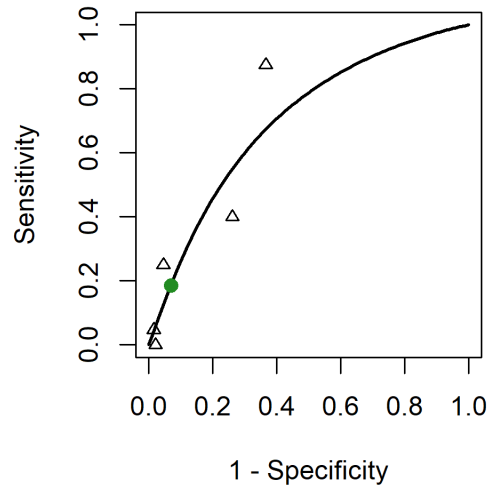

Outpatients (On ART) - ROC curve for Hb ( $<10$  g/dL)

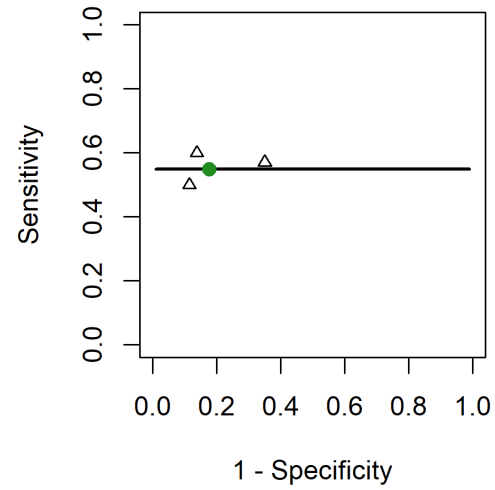

Outpatients (On ART) - ROC curve for Hb ( $<8$  g/dL)

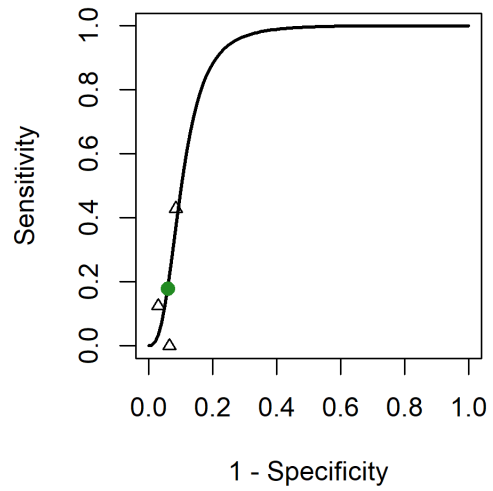

Outpatients (On ART) - ROC curve for BMI ( $<18.5$  kg/m<sup>2</sup>)

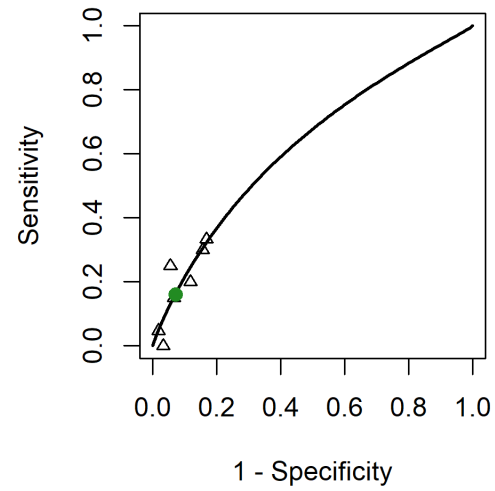

Outpatients (On ART) - ROC curve for W4SS with CXR (abnormal)

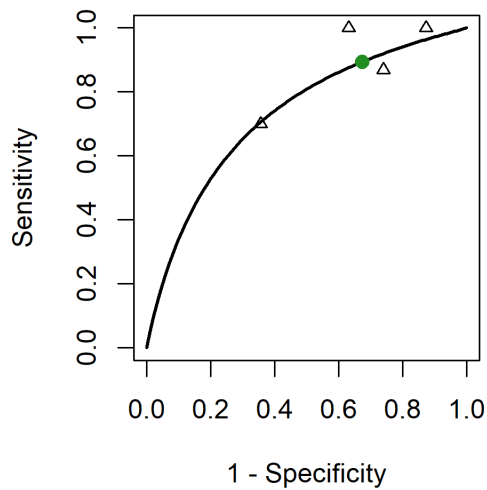

Outpatients (On ART) - ROC curve for W4SS then Xpert

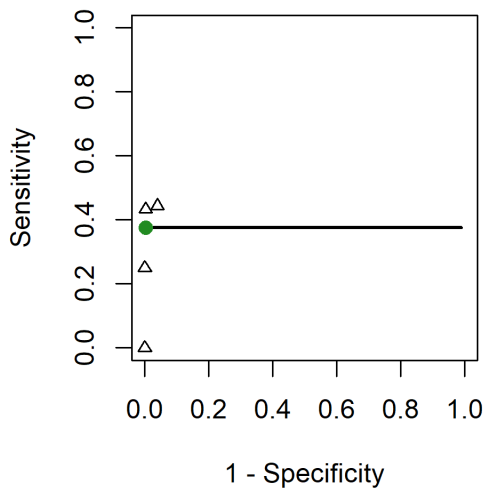

Outpatients (On ART) - ROC curve for Xpert alone

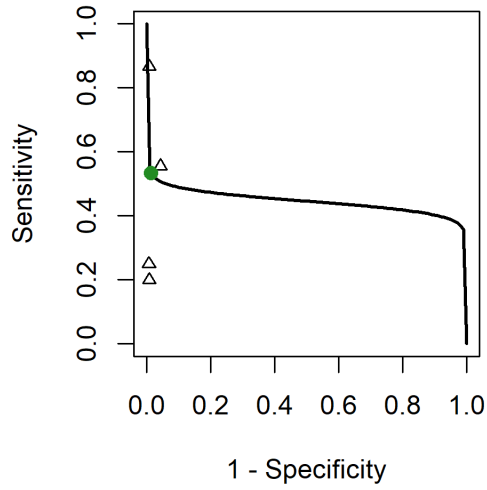

Figure S4C - Summary receiver operating characteristics curves comparing each test and WHO four-symptom screen for the detection of tuberculosis in outpatients (not on ART)

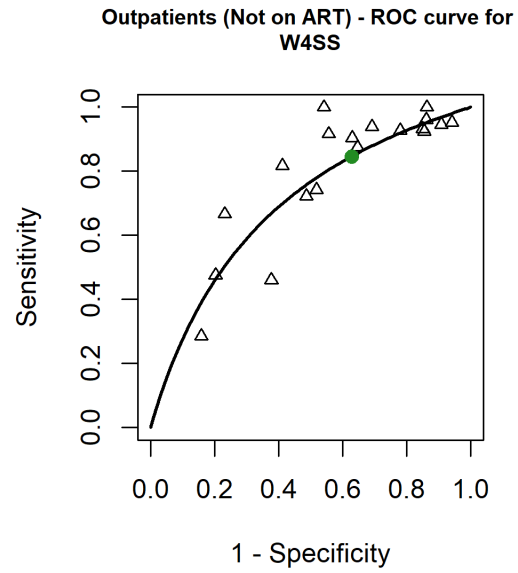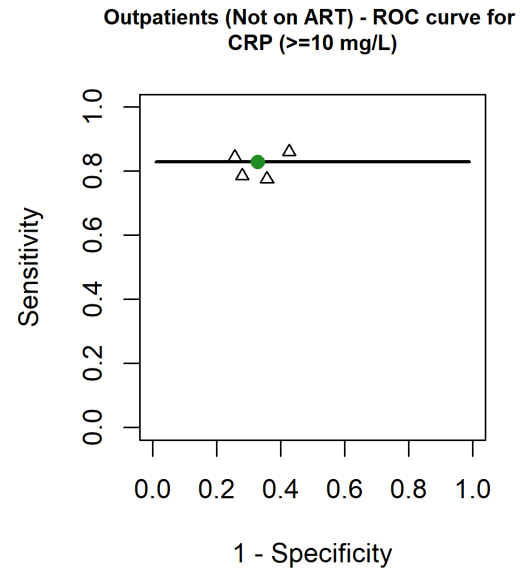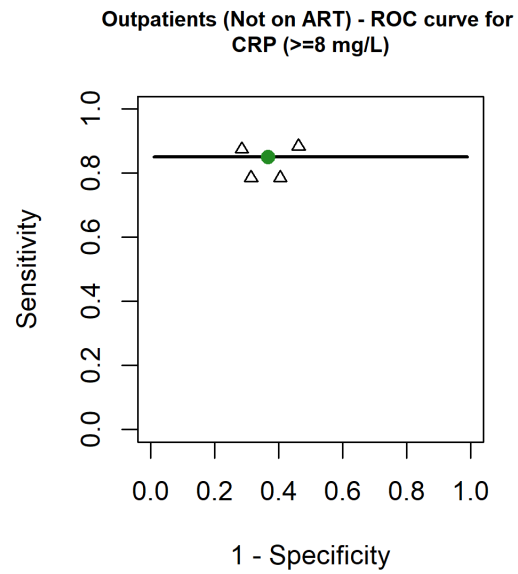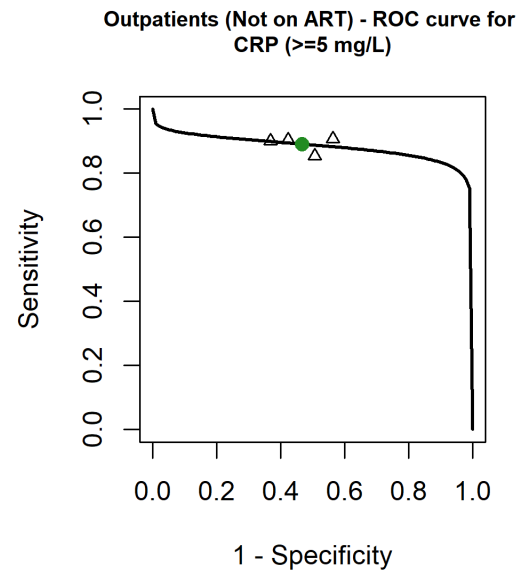

Outpatients (Not on ART) - ROC curve for CXR (abnormal)

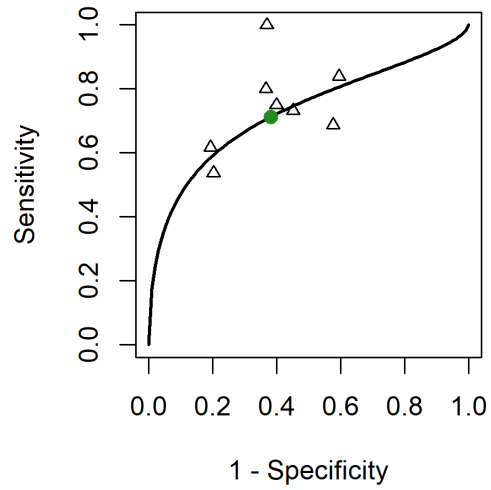

Outpatients (Not on ART) - ROC curve for CXR (suggests tuberculosis)

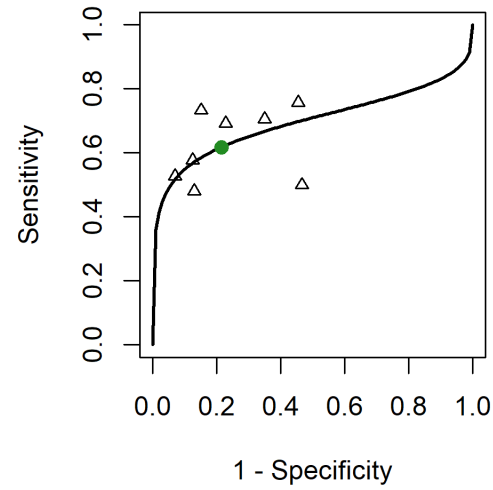

Outpatients (Not on ART) - ROC curve for Cough (any)

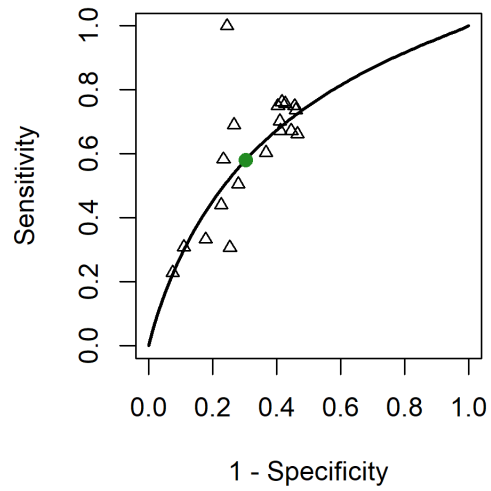

Outpatients (Not on ART) - ROC curve for Cough (>=2 weeks)

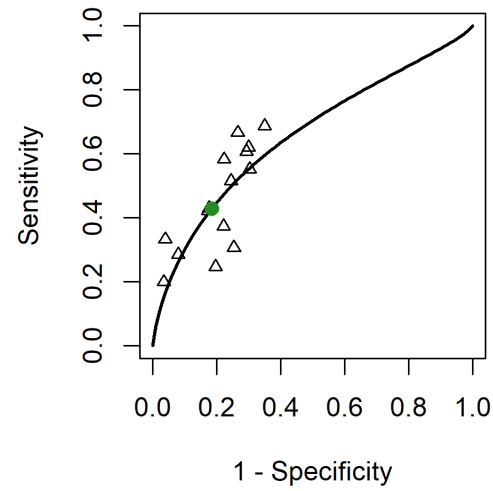

Outpatients (Not on ART) - ROC curve for Hb (<10 g/dL)

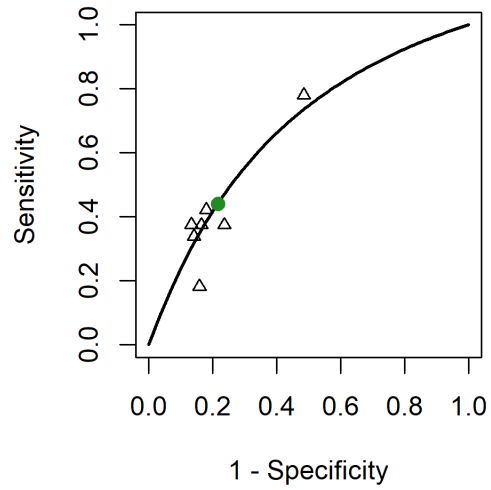

Outpatients (Not on ART) - ROC curve for Hb (<8 g/dL)

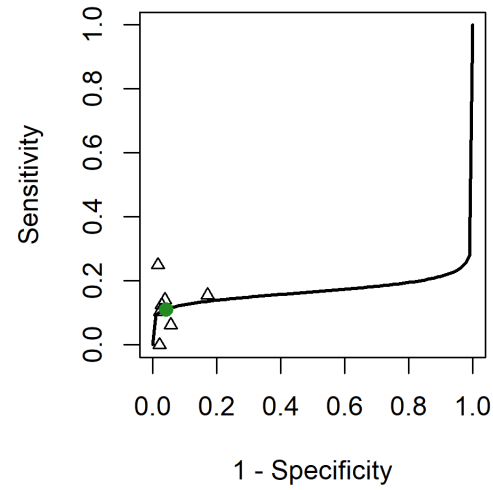

Outpatients (Not on ART) - ROC curve for BMI (<18.5 kg/m<sup>2</sup>)

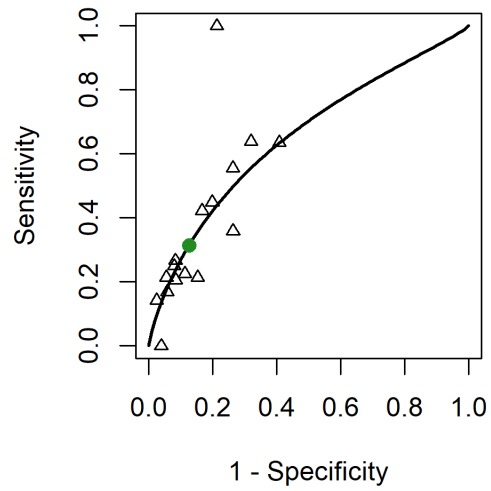

Outpatients (Not on ART) - ROC curve for Lymphadenopathy

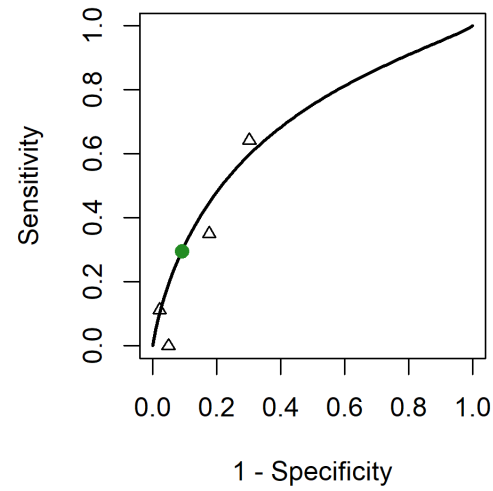

Outpatients (Not on ART) - ROC curve for W4SS with CRP ( $\geq 10$  mg/L)

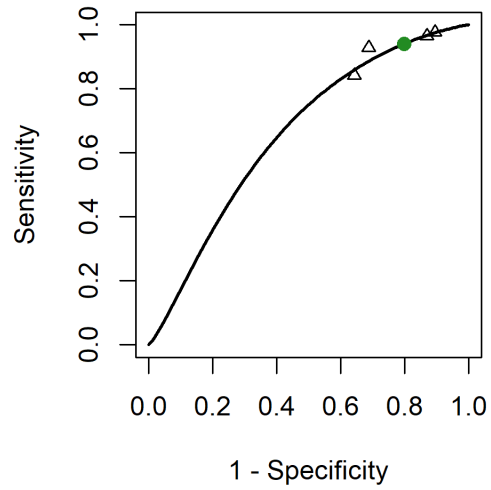

Outpatients (Not on ART) - ROC curve for W4SS with CXR (abnormal)

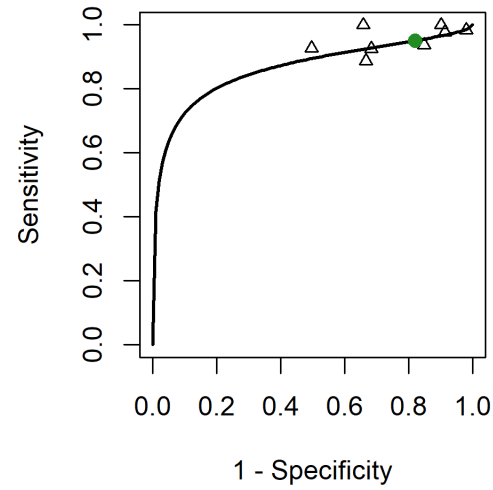

Outpatients (Not on ART) - ROC curve for W4SS then CRP ( $\geq 5$  mg/L)

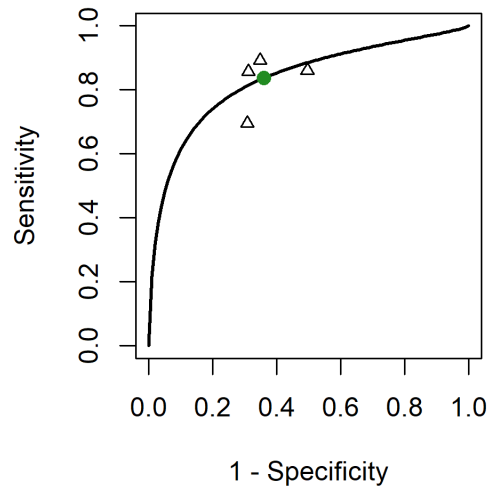

Outpatients (Not on ART) - ROC curve for W4SS then Xpert

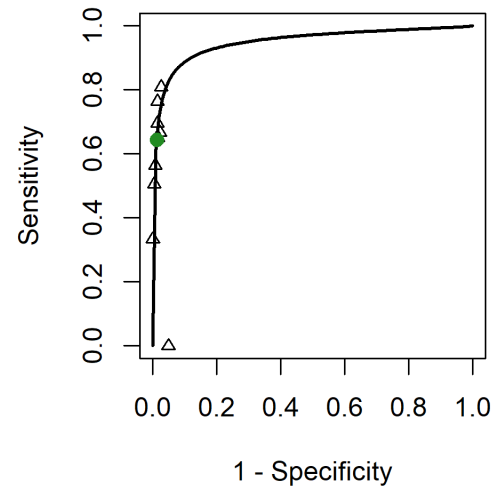

Outpatients (Not on ART) - ROC curve for Xpert alone

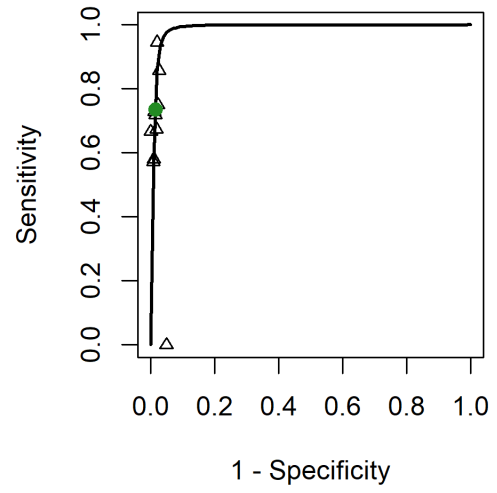

Figure S4D - Summary receiver operating characteristics curves comparing each test and WHO four-symptom screen for the detection of tuberculosis in participants with a CD4 cell count  $\leq 200$  cells/ $\mu\text{L}$

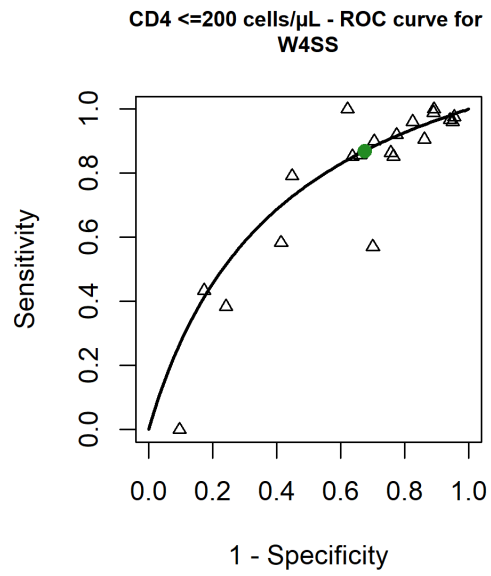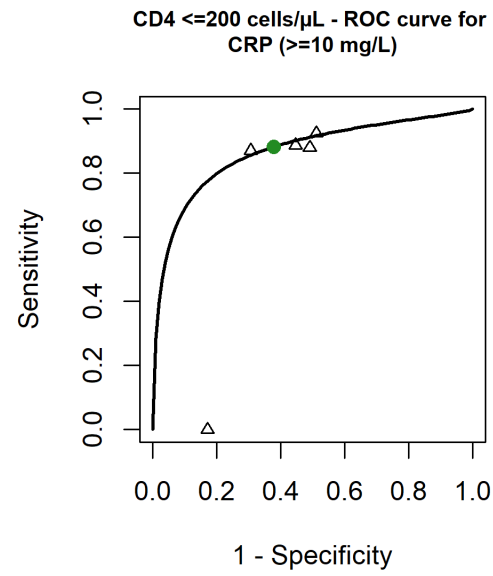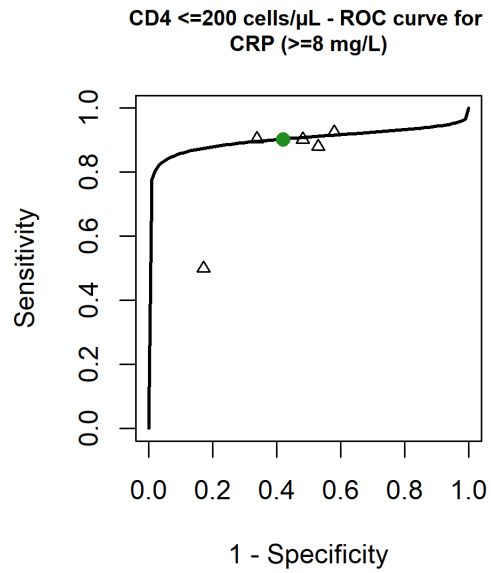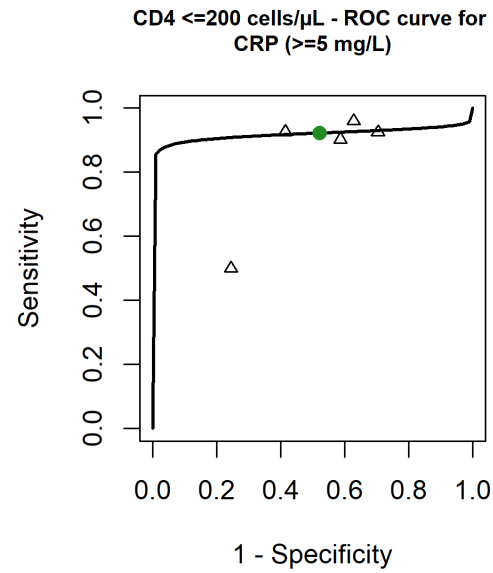



CD4  $\leq$ 200 cells/ $\mu$ L - ROC curve for CXR (abnormal)

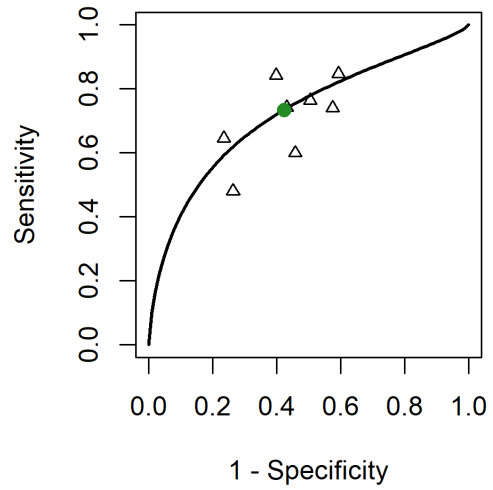

CD4  $\leq$ 200 cells/ $\mu$ L - ROC curve for CXR (suggests tuberculosis)

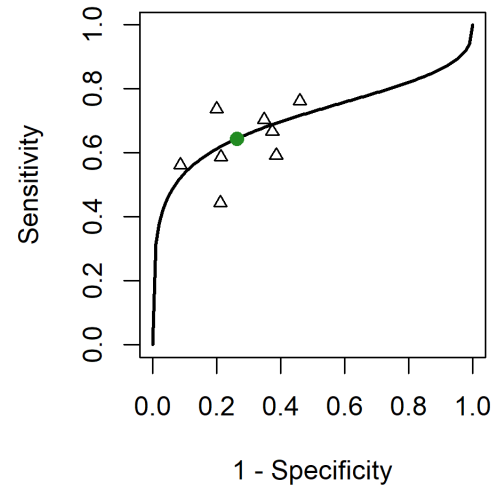

CD4  $\leq$ 200 cells/ $\mu$ L - ROC curve for Cough (any)

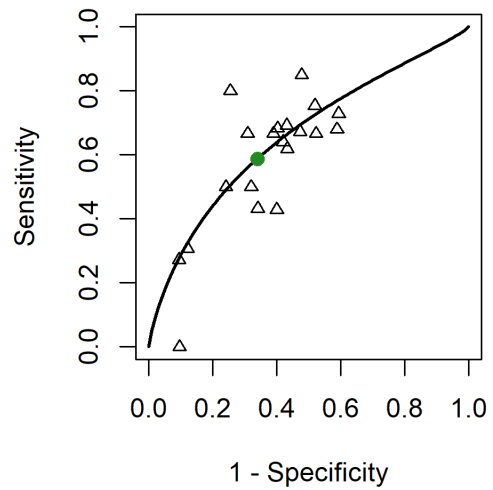

CD4  $\leq$ 200 cells/ $\mu$ L - ROC curve for Cough ( $\geq$ 2 weeks)

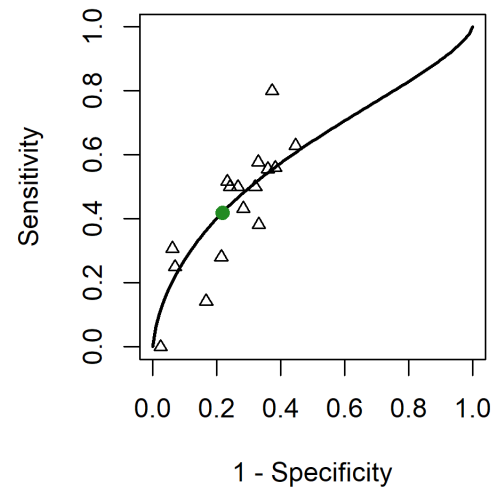

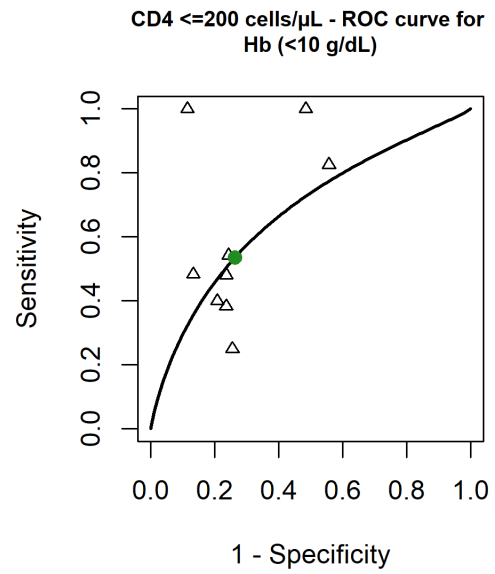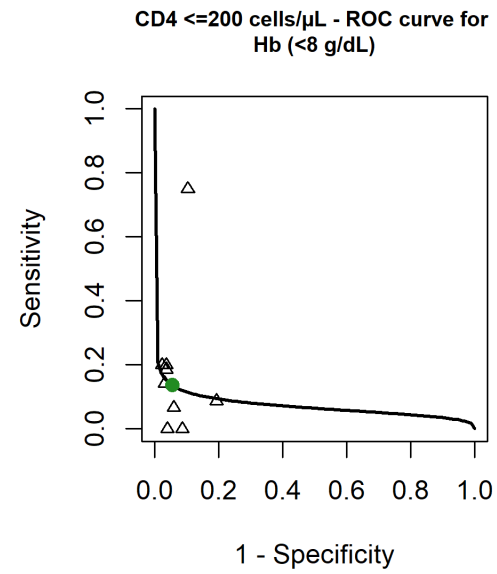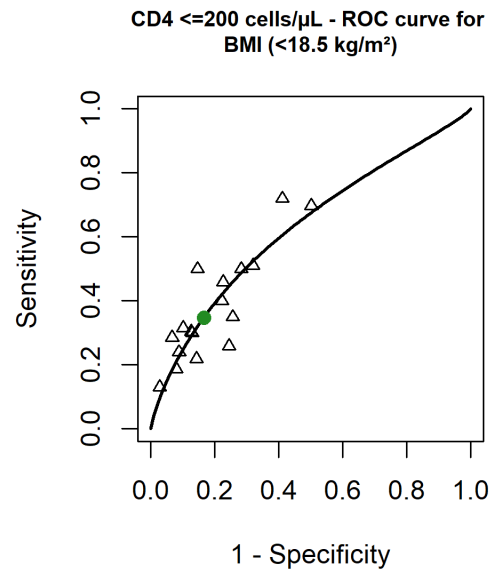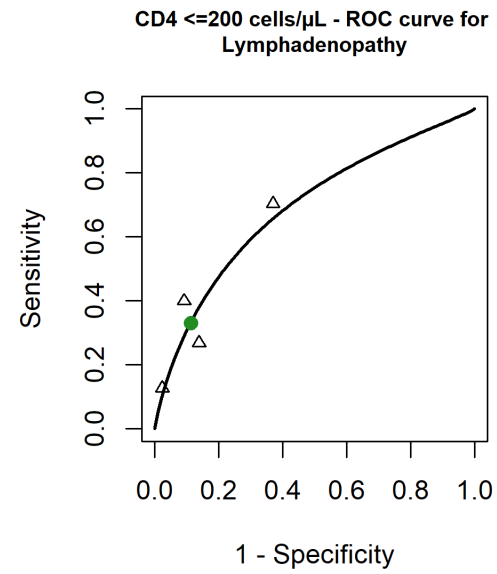

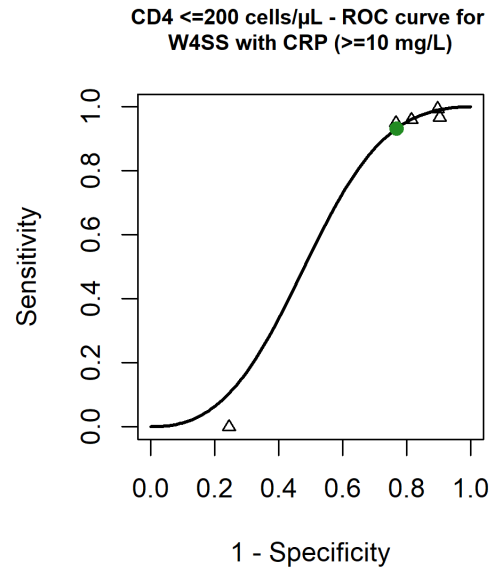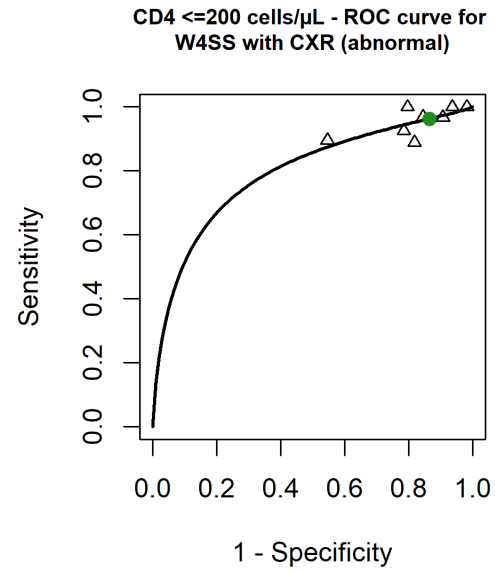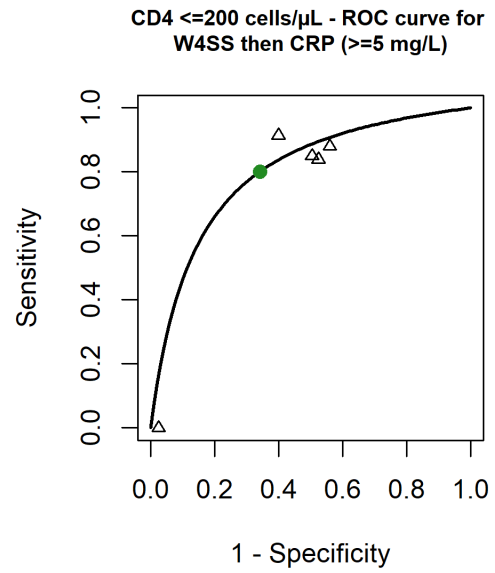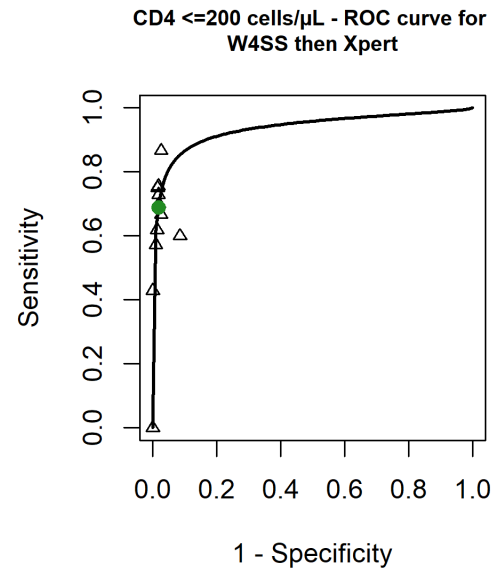

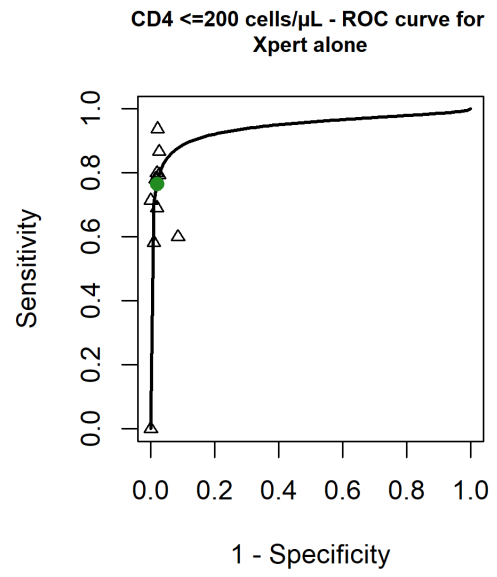

Figure S4E - Summary receiver operating characteristics curves comparing each test and WHO four-symptom screen for the detection of tuberculosis in in participants with a CD4 cell count >200 cells/ $\mu$ L

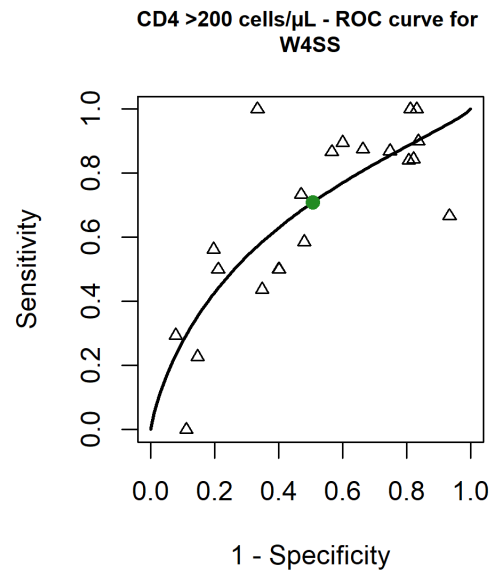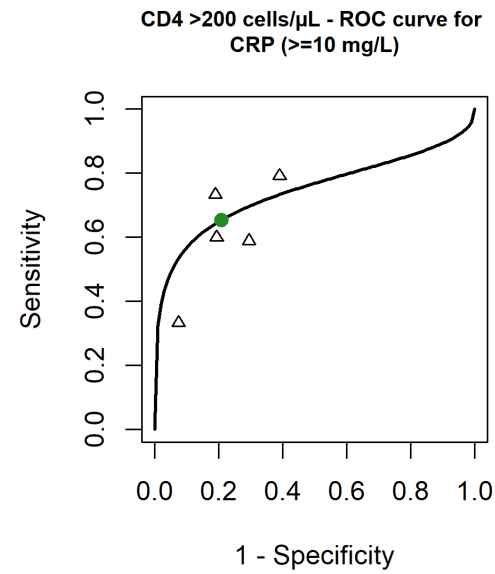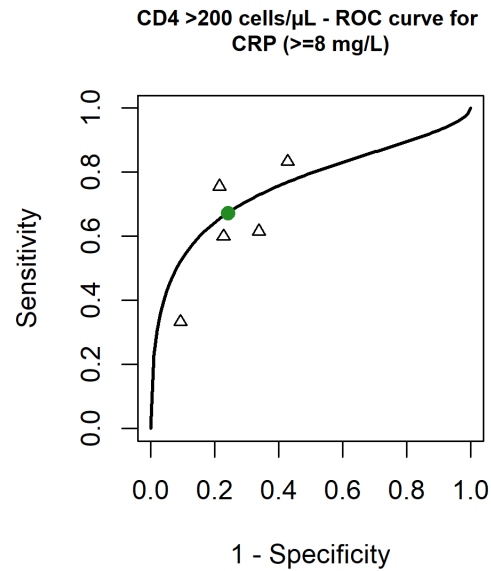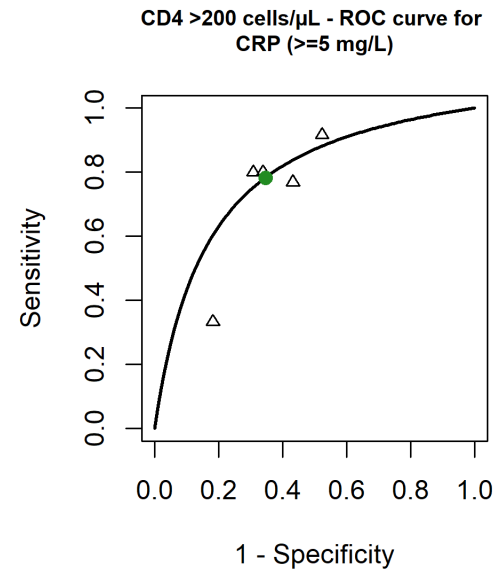

**CD4 >200 cells/ $\mu$ L - ROC curve for CXR (abnormal)**

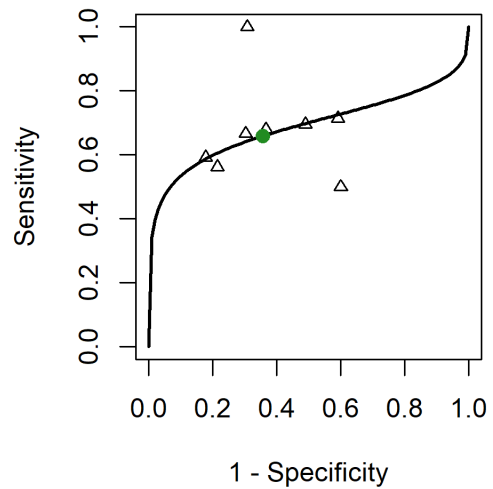

**CD4 >200 cells/ $\mu$ L - ROC curve for CXR (suggests tuberculosis)**

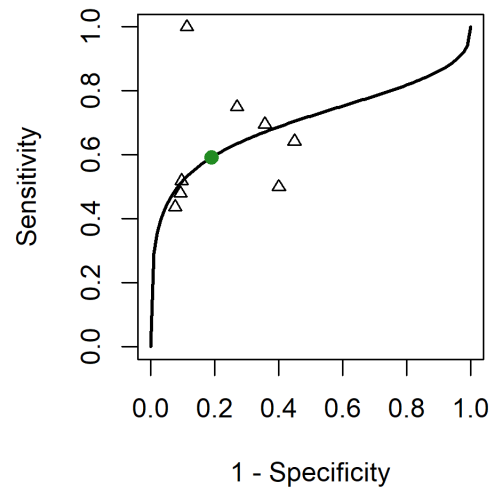

**CD4 >200 cells/ $\mu$ L - ROC curve for Cough (any)**

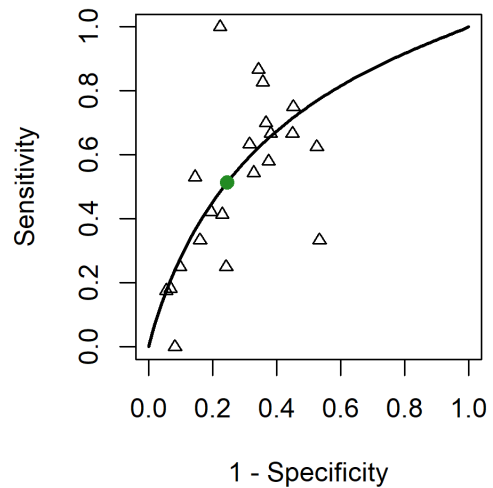

**CD4 >200 cells/ $\mu$ L - ROC curve for Cough ( $\geq$ 2 weeks)**

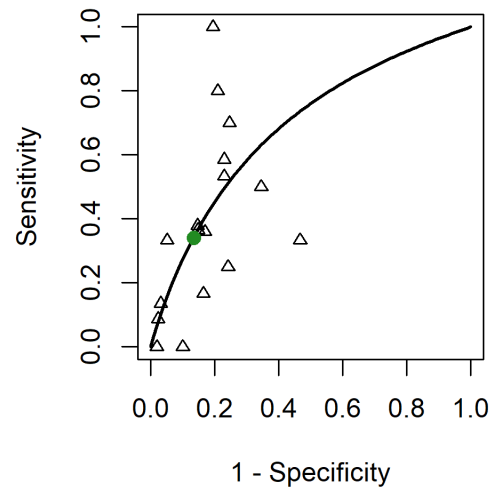

CD4 >200 cells/ $\mu$ L - ROC curve for Hb (<10 g/dL)

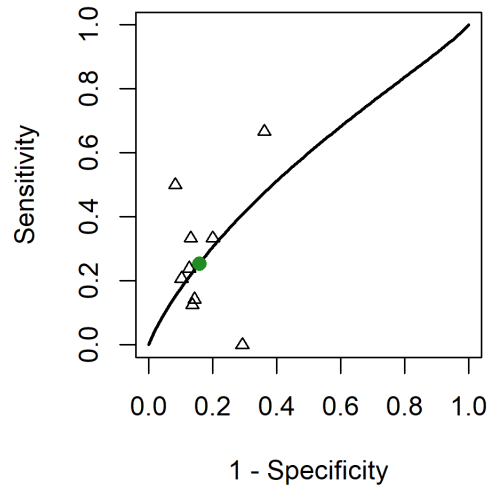

CD4 >200 cells/ $\mu$ L - ROC curve for Hb (<8 g/dL)

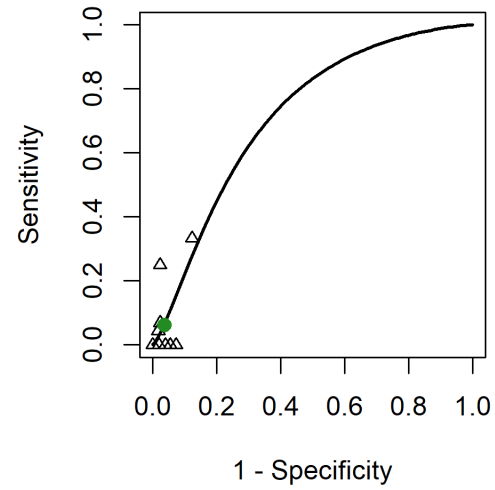

CD4 >200 cells/ $\mu$ L - ROC curve for BMI (<18.5 kg/m<sup>2</sup>)

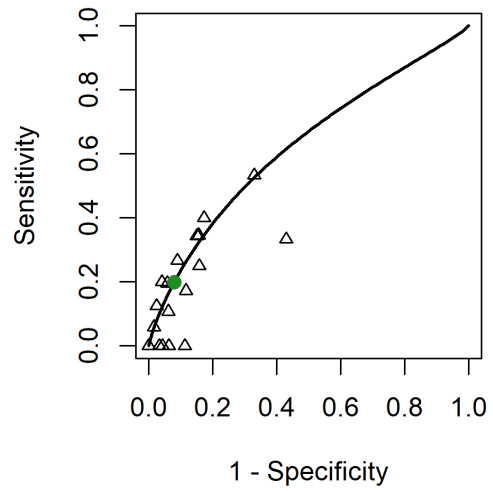

CD4 >200 cells/ $\mu$ L - ROC curve for Lymphadenopathy

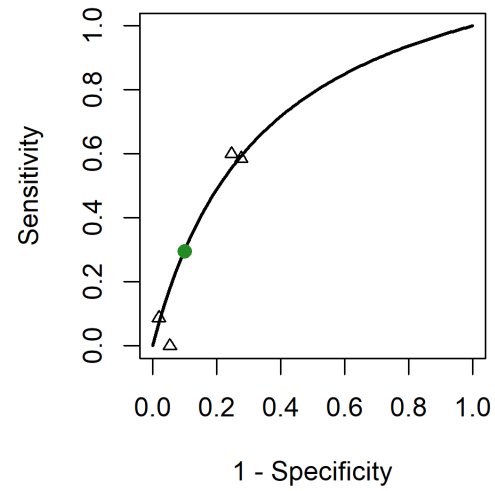

CD4 >200 cells/ $\mu$ L - ROC curve for W4SS with CRP ( $\geq 10$  mg/L)

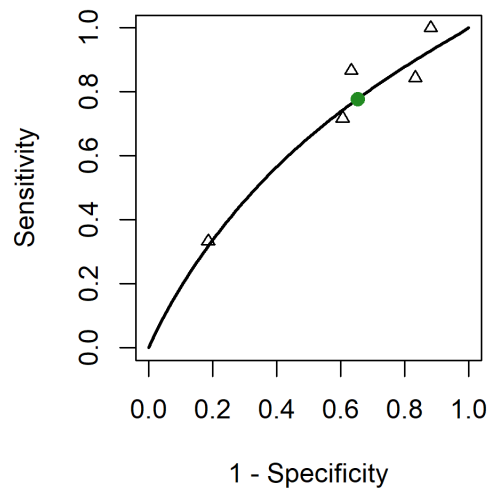

CD4 >200 cells/ $\mu$ L - ROC curve for W4SS with CXR (abnormal)

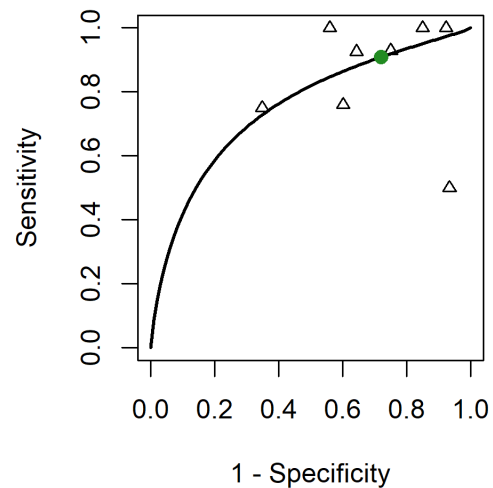

CD4 >200 cells/ $\mu$ L - ROC curve for W4SS then CRP ( $\geq 5$  mg/L)

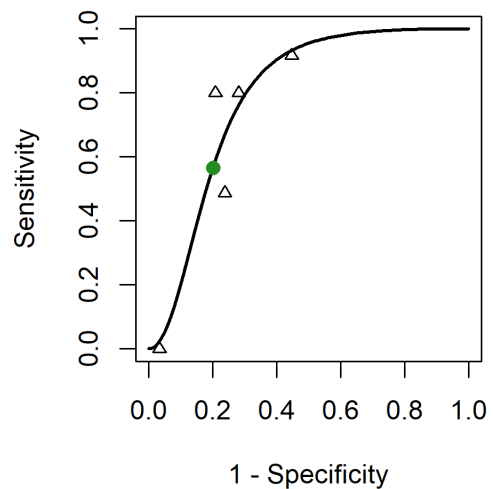

CD4 >200 cells/ $\mu$ L - ROC curve for W4SS then Xpert

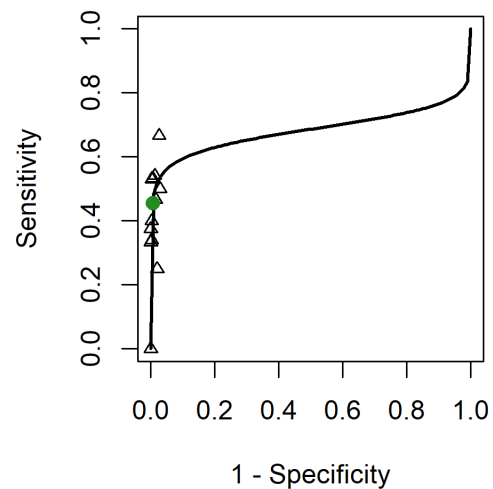



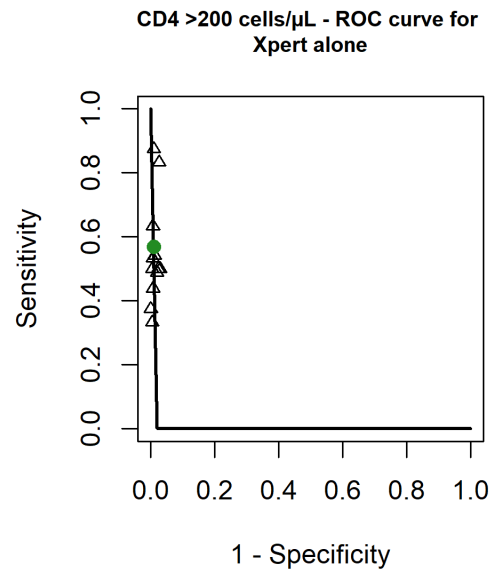

Figure S4F - Summary receiver operating characteristics curves comparing each test and WHO four-symptom screen for the detection of tuberculosis in pregnant participants

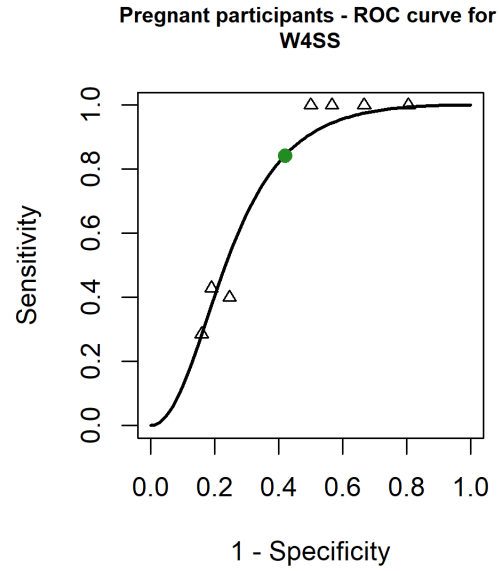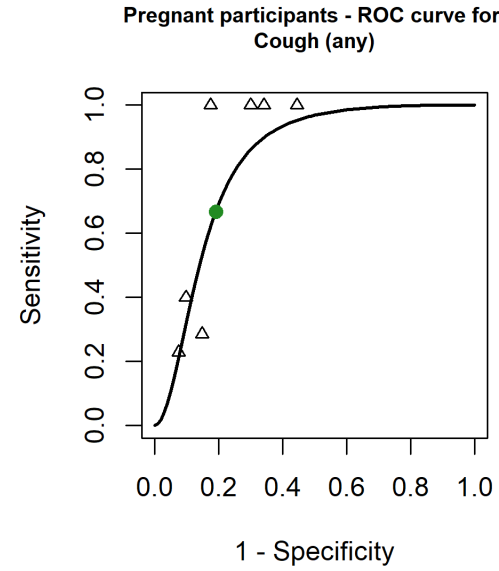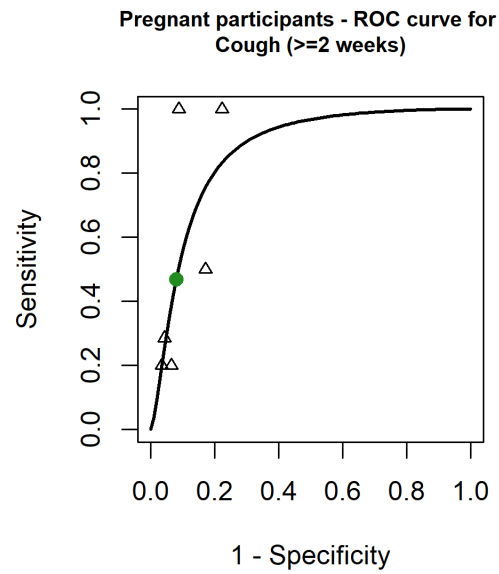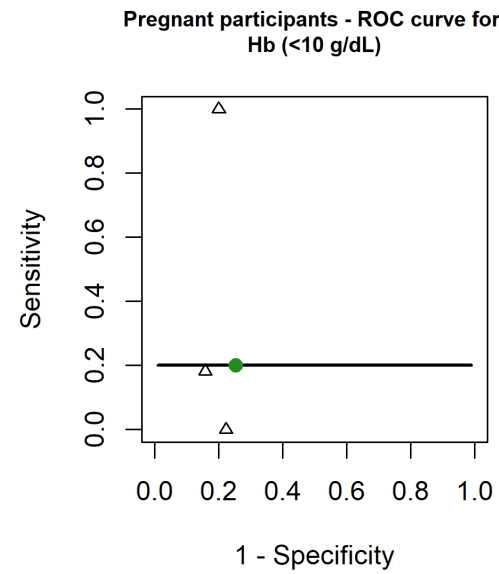

Pregnant participants - ROC curve for Hb (<8 g/dL)

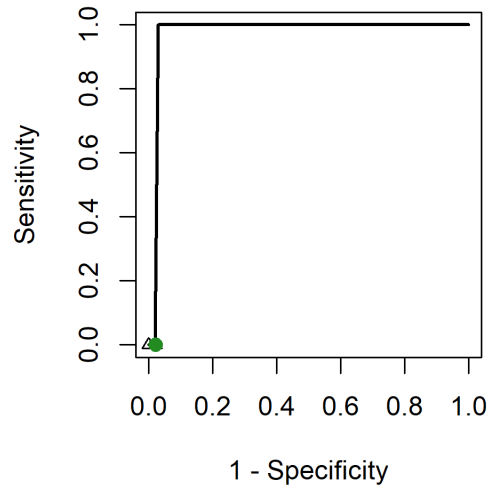

Pregnant participants - ROC curve for BMI (<18.5 kg/m<sup>2</sup>)

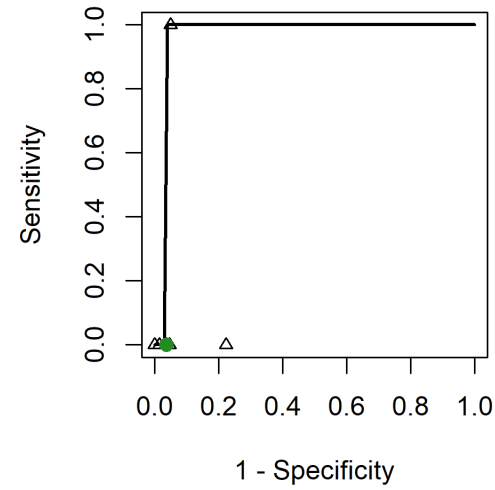

Pregnant participants - ROC curve for W4SS then Xpert

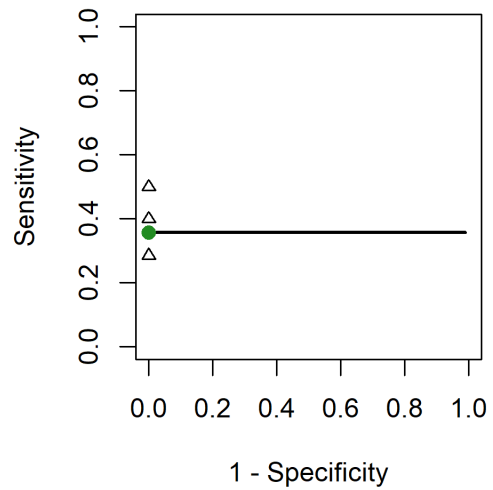

Pregnant participants - ROC curve for Xpert alone

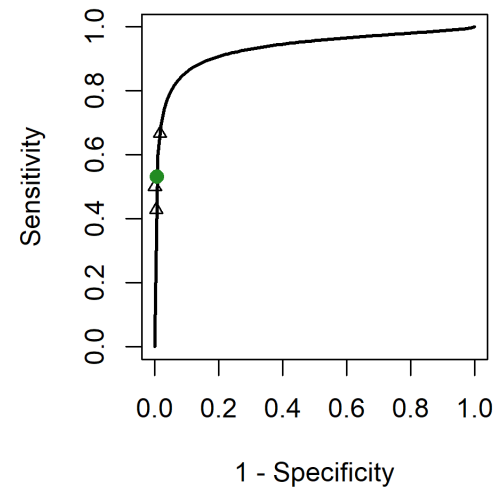

**Figure S5 - Funnel plots (for tests/strategies with  $\geq 10$  studies available)**

Figure S5A - Funnel plots in all participants

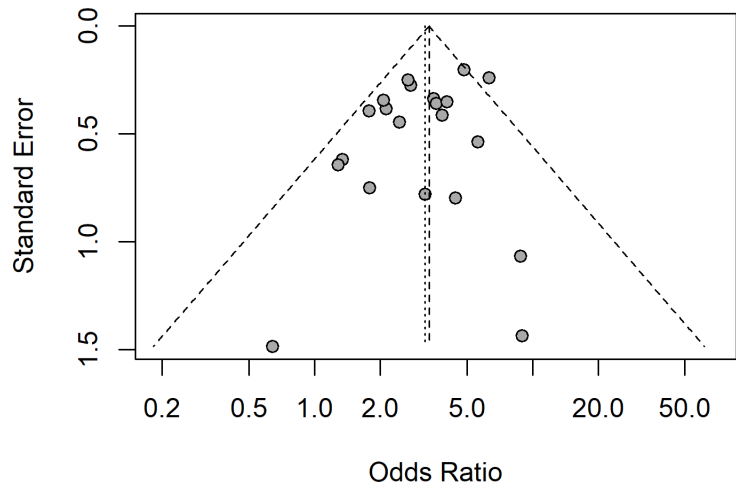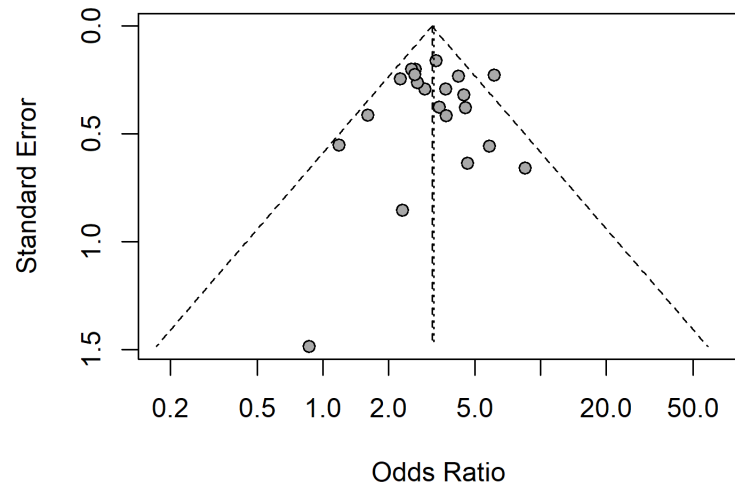

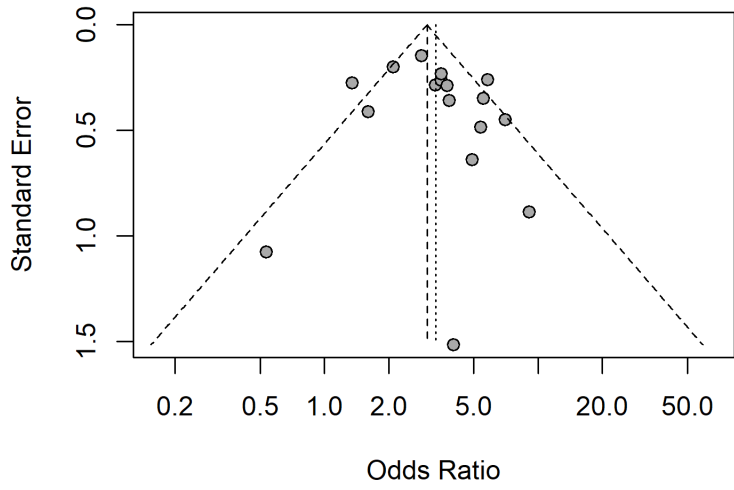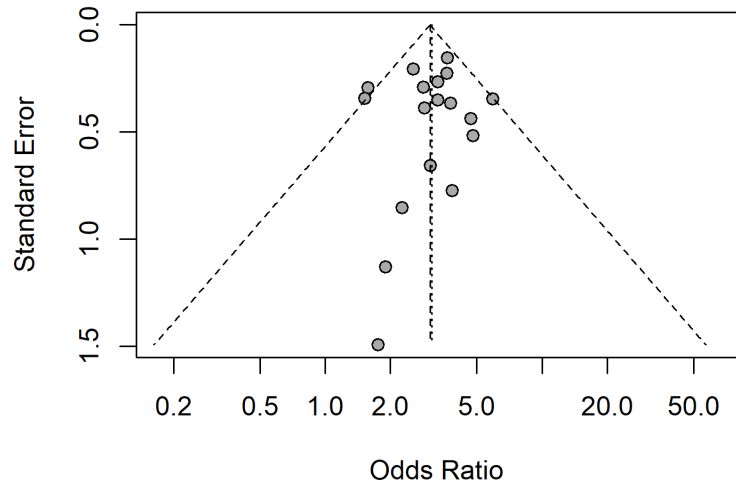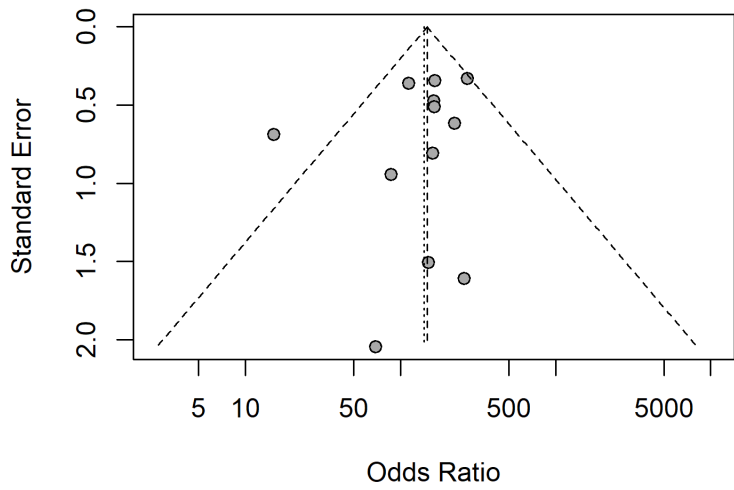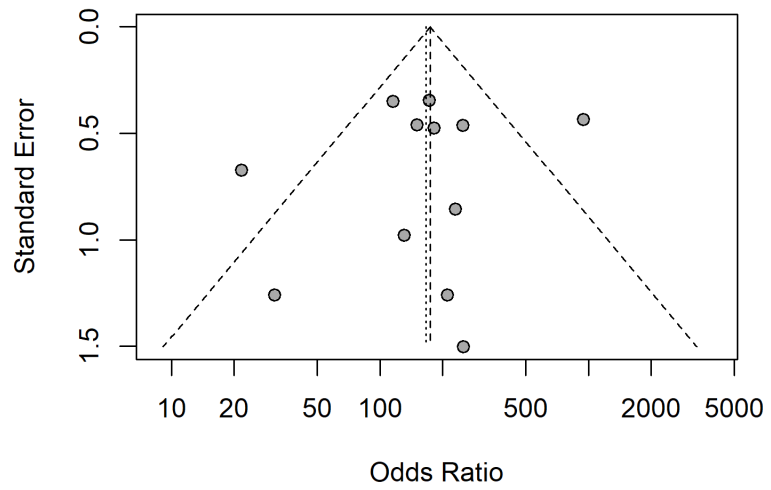

Figure S5B - Funnel plots in outpatients (on ART)  
Figure S5C - Funnel plots in outpatients (not on ART)

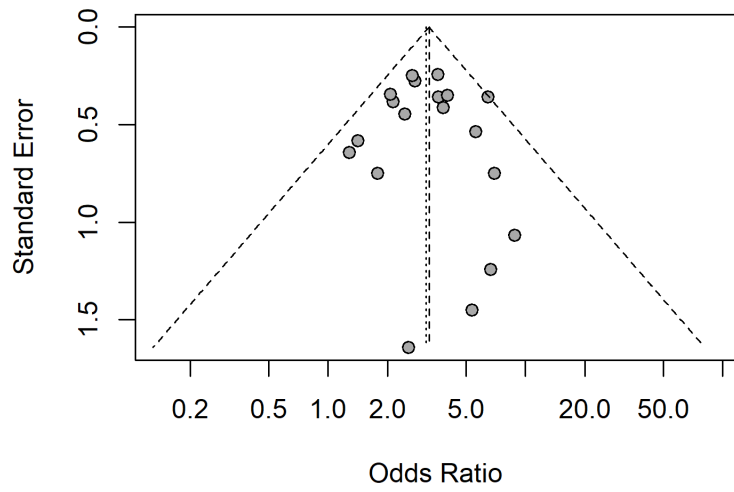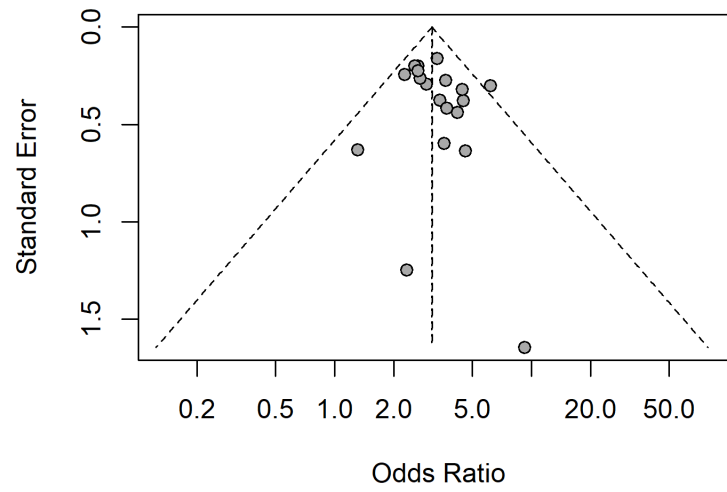

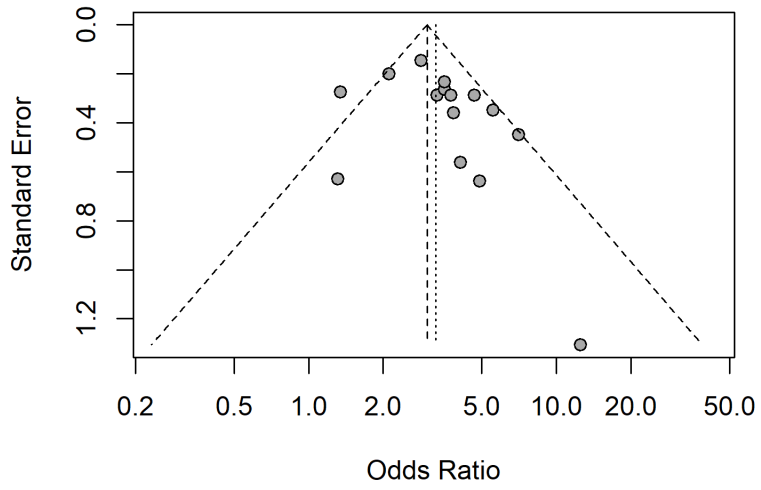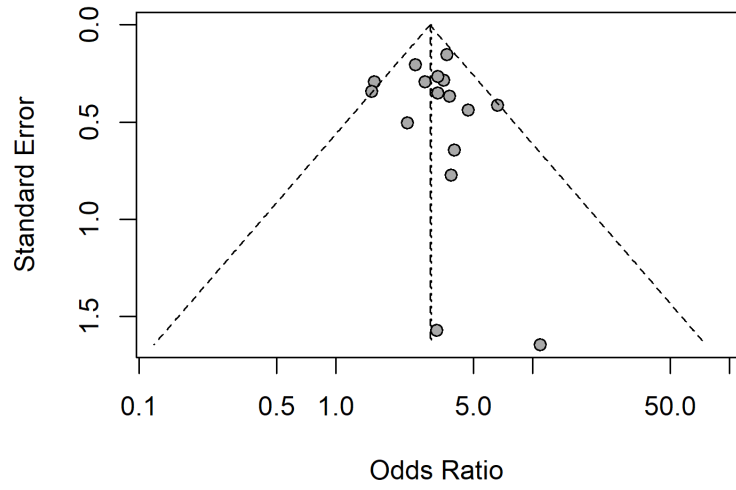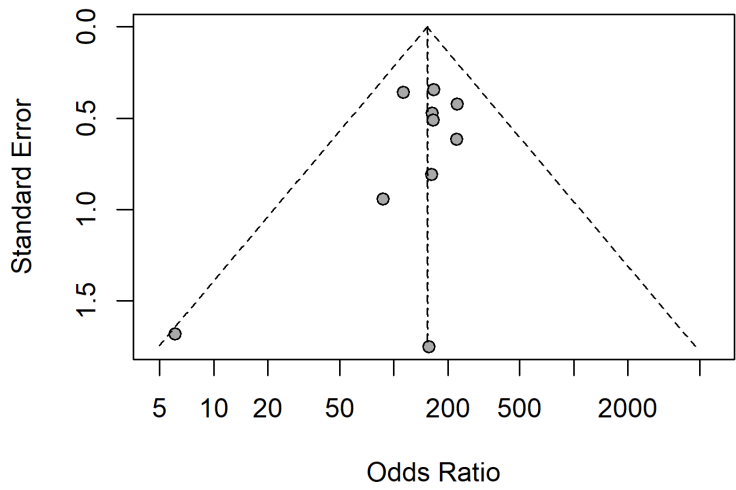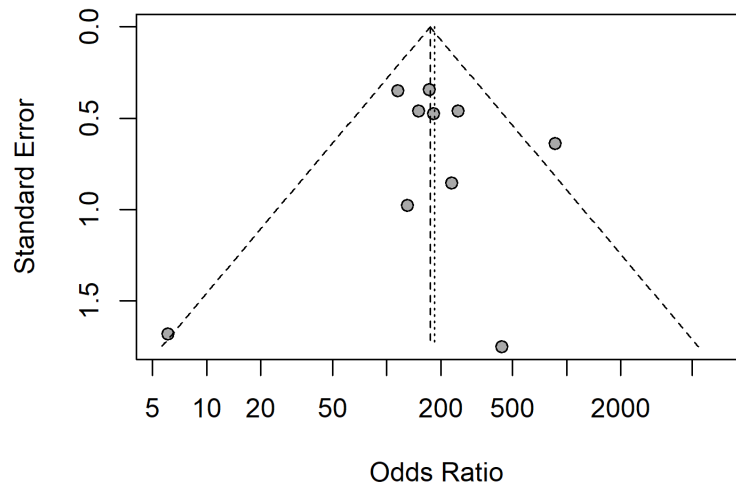

Figure S5D - Funnel plots in participants with a CD4 cell count  $\leq 200$  cells/ $\mu$ L

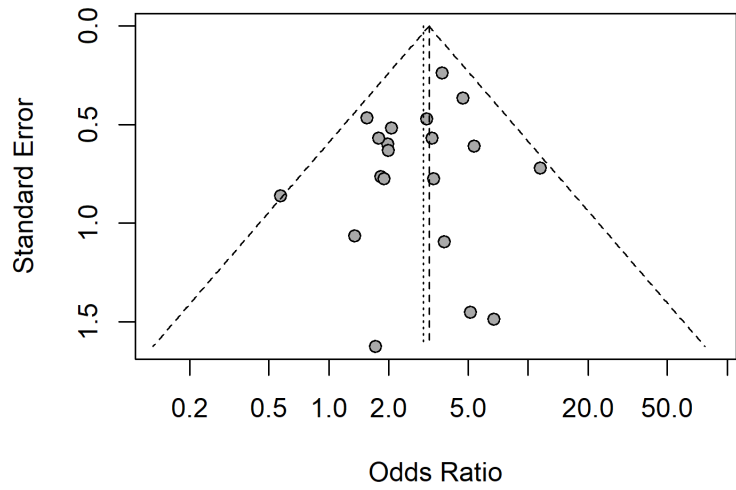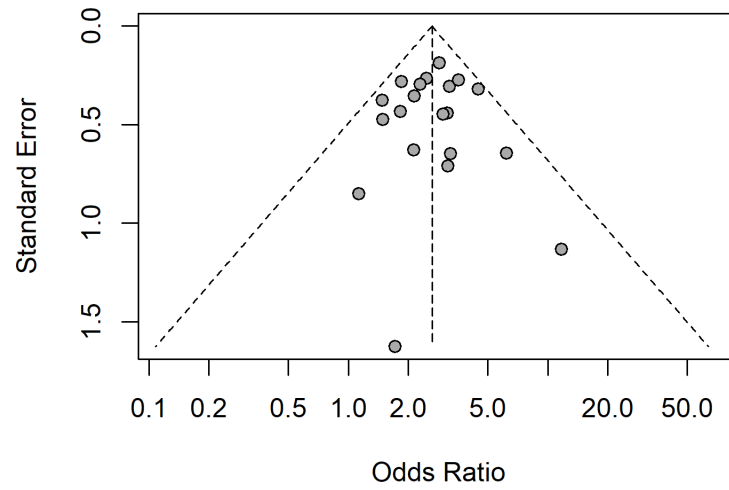



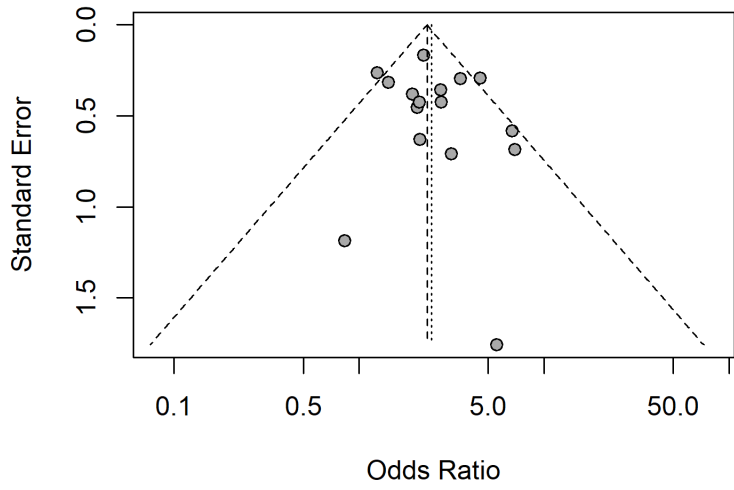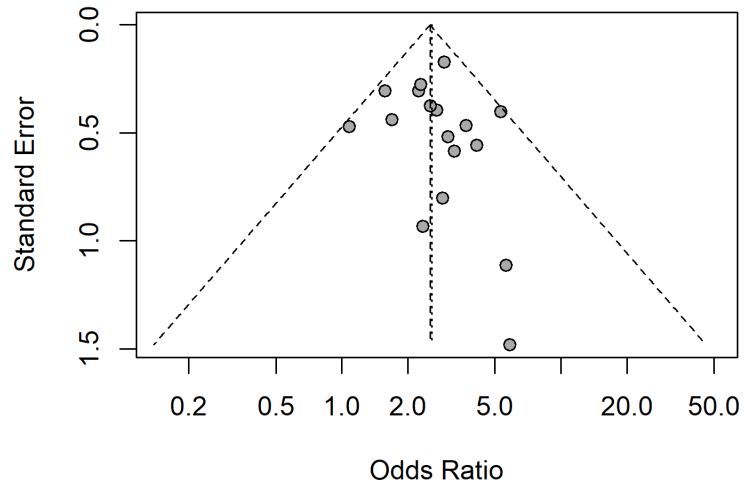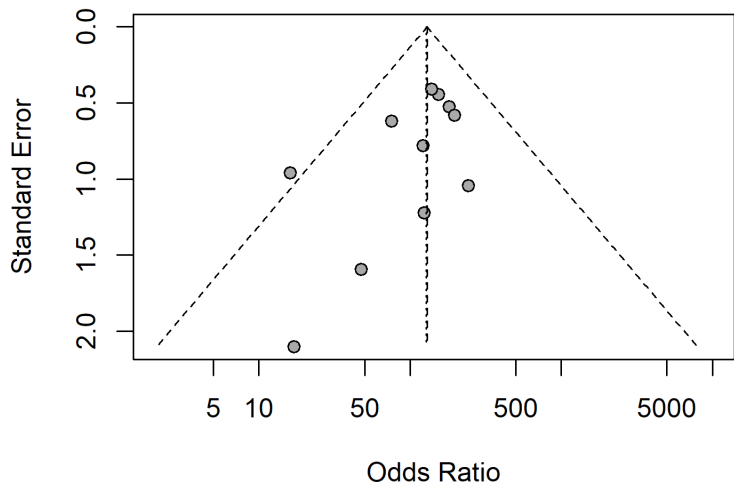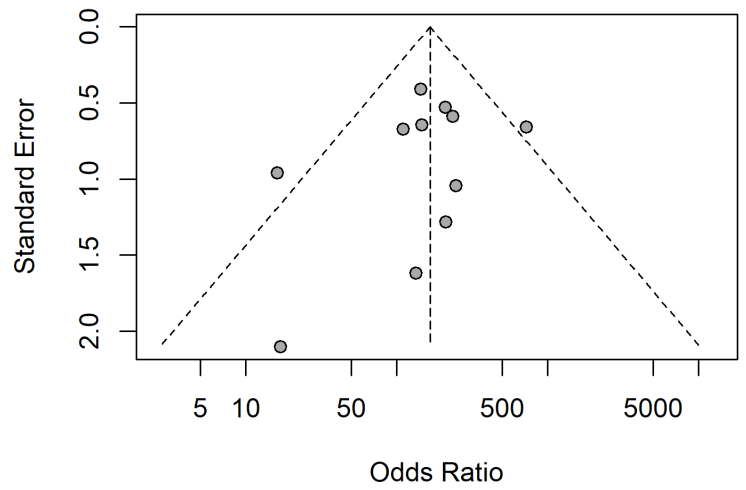

Figure S5E - Funnel plots in participants with a CD4 cell count >200 cells/ $\mu$ L

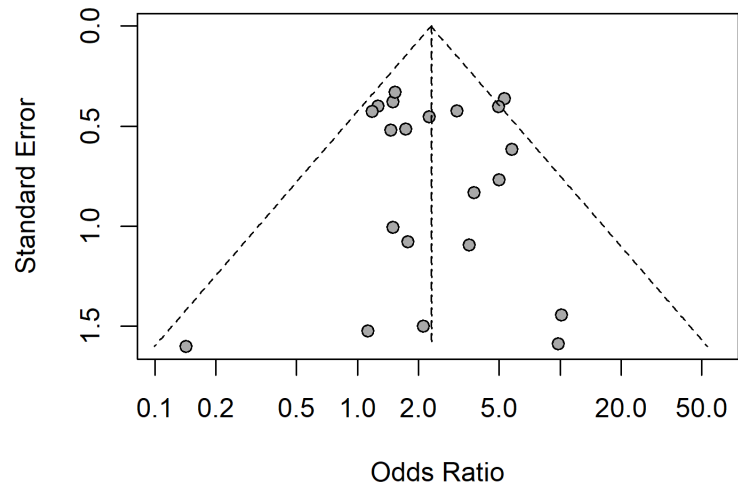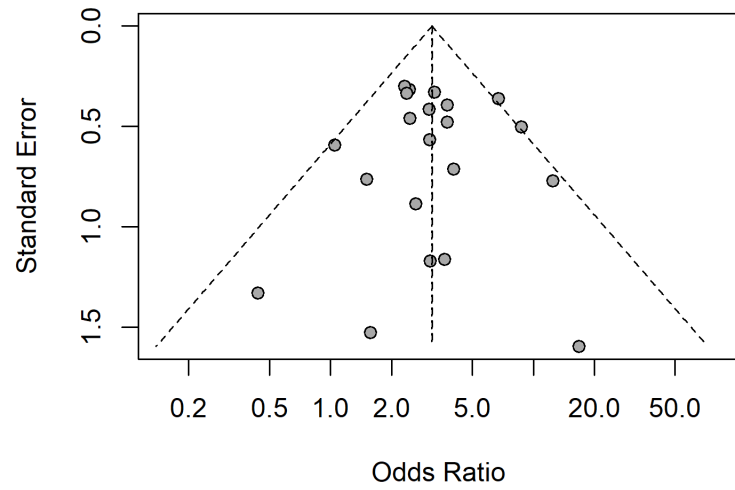

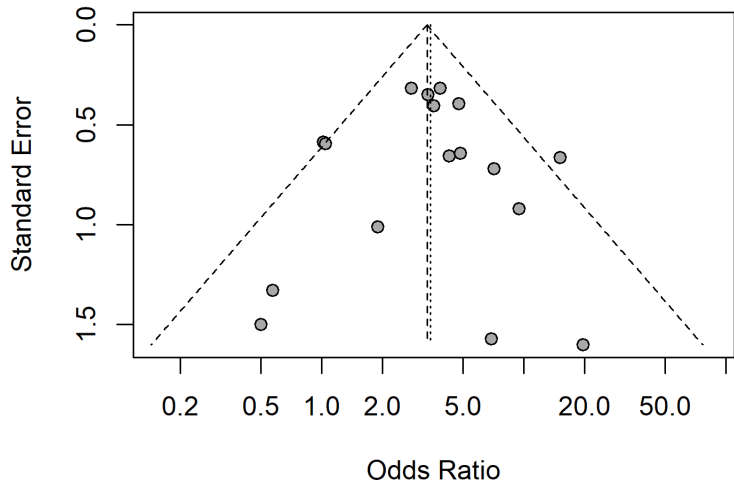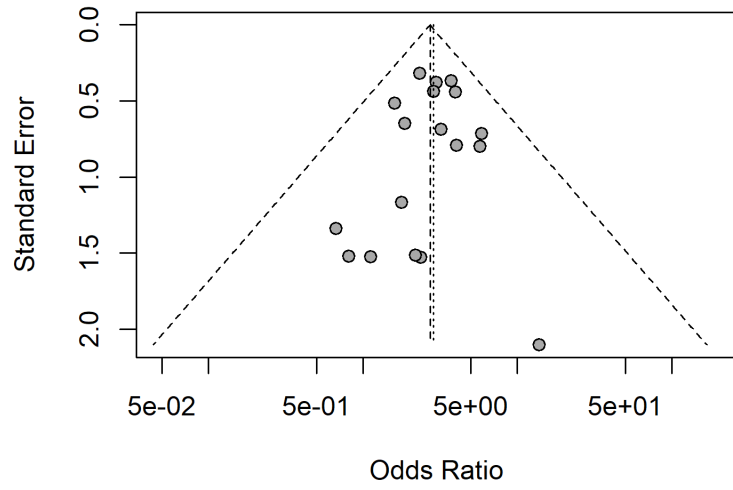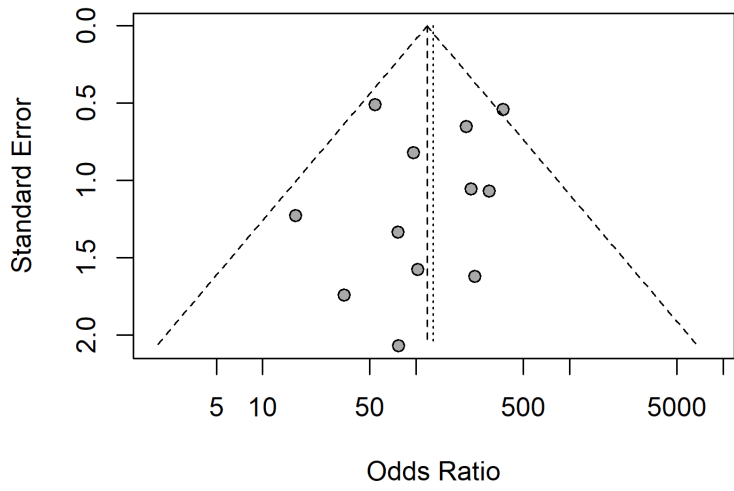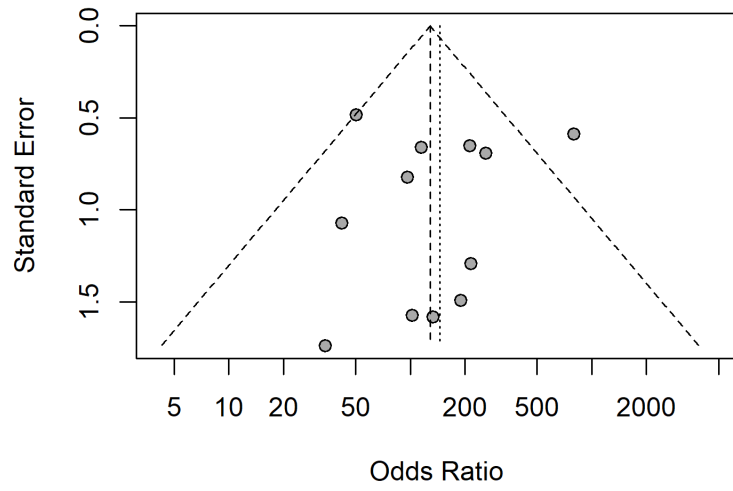

## References

1. Al-Darraj HA, Abd Razak H, Ng KP, Altice FL, Kamarulzaman A. The diagnostic performance of a single GeneXpert MTB/RIF assay in an intensified tuberculosis case finding survey among HIV-infected prisoners in Malaysia. *PLoS One* 2013; **8**(9): e73717.
2. Affolabi D, Wachinou AP, Bekou W, et al. Screening tuberculosis in HIV infected patients: which algorithms work best? A multicountry survey in Benin, Guinea and Senegal (RAFAscreen project). 49th World Conference On Lung Health Of The International Union Against Tuberculosis And Lung Disease. The Hague, The Netherlands; 24–27 October, 2018.
3. Ahmad Khan F, Verkuil S, Parrish A, et al. Performance of symptom-based tuberculosis screening among people living with HIV: not as great as hoped. *AIDS (London, England)* 2014; **28**(10): 1463-72.
4. Balcha TT, Skogmar S, Sturegard E, et al. A Clinical Scoring Algorithm for Determination of the Risk of Tuberculosis in HIV-Infected Adults: A Cohort Study Performed at Ethiopian Health Centers. *Open Forum Infect Dis* 2014; **1**(3): ofu095.
5. Bjerrum S, Kenu E, Lartey M, et al. Diagnostic accuracy of the rapid urine lipoarabinomannan test for pulmonary tuberculosis among HIV-infected adults in Ghana-findings from the DETECT HIV-TB study. *BMC Infect Dis* 2015; **15**: 407.
6. Gersh JK, Barnabas RV, Matemo D, et al. Pulmonary tuberculosis screening in anti-retroviral treated adults living with HIV in Kenya. *BMC Infect Dis* 2021; **21**(1): 218.
7. Hanifa Y, Fielding KL, Charalambous S, et al. Tuberculosis among adults starting antiretroviral therapy in South Africa: the need for routine case finding. *The international journal of tuberculosis and lung disease : the official journal of the International Union against Tuberculosis and Lung Disease* 2012; **16**(9): 1252-9.
8. Heidebrecht CL, Podewils LJ, Pym AS, Cohen T, Mthiyane T, Wilson D. Assessing the utility of Xpert((R)) MTB/RIF as a screening tool for patients admitted to medical wards in South Africa. *Scientific reports* 2016; **6**: 19391.
9. Hoffmann CJ, Variava E, Rakgokong M, et al. High prevalence of pulmonary tuberculosis but low sensitivity of symptom screening among HIV-infected pregnant women in South Africa. *PLoS One* 2013; **8**(4): e62211.
10. Kempker RR, Chkhartishvili N, Kinkladze I, et al. High Yield of Active Tuberculosis Case Finding Among HIV-Infected Patients Using Xpert MTB/RIF Testing. *Open Forum Infect Dis* 2019; **6**(6): ofz233.
11. Kerkhoff AD, Wood R, Lowe DM, Vogt M, Lawn SD. Blood neutrophil counts in HIV-infected patients with pulmonary tuberculosis: association with sputum mycobacterial load. *PLoS One* 2013; **8**(7): e67956.
12. Kufa T, Mngomezulu V, Charalambous S, et al. Undiagnosed tuberculosis among HIV clinic attendees: association with antiretroviral therapy and implications for intensified case finding, isoniazid preventive therapy, and infection control. *J Acquir Immune Defic Syndr* 2012; **60**(2): e22-8.
13. LaCourse SM, Cranmer LM, Matemo D, et al. Tuberculosis Case Finding in HIV-Infected Pregnant Women in Kenya Reveals Poor Performance of Symptom Screening and Rapid Diagnostic Tests. *J Acquir Immune Defic Syndr* 2016; **71**(2): 219-27.
14. Mbu ET, Sauter F, Zoufaly A, et al. Tuberculosis in people newly diagnosed with HIV at a large HIV care and treatment center in Northwest Cameroon: Burden, comparative screening and diagnostic yields, and patient outcomes. *PLoS One* 2018; **13**(6): e0199634.
15. Modi S, Cavanaugh JS, Shiraiishi RW, et al. Performance of Clinical Screening Algorithms for Tuberculosis Intensified Case Finding among People Living with HIV in Western Kenya. *PLoS One* 2016; **11**(12): e0167685.
16. Nguyen DT, Bang ND, Hung NQ, Beasley RP, Hwang LY, Graviss EA. Yield of chest radiograph in tuberculosis screening for HIV-infected persons at a district-level HIV clinic. *The international journal of tuberculosis and lung disease : the official journal of the International Union against Tuberculosis and Lung Disease* 2016; **20**(2): 211-7.
17. Rangaka MX, Wilkinson RJ, Glynn JR, et al. Effect of antiretroviral therapy on the diagnostic accuracy of symptom screening for intensified tuberculosis case finding in a South African HIV clinic. *Clinical infectious diseases : an official publication of the Infectious Diseases Society of America* 2012; **55**(12): 1698-706.
18. Reeve B, Ndlangalavu G, Palmer Z, et al. Accuracy of Xpert Ultra and Xpert MTB/RIF in people living with HIV initiating antiretroviral treatment who have minimal TB symptoms. 50th World Conference On Lung Health Of The International Union Against Tuberculosis And Lung Disease. Hyderabad, India; Oct 30–Nov 2, 2019. p. S115.
19. Shapiro AE, Hong T, Govere S, et al. C-reactive protein as a screening test for HIV-associated pulmonary tuberculosis prior to antiretroviral therapy in South Africa. *AIDS (London, England)* 2018; **32**(13): 1811-20.
20. Swindells S, Komarow L, Tripathy S, et al. Screening for pulmonary tuberculosis in HIV-infected individuals: AIDS Clinical Trials Group Protocol A5253. *The international journal of tuberculosis and lung disease : the official journal of the International Union against Tuberculosis and Lung Disease* 2013; **17**(4): 532-9.
21. Thit SS, Aung NM, Htet ZW, et al. The clinical utility of the urine-based lateral flow lipoarabinomannan assay in HIV-infected adults in Myanmar: an observational study. *BMC Med* 2017; **15**(1): 145.
22. Yoon C, Semitala FC, Atuhumuza E, et al. Point-of-care C-reactive protein-based tuberculosis screening for people living with HIV: a diagnostic accuracy study. *Lancet Infect Dis* 2017; **17**(12): 1285-92.
